# Supplementary material for: Understanding the Nature of Arab-Israeli Conflict: A Corpus-based Study of Semantic Prosody in Arabic Political Discourse
Source: publisher site journal article supplement (doi:10.1515/les-2019-0017), 2019-11-05
Supplement: Supplementary file 1 [file les-2019-1007.pdf]

بسم الله الرحمن الرحيم  
أيها الإخوة والأخوات المواطنين الأعزاء

،السلام عليكم ورحمة الله وبركاته وبعد  
فيسرني أن أتوجه إليكم اليوم بتحية الاعتزاز بكم والسلام عليكم في كل مواقعكم مواقع العمل والبناء في الأرياف والبادية والمخيمات والمدن وفوق كل شبر من أرض الأردن العزيز  
أحييكم وأتوجه بالتهنئة الحارة إلى كل أخ وأخت منكم وأنتم تحتفلون بأعلى وأعز مناسبة على قلوبنا جميعاً عيد الاستقلال تلك المناسبة التي تجسد معنى الحرية والانتماء والتضحية من أجل الوطن والحياة الحرة الكريمة فكل عام وأنتم بخير وكل عام والأردن بألف خير  
،أما بعد أيها الاخوة والأخوات

فإن الاستقلال ليس مجرد إنجاز يرتبط بوقت محدد وإنما هو حالة مستمرة من العمل والبناء وتراكم الإنجازات والاستقلال لا يعني التحرر من القوى الخارجية التي تكبل إرادة الشعوب وحسب وإنما هو إلى جانب ذلك العمل من أجل محاربة الفقر والجهل والبطالة وكل مظاهر الفساد والمحسوبية وتحقيق التنمية الشاملة في مجتمع تسوده العدالة والمساواة وتكافؤ الفرص واحترام حقوق الإنسان  
،أما بعد أيها الاخوة والأخوات

إننا مقبلون على إجراء الانتخابات النيابية بعد أيام معدودة ونحن في الأردن نسعى لتعزيز مسيرتنا الديمقراطية من خلال تنمية الحياة السياسية والحزبية وتفعيل دور مؤسسات المجتمع المدني التي تشكل محوراً رئيسياً من محاور النهضة والتنمية الشاملة التي نسعى لتحقيقها ونحن ندرك أن من عناصر قوة الأردن في المستقبل الحفاظ على تميزه في المنطقة كنموذج في الانفتاح السياسي والاقتصادي وتبني مفهوم التنمية الشاملة وقد آن الأوان لتكثيف جهودنا من أجل تسريع عملية التنمية السياسية وتفعيل دور الأحزاب والاستمرار في صون الحريات العامة وسيحظى هذا الموضوع مني شخصياً بكل الاهتمام والمتابعة وعلى ذلك فلا بد لنا من مواصلة الانفتاح على العالم من حولنا والاستفادة من تجارب الآخرين ومعطيات هذا العصر العلمية والتكنولوجية والثقافية وهذا يستدعي بالضرورة وضع وتفعيل التشريعات والقوانين والخطط والبرامج التي تمكنا من تحقيق هذه الغاية ومواكبة روح العصر إلى جانب التنمية الاقتصادية والاجتماعية التي تنعكس آثارها الإيجابية على حياة الناس وتوفير الحياة الكريمة لكل مواطن ومواطنة

إن إحداث التغيير المطلوب وتحقيق التنمية المنشودة ليست مهمة فرد أو جهة واحدة وإنما هي مهمة كل فرد في المجتمع ولذلك لا بد من التركيز على عنصر الشباب ورعايتهم وتفعيل دورهم ومشاركتهم في عملية التنمية وإحداث التغيير وبناء المستقبل ضمن رؤية شاملة واضحة وعمل بروح الفريق الواحد المنتمي المؤمن برسائلته وقدرته على تحقيق الإنجاز وبناء على ما تقدم فإن أدنى درجات الانتماء والمواطنة الحقيقية تستدعي من كل أخ وأخت في هذا الوطن أن يبادر إلى القيام بواجبه وحقه في المشاركة في هذه الانتخابات وعند التفكير في اختيار المرشح المناسب فإن الانتماء والواجب الوطني يفرض علينا أن نختار بمنتهى الموضوعية الأفضل والأكفأ والأقدر على استيعاب الرؤية الوطنية لتحقيق التنمية الشاملة المنشودة

والنائب القادر على تحمل هذه المسؤولية الوطنية الكبيرة لا بد أن يكون على قدر من العلم والمعرفة والوعي والأمانة والانتماء الحقيقي لهذا الوطن وهو الذي يضع مصلحة الوطن فوق أي مصلحة شخصية أو حزبية أو جهوية وكلية ثقة بوعيكم الذي لا تحدعه الشعارات البراقة ولا العقائد والأفكار التي عفا عليها الزمن وأثبت فشلها في الماضي البعيد وفي الأمس القريب ولا الوعود التي يستخدمها البعض للتأثير على بعض الناخبين وكسب أصواتهم من خلال التشكيك بسلامة المسيرة وإشاعة روح القلق والخوف من المستقبل وهنا أود أن أطمئن الجميع بأننا والحمد لله قد اجتزنا الأزمة التي مرت بها المنطقة في الفترة الأخيرة بالحكمة والبعد عن القرارات العاطفية (التي يسعى أصحابها إلى تسجيل المواقف) وكسب الشعبية الزائفة على حساب المصلحة الوطنية العليا

،أما بعد أيها الاخوة والأخوات

لقد وعدتكم من قبل بأن تكون هذه الانتخابات حرةً ونزيهة وأنا عند وعدي وقد اتخذت الحكومة كافة الترتيبات والإجراءات التي تضمن نزاهة هذه الانتخابات وسهولة إجرائها وما أرجوه من كل أخ وأخت منكم هو المبادرة إلى القيام بواجبه الوطني وممارسة حقه في انتخاب النائب الذي يمثله بوعي وموضوعية وفي إطار من رؤيتنا الوطنية لتحقيق النهضة والتنمية الشاملة والمستقبل الذي نريد وأنا واثق من حرص كل واحد منا على أن نعكس الوجه الحضاري المشرق للأردن العزيز من خلال الحفاظ على وحدتنا الوطنية والالتزام بالنظام والانضباط وقواعد التنافس الشريف والقيم والأخلاق الأردنية الكريمة التي تجسد الأخوة والمحبة والتعاون بين أبناء الأسرة الأردنية الواحدة الكبيرة

،أما بعد أيها الاخوة والأخوات

لقد كان الأردن وسيظل بعون الله وفيماً لانتمائه العربي وحريصاً على الوفاء بالتزاماته نحو أمته العربية والدفاع عن قضايها العادلة وفي مقدمتها القضية الفلسطينية وعلى ذلك سنستمر في دعم الأشقاء الفلسطينيين وموقفهم من خارطة الطريق وصولاً إلى إقامة الدولة الفلسطينية المستقلة على التراب الفلسطيني أما العراق الشقيق فسنعمل ضمن أقصى

طاقاتنا من أجل وحدته وسلامة أراضيه وسيادة الشعب العراقي الشقيق على كامل أرضه وحقه في اختيار قيادته وعودته إلى مكانته الطبيعية في محيطه العربي.  
مرة أخرى أيها الأعزاء أتوجه بالتهنئة الحارة إلى كل واحد منكم بهذه المناسبة الغالية وإلى النشامى في القوات المسلحة والأجهزة الأمنية فهم رمز الاستقلال ودرع الوطن والعيون الساهرة على أمنه واستقراره فكل عام وأنتم جميعاً والنشامى والأردن العزيز بألف خير  
،،والسلام عليكم ورحمة الله وبركاته

بسم الله الرحمن الرحيم

والصلاة والسلام على سيدنا محمد النبي العربي الهاشمي الأمين

،أيها الأخوة والأخوات المواطنون الأعزاء

،السلام عليكم ورحمة الله وبركاته وبعد

فإنه ليسرني غاية السرور، أن أتوجه إليكم اليوم، بتحية الاعتزاز بكم، والتقدير لعطائكم، في سائر مواقعكم، وفي كل مكان من الأردن العزيز، وأنتم تواصلون مسيرة البناء والتنمية، وتحققون الإنجازات الكبيرة، التي تليق بعزيمتكم، وتصميمكم على استكمال بناء الأردن الحديث، الأردن الذي يوفر لأبنائه وبناته، فرص الحياة الكريمة، في مناخ من الحرية والديمقراطية، التي تمكن كل واحد منهم، من المشاركة في صنع القرارات، التي تؤثر في حياته ومستقبل أبنائه، وتفتح له الأبواب للمساهمة في مسيرة التنمية الشاملة، والاستفادة من مكاسبها، على أسس من العدالة والمساواة وتكافؤ الفرص

وقد رأيت أن أتحديث إليكم اليوم، وأضع أمامكم رؤيتي، لمسيرة الإصلاح السياسي والاقتصادي، والاجتماعي والإداري، التي بدأناها منذ خمس سنوات، والتي تشكل في مجموعها، طريقنا إلى التنمية المنشودة

وعلى ذلك، فإنني أرى أن التنمية السياسية والاقتصادية، والإدارية والاجتماعية، هي عملية متكاملة، ولا يجوز التعامل مع أي واحدة منها، على أنها وحدة مستقلة، أو منفصلة عن غيرها، وأنه لا بد من توسيع قاعدة المشاركة الشعبية، في هذه المسيرة، التي تحتاج إلى جهد ودعم كل واحد من أبناء الوطن

ولما كانت التنمية السياسية، هي المدخل لمشاركة مختلف الفعاليات الشعبية، ومؤسسات المجتمع المدني، في سائر جوانب عملية التنمية، فإنني أؤكد هنا، على أهمية أن تبدأ التنمية السياسية، من القواعد الشعبية، صعوداً إلى مراكز صنع القرار، وليس العكس

وبناءً على ما تقدم، وتعزيزاً لمسيرتنا الديمقراطية، واستكمالاً لعملية الإصلاح السياسي والاقتصادي، والاجتماعي والإداري، وحرصاً منا على إشراك المواطنين في محافظاتهم، في المرافق العامة، وأولويات الاستثمار، والإنفاق على المشاريع الرأسمالية والخدماتية، وفي الإشراف على أداء الأجهزة الرسمية، في مختلف المناطق، فقد رأينا أن نعيد النظر في التقسيمات الإدارية في المملكة، بحيث يكون لدينا عدد من المناطق التنموية أو الأقاليم، التي يضم كل إقليم منها، عدداً من المحافظات، ويكون لكل إقليم، مجلس محلي منتخب انتخاباً مباشراً، من سكان هذا الإقليم، ليقوم هذا المجلس، بالإضافة إلى المجالس البلدية المنتخبة في المحافظات، بتحديد الأولويات، ووضع الخطط والبرامج، المتعلقة بهذا الإقليم، بدلاً من اقتصر هذه المهمة، على صانع القرار في المركز، فأهل الإقليم أدرى بمصالحهم واحتياجاتهم، وسنعمل في أقرب وقت ممكن على تشكيل لجنة ملكية، لدراسة هذا التوجه من مختلف الجوانب، ووضع الآلية المناسبة لتنفيذه، وتحويله من فكرة إلى واقع ملموس

،أيها الأخوة والأخوات المواطنون الأعزاء

إنها مناسبة أتوجه فيها باسمكم جميعاً، بالتهنئة والمباركة، للأشقاء الفلسطينيين، بإنجازهم العظيم في إجراء الانتخابات الرئاسية، واختيار قيادتهم الشرعية، باعتبار هذا الإنجاز، خطوة رئيسية وضرورية، على طريق استعادة حقوقهم، وبناء دولتهم المستقلة على ترابهم الوطني، وسنكون لهم كما كنا على الدوام، السند والداعم الأقوى، حتى يتمكنوا من تحقيق طموحاتهم الوطنية المشروعة

وبهذه المناسبة أيضا، فإنني أتوجه إلى الأخوة والأشقاء في العراق، بمختلف فئاتهم وأطيافهم، بالدعوة المخلصة، إلى المشاركة في الانتخابات، التي ستجرى بعد أيام، لأنها الطريق الواقعي الوحيد، الذي سيمكنهم من تحقيق الأمن والاستقرار، وإعادة بناء وطنهم والعودة به، إلى وضعه الطبيعي ومكانته المتميزة في المنطقة

ومرة أخرى أيتها الأخوة والأخوات المواطنون الأعزاء، أحبيكم جميعا، وأكد على اعتزازي بكم، وأسأل المولى عز وجل، أن يحفظكم ويبارك فيكم، وأن يوفقنا جميعا لما فيه الخير لوطننا وأمتنا

والسلام عليكم ورحمة الله وبركاته

بسم الله الرحمن الرحيم

،،إخواني الأعزاء

الله يعطيكم العافية، وكل عام وأنتم والوطن بألف خير، بمناسبة يوم الجيش، الذي يصادف بعد يومين

وهذا اليوم، هو يوم مبارك، وعزيز على كل مواطن ومواطنة في هذا البلد، عزيز علينا، لأنه يوم الجيش، ويوم الثورة العربية الكبرى، وفي هذا اليوم، نستذكر بكل الفخر والاعتزاز، تضحيات الآباء والأجداد، الذين حملوا رسالة الثورة العربية، وساهموا في بناء هذا الوطن، وحمائته من كل الأخطار، والظروف الصعبة، التي مر بها طيلة العقود الماضية، وفي المقدمة النشامى والنشميات، أبناء القوات المسلحة، والأجهزة الأمنية، الذين نذروا حياتهم للدفاع عن هذا الوطن، وحماية مسيرته ومنجزاته

وكنت أتمنى لو أنني أستطيع في هذا اليوم، أن ألتقي بكل جندي وكل ضابط، لأهنئهم وأقول لهم، كل عام وأنتم بخير، لكن ظروف العمل تحول دون ذلك، لذلك أطلب من كل واحد منكم، أن ينقل لإخوانه وزملائه، في كل مواقعهم، تحياتي واعتزازي، واعتزاز كل مواطن في هذا البلد بكل فرد من النشامى والنشميات أبناء القوات المسلحة/ الجيش العربي، والأجهزة الأمنية

إننا نقدر أيها الأخوة، حجم المسؤوليات الكبيرة، التي يقوم بها الجيش العربي، والأجهزة الأمنية، وخاصة في هذه المرحلة، والظروف التي تمر بها المنطقة من حولنا، لذلك أريد من كل واحد من النشامى، أن يكون متأكدا أننا حريصون على تزويد قواتنا المسلحة، بكل وسائل القوة، وبكل وسائل المعرفة والتدريب والتسليح، حتى تبقى كما كانت على الدوام، مفخرة ومثالا في الكفاءة والاحتراف، والقدرة على تحقيق الإنجاز

ومن ناحية ثانية، أريد أن يتأكد النشامى أنني شخصيا حريص كل الحرص على توفير الحياة الكريمة، ومستوى المعيشة، التي تليق بتضحياتهم، وإخلاصهم وتفانيهم في خدمة الوطن

وأنا مدرك تماما، أن مكاسب التنمية وثمارها، لا بد أن يستفيد منها، كل مواطن وكل مواطنة، وفي مقدمتهم أبناء الجيش العربي والأمن العام والمخابرات العامة والدفاع المدني. إن مسيرة الإصلاح والتحديث والتنمية، التي قطعنا فيها شوطا كبيرا خلال السنوات الماضية، يجب أن تنعكس آثارها الإيجابية، على مستوى معيشة المواطن وطريقة حياته. لذلك، فقد أصدرت توجيهاتي للحكومة، بتخصيص نسبة من أسهم الشركات، التي في طريقها للخصخصة، لأبناء القوات المسلحة والأجهزة الأمنية والمتقاعدين العسكريين، حتى تباع لهم بأسعار تشجيعية، وتسديد ثمنها بطريقة مريحة وسهلة، من أجل تحسين مستوى الدخل، للأفراد والضباط في القوات المسلحة والأجهزة الأمنية، على المدى المتوسط والمدى البعيد

وأود أن تعرفوا أيها الأخوة، وأن يعرف إخوانكم وزملائكم، الذين لم يتواجدوا معنا الآن، أننا أنجزنا، خلال السنوات الستة الماضية الكثير من الإنجازات الاقتصادية والاجتماعية والسياسية، لكن التحديات ما زالت أمامنا كبيرة. وإنه لا بد من العمل بروح الفريق الواحد، لمواجهة هذه التحديات، وإيجاد الحلول المناسبة لكل مشاكلنا، من خلال الحوار الهادئ، والنقد الموضوعي البناء، الذي يخدم مصلحة الوطن قبل كل شيء، وليس مصالح فردية، أو أجندات خاصة

أما تبادل الاتهامات، والتجريح واغتيال الشخصية، والانتقاص من الإنجازات الوطنية، فهي أمور تسيء للصورة المشرقة لهذا الوطن، وتشكل عقبات أمام المسيرة، لذلك يجب أن نتوقف

الإصلاح أيها الأخوة برنامج وطني، لا رجعة عنه، وهو لا يرتبط بأشخاص أو بمرحلة، فهو برنامج لبناء الوطن النموذج، الذي يتساوى فيه الجميع في الحقوق والواجبات، فليس هناك فرق بين مواطن ومواطن آخر، إلا بمقدار ما يعطي كل واحد للوطن، فهذا الوطن يجب أن يكون وطن العدالة والمساواة، ووطن الحرية والتعددية، واحترام الرأي الآخر، ومثلما كنتم على الدوام، حماة الوطن وحماة المسيرة والإنجازات، أنتم اليوم الأيدي الأمانة والقادرة على حماية مسيرة الإصلاح والتحديث والتطوير، التي هي طريقنا إلى تحقيق التنمية الشاملة، وتحقيق طموحات شعبنا وبلدنا العزيز

ومرة ثانية أيها الأخوة أوجه تحية الاعتزاز والتقدير لكل النشامى والنشميات، في كل مواقعهم. وكل عام وأنتم جميعا والأردن العزيز بألف خير

وبارك الله فيكم والله يعطيكم العافية

بسم الله الرحمن الرحيم

والحمد لله رب العالمين، والصلاة والسلام على سيدنا محمد، وعلى آله وصحبه أجمعين

أيها الإخوة العلماء الأفاضل،

أيها الإخوة الحضور الكرام

السّلام عليكم ورحمة الله وبركاته، وبعد

فإنّه ليسرّني غاية السّرور أن أرحب بكم أجمل التّرحيب، وأنتم تجتمعون اليوم في عمّان، للبحث في مختلف القضايا والتّحديات التي تواجه الأُمّة الإسلاميّة. فأهلاً ومرحباً بكم ضيوفاً وعلماء لهم كلّ الاحترام والتّقدير

، أيّها الإخوة الأعزّاء

لقد أرسى الإسلام عبر العصور أحسن القواعد للعلاقات الإنسانيّة بين الأفراد والأُمم والشّعوب، بغض النّظر عن الاختلاف في العقيدة أو اللّون أو الجنس، على قاعدة من التّسامح والحوار مع الآخرين، لما فيه الخير للإنسان في كل مكان وفي كل زمان. لكنّ المشكلة اليوم هي ما تتعرّض له الأُمّة الإسلاميّة من حملات التّشويه والإساءة والتّجني على الدور الذي يمكن أن تنهض به هذه الأُمّة في هذا العصر

وبداية، دعونا نعتزّف بأنّنا نحن المسلمين قد قصّرنا في حق ديننا وفي حق أنفسنا. وقد أسهم بعض من المسلمين أو ممّن يرفعون شعارات إسلاميّة في تشويه صورة الإسلام والمسلمين، والإساءة إليهم، بقصد أو بغير قصد

فالفرقة بين أبناء الأُمّة، وأعمال العنف والإرهاب التي تمارسها بعض الجماعات والمنظّمات، وما يجري في العراق والباكستان وغيرها من بلاد المسلمين من تبادل تُهم التّكفير وقتل المسلمين باسم الإسلام، كلّها أمور مخالفة لجوهر الإسلام، والإسلام منها بريء، وهذه فتنة وفساد في الأرض، لأنها تعطي المبررات لغير المسلمين للحكم على الإسلام من هذا المنظور، والتّدخل في شؤون المسلمين واستغلالهم

وقد رأينا أنّ من واجبا كمسلمين، عامرة قلوبنا بمحبّة الله ورسوله، أن نكون في طليعة من يتصدّون لهذه الحملات الظّالمة، التي يتعرّض لها الإسلام. وأنّ نكون في طليعة الدّاعين إلى نبذ الخلاف بين المسلمين، وتوحيد كلمتهم وموقفهم. ومن هنا جاءت رسالة عمّان، التي أعلنّاها في شهر رمضان الفضيل في العام الماضي، من مسجد الهاشميّين في عمّان

ثم دعونا إلى عقد هذا المؤتمر، الذي يجتمع فيه ممثلون لأتباع المذاهب الإسلامية الثمانية، من مختلف البلدان والأقطار، للبحث في العديد من القضايا والتحديات التي تواجه الأمة، ووضع الحلول الجذرية لكل هذه التحديات.

وأولى هذه القضايا وأهمها، هي توحيد موقف أتباع المذاهب الإسلامية الثمانية: السنية الأربعة، والجعفري والأباضي والزيدي والظاهرية، على مبدأ اعتراف أتباع كل مذهب من هذه المذاهب بصحة إسلام أتباع المذاهب الأخرى، وعدم جواز تكفير أي مسلم من أتباعها، باختلاف العلماء رحمة، ولنقتدي بقول الإمام الشافعي

"مذهبنا صواب ويحتمل الخطأ، ومذهب خلافتنا خطأ ويحتمل الصواب"

وقد أفتى كبار علماء المسلمين ومراجعهم الموثوقة، وفتاواهم بين أيديكم، بصحة هذا المبدأ وجوازه، لأن أتباع المذاهب الثمانية متفقون على المبادئ الأساسية للإسلام، فكُلهم يؤمنون بالله سبحانه وتعالى واحداً أحداً، وبأن القرآن الكريم كلام الله المنزل، وبسيدنا محمد عليه الصلاة والسلام نبياً ورسولاً للبشرية كافة. وكُلهم متفقون على أركان الإسلام الخمسة: (الشهادتين والصلاة والزكاة وصوم رمضان وحج البيت). وعلى أركان الإيمان وهي الإيمان بالله وملائكته وكتبه ورسله واليوم الآخر وبالقدر خيره وشره

أما الاختلاف فهو على بعض المسائل الفرعية، التي ظهرت بعد وفاة سيدنا محمد عليه الصلاة والسلام، لأسباب تتعلق بالخلافة، وبعض أمور الدنيا والسياسة. وقد تضمنت فتاوى كبار علماء الأمة الإسلامية صحة التعبد بأي من المذاهب الإسلامية الثمانية

وأفتى شيخ الأزهر، بأن الفكر الصوفي المعتدل مقبول ما دام يستند إلى شهادة أن لا إله إلا الله، وأن محمداً رسول الله، والتمسك بأركان الإسلام الخمسة والقرآن الكريم. ذلك أن الاعتراف بالمذاهب، هو اعتراف بمنهجية الإفتاء، وتحديد من هو المؤهل لهذه المهمة. مما يؤدي إن شاء الله إلى عدم تكفير بعضنا بعضاً، وإغلاق الباب أمام الجاهلين الذين يمارسون أعمال القتل والإرهاب باسم الإسلام، والإسلام منها بريء

،أيها الإخوة العلماء الأفاضل

إنكم تجتمعون اليوم، وعلى جدول أعمالكم العديد من القضايا والتحديات التي تواجهها الأمة الإسلامية. وأنتم بعون الله أهل للتصدي لهذه القضايا والتحديات، وتحديد موقف الإسلام من كل واحدة منها. وإن من أهم واجباتنا كمسلمين، أن نقدم الإسلام بصورته الحقيقية المشرقة. فالإسلام دين الوسطية والاعتدال والتسامح والرحمة، ومحاورة الآخرين بالعقل والحجة، وليس دين العنف والإرهاب، أو التعصب والانغلاق. يقول الله سبحانه وتعالى

أدْعُ إِلَى سَبِيلِ رَبِّكَ بِالْحُكْمَةِ وَالْمَوْعِظَةِ الْحَسَنَةِ وَجَادِلْهُمْ بِالَّتِي هِيَ أَحْسَنُ إِنَّ رَبَّكَ هُوَ أَعْلَمُ بِمَنْ ضَلَّ عَنْ سَبِيلِهِ وَهُوَ أَعْلَمُ (125 بالمهتدين) (النحل)

وقد قدم الإسلام أحسن الأحكام في حماية حقوق الإنسان، وصون حريته وكرامته الإنسانية، بغض النظر عن دينه أو جنسه أو لونه. يقول الله تعالى

يَا أَيُّهَا النَّاسُ إِنَّا خَلَقْنَاكُمْ مِنْ ذَكَرٍ وَأُنْثَى وَجَعَلْنَاكُمْ شُعُوبًا وَقَبَائِلَ لِتَعَارَفُوا إِنَّ أَكْرَمَكُمْ عِنْدَ اللَّهِ أَتْقَاكُمْ إِنَّ اللَّهَ عَلِيمٌ خَبِيرٌ (13) (الحجرات)

وأكد على أهمية احترام حقوق الأقليات وغير المسلمين، الذين يعيشون داخل المجتمع المسلم. ووضع لنا المنهج الواضح في احترام العلاقات، والوفاء بالعهود بين المسلمين وغيرهم من الأمم والشعوب

يقول الله تعالى

(34) وأوفوا بالعهد إنَّ العهد كان مسؤولاً (الإسراء)

:وإنَّ الإسلام الذي يرفض التعصب والانغلاق يدعونا إلى العلم والمعرفة. يقول الله تعالى

(9) هَلْ يَسْتَوِي الَّذِينَ يَعْلَمُونَ وَالَّذِينَ لَا يَعْلَمُونَ (الزمر)

ویدعوننا إلى الانفتاح على الآخرين، والاستفادة من تجاربهم وخبراتهم في شتى ميادين الحياة. يقول الله تعالى

(43) فاسألوا أهل الذكر إن كنتم لا تعلمون (النحل)

،أيها الإخوة العلماء الأفاضل

إنني على ثقة تامة بأنكم مدركون لحجم التحديات التي تواجه المسلمين الي

بسم الله الرحمن الرحيم

الإخوة الأعزّاء

الله يعطيكم العافية، وأهلاً ومرحباً بالجميع في بيتكم وبيت كل الأردنيين، وأنا من زمان كنت أفكر بأنه يجب أن نلتقي كلنا مع بعض أعيان ونواب وحكومة، على اعتبار إنه إحنا كلنا فريق واحد يعمل من أجل تحقيق هدف واحد ومصلحة واحدة وهي المصلحة الوطنية، التي لا بد أن تكون فوق كل المصالح والاعتبارات

وإذا سمحتم لي "خلينا نحكي بصراحة" ونعترف أن هناك بعض التقصير، وفيه بعض الأخطاء وهذا التقصير وهذه الأخطاء، لا تتحمل المسؤولية عنها جهة أو طرف لوحده وإنما هي مسؤولية الجميع

أنا حكيت يا إخوان مرات عديدة إنه لا بد من العمل بروح الفريق الواحد، وإننا جميعاً أعيان ونواب وحكومة شركاء في تحمل المسؤولية وكلنا في خندق واحد، وأن العلاقة بين السلطات الثلاث وخاصة السلطة التشريعية والسلطة التنفيذية لازم تكون علاقة تعاون وتكامل ومبنية على الثقة والاحترام والشعور بالمسؤولية المشتركة، لكن مع الأسف ما زالت أمامنا بعض مظاهر عدم الثقة وتبادل الاتهامات أو إلقاء اللوم والمسؤولية من كل فريق على الفريق الآخر، والمؤسف أكثر شدّ "الحبل بين الحكومة والنواب" ومين اللي بيقدّر يلوي ذراع الثاني

وبصراحة أكثر يا إخوان إذا كان الإخوة النواب غير راضيين عن أداء الحكومة، فإن المواطنين "وأنا أعرف أبناء شعبي" غير راضيين عن أداء الإخوة النواب

وعندما نواجه مشكلة يبدأ كل واحد بتحميل المسؤولية لغيره أو يكتفي بموقف المتفرج أو المراقب، وبالتالي مطلوب من رأس الدولة أو الملك أن يتدخل وكأن المسؤولية مسؤوليته لوحده، لا يا إخوان المسؤولية مسؤولية الجميع وكلّ واحد لازم يقوم بواجبه ويتحمل مسؤوليته بشجاعة وإخلاص، ومن غير المعقول ولا المقبول أن يتدخل الملك في كل صغيرة وكبيرة أو يحمل المسؤولية لوحده

ومن أيام الوالد رحمه الله كان بعض المسؤولين "لما بدّه يمشي قرار أو تكون النتائج سلبية، هذا المسؤول يحكي للناس والله كان عندنا توجيهات من فوق، يعني من الملك واليوم بصير نفس الشيء، لكن بدل ما يحكي توجيهات من فوق صارت "توجيهات من رأس الهرم

وأنا أعرف موقف كلّ واحد منكم الموجودين الآن في موقع المسؤولية أو الذين كانوا في موقع المسؤولية ومطلوب مني أن أتحمّل الجميع وأستوعب الجميع، بروح الأب أو الأخ الكبير

و هنا أتمنى على كلّ واحد يا إخوان أن يعرف أنّه عندما يغادر موقع المسؤولية أو الكرسي فهذا لا يعني أنه معفى من المسؤولية، بالعكس هو جندي احتياط وعليه واجب ومسؤولية تجاه الوطن الذي أكرمه في يوم من الأيام ووضعه في موقع المسؤولية المتقدم

أما عندما يكون الواحد في المنصب كلّ شيء صحيح وعندما لا يكون في المنصب كلّ شيء غلط فهذا منطق مرفوض وعيب.

الانتقاد يا إخوان ما فيه أسهل منه لكن المهم هو طرح البديل والروح الإيجابية والشجاعة في مواجهة المشاكل ووضع الحلول الواقعية لهذه المشاكل.

على سبيل المثال هناك كلام كثير عن البطالة وعن تقصير في التصدي لهذه المشكلة وأنا مثل ما بتعرفوا كلكم أتابع هذا الموضوع باهتمام كبير وطلبت من الإخوان النواب أن يعطونا خطط وحلول لمعالجة هذه المشكلة في مناطقهم لكن مع الأسف ما وصلني أي شيء إلا من نائب واحد أو اثنين وهذا يعني إنّه لا يوجد متابعة ونحن جميعا نعرف أن السبب الرئيسي في هذه المشكلة هو ليس عدم وجود فرص العمل وإنما عدم الرغبة في العمل المهني أو اليدوي بمعنى أنّ هذه البطالة سببها مفاهيم اجتماعية غير صحيحة.

في بعض المحافظات وقّرنا مئات من فرص العمل وطلّبنا من الشباب أن يستلموها وكانت النتيجة إنّه لم يتقدّم منهم إلا عدد يساوي أصابع اليد الواحدة لأن كل هؤلاء الشباب يريدون وظائف مكتبية وفي نفس الوقت وجدنا أن أكثر الشابات والصبايا اللاتي وفرنا لهن فرص عمل مهنية أو يدوية التحقن جميعا بالعمل وكُنّ مرتاحات بهذا العمل وهذا شيء إيجابي ويرفع الرأس.

وهذا الموضوع يقودنا إلى موضوع الوساطة وهنا أتمنّى على كلّ واحد من الإخوة النواب أو الأعيان أو الوزراء بدل ما يتوسّط لأحد الناس من أجل الحصول على وظيفة أن نحاول كلّنا تغيير نظرة أبنائنا وبناتنا للعمل وللوظيفة ولأزم يفهموا أن العمل المهني أو اليدوي ليس أقلّ أهمية أو احترام أو حتى مردود مادي من عمل المكتب وأنّ الوساطة عمل غير شريف ولا يجوز أن يبدأ الواحد من أبنائنا أو بناتنا حياته العملية بأسلوب غير شريف أو بشكل من أشكال الفساد.

التحديات أمامنا كبيرة وهي بحاجة إلى جهد وعمل وإلى تعاون وشراسة حقيقية بين الجميع أما الحكي في الصالونات، وهي غير موجودة والحمد لله إلا في بعض مناطق العاصمة والتي يمارس بعض رؤاها أو أصحابها تسريب الإشاعات والأخبار الكاذبة إلى الصحافه الأجنبية لخدمة أجنداتهم الخاصة أو الاستقواء على هذا الوطن من خلال علاقاتهم ببعض الجهات الخارجية وأريد أن يعرف هؤلاء الأشخاص أن لا أحد يستطيع أن يستقوي على الوطن ولا علينا لأننا على حقّ وانتماءنا لهذا الوطن أقوى بكثير من كلّ من يحاول الاستقواء بأيّ جهة أخرى وأنا أعرف هؤلاء الأشخاص وأعرف أهدافهم وحركاتهم حتى أنا ما سلمت من الطخّ والحكي الفارغ وهناك أيضا بعض الصحف الأسبوعية التي تمارس التنافس بينها في نشر الإشاعات والأكاذيب من أجل الربح المادي ولو على حساب المصلحة الوطنية والتي تمارس الطخّ بكلّ الاتجاهات وعلى كلّ المسؤولين فهذه يجب أن نترفع عن المشاركة فيها وعن ترويج ما يصدر عنها من إشاعات واتهامات وتجنّي على عباد الله والذي أريد أن يعرفه كلّ مواطن وكلّ مواطنة في هذا البلد أنني للجميع وما فيه عندي حدا مقرب أو محسوب عليّ أكثر من غيره ومكانة أيّ مواطن أو مسؤول عندي هي بمقدار ما يخدم هذا البلد بإخلاص وأمانة وبغضّ النظر عن أيّ روابط أو علاقات إنسانية أو شخصية.

التحديات التي أمامنا يا إخوان أكبر بكثير من الوقوف عند مين بده يصير وزير أو بده يصير رئيس وزراء أو رئيس مجلس نواب أو أعيان، ومصلحة الوطن يا إخوان أكبر من كلّ المناصب ومن كلّ المكاسب وليس من مصلحة الوطن أن تصبح العلاقة بين السلطة التشريعية والسلطة التنفيذية علاقة صراع أو شدّ حبل ولا من مصلحة الوطن أن يتحوّل مجلس النواب إلى ساحة معركة بين الكتل أو مراكز القوى مثلما يسمّيها بعض الإخوان.

أنا أعرف يا إخوان وأقدر مخاوف بعضكم من احتمال وجود مخططات لإعادة رسم خارطة المنطقة ومن تسوية بعض القضايا التاريخية على حساب الأردن والمقصود هنا موضوع التّوطين والوطن البديل وبصراحة يا إخوان نحن في الأردن من غرب النهر ومن شرقه ومن شمال الأردن وجنوبه يجب أن نتصدّى لأيّ مخطط يهدف إلى حرمان الأشقاء الفلسطينيين من حقهم في العودة إلى وطنهم أو حقهم في إقامة دولتهم المستقلة على التراب الفلسطيني وليس في أيّ مكان آخر لأنه إذا كان هذا المخطط موجود فهو مؤامرة على الشعب الفلسطيني مثل ما هو مؤامرة على الأردن ولست وحدي الذي يجب أن يتصدّى لمثل هذه المؤامرة إن كانت موجودة لا يا إخوان كلّنا يجب أن نتصدّى لهذا الخطر وأولنا الأردنيين الذين هم من أصول فلسطينية.

والذي أود أن يعرفه الجميع أن الطريق الوحيد أمامنا للوقوف في وجه أيّ مخططات إن كانت موجودة وأيّ أخطار تهدد هذا البلد هو أن يكون الأردن قوي ومتقدم اقتصاديا واجتماعيا وسياسيا أما إذا كان لا سمح الله ضعيف فسوف يطمع فيه

الأقوياء وإذا أردنا أن يكون الأردن قوي لازم نكون كلنا فريق واحد ويد واحدة ولازم نواصل مسيرة الإصلاح والتحديث والتطوير وهذه المسيرة تلزمها تشريعات وقوانين وأي تأخير في إنجاز هذه التشريعات سيكون عائقاً أمامنا وأمام المسيرة ونحن يا إخوان على أبواب مرحلة جديدة من التحديث والتطوير وهي تحتاج إلى تشريعات جديدة لذلك أرجو من الجميع أن نعمل بأقصى طاقاتنا وبأعلى درجات الشعور بالمسؤولية

وأنا عندما أتحدث معكم بهذه الدرجة من الصراحة والشفافية فالمقصود هو المصلحة الوطنية والاستعداد للتصدي لأي مشكلة يمكن أن تواجهنا في المستقبل

بارك الله فيكم والله يعطيكم العافية

---

في البداية اتوجه بالتعزية الحارة لأسر وأهالي الشهداء والضحايا الأبرياء وبالدعاء للمصابين والجرحى بالشفاء العاجل بإذن الله

وهذه ليست المرة الأولى التي يتعرض فيها الأردن إلى مثل هذه الأعمال الإرهابية الجبانة، والأردن ليس البلد الوحيد الذي يتعرض لمثل هذه الأعمال فالكثير من دول المنطقة وكثير من بلدان العالم تعرضت لمثل هذه الأعمال الإرهابية وربما أكثر واكبر منها

ونحن نعرف ان الاردن مستهدف ربما أكثر من غيره لأسباب كثيرة منها دوره ورسالته في الدفاع عن جوهر الاسلام دين الاعتدال والتسامح ومحاربة الارهابيين الذين يقتلون الابرياء باسم الاسلام والاسلام منهم بريء

ونؤكد هنا للجميع باننا سنلاحق هؤلاء المجرمين ومن يقف ورائهم وسنصل اليهم اينما كانوا ونخرجهم من جحورهم ونقدمهم للعدالة والاردن لا يخاف ولا يقبل الابتزاز ولا يمكن لهذه الأعمال أن تدفعنا الى تغيير مواقفنا أو قناعاتنا أو التراجع عن دورنا بمحاربة الارهاب بكل اشكاله

وكل عمل اجرامي جبان يتعرض له الأردن سيزيدنا قوة على التمسك بمواقفنا وعلى التصدي بقوة لكل من يحاول العبث بأمن هذا البلد واستقراره

ثقتنا بأجهزتنا الامنية وبقدرتها على حماية أمن هذا البلد واستقراره ثقة كبيرة جدا واذا نجح الارهابيون في تنفيذ عملية هنا وهناك، فقد احبطنا في السابق - والحمد لله - العديد من محاولات ومخططات الإرهابيين التي استهدفت هذا البلد

وارجو من كل مواطن وكل مواطنة في هذا البلد أن يعتبر نفسه جنديا ورجل أمن وان عليه مسؤولية في حماية بلده، لذلك مطلوب من الجميع المزيد من الحذر والانتباه والتعاون بين المواطن والإجهزة الأمنية لإحباط اي محاولة للعبث بأمن هذا البلد او استقراره. وكلنا لازم نكون يد واحدة وقلب واحد في التصدي لهذه المجموعات الإرهابية الجبانة التي لا دين لها ولا ضمير

وانا واثق ان النشامى والنشميات من ابناء هذا الوطن سيكونوا كما كانوا على الدوام العيون الساهرة على امن الاردن العزيز والذراع القوية والقادرة على حماية مسيرته ومنجزاته

وسيطل الاردن بعون الله وعزيمة ابنائه وبناته أقوى من كل عناصر الشر والإرهاب

وكل الشكر والتقدير والاعتزاز لكل الاجهزة الامنية والعسكرية والمدنية والمواطنين الذين هبوا هبة رجل واحد لمواجهة اثار هذه التفجيرات التي تعرضت لها عمان العزيزة الغالية

---

ألقى مندوباً عن جلالة دولة رئيس الوزراء الدكتور عدنان بدران



يسعدني ان ارحب بكم اجمل ترحيب في هذا الحمى العربي الاصيل متمنيا لكم اقامة طيبة واعمالا ناجحة ونتائج بناءة تسهم في مكافحة الجريمة والحد منها والسيطرة عليها

ان مؤتمركم الذي يناقش ضمن بنود جدول اعماله اهم القضايا الامنية المعاصرة في سبيل حماية المواطن العربي والمحافظة على امنه واستقراره وتوفير حياة كريمة له وللجيل القادم يشكل في الوقت ذاته احدى اللبئات الاساسية لمقومات العمل الامني العربي المشترك وهو العمل الذي تسهرون على توطيد بنائه وتعزيز قدراته في اطار مسؤولياتكم الكبيرة ومهامكم الجسام

ان المستجدات الدولية والمتغيرات الحضارية وصراع الثقافات اصبحت تتطلب جهودا موازية تستجيب لهذه المتغيرات على كافة الصعد وعلى الصعيد الامني بشكل خاص وهنا تكمن الحاجة الملحة لمزيد من العزم في التصدي للجريمة بكافة اشكالها وصورها وفي مقدمتها الارهاب الذي اکتوت الشعوب العربية بناره وما حدث في الايام القليلة الماضية في عمان لدليل ساطع على عمى البصيرة وانحراف الفكر وجسامة الخسائر عندما استهدفت الفئة الضالة الابرياء في الفنادق فقتلوا الفرح واستعدوا شعوبا اخرى لم يكن لهم من ذنب الا ان كانوا في مكان وزمان غير ملائمين مما يتطلب تعاوننا دوليا حثيثا لتعزيز الجهود المبذولة في هذا المجال بدءا من الانضمام الى الصكوك الدولية لمكافحة الارهاب والصكوك ذات الصلة بمكافحة الجريمة ومنها اتفاقية الامم المتحدة لمكافحة الجريمة المنظمة عبر الوطنية والبروتوكولات الملحق بها واتفاقية الامم المتحدة لمكافحة الفساد وكذلك دعم الجهود المبذولة لاعداد اتفاقية دولية لمكافحة الارهاب

ويسرني في هذا المقام ان انوه بكل فخر واعتزاز وتقدير بالجهود الحثيثة والانجازات المتميزة لمجلس وزراء الداخلية العرب في مجال مكافحة الجريمة بانماطها المختلفة وهو عطاء اصبح نموذجا يحتذى على المستويين العربي والاقليمي وذلك بفضل جهود ورعاية صاحب السمو الملكي الامير نايف بن عبد العزيز وزير الداخلية في المملكة العربية السعودية والرئيس الفخري لمجلس وزراء الداخلية العرب وزملائه اصحاب السمو والمعالي وزراء الداخلية العرب

سعادة رئيس المؤتمر

السيدات والسادة

اتمنى على مؤتمركم الموقر ان يأخذ بعين الاعتبار وضع الية عربية موحدة لدراسة اساليب المنظمات الارهابية وطرقها في نشر الافكار المتطرفة والتلاعب بالعواطف والمعتقدات وتجيش النفوس وغسل الادمغة عند الناشئة والعمل على تفنيد زيف تلك الافكار وزورها وبهتانها والتنبيه لها والتحذير من نتائجها وبناء ثقافة مجتمعية تنبذ الفكر الارهابي وتنبت العصبية التي تقود الى العنف

ولا بد ان تتضمن تلك الالية العربية الموحدة اطرا شاملة لتعزيز التعاون والتنسيق والمتابعة بين الاجهزة الامنية وبين المواطنين في كافة مواقعهم لنبت العنف بكافة اشكاله وصورة وقمع الارهاب ودوافعه وتجفيف منابعه انطلاقا من ان التصدي للارهاب مسؤولية جماعية مشتركة وان التنشئة الاسرية السليمة تشكل اسسا منيعة لوقاية الابناء من السلوك الارهابي وكذلك التنديد بما تبني عليه الاعمال الارهابية من فهم خاطيء لمبادئ الشريعة الاسلامية السمحة واحكامها والتركيز على براءة الاسلام من هذه الافكار كونه دين التسامح والسلام والوسطية والتي تنبذ الغلو والتطرف وتقاومه وما رسالة عمان الا انموذجا يحتذى في هذا المجال

انني على يقين بان تعاونكم المتواصل والتنسيق بين اجهزكم الامنية المختصة يشكل سدا منيعا لتفويت الفرص على كل من تسول له نفسه العبث بمقدرات الشعوب وامنها وخصوصا العصابات الارهابية التي اصبحت تشكل ادوات للهجمة الشرسة على ديننا الحنيف بسبب ممارستها لابع انواع العنف والاجرام وارتكاب ما حرم الله من قتل الابرياء بدون وجه حق

ووفقكم الله في اعمالكم ولقائكم هذا وسدد على طريق الخير خطاكم واخذ بأيديكم نحو توصيات بناءه فاعلة تدعم العمل "العربي الامني المشترك وتعزز سبل تنفيذه لقوله تعالى "وقل اعملوا فسيرى الله عملكم ورسوله والمؤمنون

بسم الله الرحمن الرحيم

والحمد لله رب العالمين، والصلاة والسلام على سيدنا محمد وعلى آل بيته الطاهرين الطيبين

أصحاب الجلالة والسيادة والسمو  
ملوك ورؤساء وأمراء الدول الإسلامية  
السلام عليكم ورحمة الله وبركاته وبعد

فيأتي انعقاد هذه القمة الاستثنائية، في مكة المكرمة، وبدعوة كريمة من خادم الحرمين الشريفين الملك عبدالله بن عبد العزيز والأمة الإسلامية تواجه العديد من التحديات والتي لا سبيل إلى مواجهتها والتغلب عليها إلا من خلال نبذ ما بين أبناء هذه الأمة من خلافات، وتعزيز سبل التعاون والتكامل فيما بينهم، وتوحيد كلمتهم وصفوفهم ومواقفهم إزاء مختلف هذه القضايا والتحديات وذلك ضمن رؤية واحدة وقواعد مستمدة من جوهر الإسلام الذي يجمع ولا يفرق ويدعو إلى وحدة المسلمين بغض النظر عن الاختلاف في اللون أو الجنس أو المذهب

وبالرغم من قناعتنا بأهمية وحيوية المواضيع والمحاور المدرجة على جدول أعمال هذه القمة ومشروع برنامج العمل العشري لمنظمة المؤتمر الإسلامي إلا أننا في المملكة الأردنية الهاشمية نؤكد من جديد على أن الموضوع الذي ينبغي أن يتقدم على كل هذه المواضيع هو الاتفاق فيما بيننا كمسلمين على من هو المسلم وعلى شروط الإفتاء لأن عدم الاتفاق على هاتين المسألتين هو سبب الفرقة والاختلاف وتبادل تهم التكفير والاقتتال بين أبناء الدين الواحد ولا يعقل أن نتحدث عن التعاون والتكامل بين المسلمين وتوحيد صفوفهم ومواقفهم إزاء تحديات العصر أو علاقتهم بغيرهم من الأمم والشعوب قبل أن يتفقوا فيما بينهم على صحة إسلام أتباع كل مذهب منهم وعلى شروط الإفتاء التي تنظم علاقاتهم فيما بينهم وتوحد مواقفهم إزاء مختلف القضايا وتحديات هذا العصر

وقد قمنا بحمد الله سبحانه وتعالى وبالتوفيق منه في المملكة الأردنية الهاشمية بعقد المؤتمر الإسلامي الدولي في عمان في الفترة ما بين 27-29 جمادى الأولى 1426 للهجرة، وبمشاركة أكثر من مئة وسبعين عالماً من مختلف بلاد المسلمين، ومن أتباع المذاهب الإسلامية الثمانية حيث أقر ممثلو أتباع هذه المذاهب بناءً على فتاوى جميع المراجع الدينية الإسلامية وأجمعوا على ما يلي

أولاً: إن كل من يتبع أحد المذاهب الأربعة من أهل السنة والجماعة (الحنفي، والمالكي، والشافعي، والحنبلي) والمذهبيين الشيعيين (الجعفري والزيدي) والمذهب الإباضي والمذهب الظاهري فهو مسلم ولا يجوز تكفيره وبحرم دمه وعرضه وماله ولا يجوز أيضاً تكفير أصحاب العقيدة الأشعرية ومن يمارس التصوف الحقيقي وكذلك لا يجوز تكفير أصحاب الفكر السلفي الصحيح كما لا يجوز تكفير أي فئة أخرى من المسلمين تؤمن بالله سبحانه وتعالى وبرسوله صلى الله عليه وسلم وأركان الإيمان وتحترم أركان الإسلام ولا تنكر معلوماً من الدين بالضرورة

ثانياً: إن ما يجمع بين المذاهب أكثر بكثير مما بينها من الاختلاف فأصحاب المذاهب الثمانية متفقون على المبادئ الأساسية للإسلام فكلهم يؤمنون بالله سبحانه وتعالى واحداً واحداً وبأن القرآن الكريم كلام الله المنزل وسيدنا محمد عليه الصلاة والسلام نبياً ورسولاً للبشرية كافة وكلهم متفقون على أركان الإسلام الخمسة الشهادتين، والصلاة، والزكاة وصوم رمضان، وحج البيت وعلى أركان الإيمان الإيمان بالله، وملائكته وكتبه ورسله واليوم الآخر وبالفقر خيره وشره واختلاف العلماء من أصحاب المذاهب هو اختلاف في الفروع وليس في الأصول وهو رحمة وقديماً قيل أن اختلاف العلماء في الرأي أمر جيد

ثالثاً: إن الاعتراف بالمذاهب في الإسلام يعني الالتزام بمنهجية معينة في الفتاوى فلا يجوز لأحد أن يتصدى للإفتاء دون مؤهلات شخصية يحددها كل مذهب ولا يجوز الإفتاء دون التقيد بمنهجية المذهب ولا يجوز لأحد أن يدعي الاجتهاد ويستحدث مذهباً جديداً أو يقدم فتاوى مرفوضة تخرج المسلمين عن قواعد الشريعة وثوابتها وما استقر من مذاهبها

وقد قدمنا توصيات هذا المؤتمر إلى منتدى مكة المكرمة للعلماء والمفكرين المسلمين الذي انعقد في مكة المكرمة بدعوة من خادم الحرمين الشريفين وقد تبني العلماء المشاركون في هذا المنتدى وبخاصة لجنة الفكر الإسلامي والثقافة والتعليم هذه التوصيات على أساس أن ذلك سيتيح عرضها على هذه القمة

وعلى هذا الأساس فإننا نؤكد موقفنا بضرورة إدراج توصيات وقرارات المؤتمر الإسلامي الدولي الذي عقد في عمان والتي ذكرتها بنصها في البيان الختامي لهذه القمة واعتمادها كمرجعية، وقاعدة لتسوية الخلافات بين المسلمين وإغلاق الباب أمام بعض من يمارسون الإفتاء بغير وجه حق وتكفير بعض المسلمين وقتلهم باسم الإسلام والإسلام منهم بريء

وهذا هو جوهر رسالة عمان وهو ما ينسجم تماماً مع مشروع الإسلام الحضاري الذي طرح في ماليزيا

وفي الختام أتوجه بعميق الشكر والتقدير إلى خادم الحرمين الشريفين الملك عبدالله بن عبدالعزيز والمملكة العربية السعودية الشقيقة والأمانة العامة لمنظمة المؤتمر الإسلامي على استضافة هذا المؤتمر وعلى حسن الترتيب والإعداد الجيد لهذه القمة

والسلام عليكم ورحمة الله وبركاته

بسم الله الرحمن الرحيم

،إخواني وأخواتي الأعزاء

الله يعطيكم العافية وكل عام وأنتم والوطن بألف خير

هذا اليوم يوم مبارك وعزيز على قلب كل أردني وأردنية من أبناء وأحفاد الرعيل الأول الذين قدموا التضحيات الكبيرة من أجل استقلال الوطن وتحرير إرادة الإنسان الأردني

وفي هذا اليوم من حقنا، ومن واجبنا أن نذكر بالفخر والإعتزاز الآباء والأجداد من الرعيل الأول والمؤسسين والرواد منذ الجد المؤسس وحتى اليوم الذين ساهموا في بناء هذا الوطن بالرغم من كل التحديات والظروف الصعبة التي عاشها طيلة الستين سنة الماضية، وبالرغم من قلة الموارد والإمكانيات، ومن المآسي والحروب التي مرت على هذه المنطقة، استطاع النشأامي والنشأميات من أبناء هذه الأسرة الأردنية الواحدة بقيادة الملك الباني الحسين رحمه الله، أن يحققوا أعظم الإنجازات، والتي ما كان يمكن تحقيقها وإنجازها إلا بالإرادة والعزيمة، والانتماء والثقة بالمستقبل وبقدرة الإنسان الأردني على العطاء والإنجاز

وفي هذه المناسبة العزيرة والغالية، أتوجه بالتهنئة والمباركة وبتحية الاعتزاز والتقدير لكل مواطن ومواطنة في هذا البلد، في البادية، والقرى والمخيمات والمدن، والتحية الخاصة للنشأامي والنشأميات أبناء القوات المسلحة، والأجهزة الأمنية الذين بذروا دماءهم وأرواحهم للدفاع عن هذا الوطن وحماية استقلاله ومسيرته وإنجازاته

والاستقلال يا إخوان ليس مجرد مناسبة نحتفل فيها في يوم من السنة، وإنما هو حالة مستمرة من العطاء والبناء والاعتماد على الذات، لتعزيز الاستقلال وبناء المستقبل الذي يليق بأهل العزم والإرادة من الأردنيين الأحرار

وهذا المستقبل ليس مسؤولية شخص أو مجموعة من أبناء هذا الوطن، وإنما مسؤولية الجميع، كل واحد من الموقع الذي هو فيه، العامل والمزارع والموظف والطالب والجندي والأم التي تربي أطفالها على الانتماء ومحبة هذا الوطن

والمسؤولية الكبرى هي مسؤولية الشباب لأنهم، الأقدر على التغيير والأقدر على تحقيق الإنجاز. وبالمقابل الشباب لهم حق علينا، حق في التعليم والتدريب والتأهيل حتى يتمكنوا من مواجهة كل التحديات وبناء المستقبل الذي نريد والذي هو أمانة في أعناق الشباب

،الإخوة والأخوات الأعزاء

كل واحد منا يعرف ويعتز بأن هذا الوطن نشأ وتأسس على رسالة الثورة العربية التي قادها الشريف الحسين بن علي لتحرير الأمة وتوحيدها، ولذلك سيطل الأردن بعون الله، الأردن العربي المسلم، المنتمي لأمتة العربية والإسلامية، والحريص على النهوض بواجبه القومي والديني تجاه كل القضايا العربية والإسلامية ولن نقبل تحت أي ظرف من الظروف أن تكون علاقتنا بأي بلد أو جهة، على حساب علاقتنا بأمتنا العربية أو الإسلامية، وانتساب هذا الوطن إلى

الثورة العربية، وانتساب قيادته إلى الدوحة النبوية الشريفة يفرض علينا أن نكون أول من يتصدى للدفاع عن الإسلام والعرب والمسلمين

ونحن عندما نقول الأردن أولاً، فالمقصود هو أن نبدأ باستكمال بناء الأردن القوي المنيع حتى يكون قادراً على تقديم الدعم والمساعدة للأشقاء العرب سواء في فلسطين أو في العراق أو في أي بلد عربي آخر، وليس التخلي عن واجبنا تجاه أمتنا أو قضاياها العادلة، كما يظن قصار النظر، وقد كان الأردن وسيبقى مونلاً لكل العرب الأحرار لذلك فالأردن أولاً والأردن دائماً والأردن في كل الظروف والأحوال

والركيزة الأساسية في قوة الأردن هي الحفاظ على الوحدة الوطنية والتكامل والتماسك بين أبناء الأسرة الأردنية الواحدة وتحقيق التنمية الشاملة التي تعزز قوة الأردن وتمكنه من تقديم الدعم والإسناد للأشقاء العرب والقضايا العربية وفي مقدمتها القضية الفلسطينية وقضية الشعب العراقي

والأردن يا إخوان لا يمكن أن ينسى وحدة الدم والهدف والمصير مع الأشقاء الفلسطينيين، ولا يمكن أن ننسى دماء شهدائنا على أسوار القدس وفي باحة المسجد الأقصى الشريف، ولن نتخلى في أي يوم من الأيام ولا تحت أي ظرف من الظروف عن تقديم كل أشكال الدعم والمساعدة للأشقاء الفلسطينيين، حتى يصلوا إلى حقوقهم وتقوم الدولة الفلسطينية المستقلة على الأرض الفلسطينية

،الإخوة الأعزاء

منذ اليوم الأول الذي تشرفت فيه بأمانة المسؤولية، وأنا أشعر وأقدر معاناة وهموم كل مواطن ومواطنة في هذا البلد، وأعرف أن سبب هذه المعاناة هو الظروف الاقتصادية الصعبة وغلاء الأسعار وغيرها من المشاكل التي يجب أن نتغلب عليها وبأسرع وقت ممكن، ومثلما ترون، فإننا نعمل بالليل والنهار، ونسافر من بلد إلى آخر، حتى نستعيد من علاقاتنا بالعالم من حولنا وتوظيف هذه العلاقات لخدمة بلدنا. كما إنني أتابع شخصياً كل الأمور حتى نتمكن من التغلب على هذه المشاكل ونرفع مستوى معيشة المواطن

والحمد لله أنجزنا الكثير خلال السبع سنوات الماضية سواء على صعيد التنمية الاقتصادية والاجتماعية، أو على صعيد التنمية السياسية وتعزيز مسيرتنا الديمقراطية، لكن بصراحة الطريق أمامنا ما زال طويلاً، ويجب أن نعمل كلنا بروح الفريق الواحد المنتمي للوطن والوائق بنفسه والمستقبل المشرق بإذن الله

ونريد أن نعتمد على أنفسنا يا إخوان، وإذا لم نساعد بعضنا، ونكون يداً واحدة وقلباً واحداً وهدفاً واحداً، لن يساعدنا أحد ولن نستطيع أن نتغلب على مشاكلنا، لذلك يا إخوان الأمر يحتاج إلى الصبر والتضحية، وصبرنا على حالنا أهون وأكرم من صبر الناس علينا، ولسنا بحاجة إلى جميلة أحد

أما الإشاعات والتشكيك بسلامة المسيرة وبقدرة هذا الوطن على مواجهة التحديات والظروف الدولية والإقليمية من حولنا، فهذا كلام الذين لا يحبون هذا الوطن ولا يريدون له الخير، وهذا الأردن يا إخوان أقوى من كل التحديات وأقوى من كل الظروف وبهمتكم وبعزيمتكم سيظل الأردن أولاً، والأردن دائماً المثل والنموذج

واسمحوا لي بهذه المناسبة أن أقدم لإخواني وأخواتي العاملين في القوات المسلحة والأجهزة الأمنية والموظفين المدنيين والمتقاعدين عيديه بسيطة بهذه المناسبة

ومرة ثانية يا إخوان تحية الاعتزاز والتقدير لكل مواطن ومواطنة في هذا البلد وكل عام وأنتم بخير والأردن العزيز ال

بسم الله الرحمن الرحيم

،الإخوة الخريجين الأعزاء

،الإخوة الحضور الكرام

،الله يعطيكم العافية

واسمحوا لي في هذا اليوم السعيد أن أتوجه بتحية الإعتزاز والتهنئة والمباركة للإخوة الخريجين الذين إنتظروا هذا اليوم بفارغ الصبر، ولأهلهم وعائلاتهم، للأُم والأب الذين صبروا وضحوا، وربما حرموا أنفسهم من أشياء كثيرة من أجل تعليم أبنائهم وتقديمهم هدية عزيزة وغالية لهذا الوطن العزيز الغالي

وتحية الشكر والتقدير والعرفان للمدرسين وكوادر هذه الجامعة، التي في كل سنة تقدم للوطن كوكبة من الفرسان النشامى الذين ندروا حياتهم للدفاع عن هذا الوطن وحماية حدوده ومسيرته وإنجازاته

ومبروك للإخوة في هذه الجامعة بمناسبة مرور 25 سنة على تأسيسها

،الإخوة الخريجين الأعزاء

إعتباراً من هذا اليوم، سيكون لكم شرف الخدمة الفعلية كضباط في الجيش العربي والأجهزة الأمنية، وهذا شرف نعتز ونفتخر به، ومسؤولية كبيرة وواجب وطني مقدس، لا بد من القيام به وبمنتهى الكفاءة والانتماء، وأريد أن نتذكروا دائماً إنكم خريجو جامعة مؤتة، هذا الاسم التاريخي الكبير الذي يذكرنا بالفتوحات الإسلامية، وبأمجاد العرب والمسلمين، وبالمعركة التي كانت وما زالت الرمز الكبير لكل معاني الشجاعة والبطولة والتضحية في سبيل العقيدة والحق والإيمان

وفي كل شبر من هذه الأرض الطاهرة التي إنتم عليها الآن، كانت هناك قصة بطولة، وكل حفنة من تراب هذه الأرض مجبولة بدم المجاهدين والصحابه الذين استشهدوا عليها، زيد بن حارثة وعبد الله بن رواحه وشهيد آل البيت جعفر بن أبي طالب. وهذه أضرحتهم ما زالت مزارات ومنازل للتضحية والبطولة، ونحن كلنا يجب أن نكون الأحفاد الأوفياء لهؤلاء الأجداد والمجاهدين العظام

وأريد أن نتذكروا أيضاً أن الشعار الذي على جبين كل واحد منكم، مكتوب عليه الجيش العربي، لأن هذا الجيش هو الوريث لجيش الثورة العربية، ولذلك سيظل المخلص والوفي لمبادئ هذه الثورة ورسالتها العظيمة، سواء في الدفاع عن الأرض العربية، أو في حماية المدنيين الأبرياء من ضحايا الحروب، أو في الحفاظ على الأمن والسلام في أي مكان من هذا العالم

،الإخوة والأخوات الأعزاء

هذه المنطقة من حولنا تمر بأصعب الظروف وأسوأ المستجدات، فالأوضاع المتفجرة في الضفة الغربية، وفي العراق والخلاف بين إيران والولايات المتحدة، كلها تهدد الأمن والاستقرار. ومن الواضح أن هناك جهات ودول تسعى للإستفادة من هذه الأوضاع، منها من تسعى لتسوية مشاكلها على حساب دول الجوار، ومنها من تسعى إلى تفجير الوضع ونشر الفوضى والدمار في أكثر من مكان، لتعزيز نفوذها وسيطرتها على هذه المنطقة بكاملها. لذلك يجب أن نكون على أعلى درجات الوعي والإستعداد لمواجهة أسوأ الاحتمالات والدفاع عن بلدنا ومصالحنا الوطنية

ويجب علينا كلنا، الأسرة الأردنية الواحدة الكبيرة من شتى المنابت والأصول، وبغض النظر عن الاختلافات السياسية أو الفكرية أو المصالح الضيقة، أن نكون يدا واحدة وقلبا واحدا وصفا واحدا في مواجهة هذه التحديات والأخطار التي تحيط بهذا الوطن من معظم الجهات، ونريد أن يعرف القريب والبعيد أن الأردن أولاً هو ليس مجرد شعار وإنما مبدأ راسخ في ضميرنا، ولا بد من التعبير عنه بالعمل والسلوك والانتماء الحقيقي لهذا الوطن

وإذا كان هناك من يعتقد أن من الممكن تسوية القضية الفلسطينية على حساب الأردن، فيجب ان يعرف أن الأردن لن يكون وطناً بديلاً لأحد وأن وطن الفلسطينيين ودولتهم يجب أن تكون على الأرض الفلسطينية، وليس في أي مكان آخر

وإذا كان الأردن يفتح أبوابه لكل الأشقاء العرب، ويحرص على أن يكون الملاذ لكل عربي مظلوم، فهذا لا يعني أن نتهاون أو نتسامح مع أي جهة تحاول العبث بأمن هذا البلد أو استقراره، فالأردن أولاً ومصلحة الأردن فوق كل المصالح والإعتبارات

ونحن نعرف أن هناك من يحاول الإستقواء ببعض الدول، للإساءة لهذا البلد أو تخريب العلاقة بين الشعبين الشقيقين الأردني والفلسطيني. ولابد من أن يعرف هؤلاء ومن يقف وراءهم، أن العلاقة الأردنية الفلسطينية علاقته تاريخية مقدسة، وأن الأردن سيظل كما كان على الدوام الشقيق الأقرب والشقيق الداعم والمساند بكل إمكانياته للشعب الفلسطيني حتى تقوم الدولة الفلسطينية وعلى الأرض الفلسطينية.

،الإخوة الضباط الأعزاء

،الإخوة الحضور الكرام

مرة ثانية، أطيب التهاني والمباركة للجميع ومبروك لهذا الوطن بهذه الكوكبة من الضباط الشباب الذين نعتز ونفتخر بهم، وبكل الشباب الأردنيين في كل مواقعهم لأنهم حاضرون هذا الوطن ومستقبله المشرق بإذن الله

وأنا متأكد أن النشامي والنشاميات من أبناء وبنات هذا الوطن قادرون على مواجهة كل التحديات بالإرادة والعزيمة والقناعة بأن الأردن أولاً والأردن حاضراً ومستقبلاً والأردن في كل الظروف والأحوال

،والله يعطيكم العافية

والسلام عليكم ورحمة الله وبركاته

ألقى الخطاب نيابة عن جلالة سمو الأمير غازي بن محمد، المستشار الخاص والمبعوث الشخصي لجلالة الملك  
بسم الله الرحمن الرحيم

،السلام عليكم ورحمة الله وبركاته

،سمو الأمير الحسن بن طلال

،المشاركون الأفاضل

يسعدني أن أرحب بهذه النخبة المتميزة من العلماء والباحثين المشاركين في هذا التجمع العالمي الثاني لدراسات الشرق الأوسط. إنها المرة الأولى التي نقوم فيها في الأردن، وفي البلدان العربية كافة، باستضافة هذا التجمع، ونحن نشعر بالفخر والاعتزاز بصورة خاصة كونه أكبر تجمع من نوعه يعقد في منطقة الشرق الأوسط

لقد جئتم لمناقشة العديد من القضايا الهامة ذات العلاقة بهذه المنطقة وما يتجاوزها. إن الفرص والمحددات التي يُشكلها التاريخ، والجغرافيا، والسياسات السائدة، كلها مناحٍ ستقضون الأيام القليلة القادمة وأنتم تتأملون فيها. وستوفر النتائج التي ستتوصلون إليها وتوصياتكم، دون شك، مشورة ومعلومات هامة لأولئك الذين يعيشون في هذه المنطقة، من الذين عقدوا العزم على مواصلة العمل لتحقيق السلام، والتسامح، والتنمية. ونحن في الأردن نقود هذا الجمع الساعي من أجل تحقيق السلام. ونعمل مع شركاء آخرين لنضمن أن الدروس المستفادة من الماضي هي خطة أولية لبناء مستقبل أفضل، من أجل شعبنا، ومن أجل الإنسانية جمعاء أيضاً

،أصدقائي

وقبل ذلك كله، فقد وفدتكم إلى هذه الأرض المباركة سعياً وراء المعرفة. إن هذا الهدف الأنبل حظي دائماً بالأولوية القصوى لدينا. والمعرفة بالفعل هي المضمون الذي تشتمل عليه أول سورة أوحى بها في القرآن الكريم

1- إقرأ باسم ربك الذي خلق. خلق الإنسان من علق. إقرأ وربك الأكرم. الذي علم بالقلم. علم الإنسان ما لم يعلم { (العلق) 5).

كما يقول الله تعالى في القرآن الكريم

(9: قل هل يستوي الذين يعلمون والذين لا يعلمون) (الزمر)

وورد في آية أخرى في الكتاب العزيز

(114: وقل رب زدني علماً) (طه)

إن أرفع أنواع المعرفة بالطبع، هي المعرفة بالله، معرفة صفاته وسننه، ومعرفة العلوم الدينية. ولكننا أيضاً نسعى للحصول على معرفة العقل، معرفة المنطق والعلم، فهذه المعرفة هي التي شكلت العلامة المميزة للحضارة الإسلامية، بما قدمته من إسهامات أساسية هامة للعالم في مختلف الفروع والحقول، بما فيها: الرياضيات، والجبر، والفلك، والطب، والقانون، والتاريخ، وعلم الأحياء، والكيمياء، والصيدلة، والبصريات، والزراعة، وفن العمارة، والدراسات الدينية، والفلسفة، والموسيقى، وعلم الاجتماع.

المشاركون الأفاضل،

في هذه المجالات وفي غيرها، تساعد المعرفة الخبيرة مجتمعاتنا على اتخاذ قرارات ناجحة تستند إلى المعلومات، حول السياسات والموارد. وهذه المعرفة تعد أساسية ومصدر للقوة. وربما كان هذا أحد الأسباب الذي جعل من التعليم والبحث العلمي أولويتين استراتيجيتين للأردن والبلدان الشرق أوسطية الأخرى. وفي الواقع، فإننا في الأردن نعتبر بناء المعرفة جزءاً أساسياً هاماً من أجندة الإصلاح الوطنية لدينا. ومبادراتنا تشمل توفير الدعم للتميز في مجال التعليم... والربط بين الشبكات في الإطار الأكاديمي... وإقامة الشراكات بين القطاعين العام والخاص لزيادة إمكانية الوصول إلى التكنولوجيا والموارد الأخرى. وقد توجهت أنظارنا إلى المجتمع الأكاديمي الأردني نفسه ليقود هذه المسيرة. كما أننا فتحنا أبواب الأردن أمام مجتمع الفكر العالمي. ولم نقتصر على الترحيب بالتجمع العالمي الثاني لدراسات الشرق الأوسط فقط. فبعد عشرة أيام، سيجتمع الحائزون على جائزة نوبل من مختلف أرجاء العالم، للمرة الثانية في البتراء، للعمل معاً من أجل إحداث تغيير إيجابي.

إن بناء مجتمعات تحظى بالقوة وتستند في حركتها إلى المعلومات الصحيحة ليس إلا واحدة من الوسائل التي يمكن للمجتمع الأكاديمي أن يؤثر من خلالها في مستقبل هذه المنطقة. أما الدور الثاني، والذي لا يقل أهمية عن الدور الأول، فهو دور العاملين في مجال الاتصال. فبينكم أساتذة جامعات وكاتبو مقالات... وخبراء تتطلع إليهم الصحافة العالمية ليزودوها بنظراتهم الثاقبة حول ما يدور من أحداث هامة. وبعضكم يشغل عضوية مجالس إدارة المنظمات غير الحكومية. وآخرون منكم يطلب منهم أن يقدموا شهاداتهم أمام البرلمانات، ومشورتهم للحكومات. وليس هناك من هو في وضع أفضل منكم لتصحيح المعلومات الخاطئة والصور النمطية حول العالم العربي... ليس هناك من هو في وضع أفضل منكم لينقل بصورة أفضل حقيقة مجتمعاتنا المتنوعة المعقدة... وليس هناك من يمكنه أن يقوم بأفضل مما تستطيعون القيام به في تركيز انتباه العالم على الاهتمامات التي تعتبر بالغة الأهمية لمستقبلنا.

أصدقائي،

وفي الجانب الديني، سعى الأردن للترويج للمعرفة الحقيقية عن الإسلام، ومعرفة الإسلام الحقيقي. وقد كان هذا هو جوهر رسالة عمان التي أطلقت في شهر تشرين الثاني / نوفمبر 2004، والمؤتمر الإسلامي الدولي الذي عقد في عمان في تموز / يوليو 2005. ويتلخص محتواه في نقاط ثلاث: (1) الاعتراف بصورة واضحة بجميع المذاهب الثمانية في الإسلام، وتعريف من هو المسلم، (2) والتوقف الفعلي عن التكفير بين المسلمين، (3) وتحديد الشروط الموضوعية والذاتية لإصدار الفتاوى، بحيث يتم اجتناب التصريحات والبيانات الجاهلة غير المسؤولة التي تصدر باسم الإسلام. إن هذه النقاط الثلاث التي اشتملت عليها رسالة عمان صادق عليها بالإجماع جميع أعضاء منظمة المؤتمر الإسلامي في مكة المكرمة في كانون الثاني / ديسمبر 2005. وقد أعطى هذا الإجماع التاريخي صوتاً جديداً في جميع أرجاء العالم للإسلام الحنيف المعتدل، الإسلام الذي تطلعنا إليه دائماً؛ وهو الإسلام الذي يتشرف بالانتساب إليه ما يزيد على 95% من مسلمي العالم الذين يبلغ عددهم 1,3 بليون.

سيداتي وسادتي

إن المعرفة الحقيقية والتفهم الحقيقي للإسلام وللأديان والثقافات الأخرى هما المفتاح للسلام والسعادة العالميين. والمعرفة الحقيقية والتفهم الحقيقي للعلوم وفروع المعرفة الأخرى هما المفتاح لازدهار العالم وتنميته

ومن هنا علينا أن نركز، بصورة كاشفة كضوء الليزر، على

بسم الله الرحمن الرحيم

،إخواني الأعزاء

،الله يعطيكم العافية

يسعدني أن أرحب بكم، وأتمنى لكم التوفيق والنجاح، فأهلاً وسهلاً بالجميع، وإن شاء الله يكون هذا اللقاء منتجا ومثمرا، وتكون النتائج على مستوى الطموحات والآمال التي نتطلع إليها

إن التحدي الذي أمامنا، والمطروح في هذا اللقاء، هو تحد كبير، والمطلوب من الجميع، العمل بروح الفريق الواحد، والشعور بالمسؤولية، والواجب الوطني، الذي يدعونا جميعاً للعمل المخلص للوطن، والبعيد عن الأهواء، أو الرغبات الشخصية

ونحن الموجودين هنا، كلنا الأردن، حيث لا يوجد رسميات، ولا مجاملات، ولا أجندات خاصة. والأولويات مثلما تعرفون، تم تحديدها، والإخوان الذين اخترتموهم، في اللقاء السابق، عملوا، خلال الأيام الماضية، بمنتهى الإخلاص، من أجل تحديد مواضيع وأهداف هذه الجلسات، بما يتناسب مع المحاور، التي تم الاتفاق عليها في اللقاء السابق

إنني أبني آمالا كبيرة على هذا الملتقى، وأرجو غدا وبنهاية الملتقى، أن نكون قد توصلنا إلى توافق على الثوابت الوطنية، وعلى رؤية وخطة وطنية واحدة، وأن نتمكن من تحديد الأهداف والأولويات، التي يجب الإسراع في تنفيذها، لحماية الأردن، وصيانة منجزاته، ومواصلة المسيرة، بدون تردد أو تراخ

ومن المهم يا إخوان، أن نتفق جميعاً، على القوانين الضرورية، التي تحمي الوطن، وتسرع الإصلاحات الاقتصادية والسياسية، حتى نتمكن من طرحها على الدورة الاستثنائية المقبلة. وأريد منكم يا إخوان، أن تقترحوا الآلية، التي نضمن من خلالها تنفيذ توصياتكم

وكما تعلمون، فإن الظروف والتحديات التي تواجهنا تحتاج إلى أن نتحرك ونعمل بأقصى طاقاتنا، وبأسرع ما يمكن، وأن يتحمل كل واحد منا المسؤولية، الحكومة، والأعيان، والنواب، والقضاة، والإعلام، والأحزاب، والنقابات، والقطاع الخاص، وكل فرد من أبناء هذا الوطن

بالنسبة للوضع في لبنان يا إخوان، قمنا بجهود كبيرة في الأيام القليلة الماضية، وتمكنا، والحمد لله، من تجاوز الحصار الجوي المفروض على لبنان الشقيق، واليوم وصلت أول طائرة أردنية من سلاح الجو الملكي تحمل مستشفى ميداني ومعدات طبية لمعالجة ضحايا العدوان الإسرائيلي، ومجموعات من سلاح الهندسة لإعادة فتح مطار بيروت

وأنا موجود معكم، خلال هذين اليومين، للمشاركة وتقديم المساعدة التي تحتاجونها، وإن شاء الله غدا نرى النتائج معا، والتي ستكون على مستوى الطموحات

والله يعطيكم العافية



بسم الله الرحمن الرحيم

،الإخوة الأعزاء

،الله يعطيكم العافية

إنني سعيد بالإنجاز الكبير، الذي تم خلال هذين اليومين، وفخور بروح الفريق الواحد، والشعور بالمسؤولية، التي سادت أجواء هذا الملتقى، والتي كانت، سببا أساسيا في نجاحه

ومن البداية، كان الهدف من هذا الملتقى، تحقيق التوافق الوطني على الثوابت، والخروج برؤية شاملة واحدة، وتحديد المحاور، التي يجب أن يكون لها الأولوية، في التنفيذ، والاتفاق على الاستمرار، في العمل الجاد المخلص، لتحقيق هذه الرؤية والهدف، من خلال تنفيذ الأولويات، أولاً بأول

وكما ترون الآن، فإن الأخطار والصراعات، التي حذرت من وقوعها، في كل لقاءاتي السابقة معكم، هي ماثلة أمامكم الآن، على أرض الواقع

وأمام ما يحدث في هذه المنطقة، من صراعات طائفية وإقليمية، فلا بد من تمتين جبهتنا الداخلية، ويجب أن نكون كلنا، يدا واحدة، وقلبا واحدا، في مواجهة هذه الأخطار، التي حذرت منها قبل وقوعها، من خلال الحفاظ، على وحدتنا الوطنية، وجبهتنا الداخلية، التي هي اليوم على رأس أولوياتنا الوطنية، وأريد أن يعرف الجميع، إن انشغالنا بقضايانا الوطنية، لن يكون على حساب التزامنا بمسؤولياتنا القومية والتاريخية، تجاه أشقاءنا في فلسطين ولبنان والعراق، وهذا استمرار طبيعي، لدورنا نحن الهاشميين، عبر التاريخ

لقد عملت يا إخوان، منذ وقت بعيد، وما زلت أعمل، من أجل توحيد الموقف العربي، تجاه هذه التحديات والأخطار، التي تحيط بالامة، من كل جانب، حتى لا يتم تهميش الدور العربي في المنطقة، وبالتالي الحد من قدرتنا جميعاً، على تقديم الدعم والمساندة، للأشقاء في فلسطين والعراق ولبنان

والآن أصبح لدينا تصورا واحدا، لما نريد تحقيقه خلال الفترة القادمة، في المجال السياسي والاقتصادي والاجتماعي

ففي المجال السياسي، هناك اتفاق، على الحفاظ على الوحدة الوطنية، وتعزيز مفهوم الأردن المسلم المعتدل الوسطي، الذي يؤمن بالسلام، والتعايش والتسامح، والتعددية الفكرية والسياسية، والمشاركة في صنع القرار، وبناء مؤسسات المجتمع المدني، والأحزاب الوطنية القادرة على ترسيخ مفهوم الانتماء للوطن، والعمل والإنتاجية والكفاءة

ويجب أن يعرف الجميع، يا إخوان، أن هدفنا واضح، وليس هناك خلاف عليه، لكن الاختلاف يمكن أن يكون على الآليات والوسائل

أما في المجال الاقتصادي والاجتماعي، فهناك اتفاق وإجماع على تلبية طموحات شعبنا في الحياة الحرة الكريمة، وإيجاد الفرص أمام الشباب للعمل والإبداع والإنتاج

والآن يأتي دور العمل والمتابعة والإنجاز

في البداية، الإنجاز مطلوب من الحكومة، وأنا متأكد، أن الحكومة ستباشر في وضع مشاريع القوانين، والسياسات المختلفة، التي اتفقت على أهميتها بهذا الملتقى، ضمن مفهوم الأولويات، وأنا متأكد أيضاً، أن مجلس الأمة، سيتحمل المسؤولية بكفاءة، في إنجاز مشاريع القوانين، التي ستقدمها الحكومة، خلال الدورة الاستثنائية القادمة

أما المؤسسات الأخرى، كالأحزاب والنقابات والإعلام والقطاع الخاص، وسائر مؤسسات المجتمع المدني، فهي أيضاً، سوف تهتدي بهذا الإجماع الوطني، وستقوم بدورها في العمل والإنجاز

وأريد أن أطمئنكم يا إخوان، أن هذه الروح في العمل، ستستمر في المستقبل، وأن الثوابت الوطنية، التي توافقتم عليها، ستكون أساس عملنا جميعاً.

واستجابةً مني لرغبتكم، فقد قررت تشكيل هيئة كلنا الأردن، التي ستضم ممثلين عن أجهزة الدولة، ومؤسسات المجتمع المدني، وسوف تكون هيئة استشارية، لا يتعارض عملها أبداً، مع مؤسساتنا الدستورية، التي أنا أكثر واحد، حريص على حمايتها، وعلى حماية الدستور، وستعمل هذه الهيئة، على تقديم التقارير الدورية، حول سير العمل، وقياس الإنجاز.

وأتمنى على الإخوة النواب، بشكل خاص، باعتبارهم ممثلين لكل أبناء شعبنا، أن ينقلوا للناس الذين انتخبوهم، وأبناء مناطقهم، كل ما يجري هنا، وكل ما نقوم بعمله، سواء كان من أجل شعبنا ووطننا، أو من أجل أمتنا، وأشقائنا العرب.

ومرة ثانية يا إخوان، أنا فخور بما تم إنجازه، وتحقيقه في هذا الملتقى، وبالإجماع الذي تحقق على مواجهة كل أشكال العنف والإرهاب، وعلى التمسك بالإسلام الحقيقي، الذي يدعو إلى السلام والتسامح والرحمة، واحترام إنسانية الإنسان، وحقه في الحياة، والعيش بحرية وكرامة وأمان.

وبارك الله فيكم جميعاً، والله يعطيكم العافية، وإن شاء الله سنبقى على اتصال

بسم الله الرحمن الرحيم

إخواني الشباب

الله يعطيكم العافية، وأهلاً وسهلاً بالجميع، في هذا اللقاء الذي يجتمع فيه هذا العدد الكبير من الشباب الأردني المتميز. وهذا اللقاء هو تأكيد لإيماني وقناعتني الراسخة، بأهمية دور الشباب، وضرورة مشاركتهم في صنع القرار، وبناء الحاضر والمستقبل، الذي يليق بعزيمة الشباب، وطموحاتهم وإمكانياتهم الكبيرة، وحماسهم للتحديث والتطوير.

ولذلك فنحن حريصون على تأمين المستقبل الأفضل للشباب، وأريدكم أن تكونوا متأكدين أن الهموم والمخاوف التي تراود بعضكم حول توفير فرص العمل، وتحقيق العدالة والمساواة وتكافؤ الفرص، هي على رأس أولوياتنا، لأنها قاعدة أساسية في بناء الأردن الأنموذج.

وبعزيمتكم وإرادتكم وتصميمكم سنبنّي الأردن، ونحافظ على منجزاته ونرسخ الديمقراطية والتعددية، التي تغني المسيرة وتساهم في بناء المجتمع الحضاري القادر على التعامل مع الواقع والمستجدات بأسلوب وأدوات عصريه قادرة على مواكبة كل التطورات. وهذا لا يكون إلا في سياق عملية متكاملة وشاملة وضمن أهداف مدروسة. ولذلك فأنا مهتم بمسيرة التعليم في بلدنا، وأريد أن يكون التعليم نوعياً، حتى يتمكن من تأهيل الشباب بأسلوب علمي وتفعيل قدراتهم وطاقتهم لمواجهة تحديات القرن الجديد، فالعالم من حولنا يتغير ولا بد من العمل على إحداث التغيير المطلوب وأنتم فرسان هذا التغيير.

واليوم، أحببت أن ألتقي معكم حتى أستمع إليكم وأطلع على أفكاركم وطموحاتكم لمستقبل الأردن، وكيفية الوصول إلى هذا المستقبل المنشود.

وحتى تكون الصورة واضحة أمامكم، وتكونوا على معرفه بما يجري في هذه المنطقة من أحداث وصراعات، وما يهددها من أخطار، طلبت من بعض المسؤولين أن يضعوكم بصورة التحديات الداخلية والخارجية، سواء على الصعيد السياسي والأمني، أو على الصعيد الاقتصادي والاجتماعي، حتى تفكروا معنا وتشاركونا في وضع الخطط والبرامج لمواجهة هذه التحديات.

والخطوة الأولى لمواجهة التحديات الخارجية أو الداخلية هي الحفاظ على وحدتنا الوطنية وتماسك جبهتنا الداخلية، ووضع مصلحة الأردن فوق كل المصالح والاعتبارات، فالأردن أولاً وكلنا الأردن وكلنا للأردن، ولا نريد أن ننجر وراء الشعارات الفارغة، ولا أن نكون أدوات بأيدي جهات لا تريد الخير لهذا البلد.

وأنتم الشباب المفروض أن تكونوا على أعلى درجات الوعي، والشعور بالمسؤولية، والحفاظ على أمن بلدكم واستقراره ومستقبله.

وخلال الأسابيع الماضية، تم إجراء استطلاع، لمعرفة رأي الشباب حول الأولويات الضرورية لمواجهة التحديات وتعزيز المسيرة، وخرجنا من هذا الاستطلاع بأولويات عديدة في المجالات الاقتصادية والاجتماعية والسياسية

والمطلوب منكم الآن، هو تحديد أهم أولويات المرحلة القادمة، من وجهة نظركم أنتم، وسوف نجتمع مرة ثانية بعد أيام، لمناقشة هذه الأولويات والخروج بتصوير واضح حول رؤية الشباب للإصلاحات الاقتصادية والاجتماعية والسياسية التي ترون إنها ضرورية لمستقبل الأردن

وأقترح على كل مجموعة منكم، أن تختار واحد من بينها حتى يكون حلقة وصل، أو منسق بينها وبين المجموعات الأخرى، خلال الأيام القادمة، للتحضير للقاء القادم

إن اعتزازي بكم كبير وثقتي بكم بلا حدود

والله يعطيكم العافية

بسم الله الرحمن الرحيم

..إخواني الشباب

الله يعطيكم العافية.. وأنا سعيد بالإنجاز الكبير، الذي حققتموه خلال الأيام الماضية والجهود اللي قمتم فيها من أجل تحقيق هذا الإنجاز

ومثلما كنت أتوقع، فإن الأولويات التي قمتم بتحديدوها في هذا الملئقى، هي بالفعل من أهم أولوياتنا الوطنية، والاتفاق عليها سيساعدنا في مواجهة التحديات، ودفع مسيرتنا الوطنية إلى الأمام. وأريدكم أن تتأكدوا، إن برنامج العمل والتوصيات، التي اتفقت عليها في هذا الملئقى، ستكون موضع اهتمامي ومتابعتي، وسأكلف مجلس التواصل لهيئة كلنا الأردن بمتابعة تنفيذها على أرض الواقع

وأنتم الشباب سيكون لكم ممثلين في هذا المجلس، حتى تكونوا شركاء في أعماله، وشركاء في عملية التواصل، التي سيقوم بها المجلس، مع مختلف قطاعات الشباب، في الجامعات ومراكز الشباب، والأندية في كل المحافظات. ومثلما قلت في اللقاء السابق، أنا حريص على الاستماع لأفكار الشباب والحوار معهم، وتعزيز دورهم ومشاركتهم في مسيرة التنمية، وبناء المستقبل، وتحمل المسؤولية تجاه شعبنا ووطننا والأجيال القادمة

وأنا على قناعة راسخة، بأنه إذا أردنا تفعيل دور الشباب ومشاركتهم في مسيرة التنمية، وبناء الحاضر والمستقبل، فلا بد من تأهيلهم وتدريبهم وتوفير فرص العمل لهم، وتمكينهم من استغلال طاقاتهم وإمكانياتهم الكبيرة، وتوظيفها في خدمة وطنهم. وأريدكم أن تتأكدوا، أن هذا الموضوع، بالنسبة إلي هو شغلي الشاغل، وهو في مقدمة الأولويات والتحديات التي لا بد من مواجهتها وبأسرع وقت ممكن

ومرة ثانية يا شباب، لكم كل الشكر والتقدير، على هذه الجهود الطيبة، وعلى هذا الإنجاز الكبير، وأرجو أن تنقلوا تحياتي واعتزازي وتقديري لكل إخوانكم وزملاءكم في الجامعات والأندية ومراكز الشباب، والذين يسمعوننا الآن عبر الإنترنت في كل المحافظات

وبارك الله فيكم

والله يعطيكم العافية

بسم الله الرحمن الرحيم

إخواني وأخواتي الشباب

الله يعطيكم العافية

واسمحوا لي في بداية هذا اللقاء المبارك إن شاء الله أن أرحب بالإخوة الضيوف من القيادات العربية الشابة الذين نعتز بهم ونسعد بوجودهم بيننا إخوة أعزاء وضيوف نكن لهم كل الاحترام والتقدير، واسمحوا لي أن أرحب بشكل خاص بالضيف العزيز الأخ رجب طيب اردوغان رئيس وزراء تركيا الذي بالرغم من مسؤولياته الكبيرة شرفنا في هذا اللقاء بحضوره ومشاركته الكريمة

فأهلا وسهلا بالجميع بين أهلكم وإخوانكم في بلدكم المملكة الأردنية الهاشمية

إنني أعتز بوجودي في مجلس أمناء منظمة القيادات الشابة العربية بجانب الأخوة الذين يمثلون هذه القيادات بما لديهم من رؤى للمستقبل وقدرات وإمكانيات لتحويل التحديات إلى فرص كبيرة تساهم في تقدم المجتمعات العربية وازدهارها

ولقد تابعت الدور الكبير الذي تقوم به هذه المنظمة منذ اليوم الأول لوجودها، وخلال العام الماضي كان التطور الكبير في أداء هذه المنظمة واضحا ومتميزا وخاصة في مجال المبادرات التي بدأت فيها والتي ستعزز دور الشباب العربي وتكوينه الثقافي والفكري ليكون أكثر قدرة على مواجهة التحديات وتحويلها إلى فرص

ومن أهم المبادرات التي تقوم بها هذه المنظمة هي بناء جسور الثقة بين القيادات الشابة العربية ومثيلاتها في آسيا وأوروبا وأمريكا من خلال ترسيخ لغة الحوار وتعزيز آليات التعاون بينها، وهذا دور أساسي، ومن الضروري الاستمرار فيه حتى يشمل أكبر شريحة ممكنة من الشباب العربي

ومثل هذه المبادرة وغيرها من المبادرات التي أطلقتها هذه المنظمة هي في غاية الأهمية، وأنا شخصيا على استعداد لتقديم كل أشكال الدعم لها سواء على الصعيد العربي أو العالمي

وبطبيعة الحال سأتابع وبمنتهى الاهتمام أعمال هذا الملتقى خلال اليومين القادمين والتي ستكون بعون الله في غاية الأهمية

لا أريد أن أطيل عليكم لكنني أردت أن أكون معكم اليوم لأرحب بكم واعبر عن شكري وتقديري لكل أعضاء مجلس أمناء هذه المنظمة ولكل المشاركين في هذا الملتقى

ومرة ثانية أيتها الأخوة أهلا وسهلا بالجميع وأنا على استعداد لتقديم أي دعم أو مساعدة من أجل نجاح هذا الملتقى وأتمنى للجميع التوفيق والنجاح

والسلام عليكم ورحمة الله وبركاته

بسم الله الرحمن الرحيم

،خادم الحرمين الشريفين الملك عبد الله بن عبد العزيز

،أصحاب الجلالة والسيادة والسمو

،ملوك ورؤساء وأمراء الدول العربية

،السلام عليكم ورحمة الله وبركاته وبعد

أود ابتدأ أن أتوجه بعميق الشكر والتقدير إلى خادم الحرمين الشريفين الملك عبد الله بن عبد العزيز، وإلى شعب المملكة العربية السعودية وحكومتها لاستضافتهم لأعمال القمة العربية التاسعة عشر ونتمنّى الجهود الكبيرة التي يبذلها خادم الحرمين الشريفين لتعزيز التضامن العربي وتوحيد كلمة الأمة العربية والإسلامية، كما يسرني أن أتقدم بالشكر لفخامة

الرئيس السوداني المشير عمر البشير على رئاسته للقمّة العربيّة الثامنة عشر، ونجدد الشكر لجامعتنا العربية وأمينها العام السيّد عمرو موسى على الجهود المبذولة من أجل تيسير انعقاد هذه القمة وإنجاحها بإذن الله تعالى

يأتي انعقاد هذه القمة وأمتنا العربية تمر في أخطر مراحل تاريخها المعاصر، فالتحديات والأخطار التي تواجهها وتهدد أمنها وهويتها ومستقبلها ربما تكون أكبر وأخطر من أي تحديات واجهتها في العصر الحديث، فالقضية الفلسطينية وهي قضية العرب المحورية الأولى والسبب الرئيس للصراع في هذه المنطقة ما زالت تراوح مكانها، والشعب الفلسطيني الشقيق ما زال يرزح تحت الاحتلال. والشعب العراقي الشقيق يتعرض أيضاً لأبشع صور العنف والقتل والفتنة بين أبناء الشعب الواحد

إننا اليوم أمام فرصة قد لا يتوفر لنا مثيل لها لاستعادة الحقوق العربية وإقامة الدولة الفلسطينية المستقلة وفقاً لقرارات الشرعية الدولية ومبادرة السلام العربية التي أطلقها خادم الحرمين الشريفين الملك عبد الله بن عبد العزيز في عام 2002، والتي ما زالت تشكل قاعدة مقبولة من الجميع للوصول إلى حل عادل وشامل للصراع العربي الإسرائيلي على جميع المسارات. وهذا يتطلب الالتزام الكامل بدعم وحدة الشعب الفلسطيني وقيادته المسؤولة التي يجب أن تسعى بكل ما تستطيع من أجل ضمان قيام الدولة الفلسطينية المستقلة وعلى أساس المبادرة العربية. وأما العمل الذي لا يستند لقرارات الشرعية الدولية التي يدعمها المجتمع الدولي، فهو عمل يقود بالضرورة إلى نتائج وخيمة تهدد بضياغ الفرصة الأخيرة لإيجاد تسوية عادلة وشاملة للصراع العربي - الإسرائيلي

إن تحقيق السلام بين الدول العربية وإسرائيل لا يمكن الوصول إليه، إلا إذا تعاملت إسرائيل مع المبادرة العربية التي تمثل المشروع العربي الجماعي للسلام بإيجابية وجدية واحترام والالتزام. وهذا هو التحدي الحقيقي للزعماء والقادة في المنطقة والعالم، وبشكل خاص الولايات المتحدة: الدولة الراعية لعملية السلام، والتي ندعوها للإيفاء بما التزم به الرئيس جورج بوش إزاء إقامة دولة فلسطينية مستقلة قابلة للحياة ومتواصلة جغرافياً، وتعيش إلى جانب إسرائيل، وفي هذا الصدد نقدر الدور الذي قامت به الإدارة الأميركية خلال الأسابيع الأخيرة بهدف تحريك العملية السلمية للوصول إلى إقامة الدولة الفلسطينية على التراب الفلسطيني

إن العالم العربي قد أبدى نواياه ورغبته الواضحة لسلام عادل وشامل من خلال المبادرة العربية. وعليه فإننا نناشد الدول الإسلامية الشقيقة تأكيد وتفعيل دعمها لهذه المبادرة ولكافة الجهود المبذولة لتحريك العملية السلمية بهدف إقامة الدولة الفلسطينية

، أصحاب الجلالة والسيادة والسمو

لقد تعاطى الأردن مع قضايا أمته وواقعها من وحي دوره وواجبه التاريخي والقومي في مساندة الأشقاء ومناصرة الإخوة، وما طلبنا إلا رفعة أمتنا واستقرارها وازدهارها، وحرصنا كل الحرص على ترسيخ الاحترام لسيادة كل دولة من دولنا الشقيقة ورفض التدخل في شؤونها أيّاً كان مصدره، وقد كانت القضية الفلسطينية على مدى تاريخها قضيتنا القومية الأولى. وتجسيدا لهذه المبادئ التي نؤمن بها، فقد خاطبنا العالم مؤخراً في الكونغرس الأميركي، وركزنا في خطابنا على ضرورة إيجاد حلّ عادل ودائم للقضية الفلسطينية التي ما زالت تشكل قضية العرب الأولى وجوهر الصراع في المنطقة، وتوجهنا أيضاً بدعاء صريح مضمونه: "أنقذوا الشرق الأوسط... بل والعالم قبل فوات الأوان"، وهذا الإنقاذ يتم برفع الظلم عن الفلسطينيين وتحقيق العدالة لهذا الشعب الشقيق، لينعم بحريته ودولته المستقلة وعاصمتها القدس الشريف. ولنتنعم إسرائيل بالأمن الذي يشكل هاجسها الرئيسي في علاقاتها مع محيطها العربي

لقد أثبتت الأحداث الأخيرة في هذه المنطقة فشل سياسات الحلول الأحادية أو المفروضة على الشعب الفلسطيني، مثلما أثبتت فشل الخيارات العسكرية التي تهدف إلى فرض سياسة الأمر الواقع في مواجهة مقاومة الاحتلال ومحاربة ظاهرة اليأس والتطرف، والتي ولدت نتيجة غياب خيار السلام والشعور بالقهر والظلم لدى شعوب المنطقة. ولذلك، فإن على إسرائيل الاختيار بين: العيش في دوامة حرب دائمة وكراهية متزايدة، وبين القبول بخيار السلام والتعايش الذي أن الأوان للعودة إليه وإعادة الثقة إلى شعوب المنطقة بإمكانية تحقيقه

، أصحاب الجلالة والسيادة والسمو

إن المأساة التي يمر بها العراق الشقيق تستدعي منا موقفاً واحداً وموحداً لدعم المصالحة الوطنية وسيادة العراق الكاملة على ترابه وأمنه واستقراره من خلال التنسيق العربي مع الأشقاء في العراق والمجتمع الدولي حتى تنتصر فيه إرادة الحياة على شبح الموت والخراب. وهذا لا يتأتى إلا بإشراك جميع مكونات الشعب العراقي في العملية السياسية القائمة، ووضع

حد لدوامه العنف ومد يد العون لكل فئات الشعب العراقي ومنع انتشار بذور الفتنة الطائفية وعدم السماح لأي جهة خارجية بالتدخل في شؤونه. وهذا يستدعي أيضا وقفة عربية صريحة مع القيادات العراقية لتتحمل مسؤولياتها الوطنية والتاريخية نحو العراق والعراقيين، ونحو أمتنا العربية والإسلامية

أما لبنان، هذا البلد العربي العزيز، والذي يواجه مخاطر تهدد أمنه واستقراره، فإن الأردن يؤكد من جديد على ضرورة التزام العرب والمجتمع الدولي بتقديم الدعم والمساعدة للحكومة اللبنانية لتتجاوز الآثار التي خلفها العدوان الإسرائيلي على هذا البلد الشقيق، ومن هنا فقد عمل الأردن وسيعمل على استمرار تقديم الدعم لإعادة إعمار لبنان وتمكين الشعب اللبناني من العيش بسلام وأمن واستقرار، وكذلك فإن الأردن يدعو إلى تكثيف الجهود العربية والدولية لدعم حق لبنان في استعادة مزارع شبعاً وتحقيق الأمن والاستقرار في مناخ من الديمقراطية وتعزيز سيادة الدولة اللبنانية واستقلال قرارها السياسي، حتى يعود لبنان متمتعاً بدوره الفاعل والرائد والمتميز في المنطقة. كما نناشد قادة وزعماء لبنان أن يتحملوا مسؤولياتهم لإنقاذ وطنهم وتحقيق السلام والحرية والأمان لجميع اللبنانيين بعيداً عن أي تدخل خارجي

وكذلك هو الحال بالنسبة للسودان والصومال الشقيقين، فالأردن يؤكد حرصه على تحقيق السلام والاستقرار وإيجاد حل عادل لمشكلة دارفور يجنب السودان الشقيق أي تدخل خارجي، كما يدعم ويساند الجهود المبذولة لتعزيز الأمن والاستقرار وترسيخ السلام في الصومال

، أصحاب الجلالة والسيادة والسمو

إننا اليوم أمام خيارين لا ثالث لهما فإما أن نستنهض قوانا ونوحد مواقفنا وسياساتنا لبناء ثقل عربي - إقليمي نواجه به التحديات والأخطار التي تحيط بنا والتي تهدد أمننا ومستقبل أوطاننا، وإما أن نبقي على ما نحن عليه من فرقة وخلافات تضعف موقفنا أمام العالم وتغري الآخرين بالهيمنة على منطقتنا بالتدخل في شؤننا وفرض أجنداتهم علينا، ولذلك فقد آن الأوان لبلورة موقف عربي موحد يحشد طاقاتنا وقدراتنا ومواردنا لخدمة مصالحنا المشتركة ويتصدى لهذه الأخطار والتحديات

إن تحدي الأمن والاستقرار في دولنا يتطلب إدامة التنسيق والتنشاور الأمني والاستراتيجي بينها، بهدف التصدي لأعمال الإرهاب التي تمارسها فئات ضلّت وحادت من أبناء مجتمعاتنا... فئات تظلمت بفتاوى غريبة عن ديننا الحنيف، فأصبحت لا تؤمن إلا بالتنمير والقتل والانتحار وتكفير الآخرين ورفضهم، ولأن خطر هذا الفكر وهذه الفئات يطال كافة أوطاننا ويهدد جميع شعوبنا فإنه لا بد من مقاومة هذا الضلال ومحاصرة هذه الفتنة. والمقاومة تكون بالعمل على بث الأفكار المستنيرة والحقيقية المستمدة من ديننا الحنيف وتقاليدنا العربية الأصيلة، والتي ستسقط وتعزّي الذرائع التي يسوقها الضالّيون، والتي يعتمدون عليها كمبررات في عملياتهم الإرهابية. ولا يخفى على أحد أن التعاون في هذا المجال سيؤدي حتماً لإحقاق الحق ونصر الخير على الشر، ووقف الأذى والفساد وإحباط ما استطعنا من الأعمال الإرهابية

إن رسالة عمان التي أطلقها الأردن والتي مثلت إجماع علماء المذاهب الإسلامية حول: تحديد من هو المسلم، ومن يحق له شرعاً أن يتكلم باسم الإسلام، وجواز التكفير من عدمه، قد شكلت أحد أهم الردود على دعاة الفتنة والفرقة والطائفية. وذلك من خلال إبراز الصورة الحقيقية والمشرقة للإسلام الذي يدعو للاعتدال والتسامح والسلام، والتعايش والانفتاح والحوار، والانخراط والمشاركة في رقي وتقدم المجتمع الإنساني. وهذه الرسالة مثلت أداة أساسية لمواجهة ومعارضة التعاليم الزائفة للمتطرفين، وخطة نحو إعطاء الإسلام المعتدل الصوت والحضور البارز للذين يستحقهما على صعيد العالم

، أصحاب الجلالة والسيادة والسمو

إن الجامعة العربية تمثل الإطار الأهم لعملنا العربي المشترك، وهي أقدم منظمة إقليمية أنشأت، كما أنها أنجزت وثائق واتفاقيات مهمة بشرت بأرقى أشكال التعاون بين دولنا وشعوبنا الشقيقة، وشملت تلك الاتفاقيات مجالات محورية في الشؤون السياسية، مثل تلك التي عالجتها "اتفاقية الدفاع العربي المشترك"، وفي الاقتصاد أيضاً عبر اتفاقيتي "الوحدة الاقتصادية العربية لعام 1955"، و"السوق العربية المشتركة"، اللتان تعدان أقدم الاتفاقيات الاقتصادية لدى التجمعات الإقليمية القائمة. وفي هذا المحور الحيوي، فإننا نؤيد مقترح دولة الكويت الشقيقة والذي طالبت خلاله بعقد قمة عربية اقتصادية متخصصة. وقد حرصنا في الأردن على زيادة وتعزيز التجارة العربية البينية والنوعية، ونحن على يقين بأن الوقت قد حان للحديث عن أطر أنضج وأرقى للتعاون الاقتصادي العربي، وتمثل هذه القمة العربية المقترحة؛ الاقتصادية المتخصصة أفضل أرضية لمناقشة هذه الأطر ومن ثم تفعيلها. وبالإضافة إلى الاتفاقيات المشار إليها يوجد اتفاقيات مشابهة في مجالات الثقافة والعلوم والإعلام والسياحة والنقل والاتصالات والأمن تشكل نواة للعمل العربي المشترك الحقيقي والفاعل والقابل للتطوير والبناء عليه إن شاء الله وإن سعينا من بعد

وبالرغم من هذه الاتفاقيات والأطر النّاطمة إلا أن شعوبنا تتساءل باستمرار: أين التطبيق العملي والنتائج الملموسة لهذه الاتفاقيات وهذه الأطر؟! والجواب معروف، ويعزّ علينا أن نجلد ذاتنا، ولكن لا يجوز لنا ونحن في موقع المسؤولية والقيادة أن نبقى أسرى للأسف والأسى. فالطريق إلى المستقبل المنشود لرفعة أمتنا هو أن نعيد صياغة حياتنا واصطفافاتها بما يكفل وحدة الرأي والموقف، وعلى أسس ضامنة لأمن وسلامة كل دولة، وذلك ليس بجديد ولكن يعوزه التطبيق، فقد تطرقت إليه الاتفاقات المذكورة وعالجته، ولكن ضرورة التطبيق قد باتت اليوم أكثر إلحاحاً خاصة وأن هويتنا وتقاليدنا وقيمنا، أصبحت تواجه وبازدياد أشكالاً متعددة ومعقدة من الأخطار. ولذا نأمل أن نخرج من هذه القمّة بخطوات عملية تقود إلى تطوير وتفعيل عملنا العربيّ المشترك، بما يمنح شعوبنا والأجيال المقبلة الأمل في حياة أفضل، يساهمون خلالها ببناء مجتمعاتهم بأرقى الوسائل وعلوم العصر مع المحافظة على تراثهم الذي تتجسد فيه القيم الإنسانية والأخلاقية

،أصحاب الجلالة والسيادة والسمو

إن العالم من حولنا يتغير ويتقدم للأمام. ونحن كذلك نتطلع للتقدم نحو الأمام. ومن هنا فإن أقطارنا أصبحت بأمس الحاجة إلى الاستخدام السلمي للطاقة النووية، حتى تتمكن من النهوض وبناء مجتمعاتنا وتحديث

حقول العلوم والصناعة والزراعة والصحة فيها. ولهذه الغايات فإننا ندعو إلى إنشاء "مركز عربي سلمي لاستخدام الطّاقة النووية"، مع مواصلة المطالبة بانضمام إسرائيل لاتفاقية منع انتشار الأسلحة النووية وخضوع مفاعلاتها النووية للرقابة الدولية، أسوة بغالبية دول العالم، ما يحقق أمن جميع دول المنطقة ويكفل خلوها من أسلحة الدمار الشامل، التي تشكل تهديداً لمستقبل البشرية جمعاء

وفي الختام.. فإننا نعيد التأكيد على ضرورة أن تخرج هذه القمّة بخطوات عملية تهدف لوضع اللبنة الأساسية لعمل عربي مؤسسي وفاعل، بعيد الثقة بالنظام العربي، وبكرس مصداقيته، ويعزز التضامن باعتباره قاعدة للتعاون والتكامل والتوافق. كما نجدد الشكر للمملكة العربية السعودية ولخادم الحرمين الشريفين على استضافة ورعاية هذه القمّة، وعلى تواصل جهوده ومساهماته الرّامية لتوحيد الصف العربي وتمتين الموقف الإسلامي من خلال الدور الرئيسي الذي تطلّع به المملكة في مجلس التعاون الخليجي ومنظمة المؤتمر الإسلامي

وفقنا الله جميعاً لما فيه خير أمتنا وشعوبنا

،،،والسلام عليكم ورحمة الله وبركاته

بسم الله الرحمن الرحيم

أشكركم جميعاً. ويشرفني أن أنضم إليكم في هذا اليوم. اسمحو لي أن أوجه تحية تقدير خاصة لدولة الدكتور عبدالسلام المجالي لتنظيم هذا الاجتماع

،أصدقائي

إن تجمّعكم هذا هو أحد تلك التجمعات التي لا أجد نفسي مضطراً فيها للتحدث عن مدى الإلحاح في مسألة تحقيق سلام شامل ودائم وعادل. أعتقد أنكم تعرفون الفرصة الهائلة المتاحة لنا الآن بالإضافة الى الاخطار التي قد تنشأ عن الاحداث الجارية في غزة

ولكنني أود أن أقول كلمات قليلة عن دوركم الهام في هذه اللحظة التاريخية. إن عام 2007 هو مَفْصَلٌ لاتخاذ قرار. فالدول العربية تقف متحدة وراء مبادرة السلام العربية. وهناك إرادة دولية جديدة لحلّ الأزمة. والعملية تَحْطَى بانتباه جديد من القيادات في الجانبين. والقضايا عادت ثانية إلى الصفحة الأولى، بدلاً عن اقتصار بحثها في أعمدة الرأي في الصحف

إن التحدي الآن هو أن نمضي بالعملية قُدماً، وأن نبني الزخم لتحقيق نتائج حقيقية - وأن نقوم بهذا الآن، والفرصة ما زالت متاحة. وإذا ما تركنا الأحداث تنزلق من بين أيدينا، فسنظل ننظر إلى سنوات ملؤها المزيد من العنف والدمار، قبل أن تلوح لنا فرصة أخرى كهذه الفرصة التي أمامنا. إننا بحاجة إلى أن نهض إلى العمل بشجاعة ورؤية وتصميم

إن أفضل قوة لتحقيق هذا تتمثل في الناس في أرجاء مجتمعاتنا، الذين يريدون السلام ويحتاجون إليه. فاستطلاعات الرأي العام تشهد، مرة بعد مرة، أن الناس في كلا الجانبين يريدون تسوية يتم التوصل إليها بالتفاوض، ويريدون أن يروا نهاية للآزمات والدمار، ويريدون أن ينعموا بالفرص التي يتيحها السلام، وبمزاياه. والحاجة إليكم قائمة، لتعطوا جميع هؤلاء الناس صوتاً، ونشر رسالتهم في أرجاء العالم

إن الجماهير التي اختارت السلام تحتاج إلى أن تُشرك في هذه العملية كل أب، وكل أم، ملأت قلوبهما الخشية يوماً ما على طفلها. ويجب على جماهير السلام هذه أن تمكن كل جيل، وخاصة جيل الشباب لدينا، من استعادة مستقبلهم من عوامل الفرقة والعنف التي شهدتها الماضي ومن العنف الذي يتبدى اليوم

كما أن الحاجة قائمة أيضاً إلى قيادتكم لمساعدة الناس في خلق رؤية جديدة ذات مصداقية لمنطقتنا. ذلك أن أعداداً كبيرة من الناس تعرف ما معنى الشعور بالغضب والأسى والحزن. ساعدوهم على أن يتذكروا القاعدة الصلبة التي يقف عليها السلام الناجح المتمثلة بالأمل، والتمكين من بلوغ الغايات، والحس بالفرص الجديدة المتاحة

وأخيراً، فإن الحاجة إلى قيادتكم قائمة كي تبدأوا في إيجاد ذلك الواقع الآن. انني قلق مثلكم جميعاً إزاء أحداث العنف في غزة التي يجب أن تتوقف لمصلحة الشعب الفلسطيني ولمصلحة فلسطين

قبل ثلاثة عشر عاماً، أعلنها والدي المغفور له جلالة الملك الحسين مدوية: " لا لمزيد من الموت؛ لا لمزيد من اليأس؛ لا "توجس بعد اليوم، ولا خوف؛ ولا مكان للشك في ما يحمله كل يوم لنا

إننا لم نصل إلى تحقيق تلك الرؤية بعد، ولكننا قادرون على ذلك. والتاريخ يُبين أن أناساً مثلكم سيُحدثون الفرق. إن العمل الشعبي البعيد عن العنف كان وراء التحول في أرجاء العالم. فقد أزال الجدار الذي كان يقسم أوروبا إلى شطرين، وأنهى الفصل العنصري في الولايات المتحدة الأمريكية

وأنا أعلم أننا نستطيع أيضاً، بمساعدتكم وقف العنف وتحقيق عهد جديد أكثر عدلاً. ويمكن لهذه الأرض أن تخرج من موسم الأزمات. وأحثكم على أن تتسلموا زمام قيادة هذه المسيرة

وشكراً لكم جزيلاً

بسم الله الرحمن الرحيم

،الإخوة والأخوات الأعزاء

أهلاً ومرحباً بكم، وكل عام وأنتم والوطن بألف خير

في هذا اليوم المبارك أتوجه بتحية الفخر والاعتزاز وبالتهنئة والمباركة بهذه المناسبة العزيزة والغالية إلى كل مواطن ومواطنة من الأسرة الأردنية الواحدة الكبيرة، ومن أبناء وأحفاد الرجال المخلصين، الذين بدأوا مسيرة هذا الوطن وقدموا أكبر التضحيات من أجل الاستقلال، وتحقيق الإنجازات الكبيرة، التي شكلت الأساس القوي لبناء الأردن الشامخ، الأردن الذي تجسدت فيه مبادئ ورسالة الثورة العربية الكبرى، التي قادها وضحي في سبيلها بكل ما يملكه وبكل ما يستطيع أبو الثوار وأبو الأحرار الشريف الهاشمي الحسين بن علي طيب الله ثراه. ومن الوفاء لهؤلاء الرجال الثبات على المبادئ والمواقف والرسالة التي ضحوا في سبيلها

وأفضل طريقة للاحتفال بالاستقلال، هي أن نبني على ما بناه الآباء والأجداد، وأن نحقق المزيد من الإنجازات، وأن نستمر برويتنا الواضحة، نحو الأردن القوي المنيع المزدهر، الأردن الذي ينعم فيه أبنائنا وأحفادنا، بالحرية والأمن والعيش الكريم. إن المساهمة في هذه المسيرة، وتحقيق رؤيتنا لأردن المستقبل، هي واجب على كل أبناء وبنات هذا الوطن، كل



واحد من موقعه، فالجميع شركاء في هذه المسيرة، وشركاء في مجتمع العدالة والمساواة وتكافؤ الفرص، ونحن كلنا الأردن وكلنا للأردن.

في الشأن الداخلي، ما زلنا - أيها الإخوة - عند الوعد الذي قطعناه على أنفسنا، وهو تحقيق التنمية الشاملة، ونحن والحمد لله نمضي قدما وبخطى وثيقة، نحو تحقيق فرص الحياة الكريمة للشباب الأردني، وبناء اقتصاد قوي يعتمد على مواردنا البشرية، التي نعمل على تأهيلها وتدريبها. ورؤيتنا في التعليم والتأهيل واضحة كل الوضوح، وبالرغم من كل التحديات والمعوقات، فالإنجاز والحمد لله يتحقق في كل المجالات. وبهمة الأردنيين وعزيمتهم، وبالعامل الجاد المخلص، سنحقق كل طموحاتنا بإذن الله. صحيح أن مواردنا الطبيعية محدودة، والظروف الإقليمية من حولنا يمكن أن تؤثر على أوضاعنا، لكن لا نريد أن تكون هذه الظروف، سببا للتردد أو التراجع، ولا مبررا للتراخي أو التقصير لا سمح الله.

أما مسيرتنا الديمقراطية، فنحن حريصون كل الحرص على ترسيخها وتعميقها، وتفعيل دور مؤسسات المجتمع المدني، واحترام مبدأ التعددية، في إطار الوحدة الوطنية، التي يجب أن تبقى فوق كل الاختلافات. فالتعددية والتنوع هي روافد بثري المسيرة، وتمكّن المواطن من حرية الاختيار والتعبير.

على أي حال، أماننا الانتخابات البلدية في هذا الصيف، ومن بعد ذلك الانتخابات النيابية، وهذا كما قلت في السابق، تأكيد على التزامنا بأحكام الدستور، وحرصنا على تمكين المواطن من المشاركة في صنع القرار. وهنا اسمحوا لي بالتأكيد مرة أخرى، على أن العمل العام مسؤولية وتكليف، وليس وجاهه أو تشريف، كما أن العمل العام يحتاج إلى المعرفة والخبرة والتضحية بالمصالح الشخصية، من أجل المصلحة الوطنية أو العامة. وبهذا المعنى ستكون الانتخابات القادمة فرصة لكل مواطن في هذا البلد، للتعبير عن المفهوم الحقيقي للمواطنة والانتماء، سواء عندما يرشح المواطن نفسه، أو عندما ينتخب من يمثله في البلدية أو في مجلس النواب.

من حق الوطن على كل مواطن، أن يقوم بواجبه في ممارسة حقه في التصويت والانتخاب. والصوت الانتخابي أمانه، ويجب أن نؤدي الأمانة إلى من يستحقها من الأشخاص المشهود لهم بالأمانة والكفاءة والانتماء. ولا نريد أحدا أن ينخدع بالشعارات البراقة، ولا بالوعود التي ليس لها أول وليس لها آخر. مهمة النائب - أيها الإخوة - هي الرقابة والتشريع، والنائب هو نائب للوطن كله، وليس لمنطقه أو عشيرة أو حزب. ومن صميم عمل النائب في الرقابة، محاربة الوساطة والمحسوبية، وليس ممارستها أو السكوت عليها. ونحن بحاجة لمجلس نواب يستوعب رؤيتنا للمرحلة القادمة، وحاجتنا للتشريعات الضرورية لهذه المرحلة.

الإخوة والأخوات الأعزاء

منذ اليوم الأول لبداية الصراع العربي الإسرائيلي، كان الأردن الرديف والسند والداعم للأشقاء الفلسطينيين، وقد دفع الأردن ثمن هذا الموقف طيلة العقود الماضية، وتحمل في سبيل القضية الفلسطينية، ما هو فوق طاقاته وإمكاناته. وكان الشريف الحسين بن علي، أول من دفع ثمن موقفه، للدفاع عن عروبة فلسطين، ورفضه للمساومة أو التفريط بأي حق من حقوق الأمة العربية. وبعده دفع الجد المؤسس حياته ثمنا لهذا الموقف. أما الوالد رحمه الله، فالبعيد والقريب يعرف كم تحمل وكم عانى في سبيل هذه القضية. والشعب الأردني كله، وبغض النظر عن المنابت والأصول، تحمل وعانى، وقدم أكبر التضحيات، للدفاع عن القضية الفلسطينية. وكلنا يعرف، أنه لا يوجد مدينة أو قرية أو عشيرة أردنية، إلا وكان منها جندي أو ضابط استشهد أو جرح أو قاتل بشرف وشجاعة، للدفاع عن فلسطين. ومن لم يقاتل منهم في ساحة المعركة، تحمل النتائج والآثار المدمرة للحروب، التي قاتلنا فيها للدفاع عن فلسطين، ودفع ثمن هذه الحروب من تعبهم ومعاناتهم وخبز أطفالهم.

وبالرغم من كل هذه التضحيات، كان الأردن والأردنيون والملوك الهاشميون، يتعرضون للاتهامات الظالمة، والتشكيك في دورهم، وإنكار تضحياتهم وتخوينهم في بعض الأحيان. واليوم، وبعد كل هذه السنين الطويلة، أثبتت الأحداث والتاريخ، أصالة الموقف الأردني، وبدأ العالم والأشقاء العرب يعترفون بهذا الدور المشرف، والتضحيات الكبيرة التي قدمها الأردن: الشعب والقيادة على حد سواء. ونحن لا نقول هذا الكلام، للدفاع عن مواقفنا، ولا من أجل المزايدة على مواقف الآخرين كما يفعل غيرنا، ولا نريد أن نحمل الجميل لأحد، لأن هذا واجبنا، ولا نريد من أحد أن يشكرنا عليه. نحن نقول هذا الكلام، وفي عيد الاستقلال، حتى يتذكر المواطن الأردني دائما أن هذا البلد لم يقصر أبدا، لا تجاه الأمة العربية، ولا تجاه القضية الفلسطينية، وإنه من حق المواطن أن يرفع رأسه، وأن يبقى رأسه دائما مرفوعا.

واليوم نؤكد من جديد، على أن الأردن سيستمر في الدفاع عن الحق العربي في فلسطين، حتى يستعيد الشعب الفلسطيني، كامل حقوقه ويقيم دولته المستقلة على أرضه، وينعم فيها بالحرية والاستقلال والحياة الكريمة. وسياصل الأردن تحركه

السياسي، واستخدام كل المنابر في شتى أنحاء العالم، للدعوة لتحقيق السلام الدائم والشامل، الذي يضمن الحقوق، ويصون الكرامة لأصحابها.

على أي حال، الآن هناك تعاطف دولي، وإرادة سياسية عربية، لتسوية هذه القضية تسوية عادلة، تقوم على حل الدولتين، وهناك المبادرة العربية التي أجمع عليها العرب في قمة بيروت عام 2002، وأكدت عليها قمة الرياض، هذه المبادرة التي تستند إلى قرارات الشرعية الدولية، ولم تفرط بأي من الحقوق العربية، وهذه فرصة حقيقية، لاسترجاع الحقوق الفلسطينية والعربية، وإقامة الدولة الفلسطينية المستقلة. لذلك، لا بد من اغتنام هذه الفرصة، والاستفادة من تعاطف العالم مع معاناة الشعب الفلسطيني، وقناعته بضرورة وضع حد لهذه المعاناة، وترحيبه بالمبادرة العربية للسلام، قبل فوات الأوان، وضياح هذه الفرصة التاريخية، مثل الفرص التي ضاعت في السابق. وعلى هذا الأساس، سنستمر في دعم هذه المبادرة والترويج لها، في كل أوساط المجتمع الدولي والرأي العام الإسرائيلي.

ونحن عندما نتحدث عن القضية الفلسطينية، وندعو العالم إلى الالتزام برفع الظلم عن الشعب الفلسطيني، والضغط على إسرائيل، للقبول بهذه المبادرة، فنحن لا نتحدث بالنيابة عن الفلسطينيين، ولنا بديلا عنهم، ولا أوصياء عليهم، وليس لنا أي هدف، إلا مساعدتهم على استرجاع حقوقهم، وإقامة دولتهم المستقلة على أرضهم وترابهم الفلسطيني. وكما قلت، هذا واجب علينا وعلى كل العرب والمسلمين، فالقضية الفلسطينية هي قضيتنا جميعا، ومعاناة الفلسطينيين هي معاناتنا، وسوف نستمر في جهودنا، لتوحيد كلمة العرب، حتى تكون قوية ومسموعة، ومعبرة عن تطلعات الشعوب العربية وآمالها بتوحيد الصف، وتمتين الجبهة العربية.

،الإخوة والأخوات الأعزاء

منذ البداية، حذرنا من خطورة الصراعات والفتن الطائفية والمذهبية، والعنف والإرهاب، الذي يهدد بتدمير حاضر هذه المنطقة ومستقبلها، وتحويلها إلى ساحة مفتوحة للتدخل والصراع، بين القوى الإقليمية أو الدولية، التي لها أجندات في هذه المنطقة. وعلى هذا الأساس، عملنا وسنستمر في العمل، من أجل ترسيخ قواعد الاعتدال والتسامح والتفاهم والتعايش، التي تمثل رسالة الإسلام السمحة، والتي تجعل منا ( خير أمة أخرجت للناس ). وسوف نستمر أيضا في التصدي للفتن الطائفية والتعصب والتطرف، حتى لا نعطي لأعداء هذه الأمة، الفرصة للعبث بعقيدتها وثقافتها، وتاريخها ومستقبلها. إخواننا في العراق، كل يوم يذهب منهم العشرات وربما المئات ضحايا للعنف والإرهاب والفتنة، ونحن وقفنا وسوف نستمر في الوقوف، إلى جانب الشعب العراقي بكل مكوناته، وبكل ما نستطيع، للتخفيف من معاناته، والمساعدة على إعادة بناء مؤسسات الدولة، وإعادة الأمن والاستقرار لهذا البلد، والشعب الشقيق والعزير علينا جميعا.

،الإخوة والأخوات الأعزاء

في هذا اليوم، في عيد الاستقلال، نتوجه كلنا بالتهنئة الحارة، وبتحية الفخر والاعتزاز، لفرسان الوطن النشامى والنشميات، في الجيش العربي والأجهزة الأمنية، لأنهم رمز الاستقلال ورمز السيادة، ولأنهم العيون الساهرة، على أمن واستقرار هذا الوطن، وحماية مسيرته وإنجازاته. ومني شخصيا تحية لرفاق السلاح، لكل جندي وكل ضابط وضابط صف، في كل خندق، وفي كل معسكر، يؤدي واجب الوطن والشرف والرجولة، على تراب هذا الوطن العزيز.

أما الشباب، فتقتي بهم كبيرة وأملهم ليس له حدود، وأقول لهم في هذا اليوم، أنتم صناع المستقبل، وأنتم فرسان التغيير، وإن تعزيز الاستقلال، وبناء المستقبل، الذي يليق بهذا الوطن وتضحياته، هو واجبكم، وأنتم الأقدر على النهوض بهذا الواجب، ونحن جميعا نعقد عليكم الآمال، ونتطلع إلى اليوم الذي نراكم فيه، قيادات متميزة، في كل مجالات الحياة، وفي المواقع المتقدمة، التي تساهمون من خلالها في صنع القرار وتنفيذه على أرض الواقع. وأتمنى على الشباب أن يكون لهم دور فعال ومؤثر، في الانتخابات القادمة، دور يعكس وعيهم وثقافتهم، في اختيار من يمثل تطلعاتهم ورؤيتهم للمستقبل.

وأخيرا إخواني وأخواتي أبناء الأسرة الأردنية الواحدة، الشعب الأردني الخير المعطاء، أتوجه إليكم جميعا بأطيب التهاني . بهذه المناسبة العظيمة، وكل عام وأنتم جميعا والأردن العزيز الغالي بألف خير

والسلام عليكم ورحمة الله وبركاته

بسم الله الرحمن الرحيم

،الإخوة الخريجون الأعزاء

،الإخوة الحضور الكرام

،السلام عليكم ورحمة الله وبركاته

اسمحوا لي في هذا اليوم المبارك والسعيد، الذي نحتفل فيه بتخريج الفوج العشرين من كتيبة عبدالله بن رواحه، أن أتوجه بتحية الاعتزاز لكل واحد من النشامى الخريجين وبالتهنئة والمباركة لهم وإلى أهلهم وأقربائهم، الذين جاءوا من كل أرجاء الأردن العزيز للمشاركة في هذا الاحتفال. ومبروك للنشامى الخريجين وبارك للوطن بهم. هؤلاء الذين نذروا حياتهم وأعدوا أنفسهم الإعداد الجيد للدفاع عن هذا الحمى العربي الأصيل وحماية مسيرته وإنجازاته

وأود أن أؤكد للنشامى الخريجين أن هذا الوطن تأسس وبناءه الآباء والأجداد على مبادئ ورسالة الثورة العربية الكبرى، التي قادها الشريف الحسين بن علي من أجل تحرير الأمة وتوحيدها وترسيخ مبادئ الحرية والوحدة والعدالة. وهذا الجيش الذي نعزز كلنا بشرف الخدمة فيه هو الجيش العربي، الوريث الشرعي والمخلص الوفي لمبادئ هذه الثورة ورسالتها العظيمة... الجيش العربي الذي يلبي دائما نداء الواجب في الدفاع عن حقوق الأمة وكرامتها وعن كل شبر من الأرض العربية وخاصة أرض فلسطين... إن معارك الشرف والبطولة التي خاضها آباءكم وأجدادكم من جنود وضباط الجيش العربي في فلسطين والطررون وباب الواد والكرامة وعلى أسوار القدس وقدموا فيها قوافل الشهداء يجب أن تكون مصدر فخر واعتزاز ومثلا أعلى لكل واحد منكم

إن الأحداث والمستجدات التي تمر بها المنطقة من حولنا تستدعي المزيد من الوعي والاستعداد للتصدي لكل ما يمكن أن يؤثر على أوضاعنا، أو يهدد الأمن والاستقرار في بلدنا الذي نحمد الله تعالى أنه بخير... وأن مسيرتنا تحقق أهدافها. وبهمة وعزيمة النشامى الأردنيين والأردنيات، سيبقى الأردن العزيز واحة للأمن والاستقرار ومثالا في التقدم والقدرة على مواجهة التحديات وتحقيق الإنجازات

،الإخوة الخريجون

ابتداء من هذا اليوم أنتم ضباط في الجيش العربي، هذا الجيش الذي يعرف البعيد والقريب، أنه مثال في الشجاعة والانضباط والكفاءة والإخلاص لشرف الجندية والانتماء للوطن... وأعلموا أن رسالتكم في هذه الحياة هي الدفاع عن وطنكم وحماية منجزاته والمساهمة في مسيرة البناء والتحديث والتنمية، التي تعزز قوة هذا الوطن ومكانته وأمنه واستقراره. وأنا واثق أنكم وإخوانكم وزملائكم في الجيش العربي والأجهزة الأمنية على مستوى المسؤولية، وحمل راية الوطن ورسالته

مرة ثانية أيها الشباب لكم أطيب التهاني... ومبروك لكم ولأهلكم... وكل الشكر والتقدير لجامعة مؤتة: الأسرة التدريسية والإدارية والتدريبية على جهودهم الطيبة التي تقدم في كل عام للوطن كوكبة من النشامى جنود الوطن الضباط المتميزين.. وبإذن الله ستظل المعنويات عاليا والراية مرفوعة

والله يعطيكم العافية

،إخواني الشباب

،كل عام وأنتم بخير والله يعطيكم العافية

إن هذا اللقاء هو تأكيد على التزامنا بدعم مبادرة شباب "كلنا الأردن"، التي كان الهدف منها تمكين الشباب من المشاركة الفعلية في بناء الوطن

وقد تابعت بمنتهى الاهتمام كل النشاطات والمبادرات التي قامت بها هيئة شباب "كلنا الأردن"، خاصة مبادرات دعم الإبداع والتميز الشبابي، والشراكة مع المجتمعات المحلية، وتوفير فرص التدريب للشباب في مختلف المحافظات، وإنشاء النوافذ التمويلية لدعم الإبداع والتميز والمشاريع الريادية.

واليوم، نشعر بالفخر والاعتزاز بالإنجازات التي حققتها في مرحلة التأسيس، والتي وضعت خلالها الإطار العام لعمل الهيئة وآليات التواصل مع الشباب، من أجل إطلاق العديد من المبادرات والأفكار، وتحويلها إلى منجزات عملية يلمس الشباب والمجتمع ثمارها على أرض الواقع.

ومن خلال ما شاهدت وسمعت من حوارات ونقاشات في إطار هذا المنتدى الوطني تعززت قناعاتي بأن الشباب الأردني غنيّ بالقيادات الواعدة.

إخواني الشباب

نريد منكم خلال الفترة القادمة الاستمرار بالعمل بنفس الجدّة والعزم الأردني الأصيل، وبالتركيز على دور الشباب في كل ميادين البناء والتطوير حتى يظل الأردن مثلاً في القدرة على التميز والإبداع وتحقيق الإنجاز.

أما التحدي الأكبر الذي يقف أمامكم في المرحلة القادمة، فهو مؤسسة دور الشباب في العديد من المجالات، ومن أهمها بناء شراكه حقيقية مع المؤسسات السياسية - مثل الحكومة والبرلمان ومؤسسات المجتمع المدني - من أجل صقل مهارات الشباب، وإعداد قيادات فاعلة وقادرة على المبادرة وصناعة الحاضر والمستقبل، وفي هذا المجال قمنا خلال المرحلة الماضية بإشراك الشباب في عدد من زياراتي للخارج وفي عدد من جولاتي الميدانية المحلية، وهذه تجربة نريد تعميمها على أكبر عدد ممكن من الشباب.

ومن الناحية الاجتماعية، فلابدّ من العمل على ترسيخ ثقافة العمل التطوعي لدى شبابنا من خلال تحديد (أيام للعمل التطوعي الشبابي) في المؤسسات الخدمية التي تحتاج إلى الدعم والمساندة من أجل ترسيخ روح المبادرة والتطوع بين الشباب وتعزيز علاقتهم بمجتمعهم وتفاعلهم المباشر مع حاجاته ومشكلاته.

ومن أهم المهمات أيضاً التواصل الدائم مع الشباب في كل المحافظات من أجل التوعية والتدريب والإرشاد في مجال الاختيارات المهنية، وذلك من خلال إيجاد قنوات مؤسسية للتواصل بين الشباب والقطاع الخاص لتوفير فرص العمل للشباب والشابات عبر مكاتب الإرشاد المهني في كافة الجامعات.

مرةً أخرى أيها الشباب، كل الشكر والتقدير على جهودكم الطيبة. ونرجو أن تنقلوا تحياتنا واعتزازنا لكل إخوانكم وأخوانكم في كل مكان من هذا الوطن. ونريدكم أن تكونوا على ثقة بأن دعمنا للشباب بلا حدود وهو من ثوابت نهجنا السياسي وقناعتنا بأهمية دور الشباب في بناء وطنهم ومستقبله.

وبارك الله فيكم،

والله يعطيكم العافية

كلمة جلالة الملك عبدالله الثاني خلال حفل إفطار القوات المسلحة الأردنية  
الأردن للزرقاء

2007 تشرين الأول/أكتوبر 03

بسم الله الرحمن الرحيم

إخواني النشامي،

أسعد الله مساعكم ... ويعطيكم العافية

اليوم أنا هنا معكم لأطمئن على أحوالكم، وأعبر لكم عن اعتزازي بكل واحد منكم، وبشرف الخدمة في هذا الجيش.. وبالسنوات الطويلة التي عشتها معكم وبينكم في كل كتبيته، وكل معسكر وكل ميدان من ميادين الشرف والرجولة، التي أنتم عنوان لها، وأنتم دائماً وأبداً، رمز لكل معاني البطولة والتضحية والانتماء

وأريد أن تكونوا على ثقة، أنكم دائماً في ضميري ووجداني، وأني حريص على أن أكون معكم وبينكم، في كل يوم، وفي كل مناسبة. وعندما لا أكون معكم، أكون مشغولاً بالعمل من أجلكم ومن أجل أهلكم وإخوانكم، الشعب الأردني الذي يستحق منا كلنا، أن نعمل بكل ما نستطيع من أجله، واستكمال بناء هذا الوطن، الذي نفتديه بالروح والدم وبكل ما نملك

أما أنتم رفاق السلاح، نشامى الجيش العربي، والأجهزة الأمنية، فأنتم موضع الفخر والاعتزاز والاحترام والتقدير، وسمعتكم بترفع الرأس في كل العالم.. وحتى يبقى الجيش العربي والأجهزة الأمنية الأردنية، كما كانت على الدوام، مثالا في الكفاءة والافتداز، والنهوض بالواجب، والقيام بمسؤولياتها العظيمة، فإننا نسعى باستمرار، لتزويدها بأحدث الأسلحة، وتنويع مصادر السلاح... وبعض هذه الأسلحة الجديدة وصلت إليكم، وهناك خطط شاملة للتحديث والتطوير في كل وحداتنا وتشكيلاتنا العسكرية، سواء على صعيد التسليح أو الإدارة أو التدريب... وهناك أيضا خطط ومشاريع، لرفع مستوى معيشة أسر وعائلات أبناء وبنات القوات المسلحة، والأجهزة الأمنية، سواء العاملين أو المتقاعدين أو الشهداء، وبخاصة في مجال توفير السكن الكريم لهم ولعائلاتهم.. بالإضافة إلى الخطط والمشاريع التي ستقوم بها القوات المسلحة، في مجالات التدريب والتأهيل للشباب الأردني، للحد من مشكلات الفقر والبطالة في كل المحافظات

،إخواني النشامى

وأود بهذه المناسبة أن أتوجه بتحية الفخر والاعتزاز إلى إخوانكم وزملائكم في قوات حفظ السلام الدولية، الذين يرفعون علم الأردن، واسم الأردن، في شتى أنحاء العالم، فكل عام وهم والوطن بألف خير

إنني أعلم أن التحديات والأخطار من حولنا كبيرة، لذلك نريد أن نكون على أعلى درجات الاستعداد، لمواجهة كل هذه التحديات، وكل هذه الأخطار، ويجب أن نحمي وطننا... ويجب أن نحافظ على الأمن والاستقرار، فهما النعمة الكبرى في هذا البلد

وانتم تعرفون أن هذا البلد، كان وما يزال، يعيش ويتقدم ويحقق أعظم الإنجازات، بالرغم من كل التحديات والأخطار، التي تحيط به، من كل الجهات، لذلك أريد أن تبقى المعنويات عالية... وأريد أن تكونوا متأكدين أن هذا البلد، بعزيمة أبنائه وبناته، وبهمة النشامى وتضحياتهم، سيبقى دوما أقوى من كل التحديات، وأقوى من كل الظروف... والراية مرفوعة بعون الله

مره ثانيه، تحية الفخر والاعتزاز، وأجمل التهاني بهذا الشهر الفضيل، وبالعيد السعيد، لكل جندي وضابط في قواتنا المسلحة والأجهزة الأمنية

وكل عام وانتم والوطن بألف خير

جلالة الملك عبدالله الثاني يطلق المبادرة الوطنية للاسكان

الأردن/البحر الميت

2008 شباط/فبراير 26

بسم الله الرحمن الرحيم

،الإخوة والأخوات الأعزّاء

،الله يعطيكم العافية

أحببت أن ألتقي معكم اليوم حتّى أضعكم في صورة بعض خططنا وبرامجنا لمواجهة بعض التحديات والصعوبات التي يعاني منها أبناء هذا الوطن العزيز. فقناعتي دائماً هي أن المسؤولية تجاه حاضر هذا الوطن ومستقبله ومواجهة التحديات التي تواجه مسيرتنا هي مسؤولية مشتركة. فكل مواطن وكل مواطنة في هذا البلد يتحمل جزءاً من هذه المسؤولية

ومن خلال خدمتي في الجيش العربي، ومن خلال زياراتي وجولاتي الميدانية في كل أنحاء المملكة تعمقت لدي الخبرة، والمعرفة الحقيقية بأحوال الناس واحتياجاتهم. وأنا أعرف الهموم والمشاكل التي يعاني منها المواطن، وأعرف أحلامه وطموحاته وأعرف أن موضوع الغلاء وارتفاع الأسعار، وقضية الإسكان هي أكثر المواضيع أهمية، ومصدر قلق ومعاناة لأبناء وبنات هذا الوطن. وبالنسبة لموضوع الغلاء وارتفاع الأسعار، فكلنا نعرف أن هذا موضوع عالمي وخارج عن سيطرتنا وإرادتنا. ولكن أريد أن تكونوا متأكدين أننا لا يمكن أن نتخلى أو نتراجع عن واجبنا ودورنا في حماية المواطنين، باستخدام كافة الوسائل الاقتصادية الممكنة والمتاحة للتخفيف من الآثار السلبية للغلاء وارتفاع أسعار المواد الأساسية في حياة الناس.

أما موضوع الإسكان وهو موضوعنا لليوم، فقد سبق وأن وجهت الحكومة في خطاب العرش بأن يكون هذا العام عاماً لمشاريع الإسكان. ومن خلال دراسات الواقع السكاني في الأردن للسنوات الخمس القادمة تبين لنا أن الأمن الاجتماعي والاقتصادي أولوية ملحة، وتستدعي توفير السكن الكريم للعديد من الأسر الأردنية.

وأنا معكم اليوم من أجل إطلاق مبادرة وطنية هدفها تأمين حاجات المواطنين من السكن الكريم والعيش الكريم. وجوهر هذه المبادرة الوطنية للإسكان هو تضافر وتعظيم الجهود الرسمية والأهلية لتأمين وتوفير السكن لمئات الآلاف من المواطنين من ذوي الدخل المحدود والمتوسط وموظفي القطاع العام، والقوات المسلحة، والأجهزة الأمنية، والمتقاعدين العسكريين والمدنيين، لتأمين جميع هذه الفئات بالسكن الكريم والعيش الكريم. وسوف نحصر على أن تكون تكلفة هذه السكن في متناول الفئات والأسر المستفيدة من هذه المبادرة وأن تتناسب مع إمكانياتها. وقد وجهت الحكومة لتنفيذ هذه المبادرة، وبالسرية الممكنة، من خلال توفير الأراضي والبنية التحتية، وإنشاء نافذة تمويلية جديدة لتوفير التمويل اللازم لمشاريع هذه المبادرة، وتسهيل تمليك المواطنين للمساكن التي سيتم إنشاؤها. وسيقوم دولة رئيس الوزراء بوضعكم في صورة آليات عمل وتفاصيل تنفيذ هذه المبادرة، وهي تحتاج منا جميعاً إلى العمل المخلص الجاد والتعاون الكامل. وبارك الله فيكم جميعاً وبالتوفيق إن شاء الله.

والله يعطيكم العافية

خطاب جلالة الملك عبدالله الثاني بمناسبة الذكرى الأربعين لمعركة الكرامة  
الأردن/البحر الميت  
2008 آذار/مارس 19  
بسم الله الرحمن الرحيم

،الإخوة الحضور

،الإخوة النشامى رفاق السلاح

الله يعطيكم العافية وكل عام وأنتم والوطن بألف خير

وفي لقائنا في هذا اليوم المبارك الذي يتزامن مع ذكرى عظيمة وعزيزة على قلوب المسلمين، ذكرى المولد النبوي الشريف، نستذكر من هذا المكان الطاهر المعطر بدم الشهداء وبطولات الجيش العربي الذكرى الأربعين لمعركة الكرامة، التي حقق فيها نشامى هذا الجيش أعظم الانتصارات، وسجلوا فيها ملحمة الشجاعة والبطولة والتضحية والانتماء، وأعادوا فيها للأمة كرامتها وثقتها بنفسها

في هذا المكان وقبل أربعين عاماً قاتل النشامى الأردنيون بشرف وشجاعة، للدفاع عن ثرى الأردن، وبالرغم من تفوق العدو في العدد والسلاح والإمكانيات، تمكن أبناء هذا الجيش من تحقيق النصر الذي أذهل العدو، وأجبره على الإعراف بالهزيمة ولأول مرة في تاريخه

هنا وقبل أربعين عاماً، كان صوت الحسين - رحمة الله عليه - يشد من عزيمة النشامى، ويرفع معنوياتهم، وكان النشامى عند ثقة الحسين، فمنهم الذي جرح ومنهم الذي استشهد، ومنهم الذي إحتل بالنصر الكبير

ونحن اليوم ومن هذا المكان، نتوجه بتحية الفخر والاعتزاز لكل من شارك وساهم في هذه المعركة من مختلف الألوية والوحدات في الجيش العربي: لواء القادسية، ولواء الأميرة عالية، ولواء حطين، واللواء الهاشمي، واللواء المدرع الستين

وسائر الكتائب من المدفعية، والهندسة، والصيانة، والتموين واللاسلكي، والخدمات الطبية، وغيرها من كل التشكيلات التي ساهمت في تحقيق النصر في هذه المعركة

أما الشهداء، وأكرم الناس هم الشهداء، فقد كرمهم المولى عز وجل، أكثر وأعظم من أي تكريم على وجه الأرض، بقوله تعالى "ولا تحسبن الذين قتلوا في سبيل الله أمواتاً بل أحياء عند ربهم يرزقون" صدق الله العظيم. ومن الوفاء والإعزاز بتاريخنا، أن نقف اليوم إجلالاً واحتراماً لشهداء الجيش العربي في معركة الكرامة، وفي سائر المعارك، التي قاتل فيها، للدفاع عن الأرض العربية والكرامة العربية، سواء في فلسطين، أو في أي مكان، من الوطن العربي الكبير

ومهما تبدلت الظروف والأحوال، ستبقى معارك الجيش العربي وتضحياته، وأسماء الشهداء وبطولاتهم، أوسمة فخر واعتزاز، يعلقها كل مواطن أردني على صدره، لأنها تاريخنا وهويتنا التي لا يمكن أن ننساها، ولا نقبل المساومة عليها، أو إنكارها أو الإنقاص منها، من أي جهة كانت

والدرس التاريخي المستفاد من هذه المعركة، والذي يجب أن يفهمه العالم، وأطراف الصراع في القضية الفلسطينية، أن الحل وتسوية هذه القضية، لا يمكن أن يكون بالحروب، ولا يفرض أي حل بالقوة، وأن الحل لا يكون إلا بإعادة الحقوق إلى أصحابها، والإعتراف بحق الشعب الفلسطيني، بإقامة دولته المستقلة على الأرض الفلسطينية، وهذا هو طريق الخلاص من الحروب وآثارها المدمرة، والتي عانت منها شعوب المنطقة منذ أكثر من ستين عاماً

ويجب أن نعرف أيها الإخوة، أن كل مرحلة من مسيرة الوطن، لها تحدياتها وأخطارها، ويجب أن نكون دائماً على استعداد لمواجهة هذه التحديات، والتصدي لأي خطر، يمكن أن يهدد أمننا أو استقرارنا. وهذا ليس مسؤولية القوات المسلحة والأجهزة الأمنية وحسب، وإنما مسؤولية كل مواطن ومواطنة في هذا البلد، كل واحد من موقعه، وحسب دوره ومسؤولياته

هناك دائماً من لا يريد الخير لهذا الوطن، سواء من الخارج أو من الداخل، ومن الواجب أن نكون دائماً، على أعلى درجات الوعي، والشعور بالمسؤولية، والإستعداد للتصدي لأي خطر أو محاولة، للعبث بأمن هذا الوطن أو استقراره

ومرة ثانية أيها الأخوة، تحية الفخر والإعزاز لكل جندي وضابط وضابط صف، في الجيش العربي والأجهزة الأمنية، ولكل مواطن ومواطنة في هذا البلد، وبارك الله فيكم جميعاً، وكل عام والأردن العزيز بألف خير

والسلام عليكم ورحمة الله وبركاته

خطاب جلالة الملك عبدالله الثاني بمناسبة عيد الاستقلال  
الأردن عمان

2008 أيار/مايو 25

بسم الله الرحمن الرحيم

الإخوة والأخوات الأعزاء

الله يعطيكم العافيه، وأهلاً وسهلاً بالجميع، وكل عام وأنتم والوطن بألف خير

لقاؤنا في هذا اليوم المبارك، وبهذه المناسبة العزيرة على قلوبنا، عيد الاستقلال، هو تعبير عن اعتزازنا بهذا الإنجاز التاريخي الذي قام به الآباء والأجداد، وقدموا في سبيله أكبر التضحيات ... الرجال الذين ساروا في ركاب الجد الشهيد المؤسس الملك عبدالله بن الحسين، والملك طلال والحسين الباني ... من حقهم علينا أن نتذكرهم دائماً، وأن نبني على ما بنوا، وأن نواصل مسيرة العمل والعطاء للحفاظ على استقلال هذا الوطن وتعزيزه بمفهومه الشامل

فالاستقلال هو مسيرة من الإنجازات الوطنية التي تعزز مفهوم السيادة الشاملة، وحرية الإرادة، واتخاذ القرار الوطني الحر. وللحفاظ على الاستقلال وبهذا المفهوم، لا بد من ترسيخ الاستقلال الاقتصادي، من خلال الاعتماد على الذات

كلنا نعرف حجم التحديات والظروف التي تحيط بهذا الوطن، وتؤثر بشكل مباشر على أوضاعنا الاقتصادية. وأنا أعرف الواقع الذي يعيشه أبناء وبنات هذا الوطن العزيز، في مختلف مناطقهم، من الشوبك إلى المفرق، ومن المريغة إلى

الأزرق، ومن مخيم حطين إلى القويرة وجرش وغيرها الكثير، في الأرياف والبادية والمخيمات التي زرتها، وتلمست احتياجات أهلها وطريقة ومستوى معيشتهم، وهذا هو شغلي الشاغل وهمي الكبير. وبالمقابل أريدكم أن تعرفوا أيها الإخوة، إن مسيرتنا فيها الكثير من الإنجازات، والعديد من الجوانب المشرقة

ولذلك، نحن نسير بثقة على الطريق الصحيح، وأنا واثق من قدرة اقتصادنا، وقدرتنا نحن الأردنيين، على مواجهة التحديات، أكثر من أي وقت مضى. وتؤكدوا أيها الإخوة أننا نعمل ونواصل الجهود لتلبية طموحاتكم، وتأمين المستقبل الأفضل للأجيال القادمة، ولدينا الكثير مما نعتز ونفتخر فيه من الإنجازات الكبيرة، التي حققناها في السنوات الماضية، وهي مؤشر على أن مسيرتنا سليمة، وأن أداء اقتصادنا الكلي، يمضي قدماً نحو الأفضل. فهناك ارتفاع في نسب النمو الحقيقي، والقدرة على إيجاد فرص عمل جديدة، وزيادة إنتاجية الفرد الأردني، وهذه كلها حقائق نفاخر بها وبكم، لأنكم أنتم الذين صنعتموها، وجعلتموها واقعا ملموسا، بإرادتكم وعزيمتكم. ولا نريد أن نلثفت إلى أصوات المشككين بمسيرتنا الاقتصادية، والأردنيون النشامى، وكما كانوا على الدوام، مثال في القدرة على تحقيق الإنجازات العظيمة، وعدم الالتفات للمزایدات والمشككين

وفي هذه المناسبة، أدعو الجميع إلى التمسك بالتفاؤل والأمل ... وتؤكدوا أن المسيرة تتقدم، وسنستمر معا لنجني بإذن الله ثمار ما نزرعه اليوم. وأنا أستمد هذا التفاؤل والأمل والثقة بالمستقبل، من ثقتي بالشباب الأردني، ومن بريق الأمل والتفاؤل، المرسوم على وجوههم، ومن إيماني بعزيمتهم وقدرتهم على مواجهة التحديات وصناعة المستقبل، الذي نريده لوطننا، وللأجيال القادمة

طموحاتنا من أجل رفعة الأردن أولا وحاضرا ومستقبلا، سنبقى متواصلين بكل عزيمة وإصرار. فمنذ أسابيع قليلة تمكننا والحمد لله، من معالجة جانب كبير من المديونية الخارجية، التي كانت تثقل كاهل اقتصادنا الوطني، وتمكننا أيضا من المباشرة في تنفيذ مشرونا الوطني الكبير "سكن كريم لعيش كريم"، الذي سيوفر المسكن المناسب، للآلاف من الأسر الأردنية، من ذوي الدخل المحدود ... وإلى جانب ذلك، سنستمر بالعمل من أجل تحسين مستوى الخدمات الأساسية للمواطن الأردني، وهي التعليم النوعي والتأمين الصحي الشامل

#### الإخوة والأخوات الأعزاء

لقد حرصت منذ أن تشرفت بحمل أمانة المسؤولية، على العمل في الداخل والخارج، من أجل تحقيق طموحات شعبنا، وتحسين ظروفه الاقتصادية، ومواجهة كل التحديات السياسية والاقتصادية، بالعمل والإنجاز، وبالعزم والإرادة ... فالأردن اليوم، وبالرغم من محدودية موارده الطبيعية وإمكاناته، هو في طليعة دول المنطقة، في مجالات عديدة، في مقدماتها التعليم، ونسب النمو الاقتصادي، وكفاءات الشباب الأردني، الذي أثبت دائما، أنه متميز على المستويين المحلي والخارجي. وهذه الإنجازات ما كان يمكن تحقيقها، لولا نعمة الأمن والاستقرار، التي ينعم بها الأردن، والتي هي نتاج جهود قواتنا المسلحة والأجهزة الأمنية. وبهذه المناسبة أتوجه بتحية هاشمية صادقة، مفعمة بالأمل والثقة، لكل النشامى والنشاميات، الساهرين على حدود الوطن وأمنه واستقراره

#### الإخوة والأخوات الأعزاء

التنمية السياسية وضمان الحريات الأساسية للمواطنين ومؤسسات المجتمع المدني، وتعزيز مشاركتهم في اتخاذ القرار، هي حق مكفول في الدستور، وهي متطلب رئيسي، لتحقيق التنمية الشاملة المستدامة. وهذا لا يمكن أن يكون، إلا بوجود بيئة تسودها قيم الحرية والتعددية والتسامح، واحترام الرأي والرأي الآخر، وسيادة القانون وتكافؤ الفرص ... وضمن هذا الإطار، فقد وجهت الحكومة، للتعاون مع مجلس الأمة، للعمل على إنجاز حزمة من التشريعات المرتبطة بالتنمية السياسية، وخاصة تلك المتعلقة بحماية حقوق الطفل والمرأة، وتيسير الاجتماعات العامة، وتعزيز دور واستقلالية الجمعيات والهيئات الخيرية

وعلى الصعيد السياسي والأوضاع المحيطة بهذا البلد، فنحن والحمد لله، نتعامل مع هذه الأوضاع والمستجدات، بمنتهى الحكمة والوعي، والحفاظ على أمن بلدنا واستقراره، وحماية مسيرته ومنجزاته، وعلاقاته المتوازنة مع دول الجوار والأصدقاء

وأما بالنسبة للقضية الفلسطينية، فنحن واجبا وموقفا التاريخي الثابت، هو مساندة ودعم أشقاءنا الفلسطينيين، ولن نتوانى أو نتردد، في القيام بأي دور أو جهد، أو استثمار علاقاتنا مع الدول المؤثرة والمحافل الدولية، لتمكين الأشقاء الفلسطينيين، من الوصول إلى حقوقهم، وإقامة دولتهم المستقلة، على الأرض الفلسطينية. ونحن ملتزمون بهذا الدور، وملتزمون بخيار



السلام العادل، وقرارات الشرعية الدولية، ضمن الإجماع العربي، على التسوية السلمية. وسنبقى على قناعتنا، بأننا نحن الهاشميين، ندرنا أنفسنا، لخدمة أمتنا العربية والإسلامية، منذ فجر النبوة، ولن نتخلى عن واجبنا القومي، في الدفاع عن كل قضايانا العادلة.

وفي الختام، أتوجه بتحية الاعتزاز والثقة، إلى كل مواطن ومواطنة، على ثرى هذا الوطن الغالي، وأؤكد على تصميمنا وعزمنا على أن يظل الأردن، قويا عزيزا منيعا، وسنبقى بعون الله تعالى، ثابتين على الحق، نؤدي واجبنا تجاه شعبنا الوفي، ونحمي وطننا وندافع عن منجزاته، بهمة النشامى الأردنيين.

،وكل عام وأنتم جميعاً والوطن بألف خير

والسلام عليكم ورحمة الله وبركاته

خطاب جلالة الملك عبدالله الثاني في حفل تخريج الفوج الحادي والعشرين/ كتيبة خالد بن الوليد  
الأردنالكرك

2008 حزيران/يونيو 11

بسم الله الرحمن الرحيم

،الإخوة الخريجون الأعزاء

،الإخوة والأخوات الحضور الكرام

،الله يعطيكم العافية

هذا يوم من أيام الوطن المباركة الذي نحتفل فيه بتخريج هذه الكوكبة من فرسان الوطن النشامى، الذين سيكونون اعتباراً من هذا اليوم، ضباطاً في الجيش العربي، والأجهزة الأمنية، وسيكون لهم شرف الخدمة العملية في ميادين العمل والتضحية والعطاء، إلى جانب إخوانهم ورفاقهم في السلاح، من الضباط والجنود الذين نذروا أرواحهم للدفاع عن تراب هذا الوطن وأمنه واستقراره.

وفي هذا اليوم وبهذه المناسبة، أتوجه بتحية الفخر والاعتزاز، وبأطيب التهاني والمباركة، للنشامى الخريجين "الفوج الحادي والعشرين كتيبة خالد بن الوليد"، بهذا النجاح والإنجاز، في إكتساب المعرفة والإعداد والتدريب، الذي يمكنهم من القيام بواجباتهم ومسؤولياتهم في المستقبل، كضباط وقادة في القوات المسلحة... وكل الشكر والتقدير للإخوة في جامعة مؤته من مدرسين ومدرّبين وإداريين، على ما بذلوه من الجهود الطيبة، والعطاء المستمر من أجل إعداد هذا الفوج من الخريجين، ومن الأفواج السابقة.

،الإخوة الخريجون الأعزاء

إعتباراً من هذا اليوم، سيكون كل واحد منكم في ميادين الشرف والعمل والعطاء، فأنتم جنود الوطن المخلصين، الذين لا تزيدكم التحديات والصعوبات، إلا عزيمة وإرادة، وقوة وإخلاص، لرسالة الثورة العربية، التي قامت من أجل تحرير الأمة وتوحيدها، والدفاع عن قيم الحق والعدالة والحرية. وأنا واثق أن كل واحد منكم، يدرك أن أمن الوطن واستقراره، هو فوق كل المصالح والإعتبارات، وأن الأولوية الأولى بالنسبة لنا جميعاً، هي حماية هذا الوطن، والحفاظ على مسيرته ومنجزاته.

إن القوات المسلحة شريك رئيسي، في مسيرة التنمية الشاملة وخاصة في مجالات التدريب والتأهيل للقوى البشرية، وإقامة المشاريع الإنتاجية، وتوفير الخدمات الأساسية، في مجالات التربية والتعليم والرعاية الصحية.

وأريدكم أن تكونوا متأكدين يا نشامى أنتم وإخوانكم، جميع منتسبي القوات المسلحة والأجهزة الأمنية، أننا حريصون كل الحرص، على دعم ورعاية هذه القوات، من خلال التحديث والتطوير، والإعداد والتدريب، وتزويدها بأحدث الأسلحة والمعدات، وحريصون أيضاً على الاستمرار في تحسين الظروف المعيشية، وتوفير السكن الكريم، لأسر وعائلات النشامى في الجيش العربي والأجهزة الأمنية. أما المتقاعدون وأسر الشهداء والمصابون العسكريون، فمن حقهم علينا جميعاً، أن يكونوا موضع الإهتمام والرعاية والتقدير، والاعتزاز بتضحياتهم وما قدموه لهذا الوطن.

وبهمة وعزيمة النشامى والنشميات أبناء وبنات الأسره الأردنيه الواحدة، سيبقى الأردن العزيز واحة للأمن والاستقرار، ومثالا في التقدم والإزدهار، والقدرة على مواجهة التحديات وتحقيق أعظم الإنجازات

ومرة ثانية أيها الإخوة تحية الإعتزاز والتقدير، لكل ضابط وضابط صف وجندي في الجيش العربي والأجهزة الأمنية، وألف مبروك للإخوة الخريجين الضباط.... والمعنويات عالية والراية مرفوعة بعون الله

والسلام عليكم ورحمة الله وبركاته

خطاب جلالة الملك عبدالله الثاني في حفل افطار القوات المسلحة الأردنية  
الأردنالزرقاء

2008 أيلول/سبتمبر 03

بسم الله الرحمن الرحيم

،إخواني النشامى رفاق السلاح

،الله يعطيكم العافية

جئت اليوم، حتى أكون معكم وبينكم، في مطلع الشهر الفضيل ... وأبارك لكم وأهنئكم بشهر العباداة والفضيلة والتضحية والخير ... ومن بينكم من هذا المكان، أتوجه أيضا بالمباركة والتهاني، لكل أبناء وبنات الأسرة الأردنية الواحدة الكبيرة، ولأمتنا العربية والإسلامية ... فكل عام وأنتم وشعبنا وكل المسلمين بألف خير، وإن شاء الله يكون هذا الشهر، شهر خير وبركة على جميع المسلمين، في كل مكان من هذا العالم

،إخواني النشامى

في هذا الشهر المبارك، نتذكر دائما التضحيات والبطولات التاريخية، لأمتنا العربية والإسلامية، والكثير من معارك الشرف والإنصارات، التي حققها الأجداد، من العرب والمسلمين، على مر العصور... نتذكر هذه الإنجازات والإنصارات العظيمة، حتى نستمد منها العزم والإرادة، والثقة بقدرتنا، على مواجهة التحديات والصعوبات، وصناعة المستقبل، الذي يكون فيه الأردن، المثل والقوة، في الأمن والاستقرار، والقوة والإزدهار، وتوفير الحياة الكريمة، لكل مواطن ومواطنة في هذا البلد

أنا أعرف التحديات الاقتصادية الكبيرة، التي تحيط بهذا البلد، وتؤثر على مستوى حياة أهلنا وشعبنا العزيز. وأنا مؤمن أن هذه التحديات، سواء الداخلية منها أو الخارجية، يجب أن تكون دافعا لنا، للمزيد من العمل وحشد الطاقات والإمكانات، وتسخيرها كلها لمواجهة هذه التطورات الاقتصادية العالمية، بالإرادة والحكمة والثقة والثبات ... وأنا متأكد أنه بهمة النشامى والنشميات، أبناء هذا الوطن وعزيمتهم، سنتغلب على كل هذه التحديات، وسنكون في وضع إقتصادي أفضل، وهذا الوعد سيكون واقعا ملموسا بعون الله

،إخواني النشامى

الجيش العربي له مكانة خاصة في نفسي وفي وجداني، وهذه المكانة أيضا، موجودة عند كل الأردنيين، وكلنا يعرف حجم المسؤوليات الكبيرة، التي يتحملها هذا الجيش، وحجم التضحيات التي قدمها طيلة العقود الماضية. ولذلك، نحن حريصون كل الحرص، على تقديم كل الدعم والرعاية لقواتنا المسلحة والأجهزة الأمنية، لتوفير جميع عناصر الأمن الاجتماعي، وتحسين الظروف المعيشية، لكل جندي وضابط صف وضابط، في القوات المسلحة والأجهزة الأمنية، حتى تظل كما كانت على الدوام، مثالا وقوة في العمل المؤسسي والوطني الرائد، ومدرسة للإنضباط والكفاءة، وتقديم مصلحة الوطن، على كل المصالح والإعتبارات

ومنذ بداية تحملي أمانة المسؤولية الأولى، كنت وما زلت، على قناعة تامة، بأنه من حق قواتنا المسلحة والأجهزة الأمنية علينا، أن يكون لها نصيب عادل، من مكتسبات التنمية وعوائد الإصلاح الإقتصادي. فالأمن والأمان، من أهم العناصر التي مكنتنا من تحقيق تقدم إقتصادي إيجابي. ولذلك فقد وجهت الحكومة في وقت سابق، لتخصيص 3% من أسهم

المؤسسات العامة التي تمت خصصتها لمنفعة المنتسبين والمتقاعدين، من القوات المسلحة والإجهزة الأمنية، تقديرا منا لدورهم وتضحياتهم وبطولاتهم

واليوم وفي شهر الخير والتكافل والعطاء، ولقناعتي بضرورة مواجهة التحديات الإقتصادية، فقد وجهت رئيس هيئة الأركان المشتركة، لأصرف جزء من عوائد هذه الأسهم، وتخصيص 200 دينار، لكل واحد من أفراد وضباط القوات المسلحة والأجهزة الأمنية والمتقاعدين العسكريين، قبل حلول عيد الفطر السعيد إن شاء الله

ومرة ثانية، يا نشامي، مبروك عليكم الشهر الفضيل، وسنبقى على الدوام، نعمل بأقصى طاقاتنا وإمكاناتنا، لدعمكم إجتماعيا واقتصاديا وعسكريا، وإنتم تستحقون كل الدعم والتقدير، لأنكم حماة الوطن ورمز سيادته وكرامته... وبارك الله فيكم... وكل عام وأنتم والأهل والوطن بألف خير

والسلام عليكم ورحمة الله وبركاته

كلمة جلالة الملك عبدالله الثاني خلال زيارته إلى مدينة الحسين الطبية

الأردنعمان

2009 شباط/فبراير 07

بسم الله الرحمن الرحيم

،الإخوة الأعزاء

،الله يعطيكم العافية

نلتقي اليوم في هذا الاحتفال الذي قمتم به، لتخليد ذكرى الحسين رحمة الله عليه، الحسين القائد والبناني والإنسان

الحسين الذي رحل عن هذه الدنيا، في مثل هذا اليوم، وترك للأردن وللشعب الأردني، هذه الإنجازات الوطنية العظيمة، في كل مجالات الحياة الصحية والتعليمية والاقتصادية والاجتماعية وغيرها. وهذه الإنجازات ما كان يمكن تحقيقها، لولا إرادة الحسين، وعزيمة وتضحيات أبناء وبنات هذا الشعب، الذين حققوا أعظم الإنجازات، بالرغم من قلة الموارد والإمكانات، وبالرغم من الحروب والصراع وعدم الاستقرار، التي عانت منها شعوب هذه المنطقة طيلة العقود الماضية

نلتقي اليوم للتعبير عن تقديرنا واعتزازنا، واعترافنا بالفضل للحسين، ورفاق مسيرته، الذين حققوا هذه الإنجازات، التي يجب أن تكون لنا مثلاً وقوة ومصدر إلهام، للاستمرار في المسيرة، والبناء على ما تم بناؤه، وتحقيق المزيد من الإنجازات في كل مجالات الحياة

وهذه المدينة، مدينة الحسين الطبية، كانت هدية الحسين، لأبناء وبنات هذا الشعب الخير المعطاء، وهي عزيزة وغالية، ولها مكانة خاصة في ضمير ووجدان كل أردني وكل أردنية

ومن الوفاء للحسين، والتزاما بواجبنا تجاه بلدنا وشعبنا، سنحافظ على هذا الرمز، وعلى هذا الإنجاز الحضاري الكبير الذي نعتز فيه. وسنعمل على تطوير وتحديث هذا الصرح الطبي الكبير وزيادة قدراته وإمكاناته، وتزويده بأحدث الأجهزة والمعدات والكفاءات البشرية، التي تمكنه من أداء رسالته الإنسانية النبيلة، وتحافظ على مستواه المتميز ومكانته المرموقة

ومن هنا، من مدينة الحسين الطبية، ومن هذا الاحتفال، نعلن عن إطلاق حملة، يتم من خلالها الاتصال بكل أصدقائنا، وأصدقاء الحسين، وكل الجهات المعنية، في مختلف أنحاء العالم، لتوفير التمويل اللازم، لتحديث وتطوير مدينة الحسين الطبية. وبالمناسبة، تكلفة هذا المشروع حوالي 200 مليون دينار

ومرة ثانية يا إخوان، اعتزازي بكم وبمدينة الحسين الطبية ليس له حدود، وتأكدوا أن هذه المدينة هي موضع اهتمامي ورعايتي، وإن شاء الله قريباً سيتم وضع الخطط والبرامج، والمباشرة بتنفيذها، لتحديث وتطوير هذا الصرح الطبي الوطني العظيم.

وتحية الاعتزاز والتقدير لكم، ولكل مواطن ومواطنة في الأردن العزيز

والله يعطيكم العافية

خطاب جلالة الهاشمية الملك عبدالله الثاني في مؤتمر القمة العربية العادية الحادية والعشرين

قطر الدوحة

2009 آذار/مارس 30

بسم الله الرحمن الرحيم

والصلاة والسلام على سيدنا محمد النبي العربي الأمين

،أصحاب الجلالة والفخامة والسمو

،الأخ الأمين العام لجامعة الدول العربية

،الإخوة الحضور

،السلام عليكم ورحمة الله وبركاته وبعد

فيأتي انعقاد هذه القمة، وأمتنا العربية تواجه العديد من التحديات التي يفرضها ما يشهده العالم ومنطقة الشرق الأوسط، من مستجدات وتحولات، تهدد الأمن العربي، وتدفع بالمنطقة إلى المزيد من التوتر وعدم الاستقرار، مما يستدعي بناء رؤية استراتيجية موحدة، للتعامل مع هذه المستجدات الحالية والمستقبلية، على نحو يضمن حماية مصالحنا وقدراتنا، على التأثير الفاعل في الأحداث.

والقاعدة الأولى التي ينبغي أن تقوم عليها رؤيتنا الإستراتيجية المستقبلية، هي استكمال تنقية الأجواء العربية، وتجاوز الخلافات فيما بيننا، وتوحيد المواقف والجهود، وتعزيز مبدأ التضامن العربي. وهنا أذكر بالثناء والتقدير، جهود خادم الحرمين الشريفين المخلصة والمستمرة، من أجل تحقيق المصالحة العربية، وتوحيد الصف العربي. إن التضامن العربي ليس شعاراً يرفع، وإنما هو فعل وعمل، يقوم على العلاقات المؤسسية، وليس على الإساءة إلى بعضنا البعض

إن القضية الفلسطينية هي القضية الرئيسية للأمة العربية، ولا يمكن للسلام والاستقرار، أن يتحقق لشعوب هذه المنطقة، إلا بعد إيجاد تسوية عادلة وشاملة لهذه القضية، على أساس قرارات الشرعية الدولية والمبادرة العربية، التي تؤكد على أن أي حل للصراع العربي الإسرائيلي، لا بد أن يضمن إقامة الدولة الفلسطينية المستقلة على الأرض الفلسطينية وعاصمتها القدس، ولا بد لهذا الحل، من أن يضمن أيضاً انسحاب إسرائيل من جميع الأراضي العربية المحتلة منذ عام 1967، بما فيها الجولان السوري ومزارع شبعا

ولابد هنا من التأكيد على ضرورة الاتفاق على خطة عمل عربية، لحماية القدس من محاولات تغيير هويتها العربية وتفرغها من أهلها. وعلى هذا الأساس، فلا بد من التمسك بمبادرة السلام العربية، التي تم قبولها دولياً، واحدة من المرجعيات الأساسية، لتسوية الصراع العربي الإسرائيلي، والتأكيد على رفض أي محاولة لتغيير المرجعيات الدولية، التي تم الاتفاق عليها لتسوية القضية الفلسطينية. ولا بد أيضاً، من توجيه رسالة واضحة إلى العالم وإلى إسرائيل، تؤكد أن الأمن الإسرائيلي، مرتبط بتحقيق السلام بينها وبين الدول العربية، وهو أمر لا يمكن الوصول إليه، إلا إذا قبلت إسرائيل بالمبادرة العربية، والتزمت بما جاء فيها

،أصحاب الجلالة والسيادة والسمو

إن استمرار التدخل الخارجي في الشؤون الفلسطينية، هو السبب الرئيسي لاستمرار الانقسام الفلسطيني، مما سيؤدي في النهاية، إلى تراجع التأييد الدولي للقضية الفلسطينية، وخدمة المخططات الإسرائيلية، لتكريس انفصال غزة جغرافياً وسياسياً عن الضفة الغربية. ولذلك، فإننا ندعو إلى التصدي بقوة للتدخل الخارجي في الشؤون الداخلية الفلسطينية، وتقديم كل الدعم للجهود التي تقوم بها مصر الشقيقة، من أجل تثبيت وقف إطلاق النار في غزة، وتحقيق المصالحة الوطنية، بين الفصائل الفلسطينية، وفقاً لقرارات الجامعة العربية، وبما يضمن وحدة القرار الفلسطيني، ويمكن القيادة الفلسطينية، من الحصول على حقوق الشعب الفلسطيني، وفي مقدمتها حقه في إقامة دولته المستقلة. وعلى ذلك، فلا بد من دعم السلطة الوطنية الفلسطينية، ودعوة المجتمع الدولي، إلى تقديم كافة أشكال الدعم للشعب الفلسطيني، لتمكين هذا الشعب على أرضه سياسياً واقتصادياً

ونؤكد في هذه القمة، على ضرورة دعوة المجتمع الدولي والإدارة الأميركية، إلى الضغط على إسرائيل، لوقف سياسات العدوان والحصار والإغلاق والاستيطان والتهجير، التي تمارسها على الشعب الفلسطيني، لإثبات رغبتها في السلام، والدخول في مفاوضات جادة، للوصول إلى هذا السلام، الذي يضمن لها الأمن، ويضمن حقوق الشعب الفلسطيني، وعلى أساس حل الدولتين الذي يتبناه المجتمع الدولي

،أصحاب الجلالة والسيادة والسمو

لقد تعددت أشكال التدخل الخارجي، في الشؤون الداخلية والقضايا المحورية العربية. ولذلك، فإننا مدعون في هذه المرحلة، وأكثر من أي وقت مضى، إلى نبذ خلافاتنا، وتوحيد مواقفنا وجهودنا، للتصدي لهذه التدخلات الإقليمية والدولية، في الشؤون الداخلية لبعض البلدان العربية

ومن هنا، فإننا نؤكد دعمنا الكامل للعملية السياسية في العراق الشقيق، وتعزيز المصالحة الوطنية، التي تقوم على إشراك جميع مكونات الشعب العراقي في هذه العملية، لترسيخ الوحدة الوطنية، والحفاظ على وحدة العراق وسيادته، بعيدا عن التدخل في شؤونه الداخلية، من أي جهة كانت

ولابد لنا أيضا، من الوقوف بكل حزم وقوة، إلى جانب أي دولة عربية، في وجه أي محاولة للتدخل في شؤونها الداخلية، أو التشكيك بعروبيتها وسيادتها واستقلالها، أو الاعتداء على أراضيها، وفي وجه أي محاولة، للعبث بأمن منطقة الخليج العربي واستقرارها

أما بالنسبة للسودان الشقيق، فلا بد لنا من التحرك والتعامل بمنتهى الوعي والمسؤولية، مع أزمة دارفور، ومحكمة الجنايات الدولية، لضمان أمن السودان، ووحدته واستقراره وسيادته

ولابد لي في ختام هذه الكلمة، من أن أتوجه بالشكر والتقدير إلى سمو الشيخ حمد بن خليفة آل ثاني، على استضافة هذه القمة، وإلى أخي سيادة الرئيس بشار الأسد، على جهوده الخيرة خلال رئاسته للقمة العربية. كما أتوجه بالشكر أيضا إلى الجامعة العربية، وأمينها العام وكوادرها، على جهودهم الطيبة في الإعداد لهذه القمة

،والسلام عليكم ورحمة الله وبركاته

كلمة متلفزة لجلالة الملك عبدالله الثاني هنا فيها الاسرة الاردنية بحلول عيد الاضحى المبارك  
الأردنعمان

2009 تشرين الثاني/نوفمبر 26

بسم الله الرحمن الرحيم

والحمد لله رب العالمين والصلاة والسلام على سيدنا محمد، النبي العربي الهاشمي الأمين

،أيها الإخوة والأخوات أبناء الأسره الأردنية الواحدة الكبيرة

،السلام عليكم ورحمة الله وبركاته وبعد

فيسرني ونحن نستقبل عيد الأضحى المبارك، هذه المناسبة العزيزة على قلوب المسلمين جميعا، أن أتوجه إليكم وإلى كل أبناء الأمتين العربية والإسلامية، بأطيب التهاني والمباركة، فكل عام وأنتم وكل المسلمين بألف خير

وبهذه المناسبة، أتوجه معكم بالتهنئة الخاصة إلى أهلنا وأشقائنا غرب النهر، الذين ما عرفوا فرحة العيد من عقود طويلة، وما زالوا يعانون من ظلم الاحتلال وغياب العدالة. نحيبهم في هذا اليوم، ونؤكد على وقوفنا إلى جانبهم، واستمرار دعمنا لهم، في سعيهم للوصول إلى حقوقهم المشروعة، وخصوصا حقهم في الحرية وفي قيام دولتهم المستقلة على ترابهم الوطني.

أما أنتم يا أبناء وبنات شعبي العزيز، الأردنيين والأردنيات، الأحرار الشرفاء، العامل، والمزارع، والطالب، والمعلم، والموظف، والنشامى أبناء القوات المسلحة والأجهزة الأمنية، في كل مواقعكم، فأنتم الأهل والعزوة والسند، وأنتم موضع الفخر والإعتزاز

والحمد لله بلدنا بخير، ونحن نسير على الطريق الصحيح، لبناء مستقبل الوطن، ونحن واثقون من قدرتنا، وبجهود الجميع، على مواجهة التحديات، وتحقيق طموحاتنا، وبناء المستقبل المشرق الذي نريده لأبنائنا وأحفادنا

وسنواصل مسيرة الإصلاح والتحديث والتطوير، في كل جوانبها السياسية، والاقتصادية، والاجتماعية والادارية، لتحقيق التنمية الشاملة، التي تنعكس آثارها الإيجابية على حياة المواطن، وتمكنه من العيش الكريم، الذي هو من حقه على بلده ومجتمعه

وأنا أعرف أن الوضع الإقتصادي صعب، لكن مثل ما قلت في السابق، ومثل ما تقولون أنتم دائماً، صبرنا على حالنا ولا صبر الناس علينا. والعمل مستمر ضمن خطة عمل واضحة، من أجل تحسين الأوضاع، وتحقيق الأفضل لكم، ولوطننا الغالي، وأنا لا أَرْضَى لكم، إلا بأفضل ما يمكن تحقيقه

ولا أريد أن أطيل عليكم، ولا أريد أن أفتح ملفات التحديات والمشاكل التي تواجهنا الآن، لأن هذه مناسبة فرح، وأحببت أن أعايد عليكم، وأقول لكم كل عام وأنتم بألف خير، وأريد أن تكونوا متأكدين أننا نعمل كل ما بوسعنا، وسنقوم بكل ما يلزم، لمواجهة التحديات وتجاوز المشاكل وتحسين الأداء

وبعون الله، وبهمتكم وعزيمتكم، سنحقق كل طموحاتنا وأهدافنا الوطنية النبيلة

والسلام عليكم ورحمة الله وبركاته

Statement of His Majesty King Abdullah II at the Red Sea Peace Summit

JordanAqaba

04 June 2003

President Bush,  
Prime Minister Sharon,  
Prime Minister Abbas,

Distinguished Guests,

We gather today in Aqaba. This small city that symbolizes the immeasurable potential of bringing different peoples together. Not far from here, Jordan and Israel signed a peace treaty in 1994. Nine years later, what brings us here is the same dream. A dream of peace, prosperity, coexistence and reconciliation. But dreams alone cannot fulfill hopes. It is thanks to the efforts of President Bush, and the commitments of Prime Minister Sharon and Prime Minister Abbas that we meet here today to transform these dreams into real achievements on the ground.

Mr. President, Prime Minister Sharon, Prime Minister Abbas, Let us have ambitions. Ambitions to move beyond the violence and occupation, to the day when two states, Palestine and Israel, can live together, side by side, in peace and security. And in our hands today, we hold the mechanism that can translate these ambitions into realities on the ground. It is a plan, the road map, that addresses the needs of both Palestinians and Israelis. To the Israelis, this plan offers collective security guarantees by all Arabs, a peace treaty and normal relations with Arab states, and an end to the conflict. To the Palestinians, it offers an end to the occupation, a viable state, and the promise to live as a free and prosperous people.

To be sure, the road to realising this vision will not be straightforward or without obstacles. I am aware that many in our region and around the world, view our gathering today through a lens marred with scepticism and suspicion. The failures and frustrations of the past have left many disbelievers in their wake.

Today we have the opportunity and obligation to reinstate faith in the process, and to reinvigorate hopes for a better tomorrow. We simply cannot afford the alternative. Over the past few years, the road of confrontation has shown its consequences: loss of innocent lives, destruction, and fear. Most costly, however, was the loss of hope. The most precious gift that you can present to your people over the coming weeks is renewed hope born out of tangible progress on the ground. And it is not only your people who will be watching and waiting; the eyes of the entire world will be upon you. The nature of our new borderless world, means that we all have a stake in what happens here. Jordanians, Americans, Europeans and many around the world stand ready and willing to lend all their support to ensure your success.

At the end of the day, however, it is you, the Palestinians and Israelis, who have to come together to resolve the many outstanding issues that divide you. Many will view the compromises that will be made during your negotiations as painful concessions, but why not

view them as peace offerings. Ones that will provide in return the priceless gifts of hope, security and freedom for our children and children's children. It is only by putting yourselves in each other's shoes that we can hope to achieve real progress.

Thus, we reaffirm today our strong position against violence in any form, and from whatever source. Blowing up buses will not induce Israelis to move forward, and neither would the killing of Palestinians or the demolition of their homes and their future. All this needs to stop, and we pledge that Jordan will do its utmost to help achieve that.

Mr. President, you have stayed the course. Your presence here today, to witness the two leaders meeting together, agreeing on common ground to solve this conflict, provides a great impetus to move forward, and a clear answer to all the sceptics. I thank you for your leadership and courage.

Prime Minister Sharon, Prime Minister Abbas, I urge you, today, to end the designs of those who seek destruction, annihilation and occupation. And, I urge you to have the will and courage to begin to realise our dreams of peace, prosperity and co-existence. And remember, that in the pursuit of these noble goals, Jordan will always remain a true friend.

Remarks by His Majesty King Abdullah II  
At the 91st International Labour Conference  
Switzerland/Geneva  
12 June 2003

In the name of God, the merciful, the compassionate,

Mr. President  
Your Excellency, Mr. Director General,  
Excellencies,  
Ladies and Gentlemen,

Thank you for your kind welcome. Rania and I are honoured to be here at this most important conference at the invitation of a good friend, Juan Somavia. Mr. Director General, your efforts to promote decent work; your dedication to human rights; your global vision – these have inspired respect around the world. Allow me to speak for all Jordanians in thanking you – and in thanking all the delegates here – for everything you are doing to create a better future for humankind.

My friends,

Your organisation recognises a fundamental truth about our world: work and working people are at the heart of global prosperity. In our 21st century, attention is often focused on technologies and markets. But let us remember that at best, these are only tools, tools that



have allowed the world's peoples to combine their energies and talents. Freeing that capability has unleashed tremendous creativity and productivity and unprecedented abundance. It has been estimated that, worldwide, the goods and services produced in the past 100 years – primarily in the last 50 – exceeded all that humanity had produced since recorded history began. And our future potential is great.

Yet for too many people, far too many, this abundance is a dream denied. One third of humanity has been marginalised by unemployment and underemployment; others are barely subsisting. They suffer the hardships and dislocations of globalisation, but they have not yet reaped its benefits. Young people, who desperately need opportunities and hope, see themselves and their societies held back by poverty, health crises, illiteracy, and more. Is it any surprise that these communities can become recruiting grounds for extremist ideologies?

We cannot move forward – we cannot fulfill the 21st century's promise – until we deal with these problems. Nor can we delay. The “war against want” – a war enshrined in the ILO's Philadelphia Declaration – has a new name today: it is the war against terror. Only by defeating want, can we heal the divisions and despair that feed global violence. This requires sustainable socio-economic development, development that enables all people to live in dignity. Such development is an important tool in the battle against extremism – as is a

Opportunity is a powerful force in giving people a stake in a peaceful future. It is up to us to create a global growth economy – one that will give people the jobs they need to support their families and improve their lives. There must be safety nets – national and international – that can combat the social and economic imbalances of globalisation; real access to the education and technologies that open the doors to tomorrow; and, perhaps most important, justice – to show people, especially young people, that ours is a world of fairness and hope.

Jordan has espoused the values that are embedded in the ILO Charters and Conference. We have embarked on a process of enhancing the productivity of our labour force by adopting bold educational reforms and giving the private sector the prominent role in the design of vocational training programmes. We are convinced that our economy will not grow until the productivity of our labour force grows. This is the essence of our national socio-economic agenda. And, we have had positive results as evident in our recent indicators.

And we also take our international responsibilities seriously. I am pleased that Her Majesty Queen Rania is one of a select group of heads of state and first ladies, who have taken an active role in ILO's efforts to combat child labour around the world. Jordanians are working hard to ensure that child labour is not a serious problem in our country, and we continue to pioneer preventive measures. Our strategy has had one goal: to improve the well-being and opportunities of our citizens. Jordanians deserve no less.

We also believe that socio-economic reform cannot be sustained in the absence of democratic consent. This is why we have insisted on political reforms to ensure government transparency

and accountability. Jordan recently established a National Centre for Human Rights as well as an independent Higher Council for Media. In these and other ways, Jordan has been working tirelessly to create an environment of justice, democracy, due process, equal opportunity and gender equality. And, as many of you know, parliamentary elections will be held next week.

Ladies and Gentlemen,

It would be untrue to suggest that my country, or any country, can make it alone. Today, for developed and developing nations alike, progress on the national level demands progress on the global level as well. Achieving such progress will require a true partnership between developed and developing countries – a partnership based on our common interests, our interdependence, and our shared responsibilities. Only such a partnership can deliver the global justice that is required and encourage developing countries to embark upon needed political, economic and social reforms.

The new global partnership faces hard choices for reshaping the national and global governance agenda, for a more equal distribution of benefits. Dialogue must be coupled with action, from both sides. Across the board, we need improved market access, the removal of trade barriers and predictable trade policies. Developed countries must increase the level of direct assistance, encourage foreign direct investment and technology transfer and reduce the debt burden. Developing countries must commit to sound economic policies, coupled with the right safety nets, good governance and the rule of law. In my region, in every region, we must cooperate, and quickly, to address key issues – political freedoms, improving the role of women, and bridging the knowledge gap.

Jordan will shortly host an extraordinary annual meeting of the World Economic Forum, bringing leaders together to agree on a shared vision of global cooperation. I hope these initiatives will begin new and intensified efforts to restore confidence in our common future and enhance global governance.

My friends,

We must also address the urgent need to rebuild and stabilise the Middle East region. Our region sits at a critical crossroads. The credibility, not merely of our own countries, but of the international community, is at stake. Now is the time to work together, to put our full force behind the process that will lead to the hand-over of Iraq to a credible Iraqi government, representing all Iraqis. And now is the time to achieve a just and comprehensive peace in the Middle East.

Palestinians and Israelis have signed on to the Peace Road Map, a Road Map that addresses the needs of both parties. To the Israelis, this plan offers collective security guarantees by all Arabs, a peace treaty and normal relations with Arab states, and an end to the conflict. To Palestinians, it offers an end to the occupation, a viable state, and the promise to live as a free people.

Last week, at the Aqaba Summit, the parties pledged to make real efforts to move forward. And that process is beginning. But the friends of peace must now stay the course. At the end of the day, we will need the full energies of regional and international leaders, working in real partnership, if we are to achieve a future of peace, security and coexistence.

In this regard, I wish to commend your Convention for its attention this afternoon to the worsening situation of workers in the Occupied Territories. Nothing demonstrates more urgently the need to bring this occupation to an end.

My friends,

Centuries ago, human beings thought the earth was flat. That view did not change until brave souls set out to test the boundaries of the known world.

Today, echoes of that old, flat-earth philosophy remain. We hear them in the complacent voices of those who are satisfied with a two-dimensional world, where a minority sit safely in the centre, in prosperity; and billions are forced to live in poverty and violence, out on the edge. Well, the flat-earthers are history. I believe the future belongs to those who see the world in its full dimensions – an undivided sphere, whose every point is a centre; whose every person is entitled to prosper and succeed, in peace and security.

There is an old maxim: “By the work, one knows the workman.” By our work, the future will know our generation. Were we really committed to peace; to equity; to justice? It is in our hands to create what we know is right. Together, in partnership, in mutual respect, I believe that we can.

Speech of His Majesty King Abdullah II  
To the Opening Session of the World Economic Forum  
Jordan/Dead Sea  
21 June 2003  
Peace be upon you.

Professor Schwab,  
Distinguished Members and Guests,

This is titled an extraordinary meeting, and it is, indeed, extraordinary. An unparalleled group is gathered here in Jordan at a critical moment in history, with an unmatched opportunity to help create a new future: a future of promise, a future of freedom, a future of peace.

Professor Schwab, my friend, I thank you for having the vision and the courage to believe in that future and to know that dialogue is the key to the door. It is a measure of your stature that you have brought together so many leaders, from different sectors, from different sides, who

all have a role in this region's future. To everyone here, I thank you for your commitment and your efforts; now, and in the days and months ahead.

When we met in Davos, last January, we could not know we would meet again so soon – or that so much would happen in the meantime. Then, we talked about the looming war in Iraq. Now, we talk about speeding up humanitarian outreach, reconstruction and a credible Iraqi government that represents all its people. Then, we talked about winning a commitment to the roadmap to peace for Israel and Palestine. Now, we talk about making that commitment a reality: a comprehensive peace; two states, living side by side, in peace and security.

I have called this a critical moment. At no other time has there been such despair, and yet such hope. Such misery, and yet such promise. Such bloodshed, and yet such a passionate yearning for peace. Such risks – and yet such opportunity.

Less than three weeks ago, in Aqaba, we witnessed Palestinians and Israelis affirm their sincere intent to pursue the road to peace: to the Israelis, the roadmap offers collective security guarantees by all Arabs; a peace treaty and normal relations with Arab states; and an end to the conflict. To the Palestinians, it offers an end to the occupation; a viable, independent state by 2005; and the promise to live as a free and prospering people.

The roadmap has been sanctioned by the international community. It must now be implemented. This will require more than words and wishes. The friends of peace – within the region and around the world – must stay the course. That means real commitment, commitment that will test our leadership, resources, and, our deepest morality.

Since the Aqaba Summit, renewed violence has been a magnet for media attention. Extremists have tried to derail the peace process – to push it back into the old path of division and hatred and futility. When we hear this news, we must remember what the vast majority on both sides want. They want peace – to work and save, to send their children to school, to plan for the future. People are crying out for normal life, for freedom, for hope. These are the voices that count.

My friends, there must be no more missed opportunities. It is time to listen to the prayers, dreams and expectations of those who live in and love the Holy Land. It is time to lead the way to peace; a peace that works, a peace that lasts.

Tomorrow the Quartet – Europe, Russia, the UN and the United States – will meet here in Jordan to plan the next steps for the implementation of the roadmap. The fact that they set their meeting to take place now, side-by-side with this meeting, speaks to the part that this Forum is playing in an historic period of change.

Over the next two days, the members of the forum will focus their expertise on core challenges: identifying mechanisms to implement the peace roadmap – advancing economic, social and political reform in the region; fuelling the engines of growth and development; and

promoting the reconstruction of Iraq, a reconstruction that respects the rights of its people to determine their own future. Binding these key issues together is a single thread: the need to make a safer future, and a better future, for this region – and the world.

The need is urgent. Just as we must act now to resolve regional conflicts, we must swiftly heal socio-economic despair. It's true that in the Arab world, there is much less extreme poverty than in other developing regions. However, there are still too many people in need, too many unemployed and more young people facing these harsh realities every day.

Indeed, half of the Arab population is younger than 18. These young people, like young people everywhere, deserve a future they can prosper in, a future with opportunity and hope. Cut off from that opportunity, is it any wonder they doubt the good of globalisation – or the goodwill of the developed world?

To change this, we must act. And I believe that action begins at home. We in Jordan – and many others, throughout the Middle East – are working hard to create a civic environment in which our people will thrive. The basic requirement is an inclusive, democratic civil society – one that guarantees rights, delegates responsibilities, honours merit and rewards achievement. The foundation stones on which we build are peace and stability, basic civil and political rights, essential services, freedom of expression, and the rule of law.

As many of you know, just this week, Jordan held Parliamentary elections. One hundred and ten new members of the Lower House will be joining the country's 55 Senators in working together for Jordan's future. Countless other Jordanians are on the same mission. Public officials, who are spearheading a new ethos of service and efficiency. Private-sector leaders, who are reaching around the world to create new and innovative business. NGO and community leaders, who are safeguarding children, empowering women, protecting the environment; and much more.

To affirm our commitment to human rights, we recently established the National Centre for Human Rights, as well as an independent Higher Media Council. This is our Jordan – a country that is working for accountability, transparency, and peace; a country, proud of its Islamic heritage, and facing the future with confidence.

I have taken the liberty to invite some of our young achievers to join us in these meetings. They are students from Jordanian universities, who represent the kind of excellence our country is working hard to nurture. I hope you will take the time to meet and talk to them – engage them in dialogue, hear their views, and take a moment to encourage them. Because these young people are the future, not only of Jordan, or even our region, but the world.

The fact is that in our borderless century, no country and no region can prosper in isolation. Every country has a responsibility to work for justice, peace and opportunity. But at the end of the day, success will come only when all nations work together to ensure these values on a global scale. This is the true partnership for human development, a partnership based on

shared ideals and shared fates; a partnership empowered by a commitment to mutual respect and genuine dialogue.

This global partnership and dialogue is the strength of this forum – its not-so-secret weapon in the fight against poverty, want and terror. As these problems transcend regions, so must solutions. Your global perspective is the “force multiplier” that real answers need.

In fact, many key players in global development are right in this room. Some of you were involved in the international commitment to slash poverty in the least developed nations. Others have been involved in private-sector efforts to lessen the human costs of globalisation, and ensure access to its benefits. NGOs and public-private partnerships are working more effectively than ever to address global crises and problems.

Over the next few days, I ask you – who come together from so many professional fields and national experiences – to bring your insights to bear on our current agenda. I am confident that, working together, talking together, learning together, we can make a difference.

My friends,

Never have we been more in control of our fate. At no other time have we had such clear choices in our actions and decisions. And certainly, at no other place, can we better hear the cries of those who so desperately need us to succeed.

With a prayer for new beginnings, with faith in new freedoms and with hope for new partnerships, the people of the Holy Land welcome you.

On their behalf, I thank you very much.

Remarks by His Majesty King Abdullah II

At the Council on Foreign Relations

US Washington, DC

18 September 2003

Thank you, Mr. Haass, President of the Council on Foreign Relations. I appreciate your kind introduction. And thank you all. I am delighted to have the opportunity to join you. This council has actively worked for a better future for the Middle East and the world, sometimes at great sacrifice. I hope you will allow me to express Jordan's sorrow on the loss of one of your own, Council Fellow Arthur Helton who was killed last month in the bombing of UN Headquarters in Baghdad. He is mourned not only by the people who knew and worked with him, but by the many in the Middle East who drew hope from his work for refugees and humanitarian affairs.

Like so many Americans, we in Jordan have also experienced the high price of terror this year. Jordanians were killed and injured in the UN bombing, and two weeks before that, in the bombing of our embassy in Baghdad, and again, before that, in the al Hamra Housing Complex in Riyadh last May.

The friends of peace are truly on the front lines now, and it is vital that we hold that line. Peace needs our victory, if we are to enjoy an open and secure future. That's true for the Middle East, of course, but it is also true for the entire global system in which your country and mine take part. The question facing us is whether the 21st century will meet its full promise to humanity. And our actions now will play a large role in the answer.

Let me say that Jordan is proud to play a significant role in the global alliance against terror – in revitalising the Middle East peace process and in promoting regional development. We are also engaged in a rigorous process of domestic reform – a process that began some years ago, and is now accelerating.

Our basic aim is a society that empowers its people, and offers opportunity to all. That means an inclusive, democratic civil society, one that provides real hope. To achieve this, we are taking action on a broad spectrum of issues. We have invested heavily in education. To spur growth, we are empowering the private sector to be a full participant in the economy. And we are building a more responsive, efficient public sector.

Of course, for reform to last, democratic consent must be built right in. As some of you know, there were extreme regional uncertainties after September 11, which caused our parliamentary elections to be postponed. I publicly pledged that Jordan would hold elections as soon as possible. And I am pleased to say that elections were held, last June. Political participation was actively encouraged, and in the event, voter turnout approached 60 per cent. That is, I understand, above the average for the most recent congressional elections in the U.S.

Democracy, of course, is not an event. It is a process. We know it doesn't happen overnight, and it involves many more elements than elections. A key aspect is respect for human rights, civil liberties, and the due role of women. I am committed to protecting and accelerating these objectives. Jordan has established a new Center for Human Rights, as well as an independent Higher Media Council. Women's representation was guaranteed in the new Parliament.

The course that Jordan is charting is intended to meet our people's expectations and needs, but it can have a larger impact, as well. I believe we are creating a model process, a model that can benefit our entire region. The basic template is designed to offer real solutions to real needs – political and economic stability, economic growth, and genuine social empowerment. The Jordan model builds on our society's strengths, values and history while it reaches out to global opportunities. I believe this model can be an effective path toward democracy and prosperity, for a region that is tired of dead-ends and despair.

Central to Jordan's identity is that of an Arab and Islamic country. What does that mean? Extremists, within the Muslim world and outside it as well, will tell you that Islam teaches intolerance, condones – even demands violence – and rejects modernisation and progress. Jordanians will tell you that this is, plain and simply, false.

The truth is that from its very earliest days, Islam has called on its faithful to lead lives of peace and tolerance. Far from sanctioning the killing of innocents, our faith condemns it. Long before the 20th century's Geneva Conventions on war, Muslim soldiers were given strict rules of conduct to protect civilians. Generations of Muslim schoolchildren learn a famous speech of the Prophet's first successor, Abu Bakr. He commands integrity, forbids the killing of innocents of any faith and bans wanton destruction. “Do not betray, do not deceive, do not bludgeon and maim, do not kill a child, nor a woman, nor an old man,” he instructed. “Do not burn; do not cut down a fruit tree. ... if you come across communities who have consecrated themselves to the Christian church, leave them.”

Like millions of other Muslims, I was taught the ideals of honour, justice, tolerance and mercy; they remained my most basic principles when I became a soldier, and I still follow them today.

It is also untrue that Islam forbids its believers from engaging constructively in the modern world. The Quran and Hadith – traditions of the Prophet – support a dynamic faith of discourse and interpretation. From the earliest times, believers were called on to discuss, reason and apply the principles of their faith to the real world around them. The Golden Age of Islam was built upon a rationalist, liberal tradition, and it created a thriving, multi-ethnic civilisation. Islamic scholars set milestones in medicine, astronomy, science and social justice that paved the way for the European Renaissance. Great Arab cities provided refuge and new ideas to travellers from around the world. Muslim, Christian and Jewish scholars, like the great Jewish philosopher Maimonides, worked together in the royal courts.

In the 14th century, a new kind of orthodoxy came to power, which closed the door on debate and discovery. Yet the age-old, positive traditions of Islam never died. And today, they provide another path – a path that respects diversity, pioneers new ideas, and empowers its people. It is this path, which inspires Jordan's reforms, and this path demands we speak out against hatred, and for peace.

My friends, if there were no other reason, Jordan's Islamic values would still make us want to take the lead against extremism and terrorism. But we are also awake to a special heritage. From our soil, the Levant, faith in one God – the united belief of Judaism, Christianity, and Islam – took root and spread across the world. Today, we believe our soil can also be the seedbed of new tolerance and hope.

Today, the vast majority of the world's Muslims are people of peace. So, the question might be asked, how does extremism arise? As in all matters that involve religion, politics, and



society, there is no easy answer. But one thing is clear: too many of our people, especially young people, feel great despair. They are cut off from the opportunities that make the 21st century so promising. They are demoralised by the lack of development and reform. And they are deeply embittered by the continuing occupation of Palestine. Many feel that the failure to end this injustice, an injustice that is so deeply felt by the Arab people, both Christians and Muslims means that Americans are indifferent to their suffering. Ongoing violence, in Iraq as well as in Israel and Palestine, fuels the fires of radicalism. To end terror, to find global peace, we must heal these causes of division, and create new sources of hope.

Ours is a time of genuine possibilities for progress. But we must act now.

In Iraq, it is urgent that the friends of freedom win the peace. That means more than economic reconstruction; it means establishing a credible, legitimate government. The formation of the Interim Governing Authority in Iraq is a positive step in the right direction. But the ultimate objective must be a political process that will lead to an Iraqi government that is freely selected by the Iraqi people.

It is also urgent that we resolve the central crisis in the region, and that is the Arab-Israeli conflict. This cycle of violence remains the region's major obstacle to peace and development. Palestinian suffering has become a worldwide recruiting poster for extremist terror. It is time to shut the recruiters down.

Three months ago, in Aqaba, Palestinians and Israelis affirmed their sincere intent to pursue the road to peace. The roadmap has been sanctioned by the international community. To the Israelis, the roadmap offers collective security guarantees by all Arabs; a peace treaty and normal relations with Arab states; and an end to the conflict. To the Palestinians, it offers an end to the occupation; a viable, independent state by 2005; and the promise to live as a free and prospering people.

Implementing this will take more than words. It will take action. I need hardly say that so far, we have seen only modest steps. And these modest steps have all been actions that we've seen before – actions that could be, and were, later reversed.

What is needed instead are steps that will place the roadmap on an irreversible course to Palestinian statehood, Israeli security, and prosperity for all in the Middle East. This will take real commitment, commitment that will test not just our resources but our leadership as well. And we must act now. Each time the process falters, we draw dangerously near to a time when, regardless of the good intentions of all, the President's objective of a two-state solution will no longer be viable. There must be no more missed opportunities.

My Friends,

We are now well on our way, into a new century. And across the globe, we face stark choices. One vision is of freedom and openness – a human community based on respect for others and growing opportunity. Opposed to this vision is another: a world order that is based on violent disorder – the path of division and decay.

Those who believe in peace must now stand together. To you, I say: you can count on Jordan. In the war on terror, our countries have a strong strategic relationship; part of a significant global alliance, and it is succeeding. And, as we fight against terror, we are also working to deliver on something better – the promise of moderation, freedom and reform.

Today, the people of the Middle East are searching for new hope, hope for a future of prosperity and peace. We have seen the danger and destruction of violence, hatred, and injustice. But we have also seen what people can achieve when they are empowered, when they communicate, exercise their creativity, build knowledge and reach out to others.

This positive course is the one we have set in Jordan. But we are also looking to you, our partners and friends. Together, I believe that we can succeed in creating a 21st century of justice and peace.

Thank you very much.

Remarks by His Majesty King Abdullah II  
At the Swedish Institute of International Affairs  
SwedenStockholm  
08 October 2003  
Your Majesties,  
Your Excellencies,  
Ladies and Gentlemen,

Thank you. It is an honour and pleasure to join you. I am grateful to the members of the institute for this opportunity to share some thoughts with you and to contribute to what I believe is a very important dialogue between our countries.

The Swedish model is evidence of the strong, positive impact that a determined people can have on world events. Your country is a global leader in promoting and protecting human rights. Sweden has played a major role in promoting peace and development, not only in Europe but around the world. Swedish business has won an international reputation for quality and innovation. And your leaders are honoured everywhere for their courage, integrity, and sacrifice. Over the decades, Sweden gave the world Count Folke Bernadotte, Dag Hammarskjöld, Olof Palme, and Anna Lindh ... and millions mourned with you their passing.

Your country has achieved its reputation despite the fact that it is not the largest country or the richest or the most populous. It achieved its standing, I believe, because of its moral energy and commitment to humanity - a deep commitment to recognising the equal dignity of all peoples ... whether in one's neighbourhood or across the world.

Many years ago, the noted Swedish economist Gunnar Myrdal said something interesting about this moral commitment. He was speaking about the need for developed countries to take action, to help end the deep division between rich and poor nations. But, Myrdal argued, such aid would never be sufficient if it were only given for reasons of national interest. Action had to have a moral dimension as well. Policymakers, as well as citizens, need to think in terms of "human solidarity and compassion."

Today, people understand, more than ever before, how interlinked our world is. We still face deep global gaps ... between rich and poor; free and unfree; on-line and off. Yet events have shown developed and developing nations alike, that we do not live in isolation. We share a common fate and future. In the 21st Century – for all nations – "national interest" itself has a moral dimension, because we cannot fully succeed unless we accept our common humanity.

It is because Sweden understands this reality that your country has become such a global powerhouse of ideas and impact. And your success has a special resonance in Jordan. We too are far from the largest or the richest or the most populous country in our region. But we believe that with determination, with energy, we can achieve our own impact, at a critical time.

Today, Jordan has committed itself to a path of development, progress, and peace. We have spoken out, boldly, in the name of tolerance and justice. We have taken risks for peace in our region and around the world. And we have embarked on an extensive programme of economic, political and social reform.

Jordan's basic goal is a society that empowers its people, and offers opportunity to all. That means an inclusive, democratic civil society, one that provides real hope and real solutions – political and economic stability, economic growth, and genuine social empowerment. We know this is not a one-step, simple path; it requires structural reforms throughout society. But that effort is underway, and it is accelerating. I believe we are creating a model process that can benefit the Arab world as a whole; a model that can be an effective path toward democracy and prosperity, for a region that is tired of dead-ends and despair.

The Jordan model reaches out to take advantage of global opportunities and partnerships. But I must point out to you that its roots are in our own society's strengths, values and history. Central to this heritage is Jordan's identity as an Islamic nation. This identity provides us with core, positive values – values like tolerance and acceptance of others; concern for the oppressed; respect for men and women alike. From Islam's earliest history, these are the values that enriched our culture, inspired scholarship and scientific advances and created a

thriving, multi-ethnic civilisation. And, as we move into the future, these are the values that will create innovative, knowledge-rich, opportunity-enhancing societies.

I know that this is not the description of Islam you will hear from extremists, or from those who hate Islam. But they are wrong – as wrong as those who believe that the world's civilisations cannot meet and work together. Indeed, Sweden's own experience shows that a people can deeply love their own traditions and culture, while opening their minds and doors to others. Sweden is now home to some 300,000 Muslims – people of peace, like the majority of Muslims worldwide, people who are playing active roles in their communities, nation and world.

It has never been more important than today for our people to reach out to each other. If we are to create a future of freedom and opportunity for all, we must strengthen our ties and work together more effectively.

In Europe, barriers to the free flow of goods, capital, and people have long been removed. Human rights; democratic, pluralistic values; and social welfare are, more and more, continent-wide concerns. This infrastructure of ideas binds European countries, and it also provides a framework for its partnerships with other nations and regions.

One such partnership is the one between Europe and the countries of the Southern Mediterranean. The ongoing Barcelona Process commits our regions to work together for peace and stability, improve mutual understanding and tolerance, and create shared economic prosperity. This partnership is vital for both regions' futures.

I am proud that Jordan was the first Mashrek country to conclude an Association Agreement with the EU. This partnership between our countries reflects our shared values, and the positive benefits for our countries of increased cooperation. An important step is the progressive creation, by 2010, of a Free Trade Area between Jordan and EU countries. Europe is Jordan's major trade partner – and let me say that Sweden plays a significant and welcome role.

We believe that we can increase trade volumes with Europe – right now, these are about a third of our imports and less than four percent of our exports. We are also grateful for the support that we receive from the union during this period, as reforms transform our economy in the lead-up to the free trade area.

Jordan is committed and on the path to an open, thriving economy. But let me speak clearly. My friends, the Middle East cannot fully experience reform and development, and our global system cannot be fully secure until two critical conflicts are resolved.

In Iraq, it is urgent that the friends of freedom win the peace. That means swift, effective reconstruction and the establishment of a credible, legitimate government. The ultimate

objective must be a political process that will lead to an Iraqi government that is freely selected by the Iraqi people.

Now and in the months ahead, humanitarian aid is essential for the healing. I know that Sweden has actively contributed, and for this, may I say, thank you. Your concern and your actions send an important message throughout the region, a message of justice and humanity.

The international community must also solve, and solve now, the central crisis in our region – the Arab-Israeli conflict.

Stagnation in the Middle East; extremism around the world – these are products of a cycle of violence that has dragged on far too long. Efforts to promote moderation and offer new hope cannot fully succeed while this conflict continues.

People on both sides of the conflict desperately want peace and security. And four months ago, in Aqaba, Palestinians and Israelis affirmed their sincere intent to pursue the road to peace. The roadmap has been sanctioned by the international community. To the Israelis, the roadmap offers collective security guarantees by all Arabs; a peace treaty and normal relations with Arab states; and an end to the conflict. To the Palestinians, it offers an end to the occupation; a viable, independent state by 2005; and the promise to live as a free and prospering people.

The roadmap must now be implemented. That will require real commitment, from the international community as well as the parties – commitment that will test our leadership, resources, and yes, our deepest morality. We cannot afford any more missed opportunities.

My friends,

Today, the people of the Middle East are searching for new hope, hope for a future of prosperity and peace. Over sixty per cent of the population of the Arab World is under 25 years of age. Our young people, like yours, deserve to fulfil their hopes, and not be held hostage to the past.

We have seen the danger and destruction of violence, hatred, and injustice. But we have also seen what people can achieve when they are empowered, when they communicate, exercise their creativity, build knowledge and reach out to others.

It is up to all of us, working together, to create the promise of the 21st Century ... a world of freedom and openness ... a human community based on respect for others and growing opportunity. Prosperity and peace require us to reject the politics of isolation and division. Only a new partnership, the partnership of human solidarity, can succeed.

Thank you very much.

Remarks by His Majesty King Abdullah II  
At the World Economic Forum Annual Meeting  
Switzerland/Davos  
23 January 2004

In the Name of God, the Most Merciful, the Compassionate,

Thank you, Professor, and thank you all. Let me say what a pleasure and an honour it is to join you again and to participate in these sessions. We are deeply grateful to you, Professor, for making this kind of global exchange a world-shaping force for the 21st century.

And let me say too, that Jordanians are extremely proud of their partnership with your institution. The Jordan Valley hosted the forum's successful extraordinary annual meeting last June. And we are looking forward to welcoming all of you, again this year, when the forum meets at the Dead Sea in May. I invite you to join us to articulate our shared determination to bridge divides, build trust and forge ahead with the new vision of peace, security and prosperity.

Friends,

Every meeting of the forum these days seems to come at a time of special challenge. It has been fifteen years since the end of the Cold War, and we are still struggling to create a world of security and freedom. Conflicts and crises, of poverty, violence and division, have shadowed our new century's promise. Yet, in this week's meetings, and in many other multinational arenas, you will hear a tremendous amount of consensus on core solutions. People know what is needed and how to achieve it. In politics, economics and the environment, in science, technology and society, there's been a global march forward, despite the world's problems. We agree on the urgency of bridging global economic and cultural divides, expanding development and building democracy. There is equally broad agreement on security issues, on the need to deal with regional conflicts, address the proliferation of weapons of mass destruction and unite in the face of terrorism.

Friends,

The time has come, however, to turn the emerging moral consensus on global development and security into practical and genuine achievement. Today's global dialogue must become a partnership for action, for a new political will, and new mechanisms that will make our commitments real.

Peace, equity and justice, are not just lofty goals. They are critical to the security of every nation, the success of every private enterprise and NGO, and the opportunities and hopes of every individual. These are the foundations of an open, global society. And that world is put at risk every day that we waste by inaction.

I am a believer in specifics, so let me suggest a few. First, conflict resolution. Recent history in Iraq, the Balkans and elsewhere, clearly shows the need to strengthen the multilateral political system. International structures should be made robust enough to do the job we ask of them, helping to broker peace and build nations.

We should also be closely coordinating international security arrangements within a collective approach. This would allow us to take the lead in setting the priorities in the war on terror.

In the economic dimension, we all know that opportunity is a powerful force in giving people a stake in a peaceful future. It is in our hands to create a global growth economy, access to education and technology, and, most important, justice, to show young people, that ours is a world of fairness, openness and hope. The Millennium Development Goals need to be reinforced with new benchmarks for assessing progress, for ensuring better and fairer trade, and for forging new global links.

This kind of commitment to cooperative, dynamic action, is very real to many of us in the Arab world. We know that we must make tangible strides in human development, for the sake of our people and for the sake of our future. Today, the average growth in the region is slower than other developing countries. At the same time, with more than half of the Arab population under the age of 18, almost 6 million new job seekers enter the labour force each year. Average unemployment rates are now above 15 per cent. This means that there are not enough jobs and there is not enough hope.

It takes all sectors to address these issues. A responsive, transparent governance, an educational system dedicated to excellence, and a vigorous private sector that can harness the region's tremendous human potential.

Recently, the Arab Business Council of the World Economic Forum has brought together private-sector representatives from across the region. In Aqaba last month, the council drafted a blueprint for action to support economic growth. I understand that it has been adopted here at Davos. It includes initiatives for educational and judicial reform, and an explicit call to governments to commit to openness and freedom. The Arab Business Council is also building bridges with other private sector groups around the world.

Next month, members of the council will join me in Malaysia to cement an emerging partnership with the New Asian Leaders, a new body of the World Economic Forum, officially launched earlier this morning here in Davos.

But we all know that economic remedies on their own cannot yield long-term results if they are not paired with serious political and social liberalisation. Initiative, excellence and innovation cannot take hold in closed societies.

Friends,

We cannot talk about growth and stability in my region, or the globe, we cannot take effective action for reform and development, without addressing a core conflict that threatens our world, the long and hateful cycle of violence between Israelis and Palestinians. As in other global concerns, the world knows the right thing to do. Last year, both parties and the international community recognised the path set forth by the Arab Summit resolution and the Road Map. This initiative provides clear principles and mechanisms for a just and lasting solution: two secure states, Israeli withdrawal from the Palestinian territories and dismantling of settlements, two capitals in Jerusalem, and an agreed solution to the refugee issue. This is the unavoidable road to peace.

Now, with every day of delay, there is harm to the region and the world. For those involved, much is at stake: families and communities destroyed, and youthful hope that is lost to poverty and despair. For the international community, there is also a lot at stake, the future of global peace, and the credibility of the world's commitment to global justice. The international community cannot afford to let the collective suicide of Palestinians and Israelis feed rage and violence in the region and the world. That means rejecting terror, but also condemning repression. And it means moving forward with determination, to achieve a just and lasting peace. It is an effort that requires the active leadership of the United States, and a collective international alliance for peace. It would be in tune with the desires of the overwhelming majority of Israelis. It would garner the support of the Arab states and Europe for the Palestinian leadership. It would in fact measure our collective resolve to translate the global moral consensus into a genuine practical achievement.

Friends,

Today we face challenges in my region and around the world, but we also face unprecedented promise. Billions of people stand at the brink of new possibilities. This is what makes any failure so bitter, and the sense of urgency so great. It is in our hands today to create not simply promises, but deeds. An era of peace, a global growth economy, expanded access to education and technology, and most important, a world of justice.

The future belongs to those who see the world in its full dimensions, an undivided sphere. On such a globe, every point is a centre, and every centre is a person, entitled to prosper and succeed, in peace and security. So let us defy separation and isolation. Let us avert the clash of civilisations, and help the overlap of cultures. Let us partner for peace. But let us act now.

Thank you very much.

Thank you very much. Peace be upon you.

Speech of His Majesty King Abdullah II  
At the 40th Munich Conference on Security Policy



Germany Munich

08 February 2004

Thank you, Professor, and thank you all for your kind welcome. It is a pleasure to be in Munich once again, and an honour to be part of this forum.

Our topic, the future of the Middle East, and our dialogue are both important. Today, the Middle East is on the frontlines, perhaps it is the frontline, of a global struggle for peace and development. In solving long-term conflicts, in achieving genuine development and reform, in living up to the values of our faith and heritage; in all these ways the Arab world is engaged in a great enterprise. The results will impact the entire world. And we who are on that frontline look to the friends of peace and freedom for your support and partnership.

Today, I would like to give you a brief situation report. Let me begin with the core challenge: ending the Arab-Israeli conflict. Given the headlines from elsewhere in the region, some of you may wonder if this is, indeed, still at the core. Let me assure you, it remains central to the region and the world. No other conflict has cast such long shadows on our globe, or been used to cause such division, or promoted such bitterness. The time has come to put a stop to the long and hateful cycle of violence.

In fact, the contours of a historic reconciliation are before us. It involves a two-state solution, in which an independent Palestinian state lives in peaceful coexistence alongside a secure and recognised Israel within the 1967 frontiers. As you know, the Arab League collectively endorsed this proposal with full normalisation between the Arab countries and Israel. Mainstream Palestinians accept that the refugees' right of return must not undermine the demographic balance of Israel. Mainstream Israelis understand that they cannot be occupiers of another people.

A Palestinian capital in Eastern Jerusalem would be matched by an Israeli capital in Western Jerusalem. This is the unavoidable road to peace. The parties know it. And the extremists know it. They are doing what they can to stop forward movement. And with every day of delay, there is harm to the region and the world.

For us in Jordan, the crisis in Palestine is very near. From parts of my country, at night you can see the lights of Jerusalem. Every day, our people know the suffering that is going on. And we experience the destructive regional impact of the conflict. So, Jordan has been a leader in the search for peace. For decades, we have taken the risks that peace requires. And we are committed to helping achieve a real resolution.

But, friends, neither the parties, nor their neighbours, nor the region can do it alone. The international community has a crucial role. To achieve a just and lasting peace requires the active leadership of the United States, and more, it requires a collective international alliance for peace. We share a commitment to peace and stability. We share respect for human dignity and security. Now we must share the leadership in achieving these values. Such an alliance can secure the future of Palestine and Israel, bolster peace and stability in the Middle East

and promote the security interests of free nations worldwide. It is time to act, and time to succeed.

This brings me to a second regional challenge, the challenge of development. Reports show that per capita income has actually shrunk in the Arab countries during the last 20 years. One of every five Arabs lives on less than \$2 a day, and in the labour force, one in seven is unemployed. Youth, who are more than sixty percent of the population, can be especially vulnerable. When young people lose hope, they can turn to apathy or violence, and either course threatens the drive for reform and the move towards modernity.

It takes a collective Arab effort to address these issues. And, indeed, historic opportunities are before us. They include educational systems dedicated to excellence, responsive, transparent governance, a vigorous private sector that can harness the region's tremendous human potential and other positive programmes.

We look to ourselves to create our own future. But our friends around the globe can also make a vital contribution. When the international community supports those of us who are engaged in reform, when it supports development, it helps create a climate of justice and hope – the necessary environment for security in the region and the world.

Hope is not merely material. This leads me to say a few words about the Islamic faith that is central to Jordan's identity. Recent years have brought new dialogue in the West about the nature of Islam. Some believe that Muslims are forbidden from engaging constructively in the modern world. Jordanians will tell you that is untrue. From its earliest days, Islam pioneered a path that respected diversity and tolerance, promoted new ideas and empowered its people. This is the true Islam, and these values are why Jordanians speak out against hatred, why we were among the first to condemn 9/11 absolutely and without reservation, and why we have taken the lead against extremism and terrorism.

Jordanians partake of a special heritage: From our soil, the Levant, faith in one God, the united belief of Judaism, Christianity and Islam took root and spread across the world. I believe that what is taking root in the Middle East today can also impact the world. If we succeed, and success will require all of us, this may be a century in which billions more people have access to the world's promise.

Professor,  
Friends,

No discussion of the future of the Middle East can be complete without addressing the prospects for Iraq. Here as well it is urgent that the friends of freedom win the peace. That means more than replacing the old failed structure. There must be sustainable security, security in which Iraqis are able to resolve their own problems peacefully. It is not a question of how fast an election is held, but how well the governing institutions are built. It is the substance, not the pace of change that will ultimately define success.

As Iraq's neighbours, we bear a specific responsibility: to do all that is in our capability, to help the men and women of Iraq achieve the foundations for self-determination. This is the path to a free and prospering future, one that can benefit Iraqis and help opportunity flourish across the region. It is the path to Iraq's historic place: a great country, of knowledge and opportunities, within the family of Arab and Middle Eastern nations.

My friends,

We are now well on our way into a new century. It was entered, in the words of UN Secretary General Kofi Annan, "Through a gate of fire." Ahead lies the promise of freedom, human rights, global justice and development – if we make the right decisions now.

Those who believe in peace must stand together. To you, I say: you can count on Jordan. As we fight against terror, we are also working to deliver on something better, the promise of moderation, freedom and reform. We are working for new hope, hope for a future of prosperity and peace. As that future takes root and flourishes in my region, it will spread its benefits throughout the world.

In a recent speech, US Secretary of State Colin Powell said, "We fight terrorism because we must, but we seek a better world because we can". And I am sure that you all agree, for the aspirations of men and women across the world are much the same, and so should their opportunities be. We must now deliver on that promise, and work together to face the risks and the new dangers.

Jordan is reaching out to you on this agenda. We want your support, but we also want to support you in the march towards our common goals. For what we are facing, is indeed, a shared destiny but more importantly, a shared commitment for freedom, security and peace.

Thank you very much.

Remarks by His Majesty King Abdullah II

At the Commonwealth Club "The Road Ahead: the Need for Vision and Visionaries"

US San Francisco, California

16 April 2004

Thank you, Richard. I am really grateful Mr. Shultz for your kind words; and thank you for the Key of the City of San Francisco, Mayor Newsom. Thank you all for your warm welcome. I am honoured by this award. And I hope you won't take it back if I tell you that I'm afraid I don't qualify any more. I am on the other side of 40. They say mine is the age when there is nothing left to learn the hard way ... but I'm not sure that's right.

So I hope you'll just take me as I am – and accept my deepest thanks. It is a pleasure to be here in San Francisco, and a great privilege to be part of a Commonwealth Club forum. We

are meeting here some 101 years after this Club was founded. That's over one hundred years of debate and discussion on every major event of the 20th Century and now, the 21st Century as well.

The people who founded the Commonwealth Club could not have known the vast changes that would happen to their world. But they had a more important vision: they understood the power of knowledge, and the need for dialogue, and the role of responsible citizens in shaping the world.

Now we meet together to look ahead. And I can guarantee you that even if we don't know what the earth will look like a hundred years from now, we do know one thing: dialogue, and discussion, and citizenship – on a global scale – will be key to getting it right.

These are indeed testing times. The great threat of nuclear confrontation between rival superpowers is behind us. But a new constellation of challenges has arisen: weapons of mass destruction ... global terrorism ... violence and war ... health and environmental problems ... global economic and financial crises.

Yet there is also terrific promise. Breakthroughs in human knowledge, innovation, communication and education ... new tools for economic development ... a new willingness to challenge old assumptions and divisions. These all give us new opportunities, opportunities to move in new directions and create real solutions for our world.

Ours is the most information-rich, instantaneous, borderless time in the world's history. Creative thinkers, entrepreneurs, humanitarians and risk-takers have the power to transform people's lives – not just in one small corner of our world, but everywhere. This gives us a special responsibility; a responsibility to act together in the common interest, a responsibility to make sure that all people share in the promise that our new century offers.

Creating that new promise requires vision and visionaries, gifted leaders who see the patterns in our world's chaos – and use their vision to illuminate and inspire others. Futurists like Cisco CEO John Chambers, who knows technology can help bridge the gap between rich and poor. Wise men like UN Secretary General Kofi Annan, whose words and deeds are lighting a way to a more just and safer world. Moral guides like Shereen Ebadi who won the Nobel Prize for Peace last year, and seeks to establish dynamic roles for Muslim women.

In my part of the world, like yours, we are looking to such visionaries – people with the courage to visualise positive change, and the commitment to achieve it. That is the legacy of our greatest peacemakers, my late father, His Majesty King Hussein and the late Yitzhak Rabin.

King Hussein's unceasing energy made Jordan a leader in the search for justice and progress. Today, we and you have a chance to take that process forward. That means articulating a clear, positive vision for the Middle East. It means renewing the values so eloquently taught

by the three faiths that came out of the Holy Land. And it means a genuine commitment to act to make peace real.

My friends,

It is time to break out of the cycle of violence, a cycle that continually takes us back to a past of despair and division. For Israel, it's time to end the occupation and stop the futile effort to humiliate Palestinians into submission. For the Palestinian leadership, it is time to act responsibly for peace and reform their political institutions.

For both parties it is time to listen to the people, Israelis and the Palestinians, who tell us so clearly: "Give us security, peace and justice." Israel needs to take the risk for a peace that would create two states, living side by side. The United States needs to clearly and explicitly commit to a Palestinian state.

Some observers are pessimistic about the near future. They question the willingness of the United States to re-engage seriously in the peace process and press for the implementation of the Road Map, prior to next November's election. They predict the collapse of the Palestinian Authority and an end to the prospect of delivering a two-state solution.

There is good reason to disagree. We are witnessing changes in the Arab world that are removing all strategic security threats to Israel. The Arab peace declaration commits all Arab countries to accept peace with Israel, and a balanced lasting solution to the conflict. It also provides for collective security guarantees for Israel, for an end to the occupation and the creation of a viable, independent Palestinian state. It calls for an agreed solution to the refugee question, and a Jerusalem that is shared and open to all faiths. This is the future that would give both Palestinians and Israelis the security and peace they need.

Friends,

If the common ground we used to stand on no longer seems solid, let us seek new common ground for our collective efforts. Now we need success, and success requires the active leadership of the United States, and a collective international alliance for peace.

In my region, the stakes are plain. For far too long, the Arab-Israeli conflict has cast its dark clouds over regional development. The Middle East desperately needs peace, prosperity and modernity. To address these issues will take new vision, and brave visionaries. Visionaries who can foster responsive, transparent governance ... dedicate our educational systems to excellence ... and encourage the vigorous private sector that can harness the region's tremendous human potential.

Such reform is in our own hands, and I can tell you, it is underway. But what we do is greatly affected by what the international community does and doesn't do. Your support can encourage reform. Even more important, your actions can nurture peace and justice in the

region – creating an environment that offers hope to our young people and lets them share in the world's promise.

We in Jordan are already committed to the work of reform. It's driven by a vision, a vision that builds on our society's strengths, values and history, while it reaches out to global opportunities. And we are succeeding. Jordan has a workforce that is now, per capita, more computer-literate and entrepreneurial, and better educated than most of the developing countries. We are embracing innovation and enterprise. Jordan is the first Arab country to sign a free trade area agreement with the United States of America. That agreement has already started contributing to economic growth and opportunity.

Thanks to these and other efforts, my country is in a good position to seize the opportunities of the new century. I believe that the Jordan model can be an effective one for our entire region. And success in our region can pave the way for a global expansion of security and peace.

The challenge ahead is a big one, and the voices of despair and division are very, very loud. But with vision, with visionaries, I believe we will prevail. We can raise the voices of reason and dialogue. We can deliver the benefits of this century to those who are less fortunate. We can bring peace and security to those who are suffering. And if we do, when we do, we will make this time of conflict and uncertainty into a real age of opportunity and promise.

Thank you very much.

Speech of His Majesty King Abdullah II  
Statement at Rose Garden  
US Washington, DC  
06 May 2004  
Mr. President,

Thank you for this opportunity to meet with you today and discuss vital issues of mutual interest to both our countries.

I remain very concerned about the critical phase our region is passing through. It is very important for the moderate voices seeking peace in our region to prevail, so that we can break out of the cycle of violence which has held us back for too long, and put the region on a new path to stability and prosperity.

I would like to outline the Jordanian position on the peace process, particularly in view of recent developments. We feel that any unilateral Israeli withdrawal from Gaza and the West Bank should be part of the road map, and should lead to the achievement of your vision of a two-state solution.

Let me stress that a viable, sovereign, and independent Palestinian state on the basis of the 1967 borders is also in Jordan's national interest. Failing to achieve such an outcome will invoke other options all of which will endanger my country's interests and that of the Region. This is one of the reasons why Jordan insists on a two-state solution, and why it supports the road map as the mechanism to get there. Jordan remains committed to a final and comprehensive permanent status agreement based on the foundations of the Madrid conference, the principle of land for peace, UN Security Council Resolutions 242, 338 and 1397, agreements reached by the parties, and the Arab Initiative, endorsed by the Beirut Arab League Summit.

Jordan also believes all final status issues, including borders, refugees, Jerusalem and settlements should be a matter for the parties to decide. I am encouraged by what I heard from you today that these issues are not to be prejudiced, and should be mutually agreed by the parties.

In the context of the road map, I want to assure you, Mr. President, that Jordan is ready to do its part in assisting the Palestinian Authority to rebuild its capability and assume full control of the security situation.

Jordan stands shoulder to shoulder with the United States and the international community in our common fight against terrorism. We cannot allow the terrorists political agenda to succeed, and we assure you that Jordan will continue to do its utmost to help win this cause.

Jordan is committed to support Iraqis in their quest to regain their sovereignty, rebuild their institutions, and establish a society based on freedom and democracy. The stability, unity and territorial integrity of Iraq is an objective we both share, and we are determined to achieve it.

Jordan is also committed to a process of political and economic reform in the region. We have adopted a far-reaching plan that addresses the key areas of good governance, political freedoms, women's rights, judicial reform, educational reform, and the liberalization of the economy. We also are strongly committed to a key role by civil society. Our aim is to move towards a system that respects diversity and guarantees pluralism at all times, so that democracy is not used by any who might opt to subject to it once and then deny it to others.

Mr. President, the leadership of the United States is crucial in all our efforts to reach a just and lasting peace in the Middle East. I want to thank you again for this opportunity and I am determined to work with you to achieve this goal in a timely manner.

Remarks by His Majesty King Abdullah II

At the Economic Club of Chicago and the Chicago Council on Foreign Relations

USChicago

11 June 2004

Distinguished Guests,  
Ladies and Gentlemen,

Thank you all for your warm welcome; and Lester, thank you for that very kind introduction. It is a pleasure to be in Chicago. To me, and so many others around the globe, this is one of the world's great cities – a global hub of ideas, of business, of innovation and outreach. Its rich diversity shows the strength of an open society. Its great universities teach the power of reason and dialogue.

And its baseball teams ... well, its baseball teams ... prove the enduring human spirit of hope.

It is a special honour to join all of you this evening. The Economic Club of Chicago and the Chicago Council on Foreign Relations are respected across the world. Your members have helped create a global forum on the most urgent issues of our time: inclusion, peace and prosperity.

That dialogue is critical for the 21st Century – critical, because today, countries large and small, rich and poor are influencing where our global system is headed. As people's actions impact events, so do their ideas, aspirations and relationships. We cannot afford misunderstanding and rejection. We must reach out to each other in open respect. Think of our world as an ocean of multiple, crossing, political and economic currents with intermittent storms. Navigating in this environment demands good communication. And this is especially important when it comes to the future of the Middle East.

As some of you may know, I've just come from the Sea Island meetings of the Group of Eight. For those of us in the Middle East who are working for modernisation and reform, it was a chance to articulate our goals and the changes in our region. For the G-8 nations, it was a chance to explore new ways to support these positive efforts – efforts which will benefit not only the Mid-East, but indeed, the entire global system.

I am pleased to tell you that we had very productive meetings and outcomes. I believe we laid a foundation for a new partnership for progress, one that will support development, peace and stability in the Middle East.

Reform is an essential part of my region's future, and I'd like to say a few words about that. Today, most Arabs agree that reform is vital. Arabs also agree that for reform to succeed, it must emerge from within our own societies. And leadership for such reform has emerged. In support of freedom and tolerance. In favour of transparent, responsive, accountable governance. For a civil society where human rights, gender equality and the rule of law are all respected.

And may I also say these are the deepest values of Islam. They are the historic values that drove the ancient Arab world's humanism, and its pioneering civic development. They are the



values that, today, make millions of Muslims great citizens, here in America and around the world. Indeed, Islam's core values are essential features of healthy, stable democracy everywhere. The equal dignity of all people; respect for reason and law; tolerance; personal responsibility: these and other principles can drive, and are driving, a new era of progress in the Middle East.

I am pleased that in Tunis last month, the Arab League concurred in the need for reform. And today, leadership for regional reform is moving forward. The new partnership of Sea Island will provide needed support for key initiatives. Over the next few months, we will be working together on measures to support entrepreneurship, micro-finance, education, gender equality and democracy.

But we must not think only in terms of individual programmes. There must also be a strong framework – a recovery plan that can give people, especially youth, a sense that they will share in the promise of our time. I'm talking about a Marshall Plan, as it were, for the recovery of the Middle East.

As most of you know, the original Marshall Plan reached out to the people of Europe at a time of tremendous scarcity and despair. It was a time when the forces of a closed world were actively trying to take advantage of people's hopelessness and fear. But the Marshall Plan gave Europeans the support they needed to build strong, free societies. And the great free world alliance that resulted kept liberty secure.

What could be a better description of what is needed now for the Middle East?

Months before the tragedy of September 11, I challenged American friends to consider a new Marshall Plan, one that would give the Middle East the tools it needs to resist the global enemies of tolerance and peace. That plan is needed now more than ever, to give people hope, and offer them an alternative to hate and division.

At Sea Island, we also reaffirmed the need for peace – and soon. This means a just, lasting, and comprehensive settlement to the Arab-Israeli conflict. The details are known and clear: A two-state solution based upon UN Resolutions 242, 338 and 425. A free, sovereign, viable, democratic and contiguous Palestine. Security for Israel to live in peace with its neighbours. A process that will allow for a comprehensive settlement to emerge; one that will also address the Syrian and Lebanese tracks.

My friends, I know that these days our newspapers are filled with other concerns; other bloodshed. We must move forward in building a legitimate, inclusive and effective political process in Iraq. But make no mistake about it: the Arab-Israeli conflict remains the central hurdle to peace and progress in my region, and in the world. While its violence and despair continue, extremists will continue to spread their hatred and division. It is time to listen to the people, Israelis and Palestinians, who tell us so clearly: "Give us security, peace and justice."

The goals I have been speaking about, peace and reform have been a central focus for Jordan. We are at peace with our neighbours. And we have committed to a modern, tolerant, open society.

In the economy, we have encouraged innovation, enterprise and partnership with the private sector. Jordan was the first Arab country to sign a free trade area agreement with the US, and that agreement has already contributed significantly to economic growth and opportunity.

In education, our focus is on empowering youth. Today, whether in busy urban centres or remote desert communities, you'll find students surfing the Internet. First graders are learning English as a second language. University students are learning information technologies and the skills of critical thinking.

The American University of Jordan is one of the initiatives that Rania and I have great hope for. This private, non-profit institution is scheduled to open in 2009. It will be partnered with leading US institutions; it will be open to all students in the region; and it will adopt the standards of world-class scholarship: open inquiry; freedom of thought and freedom of expression.

In these efforts and others, Jordan is showing what a home-grown Arab-Islamic model can accomplish.

My friends,

Great opportunities lie ahead. A world where all people share in the promise of human knowledge; participate in global prosperity and growth and fulfil their human potential. This is our goal in Jordan, and this is Jordan's goal for the Middle East.

It is time that we move forward to peace, stability and development. Together, I believe we have the partnership to succeed. Our region, and our world, deserves no less.

Thank you very much.

Remarks by His Majesty King Abdullah II

At the Anglo-Arab Organisation

UK London

02 July 2004

Thank you, Nadhmi. And thank you all for that warm welcome. I am delighted to be here tonight. Nadhmi, you and your organisation are to be congratulated for all you have done to strengthen Anglo-Arab friendship – for encouraging young Arabs to be great citizens - and for promoting an important dialogue.

The Anglo-Arab Organisation has a critical mission at a critical time. Never has it been more urgent that the British and Arab people reach out, celebrate our shared values, and work together for prosperity and peace.

There was an era when the world's countries were genuinely isolated from one other. Before instant communications and global mobility. When East and West knew each other only at a distance. And what we knew, we often learned by hearsay.

In 1154, the Arab geographer, Al Idrisi, described a mysterious northern place called Angleterre. "This is a great island," he wrote, "shaped like the head of an ostrich. ... Its people are hardy, resolute and enduring. ... The winter there is permanent."

Stories about bad British weather began in the 12th century – who knew?

Well, today, there are more direct opportunities to understand each other. My father, His Late Majesty King Hussein made lifetime friends here. So have I. Our days here opened our eyes, as my father said, to "a different world." And in turn, I hope, we helped others see something of the proud heritage of the Arab world.

My friends, for all of us, these bonds are vital. Ours is a time of tremendous possibilities. Today's global relationships – trade, investment, communication, cooperation – can help our countries meet urgent needs. For new jobs and stable, growing economies. For the benefits of new knowledge. For hope. But our global system is not, cannot be, monolithic. It depends on the strengths of every region; the wisdom of every country; the creativity of every person. We cannot afford misunderstanding and division. We must work in a partnership of respect.

The people of Jordan and Britain have much in common. We believe in the rule of law and the equal dignity of people. We want the best for our children: a world of opportunity and security. We want to make this new century deliver on its promises: justice, prosperity and peace.

We stand together in support of a lasting, comprehensive Middle East peace. That means a free, sovereign, viable, democratic and contiguous Palestine. And it means security for Israel to live in peace with its neighbours. A process that will allow for a comprehensive settlement to emerge; one that will also address the Syrian and Lebanese tracks.

And today, especially, Jordan and Britain stand together in supporting a legitimate, inclusive political process in Iraq – and a new era of peace and freedom for that historic land.

Peace, freedom, tolerance – these ideals are deeply rooted in the British democratic tradition. But they are also the deepest, humanistic values of the Arab world. It is a heritage that created the golden age of Islam – a multi-ethnic civilisation that made historic advances in scholarship and civic development. And today, this Arab Islamic heritage is driving a new era of progress in the Middle East.

In Jordan, an extensive reform programme is well underway. We are determined to help our people achieve their potential in every sphere. In the economy, we have encouraged innovation, enterprise and partnership with the private sector. In education, we are empowering youth to compete on a global basis. In the public sector, we are cementing human rights, streamlining services and building transparent, accountable governance.

Our agenda has one main goal: to meet our people's expectations and needs. But we believe Jordan's path can also show others what a home-grown Arab-Islamic model can accomplish. This is essential if our region is to find an effective path towards economic development and democracy.

Today, most Arabs agree that reform is vital. We also agree that for reform to succeed, it must emerge from within our own societies. And leadership for reform has emerged. Creative thinkers, entrepreneurs, humanitarians and risk-takers are opening new doors to hope. I believe that their dynamic voices can and will drown out the preachers of cynicism and hatred who prey on our youth.

In the Arab world, our future is our own to shape. But our friends here in Britain and elsewhere have a vital contribution to make. International support is essential to resolving the core Arab-Israeli conflict. Until that happens, the forces of division and despair will fight regional progress. When you help right wrongs, when you invest in development, when you encourage reform – you create a climate for positive change. You tell our young people: “Global justice is real – the system can work.”

Many years ago at Sandhurst, I was told a story about Field Marshal Alexander of World War II fame. A friend of mine told it, I think, to illustrate typical British understatement. Towards the end of the war, General Alexander paid a short visit to London. He went to his club, where he ran across a very old member who had known him when he was a young officer. “Well, well, Alex”, said the elderly gentleman to the general, “I haven't seen you around in ages – what have you been up to?”

Now this was Field Marshal Alexander – who helped save the British army at Dunkirk – who led the Allied forces in Tunis – who commanded the allied invasions of Sicily and Italy. But when this kindly gentleman asked him, “What have you been up to?” – The general answered, “Oh, I'm still soldiering.”

Well, the fact is, understatement isn't the only message of this story. I think it just might illustrate a man who knew his job.

My friends, today we are all still soldiering: to make our global system work – to create hope and end despair – to defeat terror and renew peace. This is our job, and it deserves our full attention.

It is in our hands to create a world in which every human being can thrive, a world in which all share the promise of our century. This is the hope, indeed the right, of men and women throughout the Arab world.

With God's blessing; with faith in humanity; and with a collective will to act, I believe we can succeed. I ask your help.

Thank you very much.

Remarks by His Majesty King Abdullah II  
At the Moscow State Institute of International Relations  
Russia Moscow  
03 September 2004

Thank you, Rector. And thank you all. It is good to be in Moscow again, and to see so many friends. We come together at a time when the news is very grim. It is, indeed, a terrible and challenging time for all of us who despise terror. My friends, let me say that all Jordanians condemn strongly these heinous terrorist acts against innocents and children. As a father, I can tell you that our fathers and mothers are praying with your fathers and mothers. All our people stand with you in your grief and determination.

Friends,

It is hard to discuss global issues when such a crisis confronts us. But Rector, this university's commitment to peace and advancement can make a real contribution to the solutions we so desperately need. Your university is respected throughout the world for its high standards and its distinguished faculty and graduates. To be welcomed among you is indeed an honour. It is a special privilege to be here during this great institution's 60th anniversary.

Let me add, I do not come here alone. I'm here on behalf of all Jordanians. We feel tremendous regard for Russia and its people. No country has done what yours has done, to tackle tough problems and build a new future. What you have achieved is important, not just to your own people, but to global peace and hope. To me, this respected degree is a token of that partnership. And I thank you.

Faculty,  
Students,  
Distinguished Guests and Friends,

It is more than 15 years since change began sweeping this world. A spirit of reform, of new possibilities and achievements, promised much for our future. Yet deep crises still shadow our globe. The great evil of terrorism. Regional and ethnic conflict. Poverty and deprivation.

Never has it been more important for the friends of peace and progress to work together. To end regional conflict; to unite against terror; to heal economic and cultural divides.

No country understands this more than Russia. Neighbour to West, East and Middle East, your nation has a central role in our world – not just in geography, but in ideas and movements. It is a historic heart, not only of Orthodox Christianity, but of a thriving Muslim community. Today, 20 million Russian citizens are Muslim. Indeed, Russia was represented at last year's global Islamic Conference by no less than President Putin.

We have all seen how extremists are promoting their power agenda. They divide the world into hostile camps, and actively work to build new walls and mental partitions. But – as Russia has shown even at great times of challenge – positive change begins when walls come down, when minds open up, when we reach out to each other in mutual respect. In this regard, I applaud President Putin and so many of you, for rejecting Islamophobia. And I hope you will work with us to bridge this destructive divide anywhere it occurs around the world.

For our part, in the Islamic world, I can tell you that extremists will not silence the real Islam. Ours is a faith that honours tolerance and peace. The Hashemite Kingdom of Jordan well represents that great tradition of inclusiveness and vision. In our country, Orthodox and other Christians live as brothers – and sisters – to their Muslim neighbours. Together, we are all Jordanians and we will not be divided.

Friends,

The values of my country and my faith are driving real, results-oriented reform across the Middle East. As Russia knows well, successful reform emerges from within. The Arab people will not accept measures that are imposed by outsiders, or policies that disregard our history and culture. How can it be otherwise? Only a home-grown process can generate the energy and commitment that success requires.

At the G-8 conference at Sea Island in June, President Putin expressed Russia's full understanding on this issue. The final G-8 statement strongly supported reform emanating from within the region. And it recognised the need to help reformist countries.

Here again, Russia supported Jordan's proposal for a serious funding commitment for a new Middle East recovery plan.

But, reform in the region cannot win the gold unless there is peace on the track. The Arab-Israeli conflict remains a huge barrier to stability and progress in my region, and the world.

For generations, Palestinian suffering has reaped frustration and anger. Global security, global peace, global morality demand that we give this generation a better harvest. My friends, I ask you to help us resolve this issue and help us resolve it soon.

The Arab world is committed to a balanced and lasting solution to the conflict. A free, sovereign, viable, democratic and contiguous Palestine. Real security for Israel to live in peace with its neighbours. A process that leads to a comprehensive settlement; addressing the Syrian and Lebanese tracks.

At Sea Island in June, the G-8 countries reaffirmed their commitment to these goals, as well as to a democratic, sovereign, and rebuilt Iraq. The international community must now deliver on those promises. Let us send a new message to young people – in Palestine, Israel, Iraq and elsewhere: “Global justice is real – the system can work.”

My friends,

The goals I have been speaking about, peace and reform have been a central focus for Jordan. We are at peace with our neighbours. We have committed to a modern, tolerant, open society. To give the entire population a stake in the change process, we have moved steadily forward with institutional reforms: holding elections, reinforcing human rights and supporting transparent, accountable governance.

To empower our youth, we have invested strongly in education. The recent UNDP report ranked Jordan first in educational reforms in the Arab world.

In the economy, we are boosting growth by supporting innovation and enterprise. And our efforts are paying off. External debt has fallen; exports are up; the first half of this year saw real growth of 7.2 per cent.

Our first goal is to meet our people's expectations and needs. But we hope our path will also inspire others: This is what a home-grown Arab-Islamic model can accomplish. This is how we will achieve the peace and prosperity that the Arab people so urgently need and deserve.

Certainly, challenges lie ahead. But we are committed to the path. And let me say, we are encouraged by your country's example. Russia's courage is inspiring, and so is your success.

We who believe in the future of the Middle East are grateful to our Russian friends for their support. Your country's balanced approach to the region; its significant role in the Quartet peace process; its experience and support of reform: all these are contributing to positive change.

Jordan deeply values its own special ties with Russia. And I hope we will have an even closer partnership in the years ahead. There are exciting new possibilities for trade, tourism and other exchanges. Indeed, Jordan is a gateway to our entire region, especially the critical effort to rebuild Iraq. To the Russian business community; to your academy and experts; to your leaders, I say: Come to Jordan; work with us; be with us, as we help create tomorrow's Middle East.

My friends,

For our two countries and our world, great opportunities lie ahead. A century when every person participates in global prosperity and growth. When young people are not threatened by terror and hatred, but have every opportunity to fulfil their potential. When families can live in peace. Together, I believe our partnership will succeed. Our world deserves no less.

Thank you very much.

Remarks by His Majesty King Abdullah II  
At Georgetown University  
US Washington, DC  
21 March 2005  
President DeGioia,  
Members of the Board,  
Distinguished Faculty and Guests:

Thank you. I am honoured to receive this degree; doubly honoured, to receive it from a university that I attended and respect so greatly.

Georgetown University is an enduring testament to the good that comes when the doors of scholarship are open to a global community. By welcoming students from around the world, you have helped create a truly international dialogue. I am proud to be counted among you.

I came to Georgetown for graduate studies in 1987. Just 18 years ago – and a world away. In 1987, the Berlin Wall was standing. The Dow Jones Average made headline news by topping 2000. There was no World Wide Web. No dot-coms and no dot-com crash. Global trade was a fraction of what it is today. And nearly half the population of today's Arab world had not yet been born.

Historic changes and challenges. Breakthroughs in human knowledge and opportunity. And yet, for vast numbers across the globe, the daily realities have not altered. Their world is one of poverty, unemployment, hardship and relentless conflict.

When I talk to people in need, they tell me they want to hope; they are eager for opportunity; they are ready for better days. And I can tell you that every time their hopes are disappointed, all nations lose. Because earth's dispossessed are vulnerable targets for extremists: those who teach that global justice is meaningless, that satisfaction can come only in violence, division and intellectual isolation.

My friends,



Ours is a moment of great potential for my region and the world. It can be an era of openness, cooperation and advancement – a time for ending old divisions and expanding prosperity. But we will not achieve that potential until we reach the voiceless majority. It is time to give them new reasons to hope and meaningful ways to participate – economically, politically and in shaping our global culture. Most important, people need confidence that opportunity is available to all.

This is the challenge of 21st century development and reform. Clearly, it is not a challenge for the Middle East alone. But for those of us in the Arab world, who believe in the future, who believe in our people – it is a challenge we accept.

More than five years ago, Jordan committed to a reform strategy that would accelerate the pace of change. We have taken specific steps to support pluralism, strengthen private-sector-led growth and create a renewed social contract. In our view, successful reform is not an event. It is a sustainable process that will build on its own successes – a virtuous cycle of change.

That means educational programs that equip young people to succeed in a modern economy. It means human-rights initiatives that empower women and youth to participate fully in the life of the nation. It means disengaging government from state media to support the growth of a responsible, independent press. It means good governance to facilitate private-sector job creation and national economic growth – indeed, last year, Jordanian GDP grew 7.5 percent.

Real change only happens when citizens throughout society understand and commit to reform. This is one reason effective reform must be home-grown. It is also why, in Jordan's model, participation is important at every level. In addition to our yelected national Parliament, we are establishing development regions across the country, each with a directly elected local council. Such decentralisation will give the grassroots a more direct say in their own development.

Most recently, I tasked a high-level committee to set a national agenda to guide the country in all areas – political, economic and social. The committee brings together leaders from government, the media, civil society, political parties and the private sector.

We believe that Jordan's reform model is relevant to the entire Middle East. It responds to the challenges and opportunities of the modern world. It takes inspiration and power from our society's deepest Arab-Islamic values: respect for human dignity, global good citizenship, tolerance and peace. And we have spoken out very clearly about these values, in our worldwide Amman Message about the true Islam.

As President Bush recognises, reform will take a different course in each country in the Middle East. In my meeting with the President last week, we had very good discussions about the progress that is being made. The Arab world is writing a new future; the pen is in our own hands. But we need and welcome the support of friends throughout the world.

Nowhere is that support more important than on the issue of Arab-Israeli peace. This conflict has caused major instability in our region. You can't build solid reforms where violent shockwaves are constantly churning. Make no mistake about it: today, the enemies of a just peace are enemies of Arab progress. For sake of the parties, the region, and the world, the time has come to heal the land.

Today, we have an unprecedented opportunity to move the process forward. The parties have agreed to the Roadmap. The international community is on board through the Quartet and the G-8. In London earlier this month, leading nations committed to helping the Palestinians create the security and economic opportunity that progress requires.

Next is the hard work to make real history. For that, the friends of peace need our constant and active support. Let's help them stay focused on the promise of lasting peace. It is a positive vision put forward by Arab nations in Beirut three years ago – and one to which we remain committed. A sovereign, viable Palestinian state – one that gives its people the dignity of freedom and provides a future of hope. Security guarantees for Israel, based on regional acceptance and peace, from sea to sea – from Morocco's Atlantic coast to the United Arab Emirates' Gulf waters. And a process that can bring regional reconciliation – one that leads to a comprehensive settlement that addresses the Syrian and Lebanese tracks.

Other critical issues, too, need our united support. In Iraq, the difficult work of reconstruction continues. Iraqis need our help as they build security, establish effective and inclusive institutions, and rebuild their historic country. In Lebanon, the international community must support a peaceful, democratic future. Globally, we must work together against terror and to bridge economic and cultural divides.

Education is key. More than ever, people and nations need knowledge – of our common bonds, of history's shifts, of humanity's mistakes and successes. Georgetown University can take pride in its important role. I was privileged to be here in 1999 for the dedication of the Centre for Contemporary Arab Studies. It is only one of the many ways that this university contributes to cooperation and understanding. Let us never silence that dialogue. In the days and years ahead, I urge you to keep your doors open to the young people of my region.

My friends, our nations and futures are inseparably linked. Creative thinkers throughout our societies have the power to transform lives around the globe. It is up to us to open minds and lives to the promise that our century offers. Together – in the classroom, in the workplace and in the halls of government – we can make the promise real.

Thank you very much.

Remarks by His Majesty King Abdullah II

At the Opening Session of The Petra Conference of Nobel Laureates

JordanPetra

18 May 2005

Elie,

Distinguished Friends,

Thank you very much. It is a pleasure and an honour to welcome all of you to Jordan.

In the ninth century, a remarkable institution opened its doors in the Arab world: the Bayt Al Hikma, the House of Wisdom. It was the global think-tank and data bank of its era. And it helped create an astounding community of seekers, seekers for truth, seekers of progress. They reached out to the whole world for knowledge. They pioneered new ideas – in medicine, science, human development and more. Historians tell us their work helped advance the human condition for centuries after.

My friends,

This morning I look around this room and I see a House of Wisdom – a global House of Wisdom for the 21st century and beyond.

And I thank you for coming together, and coming here, at this critical time. A process begins here – a process that all of you will shape – and by your effort, help shape our world.

Surely, it has never been more important to reach out, to seek new understanding, to work together for a new and better reality. And no one can contribute more than you, who have refused to accept limits on human possibilities – who have pioneered new paths to the future.

Today, humanity is at a critical crossroad. Ours can be an open world of expanded horizons and new opportunities. Or it can be a closed world of endemic crises and lost chances.

The direction we go is especially critical for one important part of the global population: our youth. In the Middle East, more than half the population is 18 or younger. They have no memory of a time without regional conflict. They see a huge global gap between rich and poor. They see diseases that wealthy nations have wiped out, that are still crippling people in the developing world. They see gender inequality holding back the talents of half the world. They see the harm as well as the hope brought by globalisation.

My friends, these young people are tomorrow's citizens, tomorrow's teachers, tomorrow's Nobel Laureates. They won't accept empty words and promises. They want to make a difference. To share in the fruits of modern knowledge. To help create a positive and generous future – a future in which they, and all people, live in freedom and respect.

It is up to us to give them the tools they need. And we must make a beginning now – a taste of success that helps people see they can succeed: to create more freedom and opportunity, so

people can fulfil their potential. To build peace, so people can move forward with confidence. To expand global cooperation, so that, working together, we can achieve the promise of this age.

Those who work for change don't face these tasks alone. We are joined by forward-looking people everywhere.

In my region, there's been a wave of reform aimed at democracy and development. These steps are vital to meet the expectations of our people, especially our young people, for freedom and opportunity.

The friends of Middle East peace are also actively working. And today, they have an unprecedented opportunity to succeed. The basic goals are shared by people on both sides: justice for the Palestinians. Security for the Israelis. Two states living side by side based on international legality. The challenge now is to help people to hold that vision – to believe in a future of peace despite the forces of violence.

Around the world, people are also struggling to confront hatred and division. The vast majority, East and West, North and South, reject the cause and call of extremism. They know it is profoundly anti-peace, anti-progress and anti-democratic. But we need to do more, on all sides, to reinforce the basic values of humanity.

Last November, Jordan released the Amman Message. It restates the core values of Islam: peace, tolerance and the essential unity of the human race. Islam calls on believers to reach out to others with respect and to be involved in the progress of the modern world. The Amman Message has been read and welcomed by Muslims on every continent.

My friends,

The power of ideas is one of humanity's greatest sources of energy. And it is the power that lies behind the Petra Conference. Each one of you can advance this world by doing more of what you already do so well: think out of the box. We need you to help shift perceptions, develop solutions, recommend specific actions and make change happen. We need you to speak to our young people, to encourage them to achieve the greatness I know they possess. We need you to help forge a new process for global peace and security.

Can you make a difference? The Quran tells us, explicitly, that if a person saves one life, it is as if he saves all people. Such humanity is in the deepest spirit of all the People of the Book. Indeed, it's part of all great world teachings.

So I believe, that if the work you do here saves even one, it will be that beginning we seek – a beginning of peace, of progress, of human unity – a global House of Wisdom to which all can belong.

Thank you very much.

Remarks by His Majesty King Abdullah II

At the Euro-Mediterranean Summit

Spain/Barcelona

28 November 2005

In the Name of God, the Most Merciful, the Compassionate,

Your Excellencies,

Commissioner Ferrero-Waldner,

My friends,

I speak to you tonight on behalf of millions of Jordanians, who seek global peace in defiance of terror and hatred.

The bombings in Amman this month are evidence – once again – of our urgent need to work together in global defence of our peoples and our future. In Amman, as in Sharm El Sheikh, Casablanca, Riyadh, Istanbul, Madrid, London and elsewhere, extremists showed their contempt for humanity. Theirs is a profoundly anti-Islamic agenda. Only by distorting and abandoning the true teachings of Islam, can anyone kill innocent civilians. The Quran says (2:208): O you who believe, enter into peace entirely.... And it admonishes (5:87): Do not transgress; truly God does not love the transgressors.

My friends, the Arab world will not be set back. We will not close the doors on opportunity for our youth. We will not shut off dialogue and cooperation with our friends around the world. We will help lead this century – a century that, with our help, can bring peace, freedom and prosperity to billions of people.

Our relationship with Europe is key to that future. Ten years ago, the first Euro-Med Summit recognised the shared destiny of our regions. It acknowledged, frankly, that lasting security and prosperity cannot be achieved by our nations in isolation. It agreed that we must address the economic gaps between our regions. We must work together for peace. And it established the three-basket framework for partnership and progress.

Today the Euro-Med Partnership is more important than ever. Its success will deliver the opportunities that our young people need, create the stability for freedom to thrive and provide a global model of mutual respect among nations. This makes cooperation and dialogue more than just ideals – they are critical strategies for a future of peace and well-being.

It is because extremists understand the power of our cooperation that they are working so hard to divide the world into hostile camps. We must defeat their strategy. That requires

action on all fronts: effective security cooperation, yes – but also economic, legal, social, and political outreach.

The Euro-Med partnership recognises this comprehensive approach. Jordan was proud to be the first Mashreq country to sign a partnership agreement. We were among the first to participate in the European Neighbourhood Policy. And we have made significant progress on a joint action plan. Last year, Jordan joined Egypt, Tunisia and Morocco in signing the Aghadir Agreement – a step toward closer regional cooperation, another goal of the Barcelona Process.

Jordan's active participation in these efforts and others, reflects our larger national vision. We seek sustainable development and reform: not short-term, narrow-impact measures, but deep, lasting change that benefits all citizens. To advance this process, we brought together stakeholders from across society to form Jordan's National Agenda Committee. The energy and support of civil society and the private sector are critical, and we have involved them every step of the way.

And let me say, the strength and will of Jordanian society was amply demonstrated in the national response to the mass murders in Amman. People from all walks of life marched in solidarity against the extremist threat to our country. And they did more: they got back to their work and their lives, to demonstrate their fearless belief in our country's future.

The National Agenda institutionalises reform by articulating our priorities for the next 10 years. Its requirements meet and exceed the goals of joint plan with the EU. Our goals are clear: effective, inclusive political institutions, a growing, opportunity-rich economy, and an expanded future for all citizens. We have put special emphasis on human rights, the empowerment of women and education and opportunity for our youth.

The National Committee's report was officially presented to me last week. Implementation has already begun. Jordan is absolutely committed to moving forward. And we are deeply grateful to our European partners for their support.

My friends,

The European-Mediterranean partnership holds promise for all of our countries. But it has not yet delivered on its greatest hope: peace, stability and prosperity across our whole neighbourhood. Key to our future is a new dialogue of cultures – a dialogue that can strengthen our common bonds and bring us together. All of us have a responsibility to promote the inter-cultural, inter-faith respect that such dialogue depends on.

Jordan is working with the international Muslim community to oppose extremist violence and false teachings. A year ago, we issued the Amman Message – a call to peaceful coexistence and progress. It supports tolerance and respect for others and the pursuit of peace. We have

followed this up with concrete measures to affirm Islam's central, moderate core. And we are working with our European friends to increase understanding and good-will.

Together, we must also end the sources of misunderstanding, division and frustration. My friends, we must bring peace to the Middle East.

In peacemaking – just as in reform – Jordan has consistently urged a measurable process with milestones along the way and a clear end-game. For Palestinians, for Israelis: a lasting, just solution; two states, living beside each other in peace and security, a sovereign, viable Palestinian state, security for Israel, and a comprehensive settlement that can bring regional reconciliation. For Iraqis, reconstruction and hope: a stable, unified Iraq, with a rebuilt economy and an inclusive civil society. We urgently need to move forward. Violence and instability in the region are threats to security and prosperity for all our peoples. Working together, I believe we can help usher in a new and more positive era.

In this effort, Europe plays a central role. We are grateful for your leadership in the Quartet process. The Euro-Med process itself contributes by helping countries work in practical ways toward shared goals. Together, let us continue to keep up the pressure for peace and progress.

My friends,

There are deep and historic ties between our peoples. My region is the birthplace of our common history. For millennia, goods and ideas have crossed the sea between us. The truth is that there is far more to tie us than to divide us. Together, we can expand and strengthen that middle ground.

In Arabic, the Mediterranean is named Al Bahr Al Abyad Al Mutwasset – the White Middle Sea. The name evokes the white-capped waves of this great waterway and its central position in our peoples' history. In European languages, too, the Med has long been named for its role at the middle of the region's life.

Today, the Mediterranean, the Middle Sea, stands again at the centre: a middle ground for both Europe and its southern partners, to come together and move forward. Let us meet at that middle, to make today's promises real, for all our people. To create the peace and prosperity our citizens need. And together, in partnership, to bring justice, understanding and a new era of hope.

Thank you very much.

Remarks by His Majesty King Abdullah II  
Upon Receiving the Golden Medal of Athens Award  
GreeceAthens  
21 December 2005

In the Name of God, the Most Merciful, the Compassionate,

Thank you, and thank you all. I am honoured to receive the Golden Medal of Athens. To me, it is a symbol of all that your historic city has given our world – the ideals of good governance, the growth of knowledge, partnership with others, and of the whole immeasurable legacy that Greece has given – and continues to give – to the world.

So it is with great pride that I accept this honour on behalf of all Jordanians. By doing so together we also celebrate the special friendship and unique historical bonds between the people of Greece and Jordan. And the agreements we sign today will, I hope, bring us even closer in the years ahead.

My friends,

For more than six thousand years, the ideas, knowledge and values of our two regions and peoples have shaped the entire world, and continue to do so in almost every way. My home, the Levant, gave the world, among other things, High Civilisation, literacy, law, agriculture, medicine, astronomy, mathematics, and the three monotheistic religions: Judaism, Christianity and Islam - to which the majority of people in the world belong today. Greece gave the world, among other things, philosophy, classical culture, drama, the empirical sciences – including empirical medicine – geometry, democracy, and the ideal of individual freedom. Thus, most of humanity's knowledge, culture, heritage, and even faith come from us together, the Levant and Greece.

Today, our two countries may seem small, but we continue to be the guardians of the best of the world's heritage. One way we do this, together, is by protecting the Greek Orthodox Patriarchate of Jerusalem, the oldest church in the world, and the Church of the Holy Land. Another way is by maintaining a respectful dialogue between Christianity and Islam, the two largest religions in the world.

Both Islam and Christianity teach belief in and devotion to, One God, and love for our fellow human beings. Jesus – peace be upon him – commanded us to love the Lord your God, and to love your neighbour. So too, the Prophet Muhammad – peace and blessings be upon him – said: By Him in whose Hand is my life, none of you believes until he [or she] loves for their neighbour, what they love for themselves.

These teachings are at the heart of Jordan's commitment to peace, tolerance and justice. They are also at the heart of Jordan's traditional Islamic reaffirmation. Reaffirming traditional Islam consolidates the middle ground of our religion, to which more than 1.2 billion people belong. And it strikes at the very roots of extremism, by exposing the falsity of extremist ideologies and by rejecting extremist hatred and violence as profound distortions of Islam.

Our initiative was demonstrated last month, after the Amman bombings, when Jordanians from all walks of life marched together to defy terror and assert Islam's true values. But it



started much earlier. Just over a year ago, when we released the Amman Message – an explanation of the true nature of Islam and a call to peaceful coexistence among all nations. Then, last July, a conference in Amman brought together over 180 Muslim scholars from 45 countries. They represented all eight traditional schools of Islamic Jurisprudence from the three main branches of Islam – Sunni, Shi'i and Ibadhi. The conference was supported by 20 fatwas from the world's leading Islamic authorities.

The scholars signed a joint statement of accord that affirms the validity of all eight schools of jurisprudence and of traditional Islamic creeds and practices. It condemned takfir, a practice of labelling others as unbelievers, in order to justify wanton acts of violence upon them. Last, it specified the conditions for issuing legitimate fatwas, thereby demonstrating that extremist fatwas justifying violence are in clear violation of Islam's teachings. Two weeks ago, at Jordan's initiative, the three components of this declaration were unanimously endorsed by the International Organisation of the Islamic Conference.

My friends,

The Islamic reaffirmation is a Muslim initiative. But moderation and respect for others is not a path for Muslims alone. We must all work for understanding, tolerance and dialogue. This is the message of our Euro-Med partnership, where Greece has played such an important role. And it is our common responsibility as the historical shapers of our world.

The Greek people have another central role to play, in helping to build bridges between peoples and regions and in supporting peace: a lasting, just solution to the Arab-Israeli conflict, with two states, a sovereign, viable Palestine and a secure Israel; a stable, unified Iraq with a rebuilt economy and an inclusive civil society.

The Greek people can also support and encourage regional reforms that advance development and stability and provide the opportunities that our young people urgently need. Jordan is leading the way in the Middle East with a comprehensive program of political, economic and social reforms. Public and private sector leaders were directly involved in developing our new National Agenda, aimed at guiding government actions over the next 10 years. We are getting results and we are staying the course. I invite you to come to Amman and experience both the modern Jordan and its ancient heritage, including that of its Hellenistic period.

Allow me also, at this special time, to wish all of you a happy Christmas holiday.

Thank you very much.

Remarks by His Majesty King Abdullah II  
At the University of Mississippi  
USOxford, Mississippi

03 February 2006

In the Name of God, the Most Merciful, the Compassionate,

Senator Lott,  
Chancellor Khayat,  
My friends,

I am really truly delighted to join you today. Chancellor, I know that this University has opened its doors to students from every continent. Nine Jordanians are currently students here, and many more through the years. Ole Miss is helping shape a global community of knowledge. That's a critical contribution to the future.

It is a special privilege to be part of this lecture series and thank you very much. I know the Lott Institute is dedicated to leadership for the public good. But let me say, your interest in global affairs is, itself, leadership. Today, no one who cares about security and opportunity at home, can ignore the wider world. There has never been a more important time to be aware of international events; to advance our understanding; and to work together to defend our future.

You know, the whole world saw the devastation that Katrina caused here in Mississippi and the Gulf Coast. That's the reality of the media age. But there is another reality, the reality of the global age - not just economic networks and international diplomacy, but a new sense of human connection. People everywhere responded with shock and concern to the destruction and suffering here, just as we all joined together to help Asia after the tsunami, and Southeast Asia after its devastating earthquake.

Last November, when extremists set off bombs in Amman; when they created a bloodbath at a wedding party; when they murdered innocents - people around the world drew together in outrage and concern. And when Jordanians defied the terrorists; when thousands of our citizens marched in solidarity, Muslim and Christian, arm in arm, saying no to terror; when our country's path of progress did not stop - people everywhere supported us. On behalf of all Jordanians, may I say, thank you all.

The bombings in Amman are evidence of the common threat we face. In the few years since this century began, extremists have hit New York, Madrid, London, Riyadh, Sharm El Sheikh, Istanbul, Casablanca, Bali and more. Their aims are clear. They seek to undermine public confidence in open society as well as the rule of law. They feed on discontent, frustration and ignorance. And they are working hard to create chaos and division so they can pursue their goals.

Defence requires more than security measures. We must deflect the extremist efforts to drive us off the path forward. That means keeping our focus on our own priorities. For Jordan, these are very similar to yours: creating more opportunity; growing a job-rich economy so our young people can build a future; creating safe communities for our families and children;

Creating and sustaining good government, to protect human rights and give citizens a stake in a peaceful civil society.

These concerns are at the heart of Jordan's national strategy. In recent years we have accelerated reforms across the board to meet our country's needs. The goal is tangible, genuine progress - economic, social, and political.

In Jordan stakeholders from across society have created a reform program that is home-grown; a program that - first and foremost - serves our people. We know that any delay in reform only delays its benefits. That makes the cause more urgent and our determination stronger. Indeed, Jordan has already been recognised for its success in education reform and economic growth. But unfortunately there will always be resistance to change. At times, reform has hit heavy weather. Those who like the status quo find excuses to reject reform; often, they will claim it is being imposed from outside. But Jordan's message is: reform is ours, and our future will not be stopped.

Nor will we be deterred by security threats. Last fall, a new government came into office with a twin mandate: to move our reform program forward while ensuring the safety of our people. As Americans know, public safety is not only an obligation of government, it is also the cornerstone of free and open society. The fact is our countries have a double task, to protect our security and our values. It is a challenge that we can and will meet.

My friends,

It is impossible to talk about a better future for my country or the region without addressing today's serious conflicts. As long as they continue, the region's focus will be on the past, not the future; on division and stagnation, not growth.

The Palestinian elections last week were an important step in the history of the Palestinian people. We have to respect their choice. For years, the Palestinian people have expressed their desire for peace, and their respect for the legitimacy of international resolutions. Both peoples, Palestinian and Israeli, are fed up with violence. They want and deserve a future of hope. So it is now vital for the parties to return rapidly to the negotiation table - and equally vital for the international community to continue their support.

Establishing a viable, sovereign Palestinian state, alongside a secure Israel, is the only way to put an end to violence and extremism. This two-state solution was presented in the Arab peace proposal in 2002, and is supported by the international community, and forms the basis of the Roadmap peace process. The next two years are critical. Peace needs our full efforts.

In Iraq, there is a huge responsibility also on the international community to support the Iraqi people as they rebuild their country and restore stability and security. The entire world has a stake in a unified, stable, and prosperous Iraq. Indeed, in the December elections, millions of voters ignored insurgent threats and cast their ballots. We hope a coalition government will be formed, moving the country toward a more inclusive polity. As progress continues, as

Iraqi security forces are strengthened, it is vital to maintain the security and stability needed for success.

Another critical arena for peace is the global struggle for tolerance and dialogue. There has been much talk in recent years about a clash of civilisations. The reality is there are powerful bonds among Islam, Christianity, and Judaism. The Prophet Mohammad, peace and blessings be upon him, said: "By Him in whose Hand is my life, none of you believes until he [or she] loves for their neighbour, what they love for themselves." The Torah reads: "Love therefore the stranger: for you were strangers in the land of Egypt." Jesus - peace be upon him - commanded: "love the Lord your God," and "love your neighbour as yourself."

My religion, Islam, is why traditional Muslims decisively reject extremist violence and hatred. The Quran says: "O you who believe, enter into peace entirely," and it admonishes: "Do not transgress; truly God does not love the transgressors."

To oppose false teachings, Jordan released what we call the Amman Message more than a year ago. It is an explanation of the true nature of Islam and a call to peaceful coexistence among all human beings. In July, an international gathering of Muslim scholars carried the Amman Message forward, with a declaration that invalidates extremist fatwas that violate Islamic precepts and justify violence. These key points have been endorsed by the worldwide Organisation of the Islamic Conference.

Zero tolerance toward those who promote extremism. This is the view and the voice of traditional Muslims around the world. We will not allow extremists to close the doors to the future for our youth. We will not let them block our path to global peace and progress.

The Amman Message is an all-Islamic initiative, but the road to moderation is not for Muslims alone. All of us have a responsibility to promote the intercultural, interfaith understanding that our future depends on. Across the world, I have met and talked with Christians, Jews, and others to try to energise a new dialogue of respect and trust.

Meeting today's challenges will take all of us, working together. Success will require our energy, our intellect, and most of all, our will. Here at the University of Mississippi, you showed what people can do, together, to overcome the mistakes and divisions of the past and move forward to a new era, a promising era for all.

I am encouraged by the words of Mississippi's own William Faulkner, when he received the Nobel Prize. He believed that in an age of danger, humanity would prevail - not because of technology, not because of power, but because of the "old universal truths" of the human soul: compassion, sacrifice and endurance. He called these traits the glory of our past. God willing, with all of you they will be the glory of our future as well.

Thank you very much.

Remarks by His Majesty King Abdullah II

At the European-American Press Club

FranceParis

20 March 2006

In the Name of God, the Most Merciful, the Compassionate,

Christian,

Members of the Press,

Thank you very much. I'm delighted to see so many familiar faces. It is a pleasure to be in France once again. My father King Hussein had a special place in his heart for this great country. And I deeply appreciate the warm welcome you have always given me and my family. I'm honoured to have this opportunity to speak here today.

My friends,

This is, quite frankly, a moment of tremendous global unease. The disquiet that many of us feel was captured in a recent headline proclaiming the "end of tolerance." It was prompted, of course, by the controversy over cartoons denigrating the Prophet Mohammad, peace be upon him.

Much has been said about the cartoon crisis and how it grew. Let me simply say that Muslims around the world - and I am one of them - condemned the denigration of the Prophet. The majority of Muslims also condemn the violence that ensued as alien to the principles of Islam. And I know that many in the West also spoke out, rejecting the vilification of Islam.

The cartoon controversy has exposed the fault lines in our global society. Not so long ago, we saw our world as one of dynamic interconnections and multi-cultural tolerance. But today - even as our cultures and economies interact more than ever before - the talk is of a clash of civilisations. Because, as the age of globalisation has grown, it has not grown in the most significant way; it has not moved beyond tolerance, to creating cultures of respect, rooted in understanding.

There is no clash of civilisations. But we have received a grave warning. And we know, too, that there are those among us who seek to deepen the fault lines. They would capitalise on our lack of understanding about each other, to set off an earthquake of anger, resentment, and fear. This applies not only between East and West, but within eastern and western cultures.

We should not mistake what a clash of civilisations would mean in practical terms. A breakdown in the ties of trade and investment that are vital for economic growth and job opportunity. Barriers to solutions to cross-border problems - health, environment, poverty and more; the erosion of joint security cooperation, which has played such a key role in

containing and ending regional conflicts; serious obstacles in the path of international development; a halt to the cultural exchange that enriches life everywhere.

In Jordan, our French friends have long been part of the landscape - at the French Cultural Centre, the Terra Sancta School, L'ecole des Freres, and more. Our scholars work together - in Jordan, in France, and in internet space. French investors have channelled 800 million Euros into key Jordanian enterprises, employing thousands of people. Here in France, thousands work in industries that export goods to Jordan. Across the globe, our peacekeeping forces work side-by-side meeting crises like that in Kosovo. At the diplomatic tables, our countries cooperate on shared goals.

Let me say it plainly: the Middle East needs Europe and Europe needs the Middle East. But the peaceful, integrated global society that we all need is not going to materialise by itself. It needs our active, conscious efforts - to move from cultures of tolerance to cultures of respect; to create true appreciation for each other's beliefs, concerns and goals; to develop a new understanding - recognising our differences, yes, but also the powerful values that bind us.

Bridging the respect gap is going to take a commitment from all of us. In November 2004, we in Jordan released the Amman Message. It is an explanation of the true nature of Islam and a call to peaceful coexistence among all human beings. I believe this initiative provides a program for moving forward: to speak boldly against hatred and ignorance, to work together for the common good, and to avert a clash that will harm us all.

Political and religious leadership has a crucial role. Within the worldwide Muslim community, numerous leaders, at every level of society, have raised their voices to restate Islam's commitment to respect for others. Last July, a gathering of some of the most learned Islamic scholars in the world met to carry the Amman Message forward. Their declaration strikes at the roots of extremism by denying its Islamic legitimacy. Last December, the international Organisation of the Islamic Conference endorsed the principles and recommendations enshrined in the scholars' declaration.

Our regions should also be drawing on our bilateral and multilateral ties - to strengthen understanding of our shared future and to enhance effective cooperation. International institutional frameworks can play a central role in identifying strategies and means. The Barcelona Process clearly identifies cultural cooperation as one of the three basic elements of security and progress. And the Euro-Med Partnership can carry that forward. We need to strengthen such initiatives and expand their reach.

In building respect, an active dialogue among peoples is also important. Our world learned this truth in the healing of racial divisions; we learned it in peace-building among nations; it is central to interfaith harmony as well. My friends, allow me to say that you in the media also play a critical role. As observers and communicators, you are the conduit through which cultures and societies are exposed to each other. Your work puts you in a privileged position to learn - first hand and in depth - about societies, religions, traditions, and values. You

contribute directly to global understanding - by avoiding and correcting distortions, by refusing to incite hatred, by offering reasoned criticism and analysis and by portraying the full dimensions of people's lives: their concerns; their triumphs; their insecurities; their hopes. These steps and others are vital as we confront the challenges of our time - to achieve this new century's potential and lift the billions who are still oppressed by poverty and conflict. The entire world has a stake in a stable, forward-looking Iraq. Last month's heinous attacks on sacred places were clearly intended to fan sectarian strife. I have repeatedly urged Iraqis to stand together and stand firm against such provocation. To advance that cause, Jordan has called for a conference in Amman to bring together Iraqi religious leaders to find a way to preserve Iraq's unity and to restore, as soon as possible, its security and stability. The Palestinian-Israeli peace process is also at a critical point. Only a lasting peace will enable people on both sides to build the positive future they need. And the only guarantee for peace is the two-state solution: a viable, sovereign Palestinian state, living alongside a secure Israel. Between today's realities and that positive future, there is an urgent need to build some new bridges. The foundation of peace is, can only be, respect.

My friends,

Progress in peace - whether in the Middle East, Central Asia, Europe or Africa - requires us to resist those who would divide us. So let us make the end of tolerance a beginning - the first step on a new path that leads beyond tolerance, towards the kind of real understanding that heightens our respect for each other.

Diversity is part of the human condition. In the Quran, it is written: God Almighty said: "Mankind! We created you from a pair of a male and female, and made you into nations and tribes that ye may know each other."

It is up to us, here and now, to know each other; and build the bonds. God willing, we can do so, and move forward.

Thank you very much.

Remarks by His Majesty King Abdullah II  
On the Occasion of Deerfield Academy Commencement  
USDeerfield, Massachusetts  
28 May 2006  
In the Name of God, the Most Merciful, the Compassionate,

Headmaster,  
Friends,

It is a tremendous pleasure to be back at Deerfield among all of you. And students, I'm honoured to help celebrate your Commencement. In life, this is one of the rare moments - not so much a turning point, but a pausing point when you can stop, look back at real success, and think about the path ahead.

Allow me, first, to congratulate some who have really been looking forward to this day, from that first Deerfield visit, through all the lessons learned, term time and vacation time, papers and reports and college applications, the worries and the joys, the late-night emails, the love and support and all those phone calls. Deerfield parents, please accept our respect and thanks.

Men and Women of the Class of 2006,

This is your day. And I am here to welcome you to a remarkable community; the community of Deerfield alumni. You will find us around the world. And each and every one of us knows what it means to look up to the hills and be part of this experience and school.

You learn when you come here, that a great institution is not just a place. It is the people who give this school its continuity and character; its unique spirit of community and excellence. For you, as for all of us, that experience does not end today. It simply begins a new phase. The Deerfield ethos is for a lifetime. And as you carry that spirit forward, you will shape the future more than you know.

Your class comes of age in a world of change - in global economics and politics, in human knowledge and capability. That's a reality my own class is very familiar with. In 1980, when we graduated, the Cold War was in the daily headlines; now, it's a chapter in the history books. Technologies that were cutting edge just a short time ago, are, today, in museums. You know, the first IBM PC wasn't even on the market until 1981. It held 256 kilobytes of memory. Kilobytes. All the technologies we take for granted today - cell phones, laptops, global communications - were barely on the horizon. And I can guarantee you, in a few years, you and I will be working with whole new capabilities and facing new challenges.

How do we prepare for that kind of future? In Jordan, in America, in every other country, it starts with a command of the basics - a foundation of knowledge and skills. There's an old saying in my part of the world that knowledge is the best kind of wealth: it's easy to carry; nobody can take it away from you; and it has value wherever you go. And let me add, contrary to what it felt like, when you were studying for exams your brain cannot over fill. The more we know, the better we can understand what's coming in business and technology; in the environment; in global affairs and world civilisations. The message is, keep learning.

But in a dynamic, diverse world, success requires more. To thrive throughout your life, you must be prepared to think your way through change and growth and challenge. The best schools foster critical thinking and a restless curiosity. And strong ethics - respect for other people and other viewpoints; honesty; responsibility; compassion. At Deerfield, we've all



heard it said: “keep it on a high level” - and “finish up strong.” That sense of character, that heart, is what you bring to the future. And it has never been more important.

That's because, for all that has changed, some things haven't changed enough. Vast numbers of people across our globe still suffer poverty, hardship, and relentless conflict. In my own region, too many lives, for too many years, have been shattered by violence and hopelessness. I can't stand here today without thinking about students in Iraq, Palestine, and Israel whose futures have been derailed by years of conflict.

My friends,

No person, no nation, can ignore the hopes of others around the world. We are tied by an inseparable kinship and shared dreams. Your fellow students everywhere want what you want - justice and safety and opportunity to build lives of prosperity and peace. And as long as these hopes are unanswered, our whole world pays a terrible price.

But, friends, we have choices. We can turn away from “us and them” thinking and all the barriers and stagnation this will bring. We can work together to build the peace people need to live in security and confidence. We can expand opportunity and win-win development. And we can open a new dialogue between faiths and cultures, in genuine acceptance and respect.

The job for tomorrow's leaders is to find the opportunities that lie within the challenges. And each and every one of you will play a vital role. More than ever, people need to understand each other - our common bonds and interests, as well as our different histories and, sometimes, views. Deerfield Academy has made a huge contribution, especially in reaching out to the Arab world. And now there will be a new opportunity to work together, as King's Academy opens its campus in Jordan. We wanted to bring the Deerfield model to the Middle East - a co-ed boarding school where faculty and students are close, academic studies encourage great work, and life is enriched with competitive sports, lively arts, and real community service.

We are deeply grateful for the support and encouragement of so many people in the Deerfield family, especially the great Class of 1980. And we look forward to a continuing special relationship between the schools. Indeed, when King's first term starts, we have just the right headmaster to welcome the students - a superb educator and great leader, Eric Widmer.

I guess Eric isn't the retiring type - and let me say, we are heartily thankful. Sir, we look forward to welcoming you and Meera to Jordan. And I hope that every one of you will pay us a visit as well.

And let me say a word to faculty and staff. Deerfield graduates are the living legacies of people who inspired us, and believed in us, and were there for us. I was in one of the first Deerfield classes taught by a great young teacher named Tedwin Littman. He went on to

encourage and motivate decades of students. His loss this year cannot take this legacy away. Our prayers are with his family and friends.

Ask any Deerfield grad, and you will hear about the teachers who made a difference in our lives. And by the way, not every great teacher was in the classroom. We have all received a few life-lessons from people like Norm and Dottie in the Stock Room. To every one of you, thank you for all you give.

Here in Deerfield, and at King's Academy too, the spirit of community and achievement will continue. But in just as real a way, the spirit continues in every graduate who reaches out to make a connection and make a difference in our world.

In a sense, that's the idea behind the Green Key tradition - a hand of friendship, student to student, and the chance to mentor others in your turn. Now you graduates will be Green Keys in a larger world. Each, in your own way, will choose what doors you open. And each of you will choose whether you hold those doors open for others as well as yourselves. Carry the Deerfield spirit forward. Choose great things. And believe in your power to make a difference. The century is yours.

Congratulations and may God bless you all.

Remarks by His Majesty King Abdullah II

At the Arab and American Action Forum

USNew York

19 September 2006

In the Name of God, the Most Merciful, the Compassionate,

Thank you Saeed. And thank you all for your warm welcome. I am tremendously pleased to be here. Young Arab Leaders are making a major impact throughout and beyond our region. Your work and leadership have helped shape a new action ethic: forward-looking, determined to develop our strengths and participating fully in global progress. Your achievements are reason for great pride and great hope.

We also welcome the partnership of our many American friends, especially those of you who are here today. The CGI has made possible important new relationships, and it is nurturing the leadership - on both sides of the Atlantic - that can carry us forward. May I say a special word of appreciation to the Young Arab Leaders organisation, under the able direction of Saeed, who has led the way to a new face of business leadership, one that is both, globally aware and globally responsible.

This Forum takes place at a critical time. Recent crises have demonstrated a worrying disconnect between peoples and regions. I hear young Arab men and women ask if America is listening to them. Such divisions are bad news for all of us. Because in this century, prosperity and peace cannot be achieved in isolation, or gained by force; they are the products of two conditions only: global cooperation and mutual respect.

In the Middle East, that means getting the message out that regional and global peace is the only way to achieve the better life that people want and deserve. Outside the region, the message needs to be heard that a better future depends on global partnerships - and the Arab nation is your partner, in both peace and progress.

The fact is, that even despite the burden of regional conflicts, the Arab world has been moving forward with a vision for the future. The private sector has put its talents and energy to work, expanding opportunity and accelerating economic growth. Young Arab professionals are guiding innovation and delivering on performance at NGOs and in the education and health systems. Business leaders have collaborated on landmark, region- wide initiatives to strengthen civil society. In Jordan and elsewhere, there is a serious commitment to good governance and reform.

This kind of effort makes an obvious, direct contribution to development. But it does more. It inspires people throughout society about the power of positive action. When a corporation builds libraries in impoverished communities; when Jordanian technology experts work with global corporate partners to put computers in classrooms and expand access to the Internet; when leading private sector enterprises commit to building housing for educators, they are not just investing in the future. They are serving as models to our youth; models of civic responsibility, and hope.

There is no question that the Middle East faces immense and very immediate challenges. The private sector is key. We will need almost 50 million new jobs over the next five years; by the year 2020, today's employment level must double. We can't afford a constant cycle of conflict, draining resources that are needed for priorities like education, health, and infrastructure. We must meet people's expectations for democracy, opportunity, and a better quality of life.

Such efforts must be home-grown. And young Arab leaders are already driving the way forward. But our American and other global partners have another important international role. Many of you have worked with our people; been to the Middle East; experienced our culture and heritage. You've heard the Amman Message and other initiatives, articulating Islam's abiding social values: respect for others; social justice; peace.

My friends,

Recent crises, especially the crisis in Lebanon, shout out the urgent need for a better partnership among us, especially for peace. The evidence is clear: piecemeal and unilateral

solutions do not work. None of us will be able to move forward until there is a comprehensive solution to the region's core problem. Palestinians must be empowered to shape a future of hope in a viable, sovereign Palestine. Israel must be part of the neighbourhood, making peace with all.

In 2002, the Arab states broke the old cycle with a landmark peace proposal. It promised security guarantees for Israel to live in peace with its neighbours - a sovereign, viable, and independent Palestine and a process that would lead to a comprehensive settlement.

The Arab action was an unprecedented opening. It laid the groundwork for specific actions to reach an end to conflict. It supports the two-state solution that is the only basis for lasting peace. And let us move swiftly, before more young lives, more young hopes, are destroyed.

My friends,

It is in our hands to make a difference. Your vision and leadership will make a critical difference. Over the next few days, you will be considering new private sector initiatives that can drive progress and peace. Your work can create a pattern for success, not for future generations only, but for today's societies.

In November, the Young Arab Leaders group will meet in Jordan. I welcome you all, and I look forward to the reports of your work here in New York.

To our American friends, I say: join us. With a collective will to act, our partnership can build a future that benefits us all.

Thank you very much.

Remarks by His Majesty King Abdullah II  
Before the 61st Session of the General Assembly of the United Nations  
USNew York  
19 September 2006  
In the Name of God, the Most Merciful, the Compassionate,

Madam President, President of 61st General Assembly, Her Excellency Haya Rashed Al-Khalifa,  
Members of the General Assembly,

Sheikha Haya, may I extend the warmest congratulations to you, on your election as president of the General Assembly.

Allow me also to say a word of gratitude and admiration to Secretary General Kofi Annan. Jordan applauds the progress achieved in UN reform under Secretary Annan's tenure. We

welcome especially, the recent creation of the Human Rights Council and the Peacebuilding Commission.

My friends,

I come before you today with a deep sense of urgency. Never has it been more important for the world community to act decisively for peace in my region.

The recent crisis in the Middle East is a crisis for all nations. There can be no just global order when aggression and occupation are permitted to take the place of international law. When these occur in a region as strategic as the Middle East the shockwaves run worldwide. Our youth are asking, where is the justice, where is the will, of the global community? We must answer them by establishing a lasting peace, based on the international legality we have pledged to uphold.

This means a new focus on the core problem. The region's contemporary crises are outgrowths of a central grievance, felt throughout the Middle East and indeed the world. That grievance, plain and simply, is Israeli occupation and the denial, over decades, of Palestinian rights. Until we end that wrong, conflict will breed more conflict, year after year.

The Middle East conflict has repeatedly come before this institution. And the UN's position has been repeatedly articulated in resolutions condemning aggression and occupation, affirming Palestinian self-determination and supporting a process for peace. Yet each year without progress has brought us another crisis, more suffering, more division. It is time to take a better path.

We must, of course, respond immediately to help those who suffer the terrible destruction of conflict. In Lebanon, we must ensure that the government can extend its sovereignty and control over all the Lebanese territories. The Arab world and the international community must exert every effort to support reconstruction and development.

These are vital measures. But in the Middle East, these are only partial measures. We can only solve the Arab-Israeli conflict by addressing the issue at its core; the restoration of internationally recognised Palestinian rights.

In 2002, the 22 Arab states - agreeing unanimously - led the way with a breakthrough peace proposal. Our vision and commitment is a viable, independent Palestinian state, living side-by-side with a secure Israel. Under the Arab Peace Initiative, Israel's security would be guaranteed, and the occupation of Palestine would end, in accord with UN resolutions.

Events show clearly that there can be no unilateral solution to the conflict. There must be a genuine partnership among all parties, in the context of international legality and justice.

Such a global partnership for peace is directly connected to the global partnership for development. Across the world, nations at peace are moving forward with economic growth and development, investing in education, building communities, helping to shape the future of the globe. But no nation succeeds in isolation. All nations, all people - especially our youth - must be able to share in a promising future.

We must make peace a priority. And we must do so now. No session of this great institution could make a greater contribution to a future of justice and hope.

Thank you.

Remarks by His Majesty King Abdullah II  
At the Canadian Ministry of Foreign Affairs  
CanadaOttawa  
13 July 2007

In the name of God, the Merciful, the Compassionate,

Mr Prime Minister,  
Distinguished Guests,  
My friends,

Thank you for your warm welcome. It is an honour to be with you today. I am very aware, in this building named for the late Lester Pearson, of Canada's long and distinguished role as a leader in global affairs and, especially, your many contributions to the future of the Middle East. Jordan's partnership with Canada was close to the heart of my father, King Hussein, and it remains vital to all of us today. On behalf of my fellow Jordanians, I thank you all.

My friends,

When Canada's Lester Pearson received the Nobel Peace Prize, he described the challenge facing our world not only as how to bring about a creative peace; but also, how to create a foundation for lasting security. And he understood, in a deep way, that the path forward must include an international community that comes together in consensus and mutual respect.

That was fifty years ago. Today, we are still facing the challenge of peace, security, and global respect. And it is clearer than ever that how we succeed still depends on our ability to come together, understand our shared interests, and act as one.

The fact is that in the 21st Century world, we share an economic and political destiny, just as much as we share the future of Earth's air and water. And in just the same way, we have a tremendous shared responsibility to work together to preserve what we value and shape the future we want. A future in which our people are safe, economic life can thrive, the heritage

we treasure can be passed to our children, and where inclusive, modern, civil societies can flourish all over the globe.

In the case of Canada and Jordan, this shared vision has been the basis of an enduring partnership. Our countries have worked together to promote human security through global policy institutions and on-the-ground activities like mine removal, training Iraqi civil defence forces and much else. We share a commitment to global economic opportunity, especially for the world's youth. And over many decades, we have been working together in the cause of peace.

One of the most important areas for our shared concern and cooperation is, without a doubt, the Middle East. It is an area where Canada has had a profound impact and, I believe, a vital position of continuing influence and respect. The very name of Ottawa is linked to some of the most pressing global issues - the Ottawa Convention against land mines and of course, the Ottawa Process to bring justice for Palestinian refugees. Where there is division, Canada's great tradition of pluralism has helped translate across the divides. And where there are seeds of hope, your leadership has helped progress grow.

Today, I come to ask Canada, our friend, to help shape a future of peace and opportunity in the Middle East. It is a challenge, I know, to think about the future at a time of crisis. But at no time is it more necessary.

There have now been 40 years of the Israeli occupation of Palestinian land - more than two generations raised in violence and frustration. The last meaningful political process between Palestinians and Israelis was so long ago that there are children in school today who were not even born then. And the potential division of the Palestinian people threatens peace prospects every single day.

These dangers are reality, but not the entire reality. Behind the headlines, millions of people on both sides need and want an end to conflict. Millions of Palestinians are united in their dream of a sovereign, independent Palestinian state. Millions of Israelis look to the day they can live in peace with their neighbours.

This is the seed of a future we must nourish. What happens on the ground in the next days and weeks is obviously critical, but the parties do not act in isolation. The international community can and must help shape the strategic direction of events. It begins by keeping the focus on the central objective. And that is a final settlement, which can stop an expansion of violence and clear the way to thriving, stable, civic life.

Arab leaders have worked intensively to move such a process forward. This March, our countries unanimously renewed the Arab Peace Initiative. It is a historic opportunity for a just, comprehensive and lasting settlement - one that brings an end to conflict, one that provides collective security guarantees for all the countries of the region including Israel, and at long last, one that provides a sovereign, viable, and independent Palestine.

My friends,

This is an initiative whose time has come - a time in which we can envision, and create, a new future for my region. To meet that need, our aim must be a political process with a clear direction and outcomes. There must be a timetable that plans for, and sees to the finish line, the establishment of a Palestinian state. And it must expedite Israel's implementation of required action, including a withdrawal from the Palestinian territories and an end to occupation.

But for all this to happen, the larger international community must be engaged. An urgent first step is support for the Palestinian National Authority, especially in its efforts to alleviate suffering and strengthen national institutions. Palestinian legitimacy must be supported in providing the governance that can fulfil people's aspirations and needs, earn public confidence, and preserve Palestinian unity.

My friends,

Achieving peace is only the beginning. Peace can only be sustained if the people of our region have the opportunity to lead a productive and satisfying life. For that to be possible, the economies of our region must maximise their potential. There are opportunities for investment in infrastructure, for participation in a growing private sector and for developing markets. In Jordan, men, women and youth are all engaged in national advances. The result is a well-defined strategy for development and reform.

Nothing is more important to the future. In my region, out of a total population of 325 million people, more than 60 percent are 24 or younger. That represents nearly 200 million young people who need and deserve a chance for a productive and rewarding life.

These young men and women of today are truly the Crossroads Generation. This is a generation who can choose to respect others and reach out in cooperation, who can enrich the future with their talent, creativity and energy, and who can develop our regional economy into a strong global entity. To share in the promise of the 21st Century, they need your support.

My friends,

Your great country has long been admired for its deep commitment to global fairness and justice. That leadership has never been needed more than now.

There is no doubt that the situation today is difficult. But we cannot let this stop us from acting. We must be ready to make bold decisions and decisive steps.



I ask Canada, our friend, to help. I ask you to help guide the path of peace in a region that has seen too much conflict, to open the door to prosperity for millions whose potential is yet unmet, and to welcome as a global partner, a region seeking its rightful place in the progress of our world.

Working together, we can achieve what the Middle East needs and the world needs: a future of security for this generation and the generations to come.

Thank you very much.

Remarks by His Majesty King Abdullah II

At the Woodrow Wilson School of Public and International Affairs - Princeton University  
USPrinceton, New Jersey

29 February 2008

In the name of God, the Merciful, the Compassionate,

Fifty-seven countries are not at peace with Israel today.

Fifty-seven countries out of 193 countries in the world.

Fifty-seven countries with a total population greater than Europe and the United States combined.

Fifty-seven countries, representing one third of the members of the United Nations.

Fifty-seven countries for whose citizens the conflict in Palestine is the issue of their time.

We must, therefore, ask the important question. What are the implications for global stability if this continues?

Today I assert that this must not continue and that 2008 is a critical year. Yes, at long last, this year, right now – we are in the best possible position to resolve 60 years of conflict between Israel and Palestine. The Arab and Muslim states have committed to an unprecedented and unanimous peace initiative. We have a chance to answer this third of the world who are not at peace with Israel and who demand freedom and dignity for the Palestinian people.

But time is running out and we need the United States of America completely involved, to influence the course of discussions, monitor progress, and help bridge the gaps to ensure a final agreement by the end of 2008.

It is difficult to exaggerate how great the stakes are, for Americans, for Arabs, for Israelis, and indeed for the whole world.

But I am not here today to speak only of the Israeli-Palestinian conflict. I am here to speak to you, the scholars of the Woodrow Wilson School of Public and International Affairs, of the critical importance of a long-term strategic American involvement in the development of the Middle East.

I am here to explain that such a commitment is an opportunity to transform the strategic landscape of the Middle East for years to come.

I am here to speak of what must, I repeat, must happen if our world is to be safe.

I know that optimism does not come easily in academia. But I do know about the visionary thinking that is the scholar's gift. Today, I ask you to employ visionary thinking to consider a short- and long-term strategy that will ensure a viable, stable, prosperous Middle Eastern region and a safe and secure world for all.

America's involvement is a critical success factor of such a strategy. We need a strong authority that can act and act swiftly. We need to act now for time is running out. The continuing confinement of the Palestinians in Gaza everyday creates a greater radicalism amongst Palestinians and invites other actors within the region to operate on their behalf. The long period of conflict has allowed new ambitions, influences, and capabilities to appear. They are echoed in Iraq's armed sectarian division, in the attacks on Lebanese sovereignty, and in the power-projection by state and non-state actors.

There are many other serious threats.

Security, opportunities for youth, economic development, resource scarcity, chronic conflicts, institutional challenges and nuclear weapon proliferation, are just some examples of the major challenges we face. You are a prime example of some of the gifted, ambitious youth of America. We are acutely aware of the urgent needs of our own youth who make up 70 per cent of my region's people. It is the largest youth cohort in our history. Like American youth, Internet communications have given them an unprecedented view of the world. In their own region they see evidence in extremist messages of hatred and isolation. They see a lack of opportunities and an uncertain future. But they also see the prosperity and freedom that countries and regions in peace can offer.

We must meet the expectations of this younger generation. In my region, we expect to need 200 million new jobs by 2020. Creating these opportunities will require investment and partnerships to develop new infrastructure, meet energy and water needs and improve public services and education. A strong cooperative Arab-American strategic partnership must be created.

But today my friends, we must contemplate.

I pose these questions for your consideration...

Will my region plunge into more chaos and violence, where extremism rules? Or will it be a peaceful, developing region?

Will it be a region focused on conflicting radical ideologies fuelled by the manipulation of sectarian division? Or will it be a region reaping the benefits of globalisation and strong global partnerships?

Will it be a region that rejects Western alliances, perhaps violently, because they have become far too difficult to achieve? Or will it be a region that is a global partner in progress and prosperity with the West?

The choice is ours. But we must act and time is running out. The dangerous combination of new technology, terrorism and the drastic consequences of economic underdevelopment, all continue to add to a potentially catastrophic situation on the ground.

We must act this year if we are to achieve the first important advancement towards a strong Middle Eastern region.

A year ago, before the US Congress, I urged an all-out American commitment to lead the way forward. I said then what I repeat today: that the wellspring of global division, the source of resentment and frustration within the region and far beyond, is the denial of justice and peace in Palestine. The beginning of a long-term strategic partnership between the Arab world and the United States must begin with the resolution of the Israeli-Palestinian conflict.

America is the only world power capable of ensuring that the parties stay on track and on time in their current negotiations. And America is uniquely placed to build international support throughout the peacemaking process. Resolution of this conflict will be critical if we are to confront the other serious regional challenges.

But time is running out. This year is an unprecedented opportunity to reach a comprehensive settlement between Israel and all its neighbours.

In Israel, there are those who oppose any movement toward resolution. There are politicians who do not want peace with Palestinians and who reject a two-state solution. I disagree. Israel's security cannot depend indefinitely on occupation, walls, and the Israeli military. Real security for Israel will occur when it is a neighbour among neighbours, an economy among economies, a people among people working together towards the achievement of common goals and bright futures.

In America, there are those who oppose any further involvement. There are those who say it is not America's business. I disagree. You will all know that historically, success in Middle East peacemaking was achieved when the United States stepped in and drove the negotiations.

A victory by the enemies of peace, freedom, stability and moderation cannot be an option. If we miss today's opportunities, peace will be set back, perhaps for decades. Extremists will continue to act. The forces for moderation and positive change will weaken. Global divisions

will not only endure but also possibly deepen. Questioning of the West's effectiveness, and commitment, may grow. All of these will have consequences not only for my region but also for the world.

My friends,

Division and hatred have eroded understanding and agreement. They have played into the hands of the enemies of humanity - those who attacked the World Trade Centre, those who would divide multi-cultural Europe, those who, right now, seek to tear my region apart.

If we fail to take the necessary steps to resolve the core problem of the region, it will become significantly harder for the countries of the Middle East to work in partnership with America in the future. I fear radical ideologies will determine the political and social agendas in many of our countries. The region will move further away from our vision of moderation, prosperity and peace. It will move further away from the common principles of mutual respect and partnership on which we want to base our relations with the United States and the West.

Every day another child in my region grows up with frustration and hatred in his or her eyes.

Every day another child grows up with aggression because that is all they have known.

Every day young people lose hope because they cannot get jobs and they cannot see opportunities.

Princeton scholars,

Speaking here today, I am especially aware of the role of scholars and students in making progress happen. Where others see unsolvable problems, you see paths that can lead to answers and successful action. This is the tradition of great scholarship of which you are a part.

Today I ask you to bring the tradition of scholarship to the challenges that lie ahead, and join me in thinking about the reality that together our countries can create:

An end to 60 years of conflict, violence, and occupation;  
A homeland for Palestinians, offering hope, respect, and a future;  
Security and new acceptance for Israel, within its neighbourhood and around the world;  
A strategic region that is able to turn to the future as peace takes hold;  
And, a new partnership between your country and the Arab and Muslim peoples,  
transforming the strategic landscape and creating new horizons for progress and peace.  
It is an honour to be speaking to you all today, and I thank you, President Tilghman, for your warm reception.

I should like to conclude by drawing from the wisdom of the great American after whom this school was named.

Woodrow Wilson said,

“Friendship is the only cement that will ever hold the world together. There must be, not a balance of power, but a community of power; not organised rivalries, but an organised peace.”

T

Remarks by His Majesty King Abdullah II

At Oxford University

UKOxford

04 June 2008

In the name of God, the Most Merciful, the Compassionate,

Mr. Chancellor,

Distinguished Members of the University,

My friends,

It is a wonderful experience to join you today. For me, only one day at Oxford rivals this one, and that was the day in 1982 that I entered university, and joined this extraordinary community of fellowship and knowledge.

I am especially pleased to receive this honour from the hands of a champion of global dialogue, my friend Chris Patten. But may I say, I see this honour as one for all Jordanians. It is they who inspire me – their achievement and tenacity; their hard work, and their loyalty to our nation. The responsibility I bear as a Hashemite is dedicated to their future. So today, it is on behalf of all Jordanians, that I do most gratefully accept this honorary degree.

My friends,

Since 1190 Oxford has been welcoming international students, encouraging the most rigorous enquiry and inspiring innovative thinking. This University is the wellspring of a worldwide community of graduates, men and women energised by its standards of excellence and social responsibility. Scholars and scientists here have revolutionised human understanding and advanced human welfare – not for your country only, but for the world.

It is with a deep respect for these global contributions that I wish to speak today. I wish to speak about the urgent need to understand and act upon the threat facing the Middle East today. I wish to speak about the need to prevent global disaster by preventing regional disaster. I wish to speak about the opportunity to make my region a contributor to world stability, rather than a source of radiating crisis.

Today, for much of the developed world, wars are history. For the Middle East, they remain a constant. Our region is in the firing line of extremist ideologies that seek to divide and control. Their strategy is to promote confrontation, break down moderation, and sever cooperation with the West. This minority of extremists have driven conflicts that are now increasing at an unprecedented rate. New actors, new military doctrines, and advanced weapons capabilities are transforming the security landscape. Frustration over the Palestinian situation has fuelled radicalism. There has been no easing of the public perception that the global system has ignored the Arab and Muslim world.

I do not need to say that, for a region as strategic as the Middle East, these trends are a crisis - not only for us, but for you. Our regions are deeply intertwined - in trade, in the movement of peoples, in security, in ideas. And we have a critical shared interest in how the challenge is met, whether we find the right answers, and whether we find them in time.

Powerful models are at hand. Our globalising world has brought opportunity and progress, not just because of economic efficiencies, but because of its expanding partnerships. Here, and elsewhere, people are seeing that peaceful engagement, not hostility, is the way to a better future. It is a path that Europe itself has spearheaded, through historic reconciliations and a pioneering regional community. Today the European Community joins 27 countries and 500 million people, with, by the way, at least six religions, with Islam as the second largest – all forming a diverse community that cooperates under the rule of law for mutual benefit.

It is moderation, not extremism, that opens the way to that future – through co-existence, cooperation, and all the benefits they entail. I believe this path is essential for my region. But to achieve it, we must work together – boldly, effectively – to create the strategic space for peace and progress to grow.

The first step is – must be – peace at the core. Justice and statehood, finally, for the Palestinian people.

We meet here today, on a day – June 4th – that resonates in the ears of every Arab. June 4th, 1967, marks the last day a Palestinian lived free of occupation. The next day, June 5th, began 41 years of whiplashing violence, invasive settlements, a crippled economy, and harsh and multiplying restrictions on life. For Israel, it has been 41 years of incessant conflict. Sixty years after its founding, it is still not recognised by 57 countries representing one-third of the members of the United Nations, with a total population greater than Europe and the United States combined.

While the conflict continues, people on both sides lose. It is time to help people win. For Palestinians, justice and a future, in an independent, sovereign, and viable state. For Israelis, recognition and security – a security that isolation, behind walls and military forces, can never bring.

The groundwork is in place, the opportunity is here. And Europe, especially the United Kingdom, can make a critical contribution as honest brokers in negotiations, as sources of security support and as investors in the Palestinian economy. Your efforts will send a global message to young people, young Muslims especially, that the international community can and will deliver on its promise of justice and hope.

Nothing is more important for the youth of our region – 200 million young men and women – the largest and the fastest growing youth cohort in our history. They see, in a thousand different ways, all this century has to offer, and they want to share in that promise. Yet most of our countries are still developing their way out of poverty. Even in this plugged-in generation, illiteracy remains unacceptably high, especially for women. Our youth face some of the world's worst unemployment rates.

We must respond. Over the next few years, there needs to be wide-scale, tangible solutions to the issues that affect people's lives: community development, access to health care, affordable energy, secure water resources, good schools, gender equality and jobs, jobs, jobs – some 200 million more – for college graduates as well as school-leavers.

We in the region are determined to lead the way. We look to those who understand the stakes to join with us. In Jordan, we have pressed forward, in spite of the obstacles, making a major commitment to development and reform. Our people are participating more actively than ever in the larger world, rejecting the voices of extremism and hatred. Our country is the home of the Amman Message, with its global message about Islam and its call for tolerance, mutual respect, and human equality.

My friends,

Jordan has taken risks for a future of peace in our region and the world. I hope we can look to the members of this university for intellectual, moral and practical support.

Bonds between the Arab, Muslim, and British peoples go back hundreds of years. In the medieval Canterbury Tales, Chaucer tells us the mark of a learned English doctor: to be “well versed” in the work of Al Razi, ibn Sina, and ibn Rushd. ibn Sina's The Canon of Medicine was a standard text for European medical students well into the 17th century.

Today, such academic cross-fertilisation continues. I treasure this honorary degree as a symbol of the close relationship between Oxford and the Arab world. Academic exchanges and joint projects have brought our people together. Our students have been welcomed here. Alumni make a major contribution. Jordan's Oxonians are in key roles across society – banking, telecommunications, humanitarian work, public service, and more.

Such interactions between East and West are vital today – and we need many more. Not just official delegations, but students, teachers, entrepreneurs, civic leaders, development

innovators and others. If we refuse to accept the walls that others would create, imagine what we can achieve. What new thinkers will emerge? What new art and inventions? What new breakthroughs will enlighten our understanding?

Millions of people in the Middle East want to share in creating a century of progress and peace. Let us not allow false divisions to hold us back. Let us not accept polarisation. Together, we can leave old conflicts, old inequalities, old ignorance, in the past. Together, we can confront the attack on reason and co-existence. Together, we can make a reality of our shared humanity - European, Asian, Arab; Muslim, Christian, Jew; East and West.

Thank you very much.

My friends,

In our time, we are urgently called to the way of peace. Throughout the world, understanding and trust among peoples of different faiths and cultures have been eroded. This is especially apparent among adherents of the three monotheistic faiths - more than half of the global population. Misinformation and stereotypes - created by a few - are increasingly shaping perceptions of the Other ... creating fears, suspicions, and even hatred.

To reverse the tide of resentment and fear, communication is vital. There must be a new and global dialogue among people of different faiths and civilizations. Such a dialogue is essential, to reveal the commonalities that unite humanity. But it does more. It teaches people to respect their differences. It opens eyes and hearts to the beauty of diversity. It helps disentangle fact from fiction. And it exposes the fraudulence of extremist teachings.

In Jordan, we have made inter-faith dialogue and understanding a priority. The Amman Message is an explanation of the true nature of Islam, and a call to peaceful coexistence among all human beings. It has been supported by more than 500 of the world's leading Muslim scholars from all eight schools of Islamic jurisprudence. It has been endorsed by the Organization of the Islamic Conference, representing Muslim countries the world over.

Jordan is proud to continue this work, including support for other global initiatives. One such is "A Common Word", an overture from Muslim scholars to their Christian counterparts, declaring the common ground between Christianity and Islam.

In all this work, we seek to advance a global dialogue, one that can help redirect the course of our future, away from hostilities and towards peace. This Summit shows that support for such dialogue has become a priority at the highest levels. Now, together, we must make it our common task to move the discussion forward: out of the conference rooms; and into the world's homes, schools, offices, and lives.



Your Majesties, Your Excellencies,

It is impossible to talk about interfaith harmony, especially between East and West, without also discussing conflict resolution in the Middle East.

The conflict between Israel and the Palestinians is the core conflict in our region. It is a political conflict, and it demands a just, negotiated solution ... one that brings statehood and freedom for Palestinians and security and more regional acceptance for Israel. For with every day that justice is denied to Palestinians; with every day that the occupation prevents a positive future; the regional and global impact has grown. Resentment and frustration are felt throughout the region, and indeed, throughout the world. Millions of people, especially young people, question whether the West means what it says about equality, respect and universal justice. Meanwhile, extremists - Muslim, Christian and Jewish - are thriving on the doubts and divisions.

My friends,

I can think of no more effective way to ease East-West and inter-faith tensions than to end this divisive conflict with a peace based on our deep, shared values: justice; respect for international law; and the right of all people to live in dignity.

As we move forward with tangible solutions to this and other regional conflicts, we must also make tangible strides in communication. That means a sustainable, institutional effort to spread tolerance and acceptance through practical initiatives across the globe.

Youth are vital to success. I hope that from this Summit, we will launch student exchanges and joint university projects, to bring young people together, and show them that what humanity has in common is far greater than what separates us.

I also hope we can encourage leadership from the world's media, large and small. No group is in a better position to get the truth out, on every continent: that people of different faiths can live in peace and harmony ... that when we do, we are more equipped to face the challenges ... that only together, will we realize the prosperous future all of us seek.

Your Majesty King Abdullah,

Dear Friends,

This milestone gathering is not the end, but the beginning, of our journey. Your participation has helped us make a giant step forward on the path to global peace and acceptance. It is now up to all of us to walk the path that takes us to our goal.

Dialogue among civilizations is not a luxury. It is a necessity. Indeed, it is a duty that we must all fulfil, if we are to end the growing tensions that threaten global stability.

Today, everywhere in the world - the Americas, Europe, the Middle East, Africa, Asia - people of faith and goodwill are coming together.

I pledge to you all, that Jordan will be by your side, a full partner, in every step of the way. Let us together, dare to shape a new future, a future free from injustice, free from hatred, free from cultural misconceptions.

God bless you, and reward your efforts.

Thank you.

Peace, God's mercy and blessing be upon you.

Remarks by His Majesty King Abdullah II

At the Centre for Strategic and International Studies

US Washington, DC

24 April 2009

In the Name of God, the Most Merciful, the Compassionate,

Thank you, General Scowcroft. I am delighted to be with all of you this afternoon. CSIS has been a tremendous source of understanding about the important relationship between the Middle East and the United States. It is an honour to be invited to join in your dialogue.

My Friends,

Today I want to talk about the Palestinian-Israeli conflict, which has almost defined the modern history of my region. But I do not want to talk about missed opportunities. I want to focus on the urgency of not missing any more ... and on why, and how, the United States can lead.

The US has a stated, strategic interest in ending this conflict. Few crises in history have presented such a potent mix of threats - from the regional instability and violence it promotes - to the worldwide divisions it has caused, divisions actively exploited by extremists. But, there have been equally few situations where a just solution could bring such powerful benefits - not only to the parties, not only to the region but to the world as a whole.

Yet time, my friends, is not on our side. Every day we lose makes the conflict much harder to resolve. And that is a danger to all of us.

I know this is understood by President Obama and his team. The President gave early signals that Middle East peace will be a priority for the United States. We in Jordan welcome his commitment and engagement. And we are not alone. Every country in the Middle East - and perhaps even the world - sees the United States as being the key to achieving peace. America's strategic interests will be advanced by a peace settlement. And in the eyes of the world, American credibility will be advanced as well.

Tackling the issue head-on is now imperative. Success urgently demands not more process but more results. That means a clear plan to reach a comprehensive peace - one that builds on the achievements of previous negotiations. And there must also be a vigorous leadership commitment, to ensure negotiations move fast towards reconciliation on the basis of the two-state solution.

My Friends,

We do not have time to engage in yet another open-ended process. We have seen what comes of process without progress. Every missed opportunity has alienated more people on both sides. Such a course increases distrust and difficulties and fuels those who seek to carry the parties down the path of confrontation.

Yet this path cannot help either party get where it needs to be. For Palestinians to reap the promise of the 21st century, for Israelis to achieve the enduring security they seek, there must be an end ... to occupation and confrontation ... to settlement-building ... to unilateral actions in Jerusalem. There must be a settlement that fulfils the legitimate rights of both parties - the right of Palestinians to statehood and the right of Israelis to security.

One of the vital functions the United States can play right now is to help its friends think and act in these strategic terms. That means keeping the focus on where the parties want to be - in ten, twenty, thirty years and more; the hopes and horizons for themselves and their children - and then setting a direction towards that future, now.

Through its own focus, through its own resolve, the United States will set the standard. Events are already testing American credibility. These include the Israeli voices for turning back the clock on negotiations - to disestablish the established agenda for peace. And they include extremist voices in the Arab world that preach war. I hope that the United States will make it clear that it will not accept retrograde movement. The elements of a settlement are known; the agenda for negotiations is agreed; there is a clear objective: two states, each sovereign, viable, and secure. Such a settlement is a vital US interest, and it is equally vital to your interests that the world sees the US lead the way.

Indeed, the groundwork is there. The two-state settlement has been agreed by the parties and the entire international community. And for seven years, against all provocation, the landmark Arab Peace Initiative has held. The initiative lays out the parameters of a comprehensive settlement: ending the occupation; creating a Palestinian state; and providing

security guarantees and normal relations for Israel. Muslim countries around the world have also expressed their support. This offers Israel a place in its neighbourhood and more: acceptance by the one-third of the UN members - that's 57 countries - that still do not recognise Israel.

By its unanimous voice, by its serious approach, the Arab Peace Initiative is the most important proposal for peace in the history of this conflict. We have made our choice: a comprehensive peace that meets the legitimate needs of all. Israel now has to make its choice. To integrate into the region, accepted and accepting, with normal relations with its neighbours. Or to remain fortress Israel, isolated, and holding itself and the entire region a hostage to continuing confrontation.

And let me be clear: any Israeli effort to substitute Palestinian development for Palestinian independence cannot bring peace and stability to the region. The path for peace can go only through the two-state solution. No other solution can offer the justice that people demand and expect. And no other solution can give people a reason to take the risks peace requires.

Israel must know that attempting to delay this solution will be disastrous for its own future as well as for the future of the Palestinians. I cannot emphasise enough how important US partnership is, to help Israel accept the opening the Arab world has offered, work with us, and move forward.

Now is the time for the United States to lead, to ensure that no more time is wasted. Failing to act means that we will all lose. The status quo is simply untenable. The dangers are too many and too big to ignore. A moment of truth is here, for all who claim to seek peace and justice. It is a time for partnership, courage and action.

It begins with an effective peace plan for 2009 and beyond - a plan of negotiations that can achieve concrete results quickly and stop a drift towards confrontation. I say plan, not process, for a reason. The very term "peace process" is an artefact of history. When it was coined in the 1970s, the idea was to break the decades of deadlock by taking an incremental approach. And in the following decades we did see breakthroughs. Great leaders like my late father His Majesty King Hussein and Prime Minister Yitzhak Rabin gave their all to make progress happen.

Today, I do not diminish those achievements when I say that this old idea has seen its day. The peace process must end because we have reached the time for the end-game, in which all sides can win.

Allow me to touch on some areas where creative US leadership can advance that goal.

First is in understanding the regionwide framework for action. The Palestinian-Israeli conflict does not take place in a vacuum. Regional crises and events are deeply interconnected. Successful policy must be part of a holistic approach. This includes a division of labour with

regional partners. One example is the work Arab states are already doing to encourage Palestinian reconciliation. International support will advance this effort. In this and similar actions, US policy can help empower the region's forces of moderation.

A second key area for US leadership is reinforcing the foundation for peace. Development aid will not succeed if it is designed as a substitute for Palestinian independence. But independence will be most successful when it delivers opportunities for fruitful, normal daily life. Benefits and incentives need to be devised that will create and sustain the conditions for coexistence and progress.

A third area for US leadership is in the powerful messages your actions can send -especially, by your response to Palestinian suffering. Signals are delivered when the US ensures relief and rebuilding in Gaza and provides humanitarian aid in the West Bank. But signals are also sent when your country acts or fails to act against the daily hardships of West Bank life ... against illegal settlement building ... against Israeli actions to force Jerusalem's Arab, Muslim and Christian population out or to threaten Muslim and Christian holy sites. The US commitment to Palestinian statehood must be unambiguous, in deeds as well as words. This is central to America's standing not only in the region but the entire Muslim world.

Let me say, Arabs and Muslims throughout the world took note of the President's inaugural pledge, for a new partnership based on mutual respect and mutual interest. His outreach since then has been well received in the Arab world.

This good beginning needs to move forward without any break. A high-level US effort is needed to regenerate bilateral negotiations. And when the parties get to the table, US support must continue. Where there is deadlock, let the US break the impasse by proposing its own creative solutions. Beginning to end, the focus must be a final peace agreement, one that reflects the only viable solution to this conflict: the two-state solution, which will open the door to comprehensive Middle East peace.

My Friends,

My Friends,

This year marks sixty years of diplomatic ties between Jordan and the United States. Our partnership has been tested by crises. We have talked truth to each other ... listened to each other ... and worked together. We have had differences. This is the way of friends. But we have never lost sight of the value of our strategic partnership or the vital goals we share: peace, prosperity, security.

Today, we stand together at yet another critical moment. The regional problems are complex and real. But in our world, we have seen rapid, positive transformations when strategic interests are clear. The parties, the region, the world, all deeply need this peace. And all are watching to see how America will lead.

I believe that peace can succeed - and we should settle for nothing less. In that effort, I pledge Jordan's continued partnership. And just as we ask the parties to do, let the friends of peace, too, think ahead to the strategic picture. Ten years from now, meeting here, we could be - we should be - talking about the challenges of life after peace and how to advance our new era of global coexistence. But to do that in the year 2019, we must also be able to say: our countries did what needed to be done, back in 2009, with courage and action.

Thank you very much.

At the World Economic Forum on the Middle East

JordanDead Sea

15 May 2009

In the Name of God, the Most Merciful, the Compassionate,

My Friends,

Powerful solutions are driven by powerful goals. And I am here to urge you: accept no limits on your goals today. At this year's Forum, you will be addressing the most critical issues of our time. Let your answers be just as bold.

Answers that not simply help our countries get through the global economic downturn but ensure the region emerges as a powerhouse: the go-to place for opportunity and wealth-building and a determining factor in reshaping the global economy.

Answers that not only boost education and research capacity but make our region the house of genius for the 21st century, the source of innovation, discovery and expanded horizons.

And answers that not only end conflicts but create a thriving, secure, comprehensive peace.

Make no mistake about it, these goals are within reach. And yours is the capability, yours is the know-how, yours are the partnerships that will help put them in our grasp.

I know that it is easy, in the hard days of 2009, to feel that events are being shaped elsewhere. A global recession that began far from our borders has affected growth and shaken confidence on every continent. In political and security affairs, short-sightedness has prevented the resolution of conflicts. And occupation and the violation of the basic rights to freedom, to dignity and to a life of opportunity still deny our region the peace it needs to realise its full potential.

These challenges are powerful but they do not have the power to break this region or make its future. That make-or-break power is ours. With the right choices, with courage and will, we can, and must, create the future our people deserve.

It begins with a regionwide consensus on action - a home-grown, home-based approach to unity, progress and peace.

Nowhere is this unity more evident than in the Arab Peace Initiative - the historic opening to a better future for every citizen in this region: negotiated settlement, that will finally end the Palestinian-Israeli conflict on the basis of the two-state solution, which meets the legitimate right of the Palestinians to freedom and statehood and offers Israel the security guarantees and normal relations it needs.

We have committed. So, now, must Israel. The Arab Peace Initiative has offered Israel a place in the neighbourhood and more: acceptance by 57 nations, the one-third of the UN members that do not recognise Israel. This is true security - security that barriers and armed forces cannot bring.

But the time to act is not indefinite. Every delay has brought more danger, not only for the parties but for the region and indeed, the world. There must be no more missed opportunities, no more process without progress. What is needed is real action and real results: a clear plan for comprehensive negotiations and a vigorous leadership commitment to reach the end-game.

This is the message I conveyed to President Obama when I met with him, just a few weeks ago. I was encouraged by the President's commitment to the two-state solution, within a regional approach to a comprehensive peace. I was encouraged that in all my conversations in Washington, it was clear that people know: inaction is not an option.

The new American commitment has now opened an opportunity to change the direction of events. But no single step will get us where we need to be. Just as the United States has committed to momentum, so we in the region - and all our friends - must keep the focus on results. Let us carry the message worldwide: the groundwork is in place. There are no excuses for failure.

My Friends,

The Arab Peace Initiative is just one expression of our region's determination to shape its own positive future. That same sense of purpose and unity must govern economic and other activity as well.

Challenging economic times call upon us to focus more clearly than ever on the essentials - the investments and opportunities that will build economic resilience as well as meet our peoples' needs.

To succeed, we must build regional multi-sector, multi-skill partnerships. No single entity owns the region's most pressing challenges - or their solution. Responsive, up-to-date

education systems, the management of water and other scarce resources, health and environmental solutions, urban and community development: these and many other regional priorities can be addressed most effectively by combining our capabilities.

Friends,

A vital dynamic in this Forum is your attention to our most important home-grown asset: youth. The 21st century has brought the Middle East its largest youth population in history. In only a few years, we will be looking to these 200 million young men and women for our region's strategies, partnerships, and solutions. They need and deserve all the tools we can give them, to become the great leaders they are capable of being. To the region's young leaders, know this: you have the power to transform the future. Set powerful goals. All of us here today, will help.

My Friends,

These Forums are forward-looking events. But today, we must also look back. This day, May 15, throughout the world, people commemorate the Nakba, the Catastrophe that began for the Palestinian people 61 years ago. At family tables tonight, there will be elders who can tell of entire lifetimes of sorrow and loss - and newborns, who may be the fourth generation - the fourth generation! - born into conflict and an uncertain future.

This history has been a catastrophe not only for Palestinians, but for the entire Middle East - I would say the entire world. As we join in remembering all that has been lost, as we feel compassion for all who have suffered, let us also commit ourselves to joining the solution as well.

Together, through our own initiatives, I believe our region can lead the world away from destruction and toward the future we need: an undivided Middle East, empowered by cooperation, and determined to lead; an era of promise for every one of our children, for lives of dignity, opportunity, and hope.

Your work here will help make that future real. I thank you for being here. And I wish you the very best success, now and in the days and months ahead.



(Appendix 3): A summary of frequencies and collocations of the five nouns in Arabic

| إسرائيل<br>(israil)<br>إسرائيلية<br>(israiliyyah)<br>الإسرائيلي<br>(al-israili)<br>الإسرائيلي<br>(al- Israiliyyah) | العرب<br>(al-arab)<br>العربي<br>(al-arabi)<br>العربية<br>(al-arabiyyah) | الفلسطيني<br>(al-falastini)<br>الفلسطينية<br>(al-falstiniyyah)<br>فلسطين<br>(falastin)<br>فلسطينية<br>(falstiniyyah)<br>الفلسطينيين<br>(al-falastiniyyīn) | الإرهاب<br>(al-irhab) | الإسلام (al-islam)<br>الإسلامي (al-islami)<br>الإسلامية (al-islamiyyah) | Keywords                |
|--------------------------------------------------------------------------------------------------------------------|-------------------------------------------------------------------------|-----------------------------------------------------------------------------------------------------------------------------------------------------------|-----------------------|-------------------------------------------------------------------------|-------------------------|
| 21                                                                                                                 | 175                                                                     | 94                                                                                                                                                        | 28                    | 75                                                                      | Frequency of occurrence |

|                                                                                                                                                                                                                                                              |                                                                                                                |                                                                                                                                                                                              |                                                                                                                                  |                                                                                                                                                                           | Collocations                                                                                                         |
|--------------------------------------------------------------------------------------------------------------------------------------------------------------------------------------------------------------------------------------------------------------|----------------------------------------------------------------------------------------------------------------|----------------------------------------------------------------------------------------------------------------------------------------------------------------------------------------------|----------------------------------------------------------------------------------------------------------------------------------|---------------------------------------------------------------------------------------------------------------------------------------------------------------------------|----------------------------------------------------------------------------------------------------------------------|
| الضغط على إسرائيل، لوقف سياسات العدوان والحصار والإغلاق والاستيطان (aldaght ealaa 'iisrayiyl, liwaqf siasat aleudwan walhisar wal'iighlaq walaistitan)                                                                                                       | الأردن وسيظل بعون الله وفيّاً لانتمائته العربي (al'urdunu wasayazal bieawn allah wfyaan liantimayih alearabii) | القضية الفلسطينية (alqadiat alfilastinia)                                                                                                                                                    | وأعمال العنف والإرهاب التي تمارسها بعض الجماعات والمنظمات (wa'aemal aleunf wal'iirhab alty tumarisuha bed aljamaeat walmnzzma)   | (din alaietidal waltasamuh w muharabat alairhabyin)                                                                                                                       | الذين يقتلون الأبرياء باسم الإسلام والإسلام منهم بري (aladhin yaqtulun al'abria' biaism alaslam walaslam minhum bry) |
| معدات طبية لمعالجة ضحايا العدوان الإسرائيلي (mueaddat tibiyat limuealajat dahaya aleudwan al'iisrayiyl)                                                                                                                                                      | محيطه العربي (muhituh alearabi)                                                                                | وعلى ذلك سنستمر في دعم الأشقاء الفلسطينيين (waealaa dhlk sanastamiru fi daem al'ashiqqa' alfilastiniin )                                                                                     | إقامة الدولة الفلسطينية المستقلة على التراب الفلسطيني (i'iqamat aldawlat alfilastiniat almustaqilat ealaa alturab alfilastinii ) | فهم خاطيء لمباديء الشريعة الإسلامية السمحة واحكامها (fahum khati' limubadi' alshryet al'islamiat alsamhat waihkamiha)                                                     |                                                                                                                      |
| حل عادل وشامل للصراع العربي الإسرائيلي (hala eadil washamil lilsirae alearabii al'iisrayiyl)                                                                                                                                                                 | سيدنا محمد النبي العربي الهاشمي (sayiduna muhamad alnabii alearabi alhashim)                                   | للأشقاء الفلسطينيين (lil'ashiqqa' alfilastiniin )                                                                                                                                            | لأشقاء الفلسطينيين (aljahilin aldhyn yumarisun 'aemal alqatl wal'iirhab biaism al'iislam, wal'iislam minha bry)                  | والتحديتات التي تواجه الأمة الإسلامية (waltirkizela bara'at alaslam min hadhih al'afkar kawnuh din altasamuh walsalam)                                                    |                                                                                                                      |
| لإيجاد تسوية عادلة وشاملة للصراع العربي - الإسرائيلي. (li'iijad taswiat eadilat washamilat lilsirae alearabii - al'iisrayiyl)                                                                                                                                | ويوم الثورة العربية الكبرى، (wayawm althawrat alearabiat alkubraa)                                             | نتصدى لأيّ مخطط يهدف إلى حرمان الأشقاء الفلسطينيين من حقهم في العودة إلى وطنهم (ntsdda lay mukhatat yahdif 'iilaa hirman al'ashiqqa' alfilastiniin min haqahum fi aleawdat 'iilaa watnihim ) | وليس دين العنف والإرهاب، أو التعصّب والانغلاق (walays din aleunf wal'iirhabi, 'aw alttessb walainghilaq )                        | والتحديتات التي تواجه الأمة الإسلامية (waltthdyat alty tuajih alammt al'islamy)                                                                                           |                                                                                                                      |
| إن تحقيق السلام بين الدول العربية وإسرائيل لا يمكن الوصول إليه، إلا إذا تعاملت إسرائيل مع المبادرة العربية (i'ina tahqiq alsalam bayn alduwal alearabiat wa'iisrayiyl la ymkn alwusul 'iilayhi, 'illa 'iidha taeamalat 'iisrayiyl mae almubadarat alearabia) | رسالة الثورة العربية (risalat althawrat alearabia)                                                             | إقامة دولتهم المستقلة على التراب الفلسطيني (muamarat ealaa alshaeb alfilastinii )                                                                                                            | يتعرض فيها الأردن إلى مثل هذه الأعمال الإرهابية (yataearad fiha al'urdunu 'iilaa mithl hadhih al'aemal al'iirhabia)              | لقد أرسى الإسلام عبر العصور أحسن القواعد للعلاقات الإنسانية (laqad 'arsaa al'islam eabr aleusur 'ahsan alqawaeid liilealaqat al'insany)                                   |                                                                                                                      |
| وتعيش إلى جانب إسرائيل (wataeish 'iilaa janib 'iisrayiyl)                                                                                                                                                                                                    | الجيش العربي (aljaysh alearabiu)                                                                               | مؤامرة على الشعب الفلسطيني (al'urduniyiyn aladhin hum min 'asul filastinia )                                                                                                                 | تعرضت لمثل هذه الأعمال الإرهابية (taearadat limithl)                                                                             | لكنّ المشكلة اليوم هي ما تتعرّض له الأمة الإسلامية من حملات التشويه والإساءة (lkn almushkilat alyawm hi ma tterrd lah alammt al'islamyt min hamalat alttshwyh wal'iisa'a) | يرفعون شعارات إسلاميّة في تشويه صورة الإسلام والمسلمين (yarfaeun shiearat                                            |
| ولتتعم إسرائيل بالأمن الذي يشكل هاجسها الرئيسي (walituneam                                                                                                                                                                                                   | سبيل حماية المواطن العربي (sabil himayat almuatin alearabii)                                                   | الأردنيين الذين هم من أصول فلسطينية (al'urduniyiyn aladhin hum min 'asul filastinia )                                                                                                        | الدعم والمساعدة للأشقاء العرب سواء في فلسطين أو في العراق (aldaem walmusaeadat                                                   | يرفعون شعارات إسلاميّة في تشويه صورة الإسلام والمسلمين (yarfaeun shiearat                                                                                                 |                                                                                                                      |

|                                                                                                                                                                                                                                                                                                                                                                                                                                                                                                                                                                                                                                                                                                                                                                                                                                                                                                                                                                                     |                                                                                                                                                                                                                                                                                                                                                                                                                                                                                                                                                                                                                                                                                                                                                                                                                                                      |                                                                                                                                                                                                                                                                                                                                                                                                                                                                                                                                                                                                                                                                                                                                                                                                                                                                                                                                                                                                                 |                                                                                                                                                                                                                                                                                                                                                                                                                                                                                                                                                                                                                                                     |                                                                                                                                                                                                                                                                                                                                                                                                                                                                                                                                                                                                                                                                                                                                                                                                                                                                                                                                                                                           |
|-------------------------------------------------------------------------------------------------------------------------------------------------------------------------------------------------------------------------------------------------------------------------------------------------------------------------------------------------------------------------------------------------------------------------------------------------------------------------------------------------------------------------------------------------------------------------------------------------------------------------------------------------------------------------------------------------------------------------------------------------------------------------------------------------------------------------------------------------------------------------------------------------------------------------------------------------------------------------------------|------------------------------------------------------------------------------------------------------------------------------------------------------------------------------------------------------------------------------------------------------------------------------------------------------------------------------------------------------------------------------------------------------------------------------------------------------------------------------------------------------------------------------------------------------------------------------------------------------------------------------------------------------------------------------------------------------------------------------------------------------------------------------------------------------------------------------------------------------|-----------------------------------------------------------------------------------------------------------------------------------------------------------------------------------------------------------------------------------------------------------------------------------------------------------------------------------------------------------------------------------------------------------------------------------------------------------------------------------------------------------------------------------------------------------------------------------------------------------------------------------------------------------------------------------------------------------------------------------------------------------------------------------------------------------------------------------------------------------------------------------------------------------------------------------------------------------------------------------------------------------------|-----------------------------------------------------------------------------------------------------------------------------------------------------------------------------------------------------------------------------------------------------------------------------------------------------------------------------------------------------------------------------------------------------------------------------------------------------------------------------------------------------------------------------------------------------------------------------------------------------------------------------------------------------|-------------------------------------------------------------------------------------------------------------------------------------------------------------------------------------------------------------------------------------------------------------------------------------------------------------------------------------------------------------------------------------------------------------------------------------------------------------------------------------------------------------------------------------------------------------------------------------------------------------------------------------------------------------------------------------------------------------------------------------------------------------------------------------------------------------------------------------------------------------------------------------------------------------------------------------------------------------------------------------------|
| <p>'iisrayiyl bial'amn aldhy yushakil hajisaha alrayiysi)</p> <p>ولذلك، فإن على إسرائيل الاختيار بين: العيش في دوامة حرب دائمة</p> <p>(wldhik, fa'iin ealaa 'iisrayiyl alaikhtiar byn: aleaysh fi dawwamat harb dayima)</p> <p>الأثار التي خلفها العدوان الإسرائيلي على هذا البلد الشقيق</p> <p>(alathar alty khllfha aleudwan al'iisrayiylu ealaa hadha albalad alshaqiq)</p> <p>مواصلة المطالبة بانضمام إسرائيل لاتفاقية منع انتشار الأسلحة النووية</p> <p>(muasalat almutalabat biaindimam 'iisrayiyl laitifaqiat mane aintishar al'aslihat alnawa)</p> <p>الصراع العربي الإسرائيلي،</p> <p>(alsirae alearabiu al'iisrayiylu)</p> <p>والرأي العام الإسرائيلي</p> <p>(walraay aleamu al'iisrayiylu)</p> <p>والضغط على إسرائيل، للقبول بهذه المبادرة</p> <p>(waldaght ealaa 'iisrayiyl, lilqubul bihadhih alhubadara)</p> <p>أي حل للصراع العربي الإسرائيلي، لابد أن يضمن إقامة الدولة الفلسطينية المستقلة</p> <p>('ay halin lilsirae alearabii al'iisrayiyl, labda 'an yadman</p> | <p>(al'iirhab aldhy aiktawat alshueub alearabiat binarih)</p> <p>والانجازات المتميزة لمجلس وزراء الداخلية العرب في مجال مكافحة الجريمة</p> <p>(walainjazat almutamayizat limajlis wuzara' alddakhiliat alearab fi majal mukafahat aljarima)</p> <p>المستويين العربي والاقليمي</p> <p>(almustawayayn alearabiu walaqlimi)</p> <p>المملكة العربية السعودية</p> <p>(almamlakat alearabiat alsaeudia)</p> <p>لمجلس وزراء الداخلية العرب</p> <p>(limajlis wuzara' alddakhiliat alearab)</p> <p>وزراء الداخلية العرب</p> <p>(wuzara' alddakhiliat alearab)</p> <p>وضع الية عربية موحدة لدراسة اساليب المنظمات الارهابية</p> <p>(wade aliat earabiat muahadat lidirasat 'asalib almunazamat al'iirhabia)</p> <p>ولا بد ان تتضمن تلك الالية العربية الموحدة اطرا شاملة</p> <p>(wala bd 'an tatadaman tilk alaliat alearabiat almuahadat atra shamilatan)</p> | <p>lil'ashiqqa' alearab swa' fi filastin 'aw fi aleiraq )</p> <p>وفي مقدمتها القضية الفلسطينية</p> <p>(wafi muqadamtiha alqidyat alfilastinia )</p> <p>الأشقاء الفلسطينيين</p> <p>(al'ashiqqa' alfilastiniiny )</p> <p>تقديم كل أشكال الدعم والمساعدة للأشقاء الفلسطينيين</p> <p>(taqdim kl 'ashkal aldaem walmusaeadat lil'ashiqqa' alfilastiniiny )</p> <p>، حتى يصلوا إلى حقوقهم وتقوم الدولة الفلسطينية المستقلة على الأرض الفلسطين</p> <p>(, hataa yasiluu 'iilaa huquqihim wataqum aldawlat alfilastiniat almustaqilat ealaa al'ard alfilastin )</p> <p>هناك من يعتقد أن من الممكن تسوية القضية الفلسطينية على حساب الأردن</p> <p>(hnak man yaetaqid 'ana min almmkn taswiat alqadiat alfilastiniat ealaa hisab al'urdun )</p> <p>الأردن لن يكون وطناً بديلاً وأن وطن الفلسطينيين ودولتهم يجب أن تكون على الأرض الفلسطينية، وليس في أي مكان آخ</p> <p>(al'urdunu ln yakun wtnaan bdylan wa'ana watan alfilastiniiny wadawlatahum yjb 'an takun ealaa al'ard alfilastiniati, walays fi 'ayi mkan akh )</p> | <p>hadhih al'aemal al'iirhabia)</p> <p>دين الاعتدال والتسامح ومحاربة الارهابيين</p> <p>(din alaietidal waltasamuh muharabat al'iirhabiiny)</p> <p>دورنا بحاربة الارهاب بكل اشكاله</p> <p>(dawrana bimuharabat al'iirhab bikuli 'ashkalih)</p> <p>واذا نجح الارهابيون في تنفيذ عملية هنا وهناك، فقد احبطنا في السابق العديد من محاولات ومخططات الإرهابين التي استهدفت هذا البلد</p> <p>(wa'iidha najah alarhabywn fi tanfidh eamaliat huna wahunak, faqad ahbtna fi alsسابiq aledyd min muhawalat wamukhatat at al'iirhabayn alty aistahdafat hdha albalad)</p> <p>التصدي لهذه المجموعات الإرهابية الجبانة</p> <p>(altasadiy lihadhih almajmueat</p> | <p>'islamyt fi tashwih surat al'islam walmuslimin)</p> <p>تبادل تُهم التكفير وقتل المسلمين ،باسم الإسلام</p> <p>(tabadul tuhm alttkfyr waqutil almuslimin biaism al'islam,)</p> <p>كلها أمور مخالفة لجوهر الإسلام، والإسلام منها بريء</p> <p>(klilha 'umur mukhalafatan lijawhar al'islam, wal'iislam minha bari')</p> <p>الحملات الظَّالمة، التي يتعرَّض لها الإسلام.</p> <p>(alhamalat alzzalmt, alty yterrd laha al'iislam.)</p> <p>لأتباع المذاهب الإسلامية الثمانية</p> <p>(li'atbae almadhahib al'islamyt alththmany)</p> <p>لأن أتباع المذاهب الثمانية متفقون على المبادئ الأساسية للإسلام</p> <p>(lan 'atbae almadhahib alththmany mttfqwn ealaa almadbadi alasasyt lil'iislam)</p> <p>وكلُّهم متفقون على أركان الإسلام الخمسة</p> <p>(wklilhm mttfqwn ealaa 'arkan al'islam alkhms)</p> <p>وقد تضمَّنت فتاوى كبار علماء الأمة الإسلامية صحَّة التعيُّد بأي من المذاهب الإسلامية الثمانية</p> <p>(waqad tdmmt fatawaa kibar eulama' alammt al'islamyt shht altebbd bi'ayi min</p> |
|-------------------------------------------------------------------------------------------------------------------------------------------------------------------------------------------------------------------------------------------------------------------------------------------------------------------------------------------------------------------------------------------------------------------------------------------------------------------------------------------------------------------------------------------------------------------------------------------------------------------------------------------------------------------------------------------------------------------------------------------------------------------------------------------------------------------------------------------------------------------------------------------------------------------------------------------------------------------------------------|------------------------------------------------------------------------------------------------------------------------------------------------------------------------------------------------------------------------------------------------------------------------------------------------------------------------------------------------------------------------------------------------------------------------------------------------------------------------------------------------------------------------------------------------------------------------------------------------------------------------------------------------------------------------------------------------------------------------------------------------------------------------------------------------------------------------------------------------------|-----------------------------------------------------------------------------------------------------------------------------------------------------------------------------------------------------------------------------------------------------------------------------------------------------------------------------------------------------------------------------------------------------------------------------------------------------------------------------------------------------------------------------------------------------------------------------------------------------------------------------------------------------------------------------------------------------------------------------------------------------------------------------------------------------------------------------------------------------------------------------------------------------------------------------------------------------------------------------------------------------------------|-----------------------------------------------------------------------------------------------------------------------------------------------------------------------------------------------------------------------------------------------------------------------------------------------------------------------------------------------------------------------------------------------------------------------------------------------------------------------------------------------------------------------------------------------------------------------------------------------------------------------------------------------------|-------------------------------------------------------------------------------------------------------------------------------------------------------------------------------------------------------------------------------------------------------------------------------------------------------------------------------------------------------------------------------------------------------------------------------------------------------------------------------------------------------------------------------------------------------------------------------------------------------------------------------------------------------------------------------------------------------------------------------------------------------------------------------------------------------------------------------------------------------------------------------------------------------------------------------------------------------------------------------------------|

|                                                                                                                                                                                                                                                                                                                                                                                                                                                                                                                                                                                                                                                                                                                                                                                                                                                                                                                                                                                                                                                                             |                                                                                                                                                                                                                                                                                                                                                                                                                                                                                                                                                                                                                                                                                                                                                                                                                                                                                                                                                                                                                                                      |                                                                                                                                                                                                                                                                                                                                                                                                                                                                                                                                                                                                                                                                                                                                                                                                                                                                                                                                                                                                                                                                                          |                                                                                                                                                                                                                                                                                                                                                                                                                                                                                                                                                                                                                                                                                                                                                          |                                                                                                                                                                                                                                                                                                                                                                                                                                                                                                                                                                                                                                                                                                                                                                                                                                                                                                                                                                                                                                                                                            |
|-----------------------------------------------------------------------------------------------------------------------------------------------------------------------------------------------------------------------------------------------------------------------------------------------------------------------------------------------------------------------------------------------------------------------------------------------------------------------------------------------------------------------------------------------------------------------------------------------------------------------------------------------------------------------------------------------------------------------------------------------------------------------------------------------------------------------------------------------------------------------------------------------------------------------------------------------------------------------------------------------------------------------------------------------------------------------------|------------------------------------------------------------------------------------------------------------------------------------------------------------------------------------------------------------------------------------------------------------------------------------------------------------------------------------------------------------------------------------------------------------------------------------------------------------------------------------------------------------------------------------------------------------------------------------------------------------------------------------------------------------------------------------------------------------------------------------------------------------------------------------------------------------------------------------------------------------------------------------------------------------------------------------------------------------------------------------------------------------------------------------------------------|------------------------------------------------------------------------------------------------------------------------------------------------------------------------------------------------------------------------------------------------------------------------------------------------------------------------------------------------------------------------------------------------------------------------------------------------------------------------------------------------------------------------------------------------------------------------------------------------------------------------------------------------------------------------------------------------------------------------------------------------------------------------------------------------------------------------------------------------------------------------------------------------------------------------------------------------------------------------------------------------------------------------------------------------------------------------------------------|----------------------------------------------------------------------------------------------------------------------------------------------------------------------------------------------------------------------------------------------------------------------------------------------------------------------------------------------------------------------------------------------------------------------------------------------------------------------------------------------------------------------------------------------------------------------------------------------------------------------------------------------------------------------------------------------------------------------------------------------------------|--------------------------------------------------------------------------------------------------------------------------------------------------------------------------------------------------------------------------------------------------------------------------------------------------------------------------------------------------------------------------------------------------------------------------------------------------------------------------------------------------------------------------------------------------------------------------------------------------------------------------------------------------------------------------------------------------------------------------------------------------------------------------------------------------------------------------------------------------------------------------------------------------------------------------------------------------------------------------------------------------------------------------------------------------------------------------------------------|
| <p>'iiqamat aldawlat<br/>alfilastiniat<br/>almustaqila)</p> <p>انسحاب إسرائيل من جميع<br/>الأراضي العربية المحتلة منذ<br/>عام 1967</p> <p>(ainsihab 'iisrayiyl<br/>min jmye al'aradi<br/>alearabiat<br/>almuhtalat mundh<br/>eam 1967)</p> <p>لتسوية الصراع العربي<br/>الإسرائيلي</p> <p>(litaswiat alsirae<br/>alearabii<br/>al'iisrayiyl)</p> <p>توجيه رسالة واضحة إلى العالم<br/>وإلى إسرائيل، تؤكد أن الأمن<br/>الإسرائيلي، مرتبط بتحقيق<br/>السلام بينها وبين الدول العربية،</p> <p>(tawjih risalat<br/>wadihat 'iilaa<br/>alealam wa'iilaa<br/>'iisrayiyla, tuakid<br/>'ana al'amn<br/>al'iisrayiylia, mrtbt<br/>bitahqiq alsalam<br/>baynaha wabayn<br/>alduwal alearabia)</p> <p>وهو أمر لا يمكن الوصول إليه،<br/>إلا إذا قبلت إسرائيل بالمبادرة<br/>العربية، والتزمت بما جاء فيها</p> <p>(wahu 'amr la<br/>ymkn alwusul<br/>'iilayhi, 'illa 'iidha<br/>qablat 'iisrayiyl<br/>bialmubadarat<br/>alearabiati,<br/>waitazamat bima<br/>ja' fiha)</p> <p>وخدمة المخططات الإسرائيلية،<br/>لتكريس انفصال غزة جغرافيا<br/>وسياسيا عن الضفة الغربية.</p> <p>(wakhidmat</p> | <p>العمل العربي الامني المشترك<br/>(aleamal<br/>alearabiu al'amnii<br/>almushtarak)</p> <p>المملكة العربية السعودية الشقيقة</p> <p>(almamlakat<br/>alearabiat<br/>alsaeudiat<br/>alshaqiqa)</p> <p>رسالة الثورة العربية<br/>(risalat althawrat<br/>alearabia)</p> <p>الأردن العربي المسلم، المنتمي<br/>لأمنته العربية والإسلامية</p> <p>(al'urdunu<br/>alearabiu<br/>almuslimu,<br/>almuntami<br/>la'umatih<br/>alearabiat<br/>wal'iislamia)</p> <p>القضايا العربية والإسلامية</p> <p>(alqadaya<br/>alearabiat<br/>wal'iislamia)</p> <p>بأمتنا العربية أو الإسلامية،</p> <p>(bi'amtana<br/>alearabiat 'aw<br/>al'iislamyat)</p> <p>الثورة العربية<br/>(althawrat<br/>alearabia)</p> <p>تقديم الدعم والمساعدة للأشقاء<br/>العرب سواء في فلسطين أو في<br/>العراق أو في أي بلد عربي آخر</p> <p>(taqdim aldaem<br/>walmusaeadat<br/>lil'ashiqqa'<br/>alearab swa' fi<br/>filastin 'aw fi<br/>aleiraq 'aw fi ayi<br/>balad earabiin<br/>akhar)</p> <p>وقد كان الأردن وسبقني مونا<br/>لكل العرب الأحرار</p> <p>(waqad kan<br/>al'urdunu<br/>wasayabqaa</p> | <p>الشعبين الشقيقين الأردني والفلسطيني.</p> <p>(alshaebayn alshaqiqayn<br/>al'urduniyu walfilastini.<br/>)</p> <p>العلاقة الأردنية الفلسطينية علاقه تاريخية<br/>مقدسة،</p> <p>(alealaqat al'urduniyat<br/>alfilastiniat eilaqah<br/>tarikhiatan muqadasatin,<br/>)</p> <p>للشعب الفلسطيني</p> <p>(lilshaeb alfilastinii<br/>)</p> <p>حتى تقوم الدولة الفلسطينية وعلى الأرض<br/>الفلسطينية</p> <p>(hataa taqum aldawlat<br/>alflstyny waealaa al'ard<br/>alfilastinia<br/>)</p> <p>أشقاءنا في فلسطين</p> <p>('ashiqqa'ana fi filastin<br/>)</p> <p>للأشقاء في فلسطين والعراق ولبنان</p> <p>(lil'ashiqqa' fi filastin<br/>waleiraq walubnan<br/>)</p> <p>فالقضية الفلسطينية وهي قضية العرب<br/>المحورية الأولى والسبب الرئيس للصراع في<br/>هذه المنطقة</p> <p>(falqadiat alfilastiniat wahi<br/>qadiat alearab<br/>almihwariat al'uwlaa<br/>walsabab alrayiys liisirae<br/>fi hadhih almintaqa<br/>)</p> <p>والشعب الفلسطيني الشقيق ما زال يبرز تحت<br/>الاحتلال</p> <p>(walshaeb alfilastiniu<br/>alshaqiq ma zal yarzah<br/>taht alaihtilal)</p> <p>إقامة الدولة الفلسطينية المستقلة</p> | <p>al'iirhabiat<br/>aljabana<br/>)</p> <p>أقوى من كل عناصر<br/>الشر والإرهاب.</p> <p>('aqwaa min<br/>kuli eanasir<br/>alshari<br/>wal'iirhab.<br/>)</p> <p>التصدي للجريمة بكافة<br/>اشكالها وصورها وفي<br/>مقدمتها الارهاب</p> <p>(altasadiy<br/>liljarimat<br/>bkaft<br/>ashkalha<br/>wusuriha<br/>wafi<br/>muqadimatih<br/>a al'iirhab<br/>)</p> <p>الانضمام الى الصكوك<br/>الدولية لمكافحة<br/>الارهاب</p> <p>(alaindimam<br/>'iilaa alsukuk<br/>alduwaliat<br/>limukafahat<br/>al'iirhab<br/>)</p> <p>لاعداد اتفاقية دولية<br/>لمكافحة الارهاب</p> <p>(laiedad<br/>aitifaqiatan<br/>dualiat<br/>limukafahat<br/>al'iirhab<br/>)</p> <p>لدراسة اساليب<br/>المنظمات الارهابية<br/>وطرقها في نشر<br/>الافكار المتطرفة</p> <p>(lidirasat<br/>'asalib</p> | <p>almadhahib<br/>al'islamyt<br/>alththmany.)</p> <p>وإغلاق الباب أمام الجاهلين الذين<br/>يمارسون أعمال القتل والإرهاب<br/>باسم الإسلام، والإسلام منها<br/>بريء.</p> <p>(wa'iighlaq albab<br/>'amam aljahilin<br/>aldhyn yumarisun<br/>'aemal alqatl<br/>wal'iirhab biaism<br/>al'iislami,<br/>wal'iislam minha<br/>bari').)</p> <p>أن تقدم الإسلام بصورته الحقيقية<br/>المشرقة.</p> <p>(an nuqadim<br/>al'islam bisuratih<br/>alhgyqyt<br/>almushriqat.)</p> <p>فالإسلام دين الوسطية والاعتدال<br/>والتسامح والرحمة</p> <p>(fal'iislam din<br/>alwstyt walaietidal<br/>waltsamh<br/>walrrhmt,)</p> <p>وقد قَدَمَ الإسلام أحسن الأحكام في<br/>حماية حقوق الإنسان</p> <p>(waqad qddm<br/>al'islam 'ahsan<br/>al'ahkam fi<br/>himayat huquq<br/>al'iinsan)</p> <p>وإنَّ الإسلام الذي يرفض<br/>التعصُّب والانغلاق يدعونا إلى<br/>العلم والمعرفة</p> <p>(w'in al'islam aldhya<br/>yarfud alttessb<br/>walainghilaq<br/>yadeuna 'iilaa<br/>aleilm walmuerifa)</p> <p>جوهر الاسلام دين الاعتدال<br/>والتسامح ومحاربة الارهابيين<br/>الذين يقتلون الابرياء باسم الاسلام<br/>والاسلام منهم بري</p> |
|-----------------------------------------------------------------------------------------------------------------------------------------------------------------------------------------------------------------------------------------------------------------------------------------------------------------------------------------------------------------------------------------------------------------------------------------------------------------------------------------------------------------------------------------------------------------------------------------------------------------------------------------------------------------------------------------------------------------------------------------------------------------------------------------------------------------------------------------------------------------------------------------------------------------------------------------------------------------------------------------------------------------------------------------------------------------------------|------------------------------------------------------------------------------------------------------------------------------------------------------------------------------------------------------------------------------------------------------------------------------------------------------------------------------------------------------------------------------------------------------------------------------------------------------------------------------------------------------------------------------------------------------------------------------------------------------------------------------------------------------------------------------------------------------------------------------------------------------------------------------------------------------------------------------------------------------------------------------------------------------------------------------------------------------------------------------------------------------------------------------------------------------|------------------------------------------------------------------------------------------------------------------------------------------------------------------------------------------------------------------------------------------------------------------------------------------------------------------------------------------------------------------------------------------------------------------------------------------------------------------------------------------------------------------------------------------------------------------------------------------------------------------------------------------------------------------------------------------------------------------------------------------------------------------------------------------------------------------------------------------------------------------------------------------------------------------------------------------------------------------------------------------------------------------------------------------------------------------------------------------|----------------------------------------------------------------------------------------------------------------------------------------------------------------------------------------------------------------------------------------------------------------------------------------------------------------------------------------------------------------------------------------------------------------------------------------------------------------------------------------------------------------------------------------------------------------------------------------------------------------------------------------------------------------------------------------------------------------------------------------------------------|--------------------------------------------------------------------------------------------------------------------------------------------------------------------------------------------------------------------------------------------------------------------------------------------------------------------------------------------------------------------------------------------------------------------------------------------------------------------------------------------------------------------------------------------------------------------------------------------------------------------------------------------------------------------------------------------------------------------------------------------------------------------------------------------------------------------------------------------------------------------------------------------------------------------------------------------------------------------------------------------------------------------------------------------------------------------------------------------|

|                                                                                                                                                                                                                                                                                                                                       |                                                                                                                                                                                                                                                                                                                                                                                                                                                                                                                                                                                                                                                                                                                                                                                                                                                                                                                                                                                   |                                                                                                                                                                                                                                                                                                                                                                                                                                                                                                                                                                                                                                                                                                                                                                                                                                                                                                                                                                                                                                                                                                                                 |                                                                                                                                                                                                                                                                                                                                                                                                                                                                                                                                                                                                                                                                                                                                                                                         |                                                                                                                                                                                                                                                                                                                                                                                                                                                                                                                                                                                                                                                                                                                                                                                                                                                                                                                                                                           |
|---------------------------------------------------------------------------------------------------------------------------------------------------------------------------------------------------------------------------------------------------------------------------------------------------------------------------------------|-----------------------------------------------------------------------------------------------------------------------------------------------------------------------------------------------------------------------------------------------------------------------------------------------------------------------------------------------------------------------------------------------------------------------------------------------------------------------------------------------------------------------------------------------------------------------------------------------------------------------------------------------------------------------------------------------------------------------------------------------------------------------------------------------------------------------------------------------------------------------------------------------------------------------------------------------------------------------------------|---------------------------------------------------------------------------------------------------------------------------------------------------------------------------------------------------------------------------------------------------------------------------------------------------------------------------------------------------------------------------------------------------------------------------------------------------------------------------------------------------------------------------------------------------------------------------------------------------------------------------------------------------------------------------------------------------------------------------------------------------------------------------------------------------------------------------------------------------------------------------------------------------------------------------------------------------------------------------------------------------------------------------------------------------------------------------------------------------------------------------------|-----------------------------------------------------------------------------------------------------------------------------------------------------------------------------------------------------------------------------------------------------------------------------------------------------------------------------------------------------------------------------------------------------------------------------------------------------------------------------------------------------------------------------------------------------------------------------------------------------------------------------------------------------------------------------------------------------------------------------------------------------------------------------------------|---------------------------------------------------------------------------------------------------------------------------------------------------------------------------------------------------------------------------------------------------------------------------------------------------------------------------------------------------------------------------------------------------------------------------------------------------------------------------------------------------------------------------------------------------------------------------------------------------------------------------------------------------------------------------------------------------------------------------------------------------------------------------------------------------------------------------------------------------------------------------------------------------------------------------------------------------------------------------|
| <p>almukhatatat<br/>al'iisrayiylat,<br/>litakris ainfisal<br/>ghazat<br/>jughrafiaan<br/>wasiasiaan ean<br/>aldifat algharbiati)</p> <p>الضغط على إسرائيل، لوقف<br/>سياسات العدوان والحصار<br/>والإغلاق والاستيطان</p> <p>(aldaght ealaa<br/>'iisrayiyl, liwaqf<br/>siasat aleudwan<br/>walhisar<br/>wal'iighlaq<br/>walaistitan)</p> | <p>mawyilanaan likuli<br/>alearab al'ahrar)</p> <p>تقديم الدعم والإسناد للأشقاء<br/>العرب والقضايا العربية وفي<br/>مقدماتها القضية الفلسطينية<br/>وقضية الشعب العراقي.</p> <p>(taqdim aldaem<br/>wal'iisnad<br/>lil'ashiqaa'<br/>alearab<br/>walqadaya<br/>alearbiyat wafi<br/>muqadamatiha<br/>alqadayat<br/>alfilastiniat<br/>waqadiat alshaeb<br/>aleiraqi)</p> <p>الجيش العربي<br/>(aljish alearabiu)</p> <p>أمجاد العرب والمسلمين<br/>(amjad alearab<br/>walmuslimin)</p> <p>الجيش العربي<br/>(aljish alearabiu)</p> <p>الثورة العربية<br/>(althawrat<br/>alearabia)</p> <p>الدفاع عن الأرض العربية<br/>(aldifae ean al'ard<br/>alearabia)</p> <p>وإذا كان الأردن يفتح أبوابه لكل<br/>الأشقاء العرب<br/>(wa'iidha kan<br/>al'urdunu yaftah<br/>'abwabah likuli<br/>al'ashiqqa' aleara)</p> <p>ويحرص على أن يكون الملاذ<br/>لكل عربي مظلوم<br/>(wayahris ealaa<br/>'an yakun almladh<br/>likulin earabiin<br/>mazlum)</p> <p>البلدان العربية<br/>(albuldan<br/>alearabia)</p> | <p>(i'iqamat aldawlat<br/>alfilastiniat almustaqila<br/>)</p> <p>بدعم وحدة الشعب الفلسطيني وقيادته<br/>(bidaem wahdat alshaeb<br/>alfilastinii waqiadatih<br/>)</p> <p>ضمان قيام الدولة الفلسطينية المستقلة وعلى<br/>أساس المبادرة العربية.</p> <p>(daman qiam aldawlat<br/>alfilastiniat almustaqilat<br/>waealaa 'asas<br/>almubadarat alearabiati.<br/>)</p> <p>إقامة دولة فلسطينية مستقلة قابلة للحياة<br/>ومتواصلة جغرافياً،</p> <p>(i'iqamat dawlat filastiniat<br/>mustaqilat qabilat lilhayat<br/>wamutawasilat<br/>jughrafiaan,<br/>)</p> <p>للوصول إلى إقامة الدولة الفلسطينية على<br/>التراب الفلسطيني.</p> <p>(lilwusul 'iilaa 'i'iqamat<br/>aldawlat alfilastiniat ealaa<br/>alturab alfilastini.<br/>)</p> <p>إقامة الدولة الفلسطينية</p> <p>(i'iqamat aldawlat<br/>alfilastinia<br/>)</p> <p>وقد كانت القضية الفلسطينية على مدى<br/>تاريخها قضيتنا القومية الأولى.</p> <p>(waqad kanat alqdyt<br/>alfilastiniat ealaa madaa<br/>tarikhiha qadiatuna<br/>alqawmiat al'uwlaa.<br/>)</p> <p>ضرورة إيجاد حلٍّ عادلٍ ودائمٍ للقضية<br/>الفلسطينية</p> <p>(darurat 'iijad hl eadil<br/>wadayim llqdyt alfilastinia</p> | <p>almunazama<br/>t al'iirhabiat<br/>watarqiha fi<br/>nashr<br/>al'afkar<br/>almutatarifa<br/>)</p> <p>وبناء ثقافة مجتمعية<br/>تنبذ الفكر الارهابي</p> <p>(wabina'<br/>thaqafat<br/>mujtamaeiat<br/>tunbidh alfikr<br/>al'iirhabia<br/>)</p> <p>لننذ العنف بكافة<br/>اشكاله وصورة وقمع<br/>الارهاب ودوافعه<br/>وتجفيف منابعه</p> <p>(lanubidh<br/>aleunf bkaft<br/>'ashkalih<br/>wasurat<br/>waqame<br/>al'iirhab<br/>wadawafieih<br/>watajiff<br/>manabieih<br/>)</p> <p>التصدي للارهاب<br/>مسؤولية جماعية<br/>مشتركة</p> <p>(altasadiy<br/>lil'iirhab<br/>maswuwliat<br/>jamaeiat<br/>mushtaraka<br/>)</p> <p>لوقاية الابناء من<br/>السلوك الارهابي</p> <p>(lawiqayat<br/>alaibna' min<br/>alsuluk<br/>al'iirhabii<br/>)</p> <p>وكذلك التتديد بما تنبى<br/>عليه الاعمال الارهابية</p> | <p>(jawhar alaslām<br/>din alaietidal<br/>waltasamuh<br/>wamuharabat<br/>al'iirhabiiyn<br/>aladhin yaqtulun<br/>al'abria' biaism<br/>alaslām walaslām<br/>minhum bry)</p> <p>فهم خاطيء لمبادئ الشريعة<br/>الإسلامية السمحة واحكامها</p> <p>(fahum khati'<br/>limubadi' alshryet<br/>al'iislamiat<br/>alsamhat<br/>waihkamiha<br/>)</p> <p>والتركيز على براءة الإسلام من<br/>هذه الافكار كونه دين التسامح<br/>والسلام</p> <p>(waltarkiz ealaa<br/>bara'at alaslām<br/>min hadhih<br/>al'afkar kawnuh<br/>din altasamuh<br/>walsalam<br/>)</p> <p>جوهر الإسلام الذي يجمع ولا<br/>يفرق ويدعو إلى وحدة المسلمين</p> <p>(jawhar al'islam<br/>aldhy yajmae wala<br/>yufraq wayadeu<br/>'iilaa wahdat<br/>almuslimin<br/>)</p> <p>لمنظمة المؤتمر الإسلامي<br/>(limunazamat<br/>almutamar<br/>al'iislamii<br/>)</p> <p>يتفقوا فيما بينهم على صحة<br/>إسلام أتباع كل مذهب منهم</p> <p>(ytfqu fima<br/>baynahum ealaa<br/>sihat 'iislam 'atbae<br/>kli madhhib<br/>minhum<br/>)</p> |
|---------------------------------------------------------------------------------------------------------------------------------------------------------------------------------------------------------------------------------------------------------------------------------------------------------------------------------------|-----------------------------------------------------------------------------------------------------------------------------------------------------------------------------------------------------------------------------------------------------------------------------------------------------------------------------------------------------------------------------------------------------------------------------------------------------------------------------------------------------------------------------------------------------------------------------------------------------------------------------------------------------------------------------------------------------------------------------------------------------------------------------------------------------------------------------------------------------------------------------------------------------------------------------------------------------------------------------------|---------------------------------------------------------------------------------------------------------------------------------------------------------------------------------------------------------------------------------------------------------------------------------------------------------------------------------------------------------------------------------------------------------------------------------------------------------------------------------------------------------------------------------------------------------------------------------------------------------------------------------------------------------------------------------------------------------------------------------------------------------------------------------------------------------------------------------------------------------------------------------------------------------------------------------------------------------------------------------------------------------------------------------------------------------------------------------------------------------------------------------|-----------------------------------------------------------------------------------------------------------------------------------------------------------------------------------------------------------------------------------------------------------------------------------------------------------------------------------------------------------------------------------------------------------------------------------------------------------------------------------------------------------------------------------------------------------------------------------------------------------------------------------------------------------------------------------------------------------------------------------------------------------------------------------------|---------------------------------------------------------------------------------------------------------------------------------------------------------------------------------------------------------------------------------------------------------------------------------------------------------------------------------------------------------------------------------------------------------------------------------------------------------------------------------------------------------------------------------------------------------------------------------------------------------------------------------------------------------------------------------------------------------------------------------------------------------------------------------------------------------------------------------------------------------------------------------------------------------------------------------------------------------------------------|

|  |                                                                                                                                                                                                                                                                                                                                                                                                                                                                                                                                                                                                                                                                                                                                                                                                                           |                                                                                                                                                                                                                                                                                                                                                                                                                                                                                                                                                                                                                                                                                                                                                                                                                                                                                                                                                                                                                                                   |                                                                                                                                                                                                                                                                                                                                                                                                                                                                                                                                                                                                              |                                                                                                                                                                                                                                                                                                                                                                                                                                                                                                                                                                                                                                                                                                                  |  |
|--|---------------------------------------------------------------------------------------------------------------------------------------------------------------------------------------------------------------------------------------------------------------------------------------------------------------------------------------------------------------------------------------------------------------------------------------------------------------------------------------------------------------------------------------------------------------------------------------------------------------------------------------------------------------------------------------------------------------------------------------------------------------------------------------------------------------------------|---------------------------------------------------------------------------------------------------------------------------------------------------------------------------------------------------------------------------------------------------------------------------------------------------------------------------------------------------------------------------------------------------------------------------------------------------------------------------------------------------------------------------------------------------------------------------------------------------------------------------------------------------------------------------------------------------------------------------------------------------------------------------------------------------------------------------------------------------------------------------------------------------------------------------------------------------------------------------------------------------------------------------------------------------|--------------------------------------------------------------------------------------------------------------------------------------------------------------------------------------------------------------------------------------------------------------------------------------------------------------------------------------------------------------------------------------------------------------------------------------------------------------------------------------------------------------------------------------------------------------------------------------------------------------|------------------------------------------------------------------------------------------------------------------------------------------------------------------------------------------------------------------------------------------------------------------------------------------------------------------------------------------------------------------------------------------------------------------------------------------------------------------------------------------------------------------------------------------------------------------------------------------------------------------------------------------------------------------------------------------------------------------|--|
|  | <p>العالم العربي.<br/>(alealam alearabi)</p> <p>توحيد الموقف العربي<br/>(tawhid almawqif alearabii)</p> <p>حتى لا يتم تهيمش الدور العربي في المنطقة،<br/>(hataa la yatimu tahmish aldawr alearabii fi almintaqat)</p> <p>وأشقائنا العرب<br/>(wa'ashqayuna alearab)</p> <p>القيادات العربية الشابة<br/>(alqiadat alearabiat alshshaba)</p> <p>القيادات الشابة العربية<br/>(alqiadat alshshabat alearabia)</p> <p>المجتمعات العربية<br/>(almujtamaeat alearabia)</p> <p>ستعزز دور الشباب العربي<br/>(satueazaz dawr alshshbab alearabi)</p> <p>القيادات الشابة العربية<br/>(alqiadat alshshabat alearabia)</p> <p>الشباب العربي<br/>(alshhabab alearabiu)</p> <p>الصعيد العربي أو العالمي<br/>(alsaeyd alearabiu 'aw alealamiu)</p> <p>ملوك ورؤساء وأمراء الدول العربية<br/>(muluk waruasa' wa'umra' alduwal alearabia)</p> | <p>)</p> <p>برفع الظلم عن الفلسطينيين وتحقيق العدالة لهذا الشعب الشقيق<br/>(birafe alzulm ean alfilastiniyn watahqiq aleadalat lhdha alshaeb alshaqiq )</p> <p>فشل سياسات الحلول الأحادية أو المفروضة على الشعب الفلسطيني،<br/>(fashilu siasat alhulul al'ahadiat 'aw almafrudat ealaa alshaeb alfilastinii, )</p> <p>أحداث العنف في غزة التي يجب ان تتوقف لمصلحة الشعب الفلسطيني ولمصلحة فلسطين<br/>(ahdath aleunf fi ghazat alty yjb 'an tatawaqaf limaslahat alshaeb alfilastinii walimaslahat filastin )</p> <p>كان الأردن الرديف والسند والداعم للأشقاء الفلسطينيين<br/>(kan al'urdunu alradif walsind walddaeim lil'ashiqat alfilastiniyn )</p> <p>وتحمل في سبيل القضية الفلسطينية، ما هو فوق طاقاته وإمكانياته.<br/>(wthmml fi sabil alqadiat alfilastiniati, ma hu fawq taqatih wa'imkaniaatih. )</p> <p>للدفاع عن عروبة فلسطين،<br/>(lildifae ean eurubat filastina, )</p> <p>للدفاع عن القضية الفلسطينية.<br/>(lildifae ean alqadiat alfilastiniati. )</p> <p>للدفاع عن فلسطين<br/>(lildifae ean filastin )</p> <p>للدفاع عن فلسطين</p> | <p>من فهم خاطيء لمبادئ الشريعة الإسلامية السمحة<br/>(wakadhalak altandid bima tabanaa ealayh al'aemal al'iirhabiat min fahum khati' limabadi' alshryet al'iislatmiat alsamha )</p> <p>العصابات الارهابية التي اصبحت تشكل ادوات للهجمة الشرسة على ديننا الحنيف<br/>(aleisabat al'iirhabiat alty 'asbahat tushakil adwat lilhajmat alsharsat ealaa dinina alhanif )</p> <p>مواجهة كل أشكال العنف والإرهاب، وعلى التمسك بالإسلام الحقيقي<br/>(muajahat kl 'ashkal aleunf wal'iirhabi, waealaa altamasuk bial'iislam alhaqiqii )</p> <p>يهدف التصدي لأعمال الإرهاب<br/>(bihadaf altasadiy li'aemal al'iirhab</p> | <p>المؤتمر الإسلامي الدولي<br/>(almutamar al'iislatmiu alduwaliu )</p> <p>أتباع المذاهب الإسلامية الثمانية<br/>(atbae almadhahib al'iislatmiat althamania )</p> <p>جميع المراجع الدينية الإسلامية<br/>(jmye almarajie aldiyniat al'iislatmia )</p> <p>أركان الإسلام<br/>(arkan al'islam )</p> <p>فأصحاب المذاهب الثمانية متفقون على المبادئ الأساسية للإسلام<br/>(fa'ashab almadhahib althamaniat mutafiqun ealaa almadadi al'asasiat lil'iislam )</p> <p>وكلهم متفقون على أركان الإسلام الخمسة<br/>(wakuluhum mutafiqun ealaa 'arkan al'islam alkhms )</p> <p>لجنة الفكر الإسلامي<br/>(lajnat alfikr al'iislamii )</p> <p>وقرارات المؤتمر الإسلامي الدولي<br/>(waqararat almutamar al'iislatmiu alduwaliu )</p> |  |
|--|---------------------------------------------------------------------------------------------------------------------------------------------------------------------------------------------------------------------------------------------------------------------------------------------------------------------------------------------------------------------------------------------------------------------------------------------------------------------------------------------------------------------------------------------------------------------------------------------------------------------------------------------------------------------------------------------------------------------------------------------------------------------------------------------------------------------------|---------------------------------------------------------------------------------------------------------------------------------------------------------------------------------------------------------------------------------------------------------------------------------------------------------------------------------------------------------------------------------------------------------------------------------------------------------------------------------------------------------------------------------------------------------------------------------------------------------------------------------------------------------------------------------------------------------------------------------------------------------------------------------------------------------------------------------------------------------------------------------------------------------------------------------------------------------------------------------------------------------------------------------------------------|--------------------------------------------------------------------------------------------------------------------------------------------------------------------------------------------------------------------------------------------------------------------------------------------------------------------------------------------------------------------------------------------------------------------------------------------------------------------------------------------------------------------------------------------------------------------------------------------------------------|------------------------------------------------------------------------------------------------------------------------------------------------------------------------------------------------------------------------------------------------------------------------------------------------------------------------------------------------------------------------------------------------------------------------------------------------------------------------------------------------------------------------------------------------------------------------------------------------------------------------------------------------------------------------------------------------------------------|--|

|  |                                                                                                                                                                                                                                                                                                                                                                                                                                                                                                                                                                                                                                                                                                                                                                                                                                                                                                                                                                                                                                                                                                                                       |                                                                                                                                                                                                                                                                                                                                                                                                                                                                                                                                                                                                                                                                                                                                                                                                                                                                                                                                                                                                                                                                                                                                                                                                                                                                                                                   |                                                                                                                                                                                                                                                                                                                                                                                                                                                                                                                                                                                                                                                                                                                                                                                    |                                                                                                                                                                                                                                                                                                                                                                                                                                                                                                                                                                                                                                                                                                                                                                                                                          |  |
|--|---------------------------------------------------------------------------------------------------------------------------------------------------------------------------------------------------------------------------------------------------------------------------------------------------------------------------------------------------------------------------------------------------------------------------------------------------------------------------------------------------------------------------------------------------------------------------------------------------------------------------------------------------------------------------------------------------------------------------------------------------------------------------------------------------------------------------------------------------------------------------------------------------------------------------------------------------------------------------------------------------------------------------------------------------------------------------------------------------------------------------------------|-------------------------------------------------------------------------------------------------------------------------------------------------------------------------------------------------------------------------------------------------------------------------------------------------------------------------------------------------------------------------------------------------------------------------------------------------------------------------------------------------------------------------------------------------------------------------------------------------------------------------------------------------------------------------------------------------------------------------------------------------------------------------------------------------------------------------------------------------------------------------------------------------------------------------------------------------------------------------------------------------------------------------------------------------------------------------------------------------------------------------------------------------------------------------------------------------------------------------------------------------------------------------------------------------------------------|------------------------------------------------------------------------------------------------------------------------------------------------------------------------------------------------------------------------------------------------------------------------------------------------------------------------------------------------------------------------------------------------------------------------------------------------------------------------------------------------------------------------------------------------------------------------------------------------------------------------------------------------------------------------------------------------------------------------------------------------------------------------------------|--------------------------------------------------------------------------------------------------------------------------------------------------------------------------------------------------------------------------------------------------------------------------------------------------------------------------------------------------------------------------------------------------------------------------------------------------------------------------------------------------------------------------------------------------------------------------------------------------------------------------------------------------------------------------------------------------------------------------------------------------------------------------------------------------------------------------|--|
|  | <p>المملكة العربية السعودية</p> <p>(almamlakat<br/>alearabiat<br/>alsaeudia)</p> <p>القمة العربية التاسعة عشر</p> <p>(alqmmmt<br/>alearabiat<br/>alttasieat eshr)</p> <p>لتعزيز التضامن العربي</p> <p>(litaeziz<br/>altadamun<br/>alearabii)</p> <p>وتوحيد كلمة الأمة العربية والإسلامية،</p> <p>(watawhid kalimat<br/>alammt alerbyt<br/>wal'iislamiati,)</p> <p>للقمة العربية الثامنة عشر</p> <p>(llqmmmt alerbyt<br/>alththaminat eshr)</p> <p>، ونجدد الشكر لجامعتنا العربية</p> <p>(, wanujadid<br/>alshukr<br/>lijamieatina<br/>alearabia)</p> <p>وأمتنا العربية تمر في أخطر<br/>مراحل تاريخها المعاصر</p> <p>(wa'umatuna<br/>alearabiat tamuru<br/>fi 'akhtar marahil<br/>tarikhiha<br/>almueasir)</p> <p>فالقضية الفلسطينية وهي قضية<br/>العرب المحورية الأولى والسبب<br/>الرئيس للصراع في هذه المنطقة</p> <p>(falqadiat<br/>afilastiniat wahi<br/>qadiat alearab<br/>almihwariat<br/>al'uwilaa walsabab<br/>alrayiys liisirae fi<br/>hadhih almintaqa)</p> <p>لاستعادة الحقوق العربية وإقامة<br/>الدولة الفلسطينية المستقلة</p> <p>(liaistieadat<br/>alhuquq<br/>alearabiat<br/>wa'iiqamat<br/>aldawlat<br/>afilastiniat</p> | <p>lildifae ean filastin</p> <p>القضية الفلسطينية،</p> <p>(alqadiat alfilastiniat,<br/>)</p> <p>الأردن سيستمر في الدفاع عن الحق العربي<br/>في فلسطين،</p> <p>(al'urdunu sayastamiru fy<br/>aldifae ean alhaqi<br/>alearabii fi filastina,<br/>)</p> <p>حتى يستعيد الشعب الفلسطيني، كامل حقوقه<br/>ويقيم دولته المستقلة على أرضه،</p> <p>(hataa yastaeid alshaeb<br/>afilastiniu, kamil huquqih<br/>wayuqim dawlatih<br/>almustaqilat ealaa 'ardihi,<br/>)</p> <p>لاسترجاع الحقوق الفلسطينية والعربية</p> <p>(liaistirjae alhuquq<br/>afilastiniat walearabia<br/>)</p> <p>، وإقامة الدولة الفلسطينية المستقلة</p> <p>(, wa'iiqamat aldawlat<br/>afilastiniat almustaqila<br/>)</p> <p>والاستفادة من تعاطف العالم مع معاناة الشعب<br/>الفلسطيني</p> <p>(walaistifadat min taetatuf<br/>alealam mae mueanat<br/>alshaeb alfilastinii<br/>)</p> <p>القضية الفلسطينية،</p> <p>(alqadiat alfilastiniat,<br/>)</p> <p>وندعو العالم إلى الالتزام برفع الظلم عن<br/>الشعب الفلسطيني</p> <p>(wanadeu alealam 'iilaa<br/>alailtizam birafe alzulm<br/>ean alshaeb alfilastinii<br/>)</p> <p>فنحن لا نتحدث بالنيابة عن الفلسطينيين،<br/>ولسنا بديل عنهم</p> <p>(fnhn la natahadath<br/>bialniyabat ean<br/>afilastiniinya, waslasna<br/>badilaan eanhum)</p> <p> وإقامة دولتهم المستقلة على أرضهم وترابهم<br/>الفلسطيني.</p> | <p>)</p> <p>والتي يعتمدون عليها<br/>كمبررات في عملياتهم<br/>الإرهابية</p> <p>(walati<br/>yaetamidun<br/>ealayha<br/>kamubarirat<br/>fi<br/>eamaliatihim<br/>al'iirhabia<br/>)</p> <p>ووقف الأذى والفساد<br/>وإجباط ما استطعنا من<br/>الأعمال الإرهابية</p> <p>(wawaqf<br/>al'adhaa<br/>walfasad<br/>wa'iihbat ma<br/>aistataena<br/>min al'aemal<br/>al'iirhabia<br/>)</p> <p>والإرهاب، الذي يهدد<br/>بتدمير حاضر هذه<br/>المنطقة ومستقبلها،</p> <p>(wal'iirhaba,<br/>aldhy<br/>yuhadid<br/>bitadmir<br/>hadir hadhih<br/>almintaqat<br/>wamustaqba<br/>liha,<br/>)</p> <p>كل يوم يذهب منهم<br/>العشرات وربما المئات<br/>ضحايا للعنف<br/>والإرهاب والفتنة</p> <p>(kulu yawm<br/>yadhab<br/>minhum<br/>aleasharat<br/>warubama<br/>almiat<br/>dahaya<br/>lileunf<br/>wal'iirhab</p> | <p>)</p> <p>تكفير بعض المسلمين وقتلهم باسم<br/>الإسلام والإسلام منهم بريء</p> <p>(takfir bed<br/>almuslimin<br/>waqatlihimbaism<br/>al'islam wal'iislam<br/>minhum bari')</p> <p>مشروع الإسلام الحضاري</p> <p>(mashrue al'islam<br/>alhadarii<br/>)</p> <p>المؤتمر الإسلامي</p> <p>(almutamar<br/>al'iislamiu<br/>)</p> <p>لأمتة العربية والإسلامية</p> <p>(la'umatih<br/>alearabiat<br/>wal'iislamia<br/>)</p> <p>القضايا العربية والإسلامية</p> <p>(alqadaya<br/>alearabiat<br/>wal'iislamia<br/>)</p> <p>بأمتنا العربية أو الإسلامية،</p> <p>(bi'amtana<br/>alearabiat 'aw<br/>al'iislamiyat,<br/>)</p> <p>الدفاع عن الإسلام والعرب<br/>والمسلمين</p> <p>(aldfae en al'islam<br/>walerib<br/>walmuslimin<br/>)</p> <p>فهذه المعرفة هي التي شكلت<br/>العلامة المميزة للحضارة<br/>الإسلامية</p> <p>(fhdh almaerifat</p> |  |
|--|---------------------------------------------------------------------------------------------------------------------------------------------------------------------------------------------------------------------------------------------------------------------------------------------------------------------------------------------------------------------------------------------------------------------------------------------------------------------------------------------------------------------------------------------------------------------------------------------------------------------------------------------------------------------------------------------------------------------------------------------------------------------------------------------------------------------------------------------------------------------------------------------------------------------------------------------------------------------------------------------------------------------------------------------------------------------------------------------------------------------------------------|-------------------------------------------------------------------------------------------------------------------------------------------------------------------------------------------------------------------------------------------------------------------------------------------------------------------------------------------------------------------------------------------------------------------------------------------------------------------------------------------------------------------------------------------------------------------------------------------------------------------------------------------------------------------------------------------------------------------------------------------------------------------------------------------------------------------------------------------------------------------------------------------------------------------------------------------------------------------------------------------------------------------------------------------------------------------------------------------------------------------------------------------------------------------------------------------------------------------------------------------------------------------------------------------------------------------|------------------------------------------------------------------------------------------------------------------------------------------------------------------------------------------------------------------------------------------------------------------------------------------------------------------------------------------------------------------------------------------------------------------------------------------------------------------------------------------------------------------------------------------------------------------------------------------------------------------------------------------------------------------------------------------------------------------------------------------------------------------------------------|--------------------------------------------------------------------------------------------------------------------------------------------------------------------------------------------------------------------------------------------------------------------------------------------------------------------------------------------------------------------------------------------------------------------------------------------------------------------------------------------------------------------------------------------------------------------------------------------------------------------------------------------------------------------------------------------------------------------------------------------------------------------------------------------------------------------------|--|

|  |                                                                                                                                                                                                                                                                                                                                                                                                                                                                                                                                                                                                                                                                                                                                                                                                                                                                                                                                                                         |                                                                                                                                                                                                                                                                                                                                                                                                                                                                                                                                                                                                                                                                                                                                                                                                                                                                                                                                                                                                                                                                                                                                                                                                                                                                                                |                                                                                                                                                                                                                                                                                                                                                                                                                                                                                                                                                                                                                                                                                                                                                             |  |
|--|-------------------------------------------------------------------------------------------------------------------------------------------------------------------------------------------------------------------------------------------------------------------------------------------------------------------------------------------------------------------------------------------------------------------------------------------------------------------------------------------------------------------------------------------------------------------------------------------------------------------------------------------------------------------------------------------------------------------------------------------------------------------------------------------------------------------------------------------------------------------------------------------------------------------------------------------------------------------------|------------------------------------------------------------------------------------------------------------------------------------------------------------------------------------------------------------------------------------------------------------------------------------------------------------------------------------------------------------------------------------------------------------------------------------------------------------------------------------------------------------------------------------------------------------------------------------------------------------------------------------------------------------------------------------------------------------------------------------------------------------------------------------------------------------------------------------------------------------------------------------------------------------------------------------------------------------------------------------------------------------------------------------------------------------------------------------------------------------------------------------------------------------------------------------------------------------------------------------------------------------------------------------------------|-------------------------------------------------------------------------------------------------------------------------------------------------------------------------------------------------------------------------------------------------------------------------------------------------------------------------------------------------------------------------------------------------------------------------------------------------------------------------------------------------------------------------------------------------------------------------------------------------------------------------------------------------------------------------------------------------------------------------------------------------------------|--|
|  | <p>almustaqila)</p> <p>وفقا لقرارات الشرعية الدولية ومبادرة السلام العربية التي أطلقها خادم الحرمين الشريفين</p> <p>(wifqaan liqararat alshareiat alduwaliat wamubadarat alsalam alearabiat alty 'atlaqaha khadim alharamayn alsharifayn)</p> <p>حل عادل وشامل للصراع العربي الإسرائيلي (hala eadil washamil lilsirae alearabii al'iisrayiyl)</p> <p>ضمان قيام الدولة الفلسطينية المستقلة وعلى أساس المبادرة العربية</p> <p>(daman qiam aldawlat alfilastiniat almustaqilat waealaa 'asas almubadarat alearabia)</p> <p>لإيجاد تسوية عادلة وشاملة للصراع العربي - الإسرائيلي (li'ijad taswiat eadilat washamilat lilsirae alearabii - al'iisrayiyl)</p> <p>إلا إذا تعاملت إسرائيل مع المبادرة العربية التي تمثل المشروع العربي الجماعي للسلام بإيجابية وجدية واحترام والتزام.</p> <p>('illa 'iidha taeamalat 'iisrayiyl mae almubadarat alearabiat alty tmththl almashrue alearabia aljamaeia lilsalam bi'ijabiat wjdyt waihtiram wailtizamin)</p> <p>العالم العربي</p> | <p>(wa'iiqamat dawlatihim almustaqilat ealaa 'ardahum watarabuhum alfilastini.)</p> <p>فالقضية الفلسطينية هي قضيتنا جميعا، ومعاناة الفلسطينيين هي معاناتنا</p> <p>(falqadiat alfilastiniat hi qadiatuna jamieaan, wamueanat alfilastiniyn hi mueanatuna)</p> <p>أرض فلسطين. ('ardu filistin.)</p> <p>الجيش العربي في فلسطين (aljaysh alearabiu fi filasti)</p> <p>للدفاع عن الأرض العربية سواء في فلسطين، أو في أي مكان، من الوطن العربي الكبير. (lildifae ean al'ard alearabiat swa' fi filastin, 'aw fi 'ayi makanin, min alwatan alearabii alkabir.)</p> <p>القضية الفلسطينية، (alqudiuh alfilastiniat)</p> <p>والإعتراف بحق الشعب الفلسطيني، بإقامة دولته المستقلة على الأرض الفلسطينية، (wal'iietaraf bihaqi alshaeb alfilastini, bi'iiqamat dawlatih almustaqilat ealaa al'ard alfilastiniat)</p> <p>للقضية الفلسطينية، (lilqadiat alfilastiniat)</p> <p>مساندة ودعم أشقاءنا الفلسطينيين (musanadat wadaem 'ashiqqa'ana alfilastiniyn)</p> <p>لتمكين الأشقاء الفلسطينيين، من الوصول إلى حقوقهم، وإقامة دولتهم المستقلة، على الأرض الفلسطينية.</p> <p>(litamkin al'ashiqqa' alfilastiniyna, min alwusul 'iilaa huquqihim, wa'iiqamat dawlatihim almustaqilati, ealaa al'ard alfilastiniat)</p> <p>إن القضية الفلسطينية هي القضية الرئيسية للأمة العربية ('iina alqadiat alfilastiniat</p> | <p>walfitna )</p> <p>hi alty shakalat aleallamat almumayazat lilhadarat al'iislamia )</p> <p>سعى الأردن للترويج للمعرفة الحقيقية عن الإسلام،</p> <p>(saeaa al'urdunu liltarwij lilmaerifat alhaqiqiat ean al'islam, )</p> <p>ومعرفة الإسلام الحقيقي. (wamaerifat al'islam alhaqiqi. )</p> <p>والمؤتمر الإسلامي الدولي (walmutamam al'iislamiu alduwaliu)</p> <p>الاعتراف بصورة واضحة بجميع المذاهب الثمانية في الإسلام،</p> <p>(alaitiraf bisurat wadihat bijamie almadhahib althamaniat fi al'iislam, )</p> <p>اجتثاث التصريحات والبيانات الجاهلة غير المسؤولة التي تصدر باسم الإسلام</p> <p>(aijtithath altasrihat walbayanat aljahilat ghyr almaswuwlat alty tasdur biaism al'islam )</p> <p>منظمة المؤتمر الإسلامي (munazamat almutamar al'iislamii</p> |  |
|--|-------------------------------------------------------------------------------------------------------------------------------------------------------------------------------------------------------------------------------------------------------------------------------------------------------------------------------------------------------------------------------------------------------------------------------------------------------------------------------------------------------------------------------------------------------------------------------------------------------------------------------------------------------------------------------------------------------------------------------------------------------------------------------------------------------------------------------------------------------------------------------------------------------------------------------------------------------------------------|------------------------------------------------------------------------------------------------------------------------------------------------------------------------------------------------------------------------------------------------------------------------------------------------------------------------------------------------------------------------------------------------------------------------------------------------------------------------------------------------------------------------------------------------------------------------------------------------------------------------------------------------------------------------------------------------------------------------------------------------------------------------------------------------------------------------------------------------------------------------------------------------------------------------------------------------------------------------------------------------------------------------------------------------------------------------------------------------------------------------------------------------------------------------------------------------------------------------------------------------------------------------------------------------|-------------------------------------------------------------------------------------------------------------------------------------------------------------------------------------------------------------------------------------------------------------------------------------------------------------------------------------------------------------------------------------------------------------------------------------------------------------------------------------------------------------------------------------------------------------------------------------------------------------------------------------------------------------------------------------------------------------------------------------------------------------|--|



|  |                                                                                                                                                                                                                                                                                                                                                                                                                                                                                                                                                                                                                                                                                                                                                                                                                                                                                                                                     |                                                                                                                                                                                                                                                                                                                                                                                                                                                                                                                                                                                                                                                                                                                                                                                                                                                                                                                                                                                                                                                                                                                                                                                                                                                                                                                            |                                                                                                                                                                                                                                                                                                                                                                                                                                                                                                                                                                                                                                                                                                                                                                                                                                             |  |
|--|-------------------------------------------------------------------------------------------------------------------------------------------------------------------------------------------------------------------------------------------------------------------------------------------------------------------------------------------------------------------------------------------------------------------------------------------------------------------------------------------------------------------------------------------------------------------------------------------------------------------------------------------------------------------------------------------------------------------------------------------------------------------------------------------------------------------------------------------------------------------------------------------------------------------------------------|----------------------------------------------------------------------------------------------------------------------------------------------------------------------------------------------------------------------------------------------------------------------------------------------------------------------------------------------------------------------------------------------------------------------------------------------------------------------------------------------------------------------------------------------------------------------------------------------------------------------------------------------------------------------------------------------------------------------------------------------------------------------------------------------------------------------------------------------------------------------------------------------------------------------------------------------------------------------------------------------------------------------------------------------------------------------------------------------------------------------------------------------------------------------------------------------------------------------------------------------------------------------------------------------------------------------------|---------------------------------------------------------------------------------------------------------------------------------------------------------------------------------------------------------------------------------------------------------------------------------------------------------------------------------------------------------------------------------------------------------------------------------------------------------------------------------------------------------------------------------------------------------------------------------------------------------------------------------------------------------------------------------------------------------------------------------------------------------------------------------------------------------------------------------------------|--|
|  | <p>(alealam alearabi)</p> <p>المبادرة العربية<br/>(almubadarat alearabia)</p> <p>للفضية الفلسطينية التي ما زالت تشكل قضية العرب الأولى وجوهر الصراع في المنطقة</p> <p>(llqdyt alfilastiniat alty ma zalat tshkkl qdyt alearab al'uwlaa wajawhar alsirae fi almintaqa)</p> <p>محيطها العربي<br/>(muhituha alearabiu)</p> <p>التنسيق العربي<br/>(altansiq alearabi)</p> <p>وقفة عربية<br/>(waqfat earabia)</p> <p>أمتنا العربية والإسلامي ('umatana alearabiat wal'iislamia)</p> <p>أما لبنان، هذا البلد العربي العزيز ('amma lubnan, hdha albalad alearabiu aleaziz)</p> <p>ضرورة التزام العرب والمجتمع الدولي بتقديم الدعم والمساعدة للحكومة اللبنانية</p> <p>(darurat ailtizam alearab walmujtamae alduwalii bitaqdim aldaem walmusaeadat liihukumat allubnania)</p> <p>تكتيف الجهود العربية والدولية لدعم حق لبنان في استعادة مزارع شبعا</p> <p>(takthif aljuhud alerbyt walduwaliat lidaem haqi lubnan fi aistieadat mazarie</p> | <p>hi alqadiat alrayiysiat lil'umat alearabia)</p> <p>حل للصراع العربي الإسرائيلي، لابد أن يضمن إقامة الدولة الفلسطينية المستقلة على الأرض الفلسطينية وعاصمتها القدس</p> <p>(hala lilsirae alearabii al'iisrayilii, labda 'an yadman 'iiqamat aldawlat alfilastiniat almustaqilat ealaa al'ard alfilastiniat waeasimatuha alquds)</p> <p>لتسوية القضية الفلسطينية<br/>(litaswiat alqadiat alfilastinia)</p> <p>ن استمرار التدخل الخارجي في الشؤون الفلسطينية، هو السبب الرئيسي لاستمرار الانقسام الفلسطيني</p> <p>(n aistimrar altadakhul alkharijii fi alshuwuwn alfilastiniati, hu alsabab alrayiysiu liaistimrar alainqisam alfilastinii)</p> <p>مما سيؤدي في النهاية، إلى تراجع التأييد الدولي للقضية الفلسطينية، وخدمة المخططات الإسرائيلية</p> <p>(mimma sayuadiy fi alnihayati, 'iilaa tarajue altaayid alduwalii liilqadiat alfilastiniati, wakhidmat almukhatatat al'iisrayiylia)</p> <p>التصدي بقوة للتدخل الخارجي في الشؤون الداخلية الفلسطينية</p> <p>(altasadiy biquat liiltadakhul alkharijii fi alshuwuwn alddakhiliat alfilastinia)</p> <p>وتحقيق المصالحة الوطنية، بين الفصائل الفلسطينية،</p> <p>(watahqi almusalahat alwataniati, bayn alfasayil alfilastiniati)</p> <p>وحدة القرار الفلسطيني<br/>(wahdat alqarar alfilastinii)</p> <p>ويمكن القيادة الفلسطينية، من الحصول على حقوق الشعب الفلسطيني</p> | <p>)</p> <p>للإسلام الحنيف المعتدل،</p> <p>(lil'iislam alhanif almuetaadil, )</p> <p>الإسلام الذي تطلعنا إليه دائماً؛ وهو الإسلام الذي يتشرف بالانتساب إليه ما يزيد على 95% من مسلمي العالم</p> <p>(al'iislam aldhy tatalaena 'iilayh daymaan; wahu al'iislam aldhy yatasharaf bialaintisab 'iilayh ma yazid ealaa 95% min muslimi alealam)</p> <p>المعرفة الحقيقية والتفهم الحقيقي للإسلام وللاديان والثقافات الأخرى هما المفتاح للسلام</p> <p>(almaerifat alhaqiqiat waltfhhm alhaqiqiu lil'iislam walii'adian walthaqafat al'ukhraa huma almufattah lilsalam )</p> <p>التمسك بالإسلام الحقيقي، الذي يدعو إلى السلام والتسامح والرحمة</p> <p>(altamasuk bial'iislam alhaqiqi, aldhy yadeu 'iilaa alsalam waltasamuh walrahma )</p> <p>وتوحيد كلمة الأمة العربية والإسلامية،</p> <p>(watawhid kalimat alammt alerbyt wal'iislamiati, )</p> |  |
|--|-------------------------------------------------------------------------------------------------------------------------------------------------------------------------------------------------------------------------------------------------------------------------------------------------------------------------------------------------------------------------------------------------------------------------------------------------------------------------------------------------------------------------------------------------------------------------------------------------------------------------------------------------------------------------------------------------------------------------------------------------------------------------------------------------------------------------------------------------------------------------------------------------------------------------------------|----------------------------------------------------------------------------------------------------------------------------------------------------------------------------------------------------------------------------------------------------------------------------------------------------------------------------------------------------------------------------------------------------------------------------------------------------------------------------------------------------------------------------------------------------------------------------------------------------------------------------------------------------------------------------------------------------------------------------------------------------------------------------------------------------------------------------------------------------------------------------------------------------------------------------------------------------------------------------------------------------------------------------------------------------------------------------------------------------------------------------------------------------------------------------------------------------------------------------------------------------------------------------------------------------------------------------|---------------------------------------------------------------------------------------------------------------------------------------------------------------------------------------------------------------------------------------------------------------------------------------------------------------------------------------------------------------------------------------------------------------------------------------------------------------------------------------------------------------------------------------------------------------------------------------------------------------------------------------------------------------------------------------------------------------------------------------------------------------------------------------------------------------------------------------------|--|

|  |                                                                                                                                                                                                                                                                                                                                                                                                                                                                                                                                                                                                                                                                                                                                                                                                                                                                                                                                                                          |                                                                                                                                                                                                                                                                                                                                                                                                                                                                                                                                                                                                                                                                                                                                                                                                                                                            |  |                                                                                                                                                                                                                                                                                                                                                                                                                                                                                                                                                                                                                                                                                                                                                                              |
|--|--------------------------------------------------------------------------------------------------------------------------------------------------------------------------------------------------------------------------------------------------------------------------------------------------------------------------------------------------------------------------------------------------------------------------------------------------------------------------------------------------------------------------------------------------------------------------------------------------------------------------------------------------------------------------------------------------------------------------------------------------------------------------------------------------------------------------------------------------------------------------------------------------------------------------------------------------------------------------|------------------------------------------------------------------------------------------------------------------------------------------------------------------------------------------------------------------------------------------------------------------------------------------------------------------------------------------------------------------------------------------------------------------------------------------------------------------------------------------------------------------------------------------------------------------------------------------------------------------------------------------------------------------------------------------------------------------------------------------------------------------------------------------------------------------------------------------------------------|--|------------------------------------------------------------------------------------------------------------------------------------------------------------------------------------------------------------------------------------------------------------------------------------------------------------------------------------------------------------------------------------------------------------------------------------------------------------------------------------------------------------------------------------------------------------------------------------------------------------------------------------------------------------------------------------------------------------------------------------------------------------------------------|
|  | <p>shbea)</p> <p>لبناء ثقل عربي - إقليمي نواجه<br/>به التحديات والأخطار التي<br/>تحيط بنا</p> <p>(libina' thiq<br/>earabiin - 'iiqlimiin<br/>nuajih bih<br/>altahadiyat<br/>wal'akhtar alty<br/>tuhit bina)</p> <p>موقف عربي موحد<br/>(mawqif earabiun<br/>muahad)</p> <p>ديننا الحنيف وتقاليدنا العربية<br/>الأصيلة،</p> <p>(dinana alhanif<br/>wataqaliduna<br/>alearabiat<br/>al'asilat)</p> <p>الجامعة العربية<br/>(aljamieat<br/>alearabia)</p> <p>العمل العربي المشترك<br/>(aleamal<br/>alearabiu<br/>almushtarak)</p> <p>"اتفاقية الدفاع العربي المشترك<br/>(atifaqiat aldifae<br/>alearabii<br/>almushtarak)</p> <p>الوحدة الاقتصادية العربية</p> <p>(alwahdat<br/>alaiqtisadiat<br/>alearabia)</p> <p>السوق العربية المشتركة<br/>(alsuwq alearabiat<br/>almushtaraka)</p> <p>قمة عربيّة اقتصادية<br/>مخصّصة</p> <p>(qmmt erbyt<br/>aiqtisadiat<br/>mtkhsss)</p> <p>وتعزيز التجارة<br/>العربية البينية<br/>والنوعيّة،<br/>(wataeziz altijarat<br/>alearabiat</p> | <p>(wymkkn alqiadat<br/>alfilastiniatu, min alhusul<br/>ealaa huquq alshaeb<br/>alfilastinii)</p> <p>فلا بد من دعم السلطة الوطنية الفلسطينية،<br/>(fla bd min daem alsultat<br/>alwataniat alfilastiniat,)</p> <p>تقديم كافة أشكال الدعم للشعب الفلسطيني<br/>(taqdim kaft 'ashkal<br/>aldaem lilshaeb<br/>alfilastinii)</p> <p>الضغط على إسرائيل، لوقف سياسات العدوان<br/>والحصار والإغلاق والاستيطان والتهجير،<br/>التي تمارسها على الشعب الفلسطيني<br/>(aldaght ealaa 'iisrayiyl,<br/>liwaqf siasat aleudwan<br/>walhisar wal'iighlaq<br/>walaistitan waltahjiri, alty<br/>tumarisuha ealaa alshaeb<br/>alfilastinii)</p> <p>ويضمن حقوق الشعب الفلسطيني، وعلى<br/>أساس حل الدولتين الذي يتبناه المجتمع الدولي</p> <p>(wayadman huquq<br/>alshaeb alfilastiniu,<br/>waealaa 'asas hali<br/>aldawlatayn aldhy<br/>yatabannah almujtamae<br/>alduwaliu)</p> |  | <p>الدول الإسلامية الشقيقة<br/>(alduwal<br/>al'iislatmiat<br/>alshaqiaqa<br/>)</p> <p>أمتنا العربية والإسلامية</p> <p>('umatana<br/>alearabiat<br/>wal'iislatmia<br/>)</p> <p>المذاهب الإسلامية<br/>(almadhahib<br/>al'iislatmia<br/>)</p> <p>خلال إبراز الصورة<br/>الحقيقية والمشرقة<br/>للإسلام الذي يدعو<br/>للاعتدال والتسامح<br/>والسلام</p> <p>(khilal 'iibraz<br/>alsuwrat alhaqiqiat<br/>walmushariqat<br/>lil'iislam aldhy<br/>yadeu lilaietidal<br/>waltasamuh<br/>walsalam<br/>)</p> <p>إعطاء الإسلام<br/>المعتدل الصوت<br/>والحضور البارز</p> <p>('iieta' al'iislam<br/>almuetadiil alsawt<br/>walhudur albariz<br/>)</p> <p>لتوحيد الصف<br/>العربي وتمتين<br/>الموقف الإسلامي</p> <p>(litawhid alsafi<br/>alearabii watamtin<br/>almawqif al'iislamii<br/>)</p> |
|--|--------------------------------------------------------------------------------------------------------------------------------------------------------------------------------------------------------------------------------------------------------------------------------------------------------------------------------------------------------------------------------------------------------------------------------------------------------------------------------------------------------------------------------------------------------------------------------------------------------------------------------------------------------------------------------------------------------------------------------------------------------------------------------------------------------------------------------------------------------------------------------------------------------------------------------------------------------------------------|------------------------------------------------------------------------------------------------------------------------------------------------------------------------------------------------------------------------------------------------------------------------------------------------------------------------------------------------------------------------------------------------------------------------------------------------------------------------------------------------------------------------------------------------------------------------------------------------------------------------------------------------------------------------------------------------------------------------------------------------------------------------------------------------------------------------------------------------------------|--|------------------------------------------------------------------------------------------------------------------------------------------------------------------------------------------------------------------------------------------------------------------------------------------------------------------------------------------------------------------------------------------------------------------------------------------------------------------------------------------------------------------------------------------------------------------------------------------------------------------------------------------------------------------------------------------------------------------------------------------------------------------------------|

|  |                                                                                                                                                                                                                                                                                                                                                                                                                                                                                                                                                                                                                                                                                                                                                                                                     |  |  |                                                                                                                                                                                                                                                                                                                                                                                                                                                                                                                                                                                                                                                                                 |  |
|--|-----------------------------------------------------------------------------------------------------------------------------------------------------------------------------------------------------------------------------------------------------------------------------------------------------------------------------------------------------------------------------------------------------------------------------------------------------------------------------------------------------------------------------------------------------------------------------------------------------------------------------------------------------------------------------------------------------------------------------------------------------------------------------------------------------|--|--|---------------------------------------------------------------------------------------------------------------------------------------------------------------------------------------------------------------------------------------------------------------------------------------------------------------------------------------------------------------------------------------------------------------------------------------------------------------------------------------------------------------------------------------------------------------------------------------------------------------------------------------------------------------------------------|--|
|  | <p>albayniat<br/>walnweyt)</p> <p>الاقتصادي العربي،<br/>(alaiqtisadiu<br/>alearabiu)</p> <p>القمة العربية<br/>(alqmmt alearabi)</p> <p>للعمل العربي<br/>المشترك<br/>(lileamal alearabii<br/>almushtarak)</p> <p>وتفعيل عملنا العربي<br/>المشترك<br/>(watafeil eamilna<br/>alerby<br/>almushtarak)</p> <p>مركز عربي سلمي<br/>لاستخدام الطاقة<br/>النووية<br/>(markaz earabi<br/>silmiun<br/>liaistikhdam<br/>alttaqt alnawawia)</p> <p>لعمل عربي مؤسسي<br/>وفاعل، يعيد الثقة<br/>بالنظام العربي،<br/>ويكرس مصداقيته،<br/>(lieamal earabiin<br/>muasisiin wafaeil,<br/>yueid althiqat<br/>bialnizam<br/>alearabii,<br/>wayukris<br/>musdaqiatah)</p> <p>للمملكة العربية<br/>السعودية<br/>(lilmamlakat<br/>alearabiat<br/>alsaeudia)</p> <p>لتوحيد الصف العربي<br/>(litawhid alsafi<br/>alearabii)</p> |  |  | <p>و منظمة المؤتمر<br/>الإسلامي<br/>(wamunazamat<br/>almutamar<br/>al'iislamii<br/>)</p> <p>قواعد الاعتدال<br/>والتسامح والتفاهم<br/>والتعايش، التي تمثل<br/>رسالة الإسلام السمحة<br/>(qawaeid<br/>alaietidal<br/>waltasamuh<br/>waltafahum<br/>waltaeayush, alty<br/>tumathil risalat<br/>al'islam alsamha<br/>)</p> <p>أمتنا العربية<br/>والإسلامية،<br/>(umatana<br/>alearabiat<br/>wal'iislat, )</p> <p>أمتنا العربية<br/>والإسلامية،<br/>(umatana<br/>alearabiat<br/>wal'iislat, )</p> <p>أمتنا العربية<br/>والإسلامية،<br/>(umatana<br/>alearabiat<br/>wal'iislat, )</p> <p>أبناء الأمتين العربية<br/>والإسلامية<br/>(abna' al'amtayn<br/>alearabiat<br/>wal'iislat )</p> |  |
|--|-----------------------------------------------------------------------------------------------------------------------------------------------------------------------------------------------------------------------------------------------------------------------------------------------------------------------------------------------------------------------------------------------------------------------------------------------------------------------------------------------------------------------------------------------------------------------------------------------------------------------------------------------------------------------------------------------------------------------------------------------------------------------------------------------------|--|--|---------------------------------------------------------------------------------------------------------------------------------------------------------------------------------------------------------------------------------------------------------------------------------------------------------------------------------------------------------------------------------------------------------------------------------------------------------------------------------------------------------------------------------------------------------------------------------------------------------------------------------------------------------------------------------|--|

|  |                                                                                                                                                                                                                                                                                                                                                                                                                                                                                                                                                                                                                                                                                                                                                                                                                   |  |  |  |  |
|--|-------------------------------------------------------------------------------------------------------------------------------------------------------------------------------------------------------------------------------------------------------------------------------------------------------------------------------------------------------------------------------------------------------------------------------------------------------------------------------------------------------------------------------------------------------------------------------------------------------------------------------------------------------------------------------------------------------------------------------------------------------------------------------------------------------------------|--|--|--|--|
|  | <p>فالدول العربية تقف<br/>متحدة وراء مبادرة<br/>السلام العربية<br/>(falduwal<br/>alearabiat taqifu<br/>mthdtan wara'<br/>mubadarat<br/>alsalam<br/>alearabia)</p> <p>مبادئ ورسالة<br/>الثورة العربية الكبرى<br/>(mabadi warisalat<br/>althawrat<br/>alearabiat<br/>alkubraa)</p> <p>الصراع العربي<br/>الإسرائيلي<br/>(alsirae alearabiu<br/>al'iisrayiliu)</p> <p>ورفضه للمساومة أو<br/>التفريط بأي حق من<br/>حقوق الأمة العربية<br/>(warafadah<br/>lilmusawamat 'aw<br/>altafrit bi'ayi haqin<br/>min huquq al'umat<br/>alearabia)</p> <p>والأشقاء العرب<br/>(wal'ashiqqa'<br/>alearab)</p> <p>الأمة العربية<br/>(al'umat alearabi)</p> <p>الحق العربي في<br/>فلسطين<br/>(alhaqu alearabiu<br/>fi filastin)</p> <p>وإرادة سياسية<br/>عربية<br/>(wa'iiradat siasiat<br/>earabih)</p> <p>المبادرة العربية التي</p> |  |  |  |  |
|--|-------------------------------------------------------------------------------------------------------------------------------------------------------------------------------------------------------------------------------------------------------------------------------------------------------------------------------------------------------------------------------------------------------------------------------------------------------------------------------------------------------------------------------------------------------------------------------------------------------------------------------------------------------------------------------------------------------------------------------------------------------------------------------------------------------------------|--|--|--|--|

|  |                                                                                                                                                                                                                                                                                                                                                                                                                                                                                                                                                                                                                                                                                                                                                                           |  |  |  |  |
|--|---------------------------------------------------------------------------------------------------------------------------------------------------------------------------------------------------------------------------------------------------------------------------------------------------------------------------------------------------------------------------------------------------------------------------------------------------------------------------------------------------------------------------------------------------------------------------------------------------------------------------------------------------------------------------------------------------------------------------------------------------------------------------|--|--|--|--|
|  | <p>أجمع عليها العرب<br/>في قمة بيروت<br/>(almubadarat<br/>alearabiat alty<br/>'ajmae ealayha<br/>alearab fi qimat<br/>bayrut)</p> <p>ولم تفرط بأي من<br/>الحقوق العربية<br/>(walam tufrat<br/>bi'ayu min<br/>alhuquq<br/>alearabia)</p> <p>لاسترجاع الحقوق<br/>الفلسطينية والعربية<br/>(liaistirjae alhuquq<br/>alfilastiniat<br/>walearabia)</p> <p>بالمبادرة العربية<br/>للسلام<br/>(bialmubadarat<br/>alearabiat liisala)</p> <p>كل العرب<br/>والمسلمين<br/>(klu alearab<br/>walmuslimin)</p> <p>لتوحيد كلمة العرب<br/>(tawhid kalamat<br/>alearab)</p> <p>تطلعات الشعوب<br/>العربية وآمالها<br/>بتوحيد الصف،<br/>وتمتين الجبهة<br/>العربية.</p> <p>(tatalueat<br/>alshueub<br/>alearabiat<br/>wamaliha<br/>bitawhid alsaf,<br/>watamtin aljabhat<br/>alearabiati)</p> |  |  |  |  |
|--|---------------------------------------------------------------------------------------------------------------------------------------------------------------------------------------------------------------------------------------------------------------------------------------------------------------------------------------------------------------------------------------------------------------------------------------------------------------------------------------------------------------------------------------------------------------------------------------------------------------------------------------------------------------------------------------------------------------------------------------------------------------------------|--|--|--|--|

|  |                                                                                                    |  |  |  |  |
|--|----------------------------------------------------------------------------------------------------|--|--|--|--|
|  | الجيش العربي<br>(aljaysh alearabi)                                                                 |  |  |  |  |
|  | هذا الحمى العربي<br>الأصيل<br>(hadha alhumaa<br>alearabiu al'asil)                                 |  |  |  |  |
|  | مبادئ ورسالة الثورة<br>العربية الكبرى<br>(mabadi warisalat<br>althawrat<br>alearabiat<br>alkubraa) |  |  |  |  |
|  | الجيش العربي،<br>(aljaysh alearabi)                                                                |  |  |  |  |
|  | الجيش العربي،<br>(aljaysh alearabi)                                                                |  |  |  |  |
|  | الأرض العربية<br>(al'ard alearabia)                                                                |  |  |  |  |
|  | الجيش العربي،<br>(aljaysh alearabi)                                                                |  |  |  |  |
|  | الجيش العربي،<br>(aljaysh alearabi)                                                                |  |  |  |  |
|  | الجيش العربي،<br>(aljaysh alearabi)                                                                |  |  |  |  |
|  | الجيش العربي،<br>(aljaysh alearabi)                                                                |  |  |  |  |
|  | الجيش العربي،<br>(aljaysh alearabi)                                                                |  |  |  |  |
|  | الجيش العربي،<br>(aljaysh alearabi)                                                                |  |  |  |  |
|  | وبطولات الجيش                                                                                      |  |  |  |  |

|  |                                                                                                                                                                                                                                                                                                                                                                                                                                                                                                                                                                                                                                                                                                                                                                                                                              |  |  |  |  |
|--|------------------------------------------------------------------------------------------------------------------------------------------------------------------------------------------------------------------------------------------------------------------------------------------------------------------------------------------------------------------------------------------------------------------------------------------------------------------------------------------------------------------------------------------------------------------------------------------------------------------------------------------------------------------------------------------------------------------------------------------------------------------------------------------------------------------------------|--|--|--|--|
|  | <p>العربي<br/>(wabutulat aljaysh<br/>alearabii)</p> <p>الجيش العربي،<br/>(aljaysh alearabi)</p> <p>لشهداء الجيش العربي<br/>في معركة الكرامة،<br/><br/>(lishuhada'<br/>aljaysh alearabii fi<br/>maerakat<br/>alkaramati)</p> <p>للدفاع عن الأرض<br/>العربية والكرامة<br/>العربية، سواء في<br/>فلسطين، أو في أي<br/>مكان، من الوطن<br/>العربي الكبير.<br/>(lildifae ean al'ard<br/>alearabiat<br/>walkaramat<br/>alearabiati, swa' fi<br/>filastina, 'aw fi 'ayi<br/>makanin, min<br/>alwatan alearabii<br/>alkabir)</p> <p>ستبقى معارك<br/>الجيش العربي<br/>وتضحياته<br/>(satabqaa<br/>maearik aljaysh<br/>alearabii<br/>watadhiatuh)</p> <p>الجيش العربي،<br/>(aljaysh alearabi)</p> <p>الإجماع العربي<br/>(al'ijmae<br/>alearabiu)</p> <p>لخدمة أمتنا العربية<br/>والإسلامية<br/>(likhidmat<br/>'umatana<br/>alearabiat</p> |  |  |  |  |
|--|------------------------------------------------------------------------------------------------------------------------------------------------------------------------------------------------------------------------------------------------------------------------------------------------------------------------------------------------------------------------------------------------------------------------------------------------------------------------------------------------------------------------------------------------------------------------------------------------------------------------------------------------------------------------------------------------------------------------------------------------------------------------------------------------------------------------------|--|--|--|--|

|  |                                                                                                                                                                                                                                                                                                                                                                                                                                                                                                                                                                                                                                                                                                                                                                                           |  |  |  |  |
|--|-------------------------------------------------------------------------------------------------------------------------------------------------------------------------------------------------------------------------------------------------------------------------------------------------------------------------------------------------------------------------------------------------------------------------------------------------------------------------------------------------------------------------------------------------------------------------------------------------------------------------------------------------------------------------------------------------------------------------------------------------------------------------------------------|--|--|--|--|
|  | <p>wal'iislamia)</p> <p>الجيش العربي،<br/>(aljaysh alearabi)</p> <p>لرسالة الثورة<br/>العربية<br/>(risalat althawrat<br/>alearabia)</p> <p>لأسر وعائلات<br/>النشامى في الجيش<br/>العربي<br/>(li'asr waeayilat<br/>alnshama fi<br/>aljaysh alearabii)</p> <p>الجيش العربي،<br/>(aljaysh alearabi)</p> <p>ولأمتنا العربية<br/>والإسلامية .<br/>(wali'umatina<br/>alearabiat<br/>wal'iislamia)</p> <p>التضحيات<br/>والبطولات التاريخية،<br/>لأمتنا العربية<br/>والإسلامية،<br/><br/>(altadhiat<br/>walbutulat<br/>altaarikhiatu,<br/>li'umatina<br/>alearabiat<br/>wal'iislamiati)</p> <p>والإنتصارات، التي<br/>حققها الأجداد، من<br/>العرب والمسلمين،<br/>(wal'iintisaratu,<br/>alty haqaqaha<br/>al'ajdadu, min<br/>alearab<br/>walmuslimina)</p> <p>الجيش العربي له<br/>مكانة خاصة في</p> |  |  |  |  |
|--|-------------------------------------------------------------------------------------------------------------------------------------------------------------------------------------------------------------------------------------------------------------------------------------------------------------------------------------------------------------------------------------------------------------------------------------------------------------------------------------------------------------------------------------------------------------------------------------------------------------------------------------------------------------------------------------------------------------------------------------------------------------------------------------------|--|--|--|--|



|  |                                                                                                                                                                                                                                                                                                                                                                                                                                                                                                                                                                                                                                                                                                                                                                                                                                            |  |  |  |  |
|--|--------------------------------------------------------------------------------------------------------------------------------------------------------------------------------------------------------------------------------------------------------------------------------------------------------------------------------------------------------------------------------------------------------------------------------------------------------------------------------------------------------------------------------------------------------------------------------------------------------------------------------------------------------------------------------------------------------------------------------------------------------------------------------------------------------------------------------------------|--|--|--|--|
|  | <p>نفسى<br/>(aljaysh alearabiu<br/>lah mkant khasat<br/>fi nafsi)</p> <p>مؤتمر القمة العربية<br/>(mutamar alqimat<br/>alearabia)</p> <p>سيدنا محمد النبي<br/>العربي الأمين<br/>(sayiduna<br/>muhamad alnabii<br/>alearabi al'amin)</p> <p>الأمين العام لجامعة<br/>الدول العربية،<br/>(al'amin aleamu<br/>lijamieat alduwal<br/>alearabiati)</p> <p>وأمتنا العربية تواجه<br/>العديد من التحديات<br/>(wa'umatuna<br/>alearabiat tuajih<br/>aledyd min<br/>altahadiyat)</p> <p>وتحولات، تهدد الأمن<br/>العربي، وتدفع<br/>بالمنطقة إلى المزيد<br/>من التوتر<br/>(watahawalatun,<br/>tuhadid al'amn<br/>alearabii,<br/>watadfae<br/>balmntqt 'iilaa<br/>almazid min<br/>altawatur)</p> <p>تنقية الأجواء العربية<br/>(tanqiat al'ajwa'<br/>alearabia)</p> <p>وتعزيز مبدأ التضامن<br/>العربي<br/>(wataeziz mabda<br/>altadamun<br/>alearabii)</p> |  |  |  |  |
|--|--------------------------------------------------------------------------------------------------------------------------------------------------------------------------------------------------------------------------------------------------------------------------------------------------------------------------------------------------------------------------------------------------------------------------------------------------------------------------------------------------------------------------------------------------------------------------------------------------------------------------------------------------------------------------------------------------------------------------------------------------------------------------------------------------------------------------------------------|--|--|--|--|

|  |                                                                                                                                                                                                                                                                                                                                                                                                                                                                                                                                                                                                                                                                                                                                                                                                                                                                                            |  |  |  |  |
|--|--------------------------------------------------------------------------------------------------------------------------------------------------------------------------------------------------------------------------------------------------------------------------------------------------------------------------------------------------------------------------------------------------------------------------------------------------------------------------------------------------------------------------------------------------------------------------------------------------------------------------------------------------------------------------------------------------------------------------------------------------------------------------------------------------------------------------------------------------------------------------------------------|--|--|--|--|
|  | <p>من أجل تحقيق<br/>المصالحة العربية،</p> <p>(min ajl tahqiq<br/>almusalahat<br/>alearabiat)</p> <p>وتوحيد الصف<br/>العربي.</p> <p>(watawhid alsafi<br/>alearabi)</p> <p>إن التضامن العربي<br/>ليس شعارا يرفع</p> <p>('iina altadamun<br/>alearabia lays<br/>shiearaan yarif)</p> <p>إن القضية الفلسطينية<br/>هي القضية الرئيسية<br/>للأمة العربية</p> <p>('iina alqadiat<br/>alfilastiniat hi<br/>alqadiat<br/>alrayiysiat lil'umat<br/>alearabia)</p> <p>والمبادرة العربية،<br/>التي تؤكد على أن أي<br/>حل للصراع العربي<br/>الإسرائيلي، لابد أن<br/>يضمن إقامة الدولة<br/>الفلسطينية المستقلة</p> <p>(walmubadarat<br/>alearabiatu, alty<br/>tuakid ealaa 'ana<br/>'aya halin lilsirae<br/>alearabii<br/>al'iisrayili, labda<br/>'an yadman<br/>'iiqamat aldawlat<br/>alfilastiniat<br/>almustaqila)</p> <p>انسحاب إسرائيل من<br/>جميع الأراضي<br/>العربية المحتلة منذ<br/>عام 1967</p> |  |  |  |  |
|--|--------------------------------------------------------------------------------------------------------------------------------------------------------------------------------------------------------------------------------------------------------------------------------------------------------------------------------------------------------------------------------------------------------------------------------------------------------------------------------------------------------------------------------------------------------------------------------------------------------------------------------------------------------------------------------------------------------------------------------------------------------------------------------------------------------------------------------------------------------------------------------------------|--|--|--|--|

|  |                                                                                                                                                                                                                                                                                                                                                                                                                                                                                                                                                                                                                                                                                                                                                                                                                                                                             |  |  |  |  |
|--|-----------------------------------------------------------------------------------------------------------------------------------------------------------------------------------------------------------------------------------------------------------------------------------------------------------------------------------------------------------------------------------------------------------------------------------------------------------------------------------------------------------------------------------------------------------------------------------------------------------------------------------------------------------------------------------------------------------------------------------------------------------------------------------------------------------------------------------------------------------------------------|--|--|--|--|
|  | <p>(ainsihab 'iisrayiyl<br/>min jmye al'aradi<br/>alearabiat<br/>almuhtalat mundh<br/>eam 1967)</p> <p>ضرورة الاتفاق على<br/>خطة عمل عربية،<br/>لحماية القدس من<br/>محاولات تغيير<br/>هويتها العربية<br/>وتفريغها من أهلها<br/>(darurat alaitifaq<br/>ealaa khutat<br/>eamal earabit,<br/>lihimayat alquds<br/>min muhawalat<br/>taghyir huiataha<br/>alearabiat<br/>watafrighiha min<br/>'ahliha)</p> <p>فلا بد من التمسك<br/>بمبادرة السلام<br/>العربية،<br/>(fla bd min<br/>altamasuk<br/>bimubadarat<br/>alsalam<br/>alearabiati)</p> <p>لتسوية الصراع<br/>العربي الإسرائيلي<br/>(litaswiat alsirae<br/>alearabii<br/>al'iisrayiili)</p> <p>الدول العربية<br/>(alduwal alearabi)</p> <p>إلا إذا قبلت إسرائيل<br/>بالمبادرة العربية<br/>('illa 'iidha qabalat<br/>'iisrayiyl<br/>biamubadarat<br/>alearabia)</p> <p>الجامعة العربية،<br/>(aljamieat<br/>alearabiat,)</p> |  |  |  |  |
|--|-----------------------------------------------------------------------------------------------------------------------------------------------------------------------------------------------------------------------------------------------------------------------------------------------------------------------------------------------------------------------------------------------------------------------------------------------------------------------------------------------------------------------------------------------------------------------------------------------------------------------------------------------------------------------------------------------------------------------------------------------------------------------------------------------------------------------------------------------------------------------------|--|--|--|--|

|  |                                                                                                                                                                                                                                                                                                                                                                                                                                                                                                                                                                                           |  |  |  |  |
|--|-------------------------------------------------------------------------------------------------------------------------------------------------------------------------------------------------------------------------------------------------------------------------------------------------------------------------------------------------------------------------------------------------------------------------------------------------------------------------------------------------------------------------------------------------------------------------------------------|--|--|--|--|
|  | <p>والقضايا المحورية<br/>العربية.<br/>(walqadaya<br/>almihwariat<br/>alearabiati)</p> <p>البلدان العربية<br/>(albuldan<br/>alearabia)</p> <p>دولة عربية<br/>(dawlat earabia)</p> <p>منطقة الخليج العربي<br/>(mintaqat alkhalij<br/>alearabii)</p> <p>للقيمة العربية<br/>(lilqimat alearabi)</p> <p>الجامعة العربية<br/>(aljamieat<br/>alearabia)</p> <p>سيدنا محمد، النبي<br/>العربي الهاشمي<br/>الأمين<br/>(sayiduna<br/>muhmid, alnabii<br/>alearabiu<br/>alhashimiu al'ami)</p> <p>أبناء الأمتين العربية<br/>والإسلامية،<br/>( 'abna ' al'umtayn<br/>alearabiat<br/>wal'iislatmat)</p> |  |  |  |  |
|--|-------------------------------------------------------------------------------------------------------------------------------------------------------------------------------------------------------------------------------------------------------------------------------------------------------------------------------------------------------------------------------------------------------------------------------------------------------------------------------------------------------------------------------------------------------------------------------------------|--|--|--|--|

*(Appendix 4)- A summary of frequencies and collocations of the five nouns in English*

| Israel/israeli/israel<br>is/ israeli's                                                                                                                                                                                                                                                                                                                                                                                                                                                                                                                                                                                                                                                                                                                                                                                                                                                                                                                                                                                                                                  | Arab/arabia/arabs                                                                                                                                                                                                                                                                                                                                                                                                                                                                                                                                                                                                                                                                                                                                                                                                                                                                                                                                                                                                  | Palestine/palestinian/p<br>alestinians                                                                                                                                                                                                                                                                                                                                                                                                                                                                                                                                                                                                                                                                                                                                                                                                                                                                                                                                                                                                                | Terrorism/terror/terro<br>rist/terrorists                                                                                                                                                                                                                                                                                                                                                                                                                                                                                                                                                                                                                                                                                                                                                                                                                                                                                                                                                                                                                         | Islam/islamic/islam's                                                                                                                                                                                                                                                                                                                                                                                                                                                                                                                                                                                                                                                                                                                                                                                                                                                                                                                                                                                                                                                                                                       | Key Words                     |
|-------------------------------------------------------------------------------------------------------------------------------------------------------------------------------------------------------------------------------------------------------------------------------------------------------------------------------------------------------------------------------------------------------------------------------------------------------------------------------------------------------------------------------------------------------------------------------------------------------------------------------------------------------------------------------------------------------------------------------------------------------------------------------------------------------------------------------------------------------------------------------------------------------------------------------------------------------------------------------------------------------------------------------------------------------------------------|--------------------------------------------------------------------------------------------------------------------------------------------------------------------------------------------------------------------------------------------------------------------------------------------------------------------------------------------------------------------------------------------------------------------------------------------------------------------------------------------------------------------------------------------------------------------------------------------------------------------------------------------------------------------------------------------------------------------------------------------------------------------------------------------------------------------------------------------------------------------------------------------------------------------------------------------------------------------------------------------------------------------|-------------------------------------------------------------------------------------------------------------------------------------------------------------------------------------------------------------------------------------------------------------------------------------------------------------------------------------------------------------------------------------------------------------------------------------------------------------------------------------------------------------------------------------------------------------------------------------------------------------------------------------------------------------------------------------------------------------------------------------------------------------------------------------------------------------------------------------------------------------------------------------------------------------------------------------------------------------------------------------------------------------------------------------------------------|-------------------------------------------------------------------------------------------------------------------------------------------------------------------------------------------------------------------------------------------------------------------------------------------------------------------------------------------------------------------------------------------------------------------------------------------------------------------------------------------------------------------------------------------------------------------------------------------------------------------------------------------------------------------------------------------------------------------------------------------------------------------------------------------------------------------------------------------------------------------------------------------------------------------------------------------------------------------------------------------------------------------------------------------------------------------|-----------------------------------------------------------------------------------------------------------------------------------------------------------------------------------------------------------------------------------------------------------------------------------------------------------------------------------------------------------------------------------------------------------------------------------------------------------------------------------------------------------------------------------------------------------------------------------------------------------------------------------------------------------------------------------------------------------------------------------------------------------------------------------------------------------------------------------------------------------------------------------------------------------------------------------------------------------------------------------------------------------------------------------------------------------------------------------------------------------------------------|-------------------------------|
| 106                                                                                                                                                                                                                                                                                                                                                                                                                                                                                                                                                                                                                                                                                                                                                                                                                                                                                                                                                                                                                                                                     | 123                                                                                                                                                                                                                                                                                                                                                                                                                                                                                                                                                                                                                                                                                                                                                                                                                                                                                                                                                                                                                | 110                                                                                                                                                                                                                                                                                                                                                                                                                                                                                                                                                                                                                                                                                                                                                                                                                                                                                                                                                                                                                                                   | 29                                                                                                                                                                                                                                                                                                                                                                                                                                                                                                                                                                                                                                                                                                                                                                                                                                                                                                                                                                                                                                                                | 79                                                                                                                                                                                                                                                                                                                                                                                                                                                                                                                                                                                                                                                                                                                                                                                                                                                                                                                                                                                                                                                                                                                          | Frequency<br>of<br>occurrence |
| <p>Jordan and Israel signed a peace treaty in 1994.</p> <p>to the day when two states, Palestine and Israel, can live together, side by side, in peace and security.</p> <p>that addresses the needs of both Palestinians and Israelis. To the Israelis, this plan offers collective security guarantees by all Arabs,</p> <p>the Palestinians and Israelis, who have to come together to resolve the many outstanding issues that divide you.</p> <p>Blowing up buses will not induce Israelis to move forward, and neither would the killing of Palestinians or the demolition of their homes and their future.</p> <p>Palestinians and Israelis have signed on to the Peace Road Map,</p> <p>To the Israelis, this plan offers collective security guarantees by all Arabs,</p> <p>we talked about winning a commitment to the roadmap to peace for Israel and Palestine</p> <p>we witnessed Palestinians and Israelis affirm their sincere intent to pursue the road to peace: to the Israelis, the roadmap offers collective security guarantees by all Arabs;</p> | <p>this plan offers collective security guarantees by all Arabs, a peace treaty and normal relations with Arab states, and an end to the conflict.</p> <p>the roadmap offers collective security guarantees by all Arabs; a peace treaty and normal relations with Arab states; and an end to the conflict.</p> <p>It's true that in the Arab world, there is much less extreme poverty than in other developing regions.</p> <p>half of the Arab population is younger than 18.</p> <p>Central to Jordan's identity is that of an Arab and Islamic country.</p> <p>Great Arab cities provided refuge and new ideas to travellers from around the world.</p> <p>injustice that is so deeply felt by the Arab people, both Christians and Muslims</p> <p>the Arab-Israeli conflict.</p> <p>believe we are creating a model process that can benefit the Arab world as a whole.</p> <p>The international community must also solve, and solve now, the central crisis in our region – the Arab-Israeli conflict.</p> | <p>Palestine and Israel, can live together, side by side.</p> <p>the road map, that addresses the needs of both Palestinians and Israelis.</p> <p>To the Palestinians, it offers an end to the occupation the Palestinians and Israelis, who have to come together to resolve the many outstanding issues that divide you.</p> <p>just resolution of the Arab-Israeli conflict and the question of Palestine.</p> <p>Palestinians and Israelis have signed on to the Peace Road Map.</p> <p>To Palestinians, it offers an end to the occupation.</p> <p>Then, we talked about winning a commitment to the roadmap to peace for Israel and Palestine.</p> <p>we witnessed Palestinians and Israelis affirm their sincere intent to pursue the road to peace.</p> <p>; a viable, independent state.</p> <p>the continuing occupation of Palestine..</p> <p>Ongoing violence, in Iraq as well as in Israel and Palestine, fuels the fires of radicalism.</p> <p>Palestinian suffering has become a worldwide recruiting poster for extremist terror.</p> | <p>the war against terror.</p> <p>the fight against poverty, want and terror.</p> <p>Jordan have also experienced the high price of terror this year.</p> <p>the global alliance against terror</p> <p>to take the lead against extremism and terrorism</p> <p>To end terror, to find global peace,</p> <p>Palestinian suffering has become a worldwide recruiting poster for extremist terror.</p> <p>In the war on terror, our countries have a strong strategic relationship</p> <p>, as we fight against terror, we are also working to deliver on something better</p> <p>nd unite in the face of terrorism.</p> <p>setting the priorities in the war on terror.</p> <p>That means rejecting terror,</p> <p>we have taken the lead against extremism and terrorism.</p> <p>As we fight against terror, we are also working to deliver on something better</p> <p>US Secretary of State Colin Powell said, "We fight terrorism because we must,</p> <p>But a new constellation of challenges has arisen: weapons of mass destruction ... global terrorism</p> | <p>a country, proud of its Islamic heritage, and facing the future with confidence.</p> <p>Central to Jordan's identity is that of an Arab and Islamic country.</p> <p>will tell you that Islam teaches intolerance, condones – even demands violence</p> <p>Islam has called on its faithful to lead lives of peace and tolerance.</p> <p>It is also untrue that Islam forbids its believers from engaging constructively in the modern world.</p> <p>The Golden Age of Islam was built upon a rationalist, liberal tradition, and it created a thriving, multi-ethnic civilisation. Islamic scholars set milestones in medicine, astronomy, science and social justice that paved the way for the European Renaissance.</p> <p>Yet the age-old, positive traditions of Islam never died.</p> <p>Jordan's Islamic values would still make us want to take the lead against extremism and terrorism.</p> <p>the united belief of Judaism, Christianity, and Islam – took root and spread across the world.</p> <p>Central to this heritage is Jordan's identity as an Islamic nation.</p> <p>concern for the oppressed;</p> | <p><b>Collocations</b></p>    |

|                                                                                                                                                                                                                                                                                                                                                                                                                                                                                                                                                                                                                                                                                                                                                                                                                                                                                                                                                                                                                                                                                                                                                                                                                                     |                                                                                                                                                                                                                                                                                                                                                                                                                                                                                                                                                                                                                                                                                                                                                                                                                                                                                                                                                                                                                                                                                                                                                                                                                                    |                                                                                                                                                                                                                                                                                                                                                                                                                                                                                                                                                                                                                                                                                                                                                                                                                                                                                                                                                                                                                                                                                                                                                                                                                                                                                                                                                                                                                                                                                       |                                                                                                                                                                                                                                                                                                                                                                                                                                                                                                                                                                                                                                                                                                                                                                                                                                                                                                                                                                                                                                                                                                                  |                                                                                                                                                                                                                                                                                                                                                                                                                                                                                                                                                                                                                                                                                                                                                                                                                                                                                                                                                                                                                                                                                                                                                                                                                                                                                                                                                                                                                                                 |  |
|-------------------------------------------------------------------------------------------------------------------------------------------------------------------------------------------------------------------------------------------------------------------------------------------------------------------------------------------------------------------------------------------------------------------------------------------------------------------------------------------------------------------------------------------------------------------------------------------------------------------------------------------------------------------------------------------------------------------------------------------------------------------------------------------------------------------------------------------------------------------------------------------------------------------------------------------------------------------------------------------------------------------------------------------------------------------------------------------------------------------------------------------------------------------------------------------------------------------------------------|------------------------------------------------------------------------------------------------------------------------------------------------------------------------------------------------------------------------------------------------------------------------------------------------------------------------------------------------------------------------------------------------------------------------------------------------------------------------------------------------------------------------------------------------------------------------------------------------------------------------------------------------------------------------------------------------------------------------------------------------------------------------------------------------------------------------------------------------------------------------------------------------------------------------------------------------------------------------------------------------------------------------------------------------------------------------------------------------------------------------------------------------------------------------------------------------------------------------------------|---------------------------------------------------------------------------------------------------------------------------------------------------------------------------------------------------------------------------------------------------------------------------------------------------------------------------------------------------------------------------------------------------------------------------------------------------------------------------------------------------------------------------------------------------------------------------------------------------------------------------------------------------------------------------------------------------------------------------------------------------------------------------------------------------------------------------------------------------------------------------------------------------------------------------------------------------------------------------------------------------------------------------------------------------------------------------------------------------------------------------------------------------------------------------------------------------------------------------------------------------------------------------------------------------------------------------------------------------------------------------------------------------------------------------------------------------------------------------------------|------------------------------------------------------------------------------------------------------------------------------------------------------------------------------------------------------------------------------------------------------------------------------------------------------------------------------------------------------------------------------------------------------------------------------------------------------------------------------------------------------------------------------------------------------------------------------------------------------------------------------------------------------------------------------------------------------------------------------------------------------------------------------------------------------------------------------------------------------------------------------------------------------------------------------------------------------------------------------------------------------------------------------------------------------------------------------------------------------------------|-------------------------------------------------------------------------------------------------------------------------------------------------------------------------------------------------------------------------------------------------------------------------------------------------------------------------------------------------------------------------------------------------------------------------------------------------------------------------------------------------------------------------------------------------------------------------------------------------------------------------------------------------------------------------------------------------------------------------------------------------------------------------------------------------------------------------------------------------------------------------------------------------------------------------------------------------------------------------------------------------------------------------------------------------------------------------------------------------------------------------------------------------------------------------------------------------------------------------------------------------------------------------------------------------------------------------------------------------------------------------------------------------------------------------------------------------|--|
| <p>Ongoing violence, in Iraq as well as in Israel and Palestine, fuels the fires of radicalism.</p> <p>the Arab-Israeli conflict.</p> <p>Palestinians and Israelis affirmed their sincere intent to pursue the road to peace.</p> <p>To the Israelis, the roadmap offers collective security guarantees by all Arabs</p> <p>the roadmap on an irreversible course to Palestinian statehood, Israeli security, and prosperity for all in the Middle East.</p> <p>the central crisis in our region – the Arab-Israeli conflict.</p> <p>Palestinians and Israelis affirmed their sincere intent to pursue the road to peace.</p> <p>To the Israelis, the roadmap offers collective security guarantees by all Arabs</p> <p>the long and hateful cycle of violence between Israelis and Palestinians.</p> <p>a just and lasting solution: two secure states, Israeli withdrawal from the Palestinian territories and dismantling of settlements,</p> <p>The international community cannot afford to let the collective suicide of Palestinians and Israelis feed rage and violence in the region and the world.</p> <p>It would be in tune with the desires of the overwhelming majority of Israelis.</p> <p>Let me begin with the</p> | <p>Over sixty per cent of the population of the Arab World is under 25 years of age.</p> <p>the Arab world.</p> <p>with more than half of the Arab population under the age of 18,</p> <p>Recently, the Arab Business Council of the World Economic Forum</p> <p>The Arab Business Council is also building bridges</p> <p>both parties and the international community recognised the path set forth by the Arab Summit resolution and the Road Map.</p> <p>It would garner the support of the Arab states and Europe for the Palestinian leadership</p> <p>in all these ways the Arab world is engaged in a great enterprise.</p> <p>Let me begin with the core challenge: ending the Arab-Israeli conflict.</p> <p>As you know, the Arab League collectively endorsed this proposal with full normalisation between the Arab countries and Israel.</p> <p>Reports show that per capita income has actually shrunk in the Arab countries during the last 20 years. One of every five Arabs lives on less than \$2 a day, and in the labour force,</p> <p>t takes a collective Arab effort to address these issues.</p> <p>within the family of Arab and Middle Eastern nations.</p> <p>We are witnessing changes in the Arab</p> | <p>Palestinians and Israelis affirmed their sincere intent to pursue the road to peace.</p> <p>To the Palestinians, it offers an end to the occupation.</p> <p>Palestinians and Israelis affirmed their sincere intent to pursue the road to peace.</p> <p>To the Palestinians, it offers an end to the occupation; a viable, independent state.</p> <p>two secure states, Israeli withdrawal from the Palestinian territories and dismantling of settlements</p> <p>the collective suicide of Palestinians and Israelis feed rage and violence in the region and the world.</p> <p>It would garner the support of the Arab states and Europe for the Palestinian leadership.</p> <p>an independent Palestinian state lives in peaceful coexistence alongside a secure and recognised Israel within the 1967 frontiers.</p> <p>Mainstream Palestinians accept that the refugees' right of return must not undermine the demographic balance of Israel.</p> <p>A Palestinian capital in Eastern Jerusalem would be matched by an Israeli capital in Western Jerusalem.</p> <p>For us in Jordan, the crisis in Palestine is very near.</p> <p>Such an alliance can secure the future of Palestine and Israel, bolster peace and stability in the Middle East.</p> <p>For Israel, it's time to end the occupation and stop the futile effort to humble Palestinians into submission.</p> <p>For the Palestinian leadership, it is time to act responsibly for peace and reform their</p> | <p>the international community in our common fight against terrorism</p> <p>to create hope and end despair – to defeat terror and renew peace.</p> <p>. It is, indeed, a terrible and challenging time for all of us who despise terror.</p> <p>all Jordanians condemn strongly these heinous terrorist acts against innocents and children.</p> <p>The great evil of terrorism.</p> <p>To end regional conflict; to unite against terror; to heal economic and cultural divides.</p> <p>When young people are not threatened by terror and hatred</p> <p>we must work together against terror and to bridge economic and cultural divides.</p> <p>I speak to you tonight on behalf of millions of Jordanians, who seek global peace in defiance of terror and hatred.</p> <p>Jordanians from all walks of life marched together to defy terror and assert Islam's true values.</p> <p>when Jordanians defied the terrorists;</p> <p>Muslim and Christian, arm in arm, saying no to terror; he dangerous combination of new technology, terrorism and the drastic consequences of economic underdevelopment.</p> | <p>respect for men and women alike. From Islam's earliest history, these are the values that enriched our culture,</p> <p>I know that this is not the description of Islam you will hear from extremists, or from those who hate Islam. But they are wrong</p> <p>This leads me to say a few words about the Islamic faith that is central to Jordan's identity.</p> <p>Recent years have brought new dialogue in the West about the nature of Islam.</p> <p>From its earliest days, Islam pioneered a path that respected diversity and tolerance,promoted new ideas and empowered its people. This is the true Islam, and these values a are why Jordanians speak out against hatred,</p> <p>the united belief of Judaism, Christianity and Islam took root and spread across the world.</p> <p>And may I also say these are the deepest values of Islam.</p> <p>Indeed, Islam's core values are essential features of healthy, stable democracy everywhere.</p> <p>In these efforts and others, Jordan is showing what a home-grown Arab-Islamic model can accomplish.</p> <p>It is a heritage that created the golden age of Islam – a multi-ethnic civilisation that made historic advances in scholarship and civic development.</p> <p>this Arab Islamic heritage is driving a new era of progress in the Middle East.</p> <p>But we believe Jordan's path can also show others what a home-grown Arab-Islamic model can accomplish.</p> |  |
|-------------------------------------------------------------------------------------------------------------------------------------------------------------------------------------------------------------------------------------------------------------------------------------------------------------------------------------------------------------------------------------------------------------------------------------------------------------------------------------------------------------------------------------------------------------------------------------------------------------------------------------------------------------------------------------------------------------------------------------------------------------------------------------------------------------------------------------------------------------------------------------------------------------------------------------------------------------------------------------------------------------------------------------------------------------------------------------------------------------------------------------------------------------------------------------------------------------------------------------|------------------------------------------------------------------------------------------------------------------------------------------------------------------------------------------------------------------------------------------------------------------------------------------------------------------------------------------------------------------------------------------------------------------------------------------------------------------------------------------------------------------------------------------------------------------------------------------------------------------------------------------------------------------------------------------------------------------------------------------------------------------------------------------------------------------------------------------------------------------------------------------------------------------------------------------------------------------------------------------------------------------------------------------------------------------------------------------------------------------------------------------------------------------------------------------------------------------------------------|---------------------------------------------------------------------------------------------------------------------------------------------------------------------------------------------------------------------------------------------------------------------------------------------------------------------------------------------------------------------------------------------------------------------------------------------------------------------------------------------------------------------------------------------------------------------------------------------------------------------------------------------------------------------------------------------------------------------------------------------------------------------------------------------------------------------------------------------------------------------------------------------------------------------------------------------------------------------------------------------------------------------------------------------------------------------------------------------------------------------------------------------------------------------------------------------------------------------------------------------------------------------------------------------------------------------------------------------------------------------------------------------------------------------------------------------------------------------------------------|------------------------------------------------------------------------------------------------------------------------------------------------------------------------------------------------------------------------------------------------------------------------------------------------------------------------------------------------------------------------------------------------------------------------------------------------------------------------------------------------------------------------------------------------------------------------------------------------------------------------------------------------------------------------------------------------------------------------------------------------------------------------------------------------------------------------------------------------------------------------------------------------------------------------------------------------------------------------------------------------------------------------------------------------------------------------------------------------------------------|-------------------------------------------------------------------------------------------------------------------------------------------------------------------------------------------------------------------------------------------------------------------------------------------------------------------------------------------------------------------------------------------------------------------------------------------------------------------------------------------------------------------------------------------------------------------------------------------------------------------------------------------------------------------------------------------------------------------------------------------------------------------------------------------------------------------------------------------------------------------------------------------------------------------------------------------------------------------------------------------------------------------------------------------------------------------------------------------------------------------------------------------------------------------------------------------------------------------------------------------------------------------------------------------------------------------------------------------------------------------------------------------------------------------------------------------------|--|

|                                                                                                                                                                                                                                                                                                                                                                                                                                                                                                                                                                                                                                                                                                                                                                                                                                                                                                                                                                                                                                                                                                                                                                                                                                                                                                                        |                                                                                                                                                                                                                                                                                                                                                                                                                                                                                                                                                                                                                                                                                                                                                                                                                                                                                                                                                                                                                                                                                                                                                                                                                                             |                                                                                                                                                                                                                                                                                                                                                                                                                                                                                                                                                                                                                                                                                                                                                                                                                                                                                                                                                                                                                                                                                                                                                                                                                                                                                                                                                                                                                                          |  |                                                                                                                                                                                                                                                                                                                                                                                                                                                                                                                                                                                                                                                                                                                                                                                                                                                                                                                                                                                                                                                                                                                                                                                                                                                                                                                                                                                  |  |
|------------------------------------------------------------------------------------------------------------------------------------------------------------------------------------------------------------------------------------------------------------------------------------------------------------------------------------------------------------------------------------------------------------------------------------------------------------------------------------------------------------------------------------------------------------------------------------------------------------------------------------------------------------------------------------------------------------------------------------------------------------------------------------------------------------------------------------------------------------------------------------------------------------------------------------------------------------------------------------------------------------------------------------------------------------------------------------------------------------------------------------------------------------------------------------------------------------------------------------------------------------------------------------------------------------------------|---------------------------------------------------------------------------------------------------------------------------------------------------------------------------------------------------------------------------------------------------------------------------------------------------------------------------------------------------------------------------------------------------------------------------------------------------------------------------------------------------------------------------------------------------------------------------------------------------------------------------------------------------------------------------------------------------------------------------------------------------------------------------------------------------------------------------------------------------------------------------------------------------------------------------------------------------------------------------------------------------------------------------------------------------------------------------------------------------------------------------------------------------------------------------------------------------------------------------------------------|------------------------------------------------------------------------------------------------------------------------------------------------------------------------------------------------------------------------------------------------------------------------------------------------------------------------------------------------------------------------------------------------------------------------------------------------------------------------------------------------------------------------------------------------------------------------------------------------------------------------------------------------------------------------------------------------------------------------------------------------------------------------------------------------------------------------------------------------------------------------------------------------------------------------------------------------------------------------------------------------------------------------------------------------------------------------------------------------------------------------------------------------------------------------------------------------------------------------------------------------------------------------------------------------------------------------------------------------------------------------------------------------------------------------------------------|--|----------------------------------------------------------------------------------------------------------------------------------------------------------------------------------------------------------------------------------------------------------------------------------------------------------------------------------------------------------------------------------------------------------------------------------------------------------------------------------------------------------------------------------------------------------------------------------------------------------------------------------------------------------------------------------------------------------------------------------------------------------------------------------------------------------------------------------------------------------------------------------------------------------------------------------------------------------------------------------------------------------------------------------------------------------------------------------------------------------------------------------------------------------------------------------------------------------------------------------------------------------------------------------------------------------------------------------------------------------------------------------|--|
| <p>core challenge: ending the Arab-Israeli conflict.</p> <p>an independent Palestinian state lives in peaceful coexistence alongside a secure and recognised Israel within the 1967 frontiers</p> <p>with full normalisation between the Arab countries and Israel.</p> <p>Mainstream Palestinians accept that the refugees' right of return must not undermine the demographic balance of Israel. Mainstream Israelis understand that they cannot be occupiers of another people.</p> <p>A Palestinian capital in Eastern Jerusalem would be matched by an Israeli capital in Western Jerusalem.</p> <p>Such an alliance can secure the future of Palestine and Israel, bolster peace and stability in the Middle East</p> <p>For Israel, it's time to end the occupation and stop the futile effort to humble Palestinians into submission.</p> <p>For both parties it is time to listen to the people, Israelis and the Palestinians, who tell us so clearly: "Give us security, peace and justice." Israel needs to take the risk for a peace that would create two states, living side by side</p> <p>We are witnessing changes in the Arab world that are removing all strategic security threats to Israel.</p> <p>The Arab peace declaration commits all Arab countries to accept peace with Israel, and a</p> | <p>world that are removing all strategic security threats to Israel. The Arab peace declaration commits all Arab countries to accept peace with Israel,</p> <p>the Arab-Israeli conflict has cast its dark clouds over regional development. Jordan is the first Arab country to sign a free trade area agreement</p> <p>and the Arab Initiative, endorsed by the Beirut Arab League Summit.</p> <p>Today, most Arabs agree that reform is vital. Arabs also agree that for reform to succeed, it must emerge from within our own societies.</p> <p>They are the historic values that drove the ancient Arab world's humanism, and its pioneering civic development.</p> <p>I am pleased that in Tunis last month, the Arab League concurred in the need for reform.</p> <p>This means a just, lasting, and comprehensive settlement to the Arab-Israeli conflict.</p> <p>the Arab-Israeli conflict remains the central hurdle to peace and progress in my region. In these efforts and others, Jordan is showing what a home-grown Arab-Islamic model can accomplish.</p> <p>At the Anglo-Arab Organisation</p> <p>Anglo-Arab friendship – for encouraging young Arabs to be great citizens - and for promoting an important dialogue.</p> | <p>political institutions.</p> <p>Israelis and the Palestinians, who tell us so clearly: "Give us security, peace and justice."</p> <p>The United States needs to clearly and explicitly commit to a Palestinian state.</p> <p>They predict the collapse of the Palestinian Authority and an end to the prospect of delivering a two-state solution.</p> <p>for an end to the occupation and the creation of a viable, independent Palestinian state.</p> <p>This is the future that would give both Palestinians and Israelis the security and peace they need.</p> <p>a viable, sovereign, and independent Palestinian state on the basis of the 1967 borders is also in Jordan's national interest.</p> <p>ordan is ready to do its part in assisting the Palestinian Authority to rebuild its capability and assume full control of the security situation.</p> <p>A free, sovereign, viable, democratic and contiguous Palestine. Security for Israel to live in peace with its neighbours.</p> <p>Israelis and Palestinians, who tell us so clearly: "Give us security, peace and justice." That means a free, sovereign, viable, democratic and contiguous Palestine.</p> <p>For generations, Palestinian suffering has reaped frustration and anger.</p> <p>A free, sovereign, viable, democratic and contiguous Palestine.</p> <p>in Palestine, Israel, Iraq and elsewhere: "Global justice is real – the system can work."</p> |  | <p>Indeed, Russia was represented at last year's global Islamic Conference by no less than President Putin.</p> <p>In this regard, I applaud President Putin and so many of you, for rejecting Islamophobia.</p> <p>For our part, in the Islamic world, I can tell you that extremists will not silence the real Islam.</p> <p>This is what a home-grown Arab-Islamic model can accomplish.</p> <p>It takes inspiration and power from our society's deepest Arab-Islamic values: respect for human dignity, global good citizenship, tolerance and peace.</p> <p>And we have spoken out very clearly about these values, in our worldwide Amman Message about the true Islam.</p> <p>It restates the core values of Islam: peace, tolerance and the essential unity of the human race. Islam calls on believers to reach out to others with respect and to be involved in the progress of the modern world.</p> <p>Theirs is a profoundly anti-Islamic agenda. Only by distorting and abandoning the true teachings of Islam, can anyone kill innocent civilians.</p> <p>We have followed this up with concrete measures to affirm Islam's central, moderate core.</p> <p>the three monotheistic religions: Judaism, Christianity and Islam - to which the majority of people in the world belong today.</p> <p>Another way is by maintaining a respectful dialogue between</p> |  |
|------------------------------------------------------------------------------------------------------------------------------------------------------------------------------------------------------------------------------------------------------------------------------------------------------------------------------------------------------------------------------------------------------------------------------------------------------------------------------------------------------------------------------------------------------------------------------------------------------------------------------------------------------------------------------------------------------------------------------------------------------------------------------------------------------------------------------------------------------------------------------------------------------------------------------------------------------------------------------------------------------------------------------------------------------------------------------------------------------------------------------------------------------------------------------------------------------------------------------------------------------------------------------------------------------------------------|---------------------------------------------------------------------------------------------------------------------------------------------------------------------------------------------------------------------------------------------------------------------------------------------------------------------------------------------------------------------------------------------------------------------------------------------------------------------------------------------------------------------------------------------------------------------------------------------------------------------------------------------------------------------------------------------------------------------------------------------------------------------------------------------------------------------------------------------------------------------------------------------------------------------------------------------------------------------------------------------------------------------------------------------------------------------------------------------------------------------------------------------------------------------------------------------------------------------------------------------|------------------------------------------------------------------------------------------------------------------------------------------------------------------------------------------------------------------------------------------------------------------------------------------------------------------------------------------------------------------------------------------------------------------------------------------------------------------------------------------------------------------------------------------------------------------------------------------------------------------------------------------------------------------------------------------------------------------------------------------------------------------------------------------------------------------------------------------------------------------------------------------------------------------------------------------------------------------------------------------------------------------------------------------------------------------------------------------------------------------------------------------------------------------------------------------------------------------------------------------------------------------------------------------------------------------------------------------------------------------------------------------------------------------------------------------|--|----------------------------------------------------------------------------------------------------------------------------------------------------------------------------------------------------------------------------------------------------------------------------------------------------------------------------------------------------------------------------------------------------------------------------------------------------------------------------------------------------------------------------------------------------------------------------------------------------------------------------------------------------------------------------------------------------------------------------------------------------------------------------------------------------------------------------------------------------------------------------------------------------------------------------------------------------------------------------------------------------------------------------------------------------------------------------------------------------------------------------------------------------------------------------------------------------------------------------------------------------------------------------------------------------------------------------------------------------------------------------------|--|

|                                                                                                                                                                                                                                                                                                                                                                                                                                                                                                                                                                                                                                                                                                                                                                                                                                                                                                                                                                                                                                                                                                                                                                                                                                               |                                                                                                                                                                                                                                                                                                                                                                                                                                                                                                                                                                                                                                                                                                                                                                                                                                                                                                                                                                                                                                                                                                                                                                    |                                                                                                                                                                                                                                                                                                                                                                                                                                                                                                                                                                                                                                                                                                                                                                                                                                                                                                                                                                                                                                                                                                                                                                                                                                                                                                                                                                                                                                                                                                     |  |                                                                                                                                                                                                                                                                                                                                                                                                                                                                                                                                                                                                                                                                                                                                                                                                                                                                                                                                                                                                                                                                                                                                                                                                                                                                                                                                                |  |
|-----------------------------------------------------------------------------------------------------------------------------------------------------------------------------------------------------------------------------------------------------------------------------------------------------------------------------------------------------------------------------------------------------------------------------------------------------------------------------------------------------------------------------------------------------------------------------------------------------------------------------------------------------------------------------------------------------------------------------------------------------------------------------------------------------------------------------------------------------------------------------------------------------------------------------------------------------------------------------------------------------------------------------------------------------------------------------------------------------------------------------------------------------------------------------------------------------------------------------------------------|--------------------------------------------------------------------------------------------------------------------------------------------------------------------------------------------------------------------------------------------------------------------------------------------------------------------------------------------------------------------------------------------------------------------------------------------------------------------------------------------------------------------------------------------------------------------------------------------------------------------------------------------------------------------------------------------------------------------------------------------------------------------------------------------------------------------------------------------------------------------------------------------------------------------------------------------------------------------------------------------------------------------------------------------------------------------------------------------------------------------------------------------------------------------|-----------------------------------------------------------------------------------------------------------------------------------------------------------------------------------------------------------------------------------------------------------------------------------------------------------------------------------------------------------------------------------------------------------------------------------------------------------------------------------------------------------------------------------------------------------------------------------------------------------------------------------------------------------------------------------------------------------------------------------------------------------------------------------------------------------------------------------------------------------------------------------------------------------------------------------------------------------------------------------------------------------------------------------------------------------------------------------------------------------------------------------------------------------------------------------------------------------------------------------------------------------------------------------------------------------------------------------------------------------------------------------------------------------------------------------------------------------------------------------------------------|--|------------------------------------------------------------------------------------------------------------------------------------------------------------------------------------------------------------------------------------------------------------------------------------------------------------------------------------------------------------------------------------------------------------------------------------------------------------------------------------------------------------------------------------------------------------------------------------------------------------------------------------------------------------------------------------------------------------------------------------------------------------------------------------------------------------------------------------------------------------------------------------------------------------------------------------------------------------------------------------------------------------------------------------------------------------------------------------------------------------------------------------------------------------------------------------------------------------------------------------------------------------------------------------------------------------------------------------------------|--|
| <p>balanced lasting solution to the conflict.</p> <p>It also provides for collective security guarantees for Israel, for an end to the occupation and the creation of a viable, independent Palestinian state.</p> <p>This is the future that would give both Palestinians and Israelis the security and peace they need.</p> <p>For far too long, the Arab-Israeli conflict has cast its dark clouds over regional development.</p> <p>We feel that any unilateral Israeli withdrawal from Gaza and the West Bank should be part of the road map,</p> <p>This means a just, lasting, and comprehensive settlement to the Arab-Israeli conflict.</p> <p>Security for Israel to live in peace with its neighbours.</p> <p>It is time to listen to the people, Israelis and Palestinians, who tell us so clearly: “Give us security, peace and justice.”</p> <p>And it means security for Israel to live in peace with its neighbours.</p> <p>International support is essential to resolving the core Arab-Israeli conflict.</p> <p>The Arab-Israeli conflict remains a huge barrier to stability and progress in my region, and the world.</p> <p>Real security for Israel to live in peace with its neighbours.</p> <p>Let us send a new</p> | <p>The Anglo-Arab Organisation</p> <p>Never has it been more urgent that the British and Arab people reach out,</p> <p>In 1154, the Arab geographer, Al Idrisi, described a mysterious northern place called Angleterre.</p> <p>I hope, we helped others see something of the proud heritage of the Arab world.</p> <p>humanistic values of the Arab world.</p> <p>And today, this Arab Islamic heritage is driving a new era of progress in the Middle East.</p> <p>Today, most Arabs agree that reform is vital.</p> <p>In the Arab world, our future is our own to shape. But our friends here in Britain and elsewhere have a vital contribution to make. International support is essential to resolving the core Arab-Israeli conflict.</p> <p>his is the hope, indeed the right, of men and women throughout the Arab world.</p> <p>The Arab people will not accept measures that are imposed by outsiders,</p> <p>The Arab-Israeli conflict remains a huge barrier to stability and progress in my region,</p> <p>The Arab world is committed to a balanced and lasting solution to the conflict.</p> <p>The recent UNDP report ranked Jordan first in</p> | <p>leading nations committed to helping the Palestinians create the security and economic opportunity that progress requires.</p> <p>A sovereign, viable Palestinian state – one that gives its people the dignity of freedom and provides a future of hope.</p> <p>The basic goals are shared by people on both sides: justice for the Palestinians. Security for the Israelis.</p> <p>. For Palestinians, for Israelis: a lasting, just solution; two states, living beside each other in peace and security,</p> <p>a sovereign, viable Palestinian state, security for Israel, and a comprehensive settlement that can bring regional reconciliation.</p> <p>a lasting, just solution to the Arab-Israeli conflict, with two states, a sovereign, viable Palestine and a secure Israel;</p> <p>The Palestinian elections last week were an important step in the history of the Palestinian people.</p> <p>For years, the Palestinian people have expressed their desire for peace, and their respect for the legitimacy of international resolutions.</p> <p>Both peoples, Palestinian and Israeli, are fed up with violence.</p> <p>Establishing a viable, sovereign Palestinian state, alongside a secure Israel, is the only way to put an end to violence and extremism.</p> <p>The Palestinian-Israeli peace process is also at a critical point.</p> <p>And the only guarantee for peace is the two-state solution: a viable, sovereign Palestinian state, living alongside a secure</p> |  | <p>Christianity and Islam, the two largest religions in the world.</p> <p>Both Islam and Christianity teach belief in and devotion to, One God, and love for our fellow human beings.</p> <p>Jordan's commitment to peace, tolerance and justice. They are also at the heart of Jordan's traditional Islamic reaffirmation. Reaffirming traditional Islam consolidates the middle ground of our religion,</p> <p>rejecting extremist hatred and violence as profound distortions of Islam.</p> <p>to defy terror and assert Islam's true values.</p> <p>an explanation of the true nature of Islam and a call to peaceful coexistence among all nations.</p> <p>They represented all eight traditional schools of Islamic Jurisprudence from the three main branches of Islam – Sunni, Shi'i and Ibadhi. the world's leading Islamic authorities.</p> <p>the validity of all eight schools of jurisprudence and of traditional Islamic creeds and practices.</p> <p>extremist fatwas justifying violence are in clear violation of Islam's teachings.</p> <p>the Islamic Conference.</p> <p>The Islamic reaffirmation is a Muslim initiative.</p> <p>The reality is there are powerful bonds among Islam, Christianity, and Judaism</p> <p>My religion, Islam, is why traditional Muslims decisively reject extremist violence and hatred.</p> |  |
|-----------------------------------------------------------------------------------------------------------------------------------------------------------------------------------------------------------------------------------------------------------------------------------------------------------------------------------------------------------------------------------------------------------------------------------------------------------------------------------------------------------------------------------------------------------------------------------------------------------------------------------------------------------------------------------------------------------------------------------------------------------------------------------------------------------------------------------------------------------------------------------------------------------------------------------------------------------------------------------------------------------------------------------------------------------------------------------------------------------------------------------------------------------------------------------------------------------------------------------------------|--------------------------------------------------------------------------------------------------------------------------------------------------------------------------------------------------------------------------------------------------------------------------------------------------------------------------------------------------------------------------------------------------------------------------------------------------------------------------------------------------------------------------------------------------------------------------------------------------------------------------------------------------------------------------------------------------------------------------------------------------------------------------------------------------------------------------------------------------------------------------------------------------------------------------------------------------------------------------------------------------------------------------------------------------------------------------------------------------------------------------------------------------------------------|-----------------------------------------------------------------------------------------------------------------------------------------------------------------------------------------------------------------------------------------------------------------------------------------------------------------------------------------------------------------------------------------------------------------------------------------------------------------------------------------------------------------------------------------------------------------------------------------------------------------------------------------------------------------------------------------------------------------------------------------------------------------------------------------------------------------------------------------------------------------------------------------------------------------------------------------------------------------------------------------------------------------------------------------------------------------------------------------------------------------------------------------------------------------------------------------------------------------------------------------------------------------------------------------------------------------------------------------------------------------------------------------------------------------------------------------------------------------------------------------------------|--|------------------------------------------------------------------------------------------------------------------------------------------------------------------------------------------------------------------------------------------------------------------------------------------------------------------------------------------------------------------------------------------------------------------------------------------------------------------------------------------------------------------------------------------------------------------------------------------------------------------------------------------------------------------------------------------------------------------------------------------------------------------------------------------------------------------------------------------------------------------------------------------------------------------------------------------------------------------------------------------------------------------------------------------------------------------------------------------------------------------------------------------------------------------------------------------------------------------------------------------------------------------------------------------------------------------------------------------------|--|



|                                                                                                                                                                                                                                                                                                                                                                                                                                                                                                                                                                                                                                                                                                                                                                                                                                                                                                                                                                                                                                                                                                                                                                                                                                                                                                                            |                                                                                                                                                                                                                                                                                                                                                                                                                                                                                                                                                                                                                                                                                                                                                                                                                                                                                                                                                                                                                                                                                                                                                                                                                                       |                                                                                                                                                                                                                                                                                                                                                                                                                                                                                                                                                                                                                                                                                                                                                                                                                                                                                                                                                                                                                                                                                                                                                                                                                                                                                                                |                                                                                                                                                                                                                                                                                                                                                                                                                                                                                                                                                                                                                                                                                                                                                                                                                                                                                                                                                                                                                                                                                                                                                                                                                                                                                                                                                                                                      |  |
|----------------------------------------------------------------------------------------------------------------------------------------------------------------------------------------------------------------------------------------------------------------------------------------------------------------------------------------------------------------------------------------------------------------------------------------------------------------------------------------------------------------------------------------------------------------------------------------------------------------------------------------------------------------------------------------------------------------------------------------------------------------------------------------------------------------------------------------------------------------------------------------------------------------------------------------------------------------------------------------------------------------------------------------------------------------------------------------------------------------------------------------------------------------------------------------------------------------------------------------------------------------------------------------------------------------------------|---------------------------------------------------------------------------------------------------------------------------------------------------------------------------------------------------------------------------------------------------------------------------------------------------------------------------------------------------------------------------------------------------------------------------------------------------------------------------------------------------------------------------------------------------------------------------------------------------------------------------------------------------------------------------------------------------------------------------------------------------------------------------------------------------------------------------------------------------------------------------------------------------------------------------------------------------------------------------------------------------------------------------------------------------------------------------------------------------------------------------------------------------------------------------------------------------------------------------------------|----------------------------------------------------------------------------------------------------------------------------------------------------------------------------------------------------------------------------------------------------------------------------------------------------------------------------------------------------------------------------------------------------------------------------------------------------------------------------------------------------------------------------------------------------------------------------------------------------------------------------------------------------------------------------------------------------------------------------------------------------------------------------------------------------------------------------------------------------------------------------------------------------------------------------------------------------------------------------------------------------------------------------------------------------------------------------------------------------------------------------------------------------------------------------------------------------------------------------------------------------------------------------------------------------------------|------------------------------------------------------------------------------------------------------------------------------------------------------------------------------------------------------------------------------------------------------------------------------------------------------------------------------------------------------------------------------------------------------------------------------------------------------------------------------------------------------------------------------------------------------------------------------------------------------------------------------------------------------------------------------------------------------------------------------------------------------------------------------------------------------------------------------------------------------------------------------------------------------------------------------------------------------------------------------------------------------------------------------------------------------------------------------------------------------------------------------------------------------------------------------------------------------------------------------------------------------------------------------------------------------------------------------------------------------------------------------------------------------|--|
| <p>message to young people – in Palestine, Israel, Iraq and elsewhere: “Global justice is real – the system can work.”</p> <p>Nowhere is that support more important than on the issue of Arab-Israeli peace.</p> <p>Security guarantees for Israel, based on regional acceptance and peace, from sea to sea</p> <p>: justice for the Palestinians. Security for the Israelis. Two states living side by side based on international legality.</p> <p>For Palestinians, for Israelis: a lasting, just solution; two states, living beside each other in peace and security, a sovereign, viable Palestinian state, security for Israel, and a comprehensive settlement that can bring regional reconciliation.</p> <p>in supporting peace: a lasting, just solution to the Arab-Israeli conflict, with two states, a sovereign, viable Palestine and a secure Israel; a stable, unified Iraq with a rebuilt economy and an inclusive civil society.</p> <p>Palestinian and Israeli, are fed up with violence.</p> <p>Establishing a viable, sovereign Palestinian state, alongside a secure Israel, is the only way to put an end to violence and extremism.</p> <p>The Palestinian-Israeli peace process is also at a critical point.</p> <p>a viable, sovereign Palestinian state, living alongside a secure Israel.</p> | <p>educational reforms in the Arab world.</p> <p>This is what a home-grown Arab-Islamic model can accomplish. This is how we will achieve the peace and prosperity that the Arab people so urgently need and deserve.</p> <p>And nearly half the population of today's Arab world had not yet been born.</p> <p>But for those of us in the Arab world, who believe in the future, who believe in our people</p> <p>It takes inspiration and power from our society's deepest Arab-Islamic values: The Arab world is writing a new future; the pen is in our own hands.</p> <p>Nowhere is that support more important than on the issue of Arab-Israeli peace.</p> <p>Make no mistake about it: today, the enemies of a just peace are enemies of Arab progress.</p> <p>It is a positive vision put forward by Arab nations in Beirut three years ago from Morocco's Atlantic coast to the United Arab Emirates' Gulf waters.</p> <p>I was privileged to be here in 1999 for the dedication of the Centre for Contemporary Arab Studies.</p> <p>In the ninth century, a remarkable institution opened its doors in the Arab world: the Bayt Al Hikma, the House of Wisdom.</p> <p>My friends, the Arab world will not be set back.</p> | <p>Israel.</p> <p>Palestine, and Israel whose futures have been derailed by years of conflict.</p> <p>Palestinians must be empowered to shape a future of hope in a viable, sovereign Palestine.</p> <p>a sovereign, viable, and independent Palestine and a process that would lead to a comprehensive settlement.</p> <p>That grievance, plain and simply, is Israeli occupation and the denial, over decades, of Palestinian rights.</p> <p>affirming Palestinian self-determination and supporting a process for peace</p> <p>the restoration of internationally recognised Palestinian rights.</p> <p>Our vision and commitment is a viable, independent Palestinian state, living side-by-side with a secure Israel.</p> <p>Under the Arab Peace Initiative, Israel's security would be guaranteed, and the occupation of Palestine would end, the Ottawa Process to bring justice for Palestinian refugees.</p> <p>the Israeli occupation of Palestinian land - more than two generations raised in violence and frustration</p> <p>he last meaningful political process between Palestinians and Israelis was so long ago .</p> <p>Millions of Palestinians are united in their dream of a sovereign, independent Palestinian state.</p> <p>one that provides a sovereign, viable, and independent</p> | <p>. It is an explanation of the true nature of Islam and a call to peaceful coexistence among all human beings.</p> <p>a declaration that invalidates extremist fatwas that violate Islamic precepts and justify violence.</p> <p>the Islamic Conference.</p> <p>The Amman Message is an all-Islamic initiative, but the road to moderation is not for Muslims alone.</p> <p>The majority of Muslims also condemn the violence that ensued as alien to the principles of Islam. And I know that many in the West also spoke out, rejecting the vilification of Islam.</p> <p>t is an explanation of the true nature of Islam and a call to peaceful coexistence among all human beings.</p> <p>at every level of society, have raised their voices to restate Islam's commitment to respect for others.</p> <p>a gathering of some of the most learned Islamic scholars in the world met to carry the Amman Message forward.</p> <p>Their declaration strikes at the roots of extremism by denying its Islamic legitimacy.</p> <p>the international Organisation of the Islamic Conference</p> <p>articulating Islam's abiding social values: respect for others; social justice; peace.</p> <p>by the way, at least six religions, with Islam as the second largest – all forming a diverse community that cooperates under the rule of law for mutual benefit.</p> <p>the Amman Message, with</p> |  |
|----------------------------------------------------------------------------------------------------------------------------------------------------------------------------------------------------------------------------------------------------------------------------------------------------------------------------------------------------------------------------------------------------------------------------------------------------------------------------------------------------------------------------------------------------------------------------------------------------------------------------------------------------------------------------------------------------------------------------------------------------------------------------------------------------------------------------------------------------------------------------------------------------------------------------------------------------------------------------------------------------------------------------------------------------------------------------------------------------------------------------------------------------------------------------------------------------------------------------------------------------------------------------------------------------------------------------|---------------------------------------------------------------------------------------------------------------------------------------------------------------------------------------------------------------------------------------------------------------------------------------------------------------------------------------------------------------------------------------------------------------------------------------------------------------------------------------------------------------------------------------------------------------------------------------------------------------------------------------------------------------------------------------------------------------------------------------------------------------------------------------------------------------------------------------------------------------------------------------------------------------------------------------------------------------------------------------------------------------------------------------------------------------------------------------------------------------------------------------------------------------------------------------------------------------------------------------|----------------------------------------------------------------------------------------------------------------------------------------------------------------------------------------------------------------------------------------------------------------------------------------------------------------------------------------------------------------------------------------------------------------------------------------------------------------------------------------------------------------------------------------------------------------------------------------------------------------------------------------------------------------------------------------------------------------------------------------------------------------------------------------------------------------------------------------------------------------------------------------------------------------------------------------------------------------------------------------------------------------------------------------------------------------------------------------------------------------------------------------------------------------------------------------------------------------------------------------------------------------------------------------------------------------|------------------------------------------------------------------------------------------------------------------------------------------------------------------------------------------------------------------------------------------------------------------------------------------------------------------------------------------------------------------------------------------------------------------------------------------------------------------------------------------------------------------------------------------------------------------------------------------------------------------------------------------------------------------------------------------------------------------------------------------------------------------------------------------------------------------------------------------------------------------------------------------------------------------------------------------------------------------------------------------------------------------------------------------------------------------------------------------------------------------------------------------------------------------------------------------------------------------------------------------------------------------------------------------------------------------------------------------------------------------------------------------------------|--|

|                                                                                                                                                                                                                                                                                                                                                                                                                                                                                                                                                                                                                                                                                                                                                                                                                                                                                                                                                                                                                                                                                                                                                                                                                                                                                                   |                                                                                                                                                                                                                                                                                                                                                                                                                                                                                                                                                                                                                                                                                                                                                                                                                                                                                                                                                                                                                                                                                                                        |                                                                                                                                                                                                                                                                                                                                                                                                                                                                                                                                                                                                                                                                                                                                                                                                                                                                                                                                                                                                                                                                                                                                                                                                                                                                                                                                          |                                                                                                                                                                                                                                                                                                                                                                                                                                                                                                                                                                                                                                                             |  |
|---------------------------------------------------------------------------------------------------------------------------------------------------------------------------------------------------------------------------------------------------------------------------------------------------------------------------------------------------------------------------------------------------------------------------------------------------------------------------------------------------------------------------------------------------------------------------------------------------------------------------------------------------------------------------------------------------------------------------------------------------------------------------------------------------------------------------------------------------------------------------------------------------------------------------------------------------------------------------------------------------------------------------------------------------------------------------------------------------------------------------------------------------------------------------------------------------------------------------------------------------------------------------------------------------|------------------------------------------------------------------------------------------------------------------------------------------------------------------------------------------------------------------------------------------------------------------------------------------------------------------------------------------------------------------------------------------------------------------------------------------------------------------------------------------------------------------------------------------------------------------------------------------------------------------------------------------------------------------------------------------------------------------------------------------------------------------------------------------------------------------------------------------------------------------------------------------------------------------------------------------------------------------------------------------------------------------------------------------------------------------------------------------------------------------------|------------------------------------------------------------------------------------------------------------------------------------------------------------------------------------------------------------------------------------------------------------------------------------------------------------------------------------------------------------------------------------------------------------------------------------------------------------------------------------------------------------------------------------------------------------------------------------------------------------------------------------------------------------------------------------------------------------------------------------------------------------------------------------------------------------------------------------------------------------------------------------------------------------------------------------------------------------------------------------------------------------------------------------------------------------------------------------------------------------------------------------------------------------------------------------------------------------------------------------------------------------------------------------------------------------------------------------------|-------------------------------------------------------------------------------------------------------------------------------------------------------------------------------------------------------------------------------------------------------------------------------------------------------------------------------------------------------------------------------------------------------------------------------------------------------------------------------------------------------------------------------------------------------------------------------------------------------------------------------------------------------------|--|
| <p>I can't stand here today without thinking about students in Iraq, Palestine, and Israel whose futures have been derailed by years of conflict.</p> <p>Israel must be part of the neighbourhood, making peace with all.</p> <p>It promised security guarantees for Israel to live in peace with its neighbours</p> <p>That grievance, plain and simply, is Israeli occupation and the denial, over decades, of Palestinian rights.</p> <p>We can only solve the Arab-Israeli conflict by addressing the issue at its core</p> <p>independent Palestinian state, living side-by-side with a secure Israel.</p> <p>Under the Arab Peace Initiative, Israel's security would be guaranteed, and the occupation of Palestine would end,</p> <p>There have now been 40 years of the Israeli occupation of Palestinian land</p> <p>The last meaningful political process between Palestinians and Israelis was so long ago that there are children in school today who were not even born then.</p> <p>Millions of Israelis look to the day they can live in peace with their neighbours.</p> <p>for all the countries of the region including Israel, and at long last, one that provides a sovereign, viable, and independent Palestine.</p> <p>And it must expedite Israel's implementation of</p> | <p>In Arabic, the Mediterranean is named Al Bahr Al Abyad Al Mutwasset</p> <p>a lasting, just solution to the Arab-Israeli conflict, with two states, a sovereign, viable Palestine and a secure Israel.</p> <p>This two-state solution was presented in the Arab peace proposal in 2002,</p> <p>especially in reaching out to the Arab world.</p> <p>At the Arab and American Action Forum.</p> <p>Young Arab Leaders are making a major impact throughout</p> <p>May I say a special word of appreciation to the Young Arab Leaders organisation,</p> <p>I hear young Arab men and women ask if America is listening to them.</p> <p>and the Arab nation is your partner, in both peace and progress.</p> <p>the Arab world has been moving forward with a vision for the future.</p> <p>Young Arab professionals are guiding innovation and delivering on performance</p> <p>And young Arab leaders are already driving the way forward.</p> <p>In 2002, the Arab states broke the old cycle with a landmark peace proposal.</p> <p>The Arab action was an unprecedented opening.</p> <p>In November, the Young</p> | <p>Palestine.</p> <p>and sees to the finish line, the establishment of a Palestinian state.</p> <p>including a withdrawal from the Palestinian territories and an end to occupation.</p> <p>An urgent first step is support for the Palestinian National Authority,</p> <p>Palestinian legitimacy must be supported in providing the governance that can fulfil people's aspirations and needs, earn public confidence, and preserve Palestinian unity.</p> <p>Fifty-seven countries for whose citizens the conflict in Palestine is the issue of their time.</p> <p>we are in the best possible position to resolve 60 years of conflict between Israel and Palestine.</p> <p>freedom and dignity for the Palestinian people.</p> <p>But I am not here today to speak only of the Israeli-Palestinian conflict.</p> <p>The continuing confinement of the Palestinians in Gaza everyday creates a greater radicalism amongst Palestinians and invites other actors within the region to operate on their behalf.</p> <p>the denial of justice and peace in Palestine.</p> <p>must begin with the resolution of the Israeli-Palestinian conflict.</p> <p>There are politicians who do not want peace with Palestinians and who reject a two-state solution.</p> <p>A homeland for Palestinians, offering hope, respect, and a future;</p> | <p>its global message about Islam and its call for tolerance, mutual respect, and human equality.</p> <p>The Amman Message is an explanation of the true nature of Islam, and a call to peaceful coexistence among all human beings. It has been supported by more than 500 of the world's leading Muslim scholars from all eight schools of Islamic jurisprudence. It has been endorsed by the Organization of the Islamic Conference, representing Muslim countries the world over.</p> <p>One such is "A Common Word", an overture from Muslim scholars to their Christian counterparts, declaring the common ground between Christianity and Islam.</p> |  |
|---------------------------------------------------------------------------------------------------------------------------------------------------------------------------------------------------------------------------------------------------------------------------------------------------------------------------------------------------------------------------------------------------------------------------------------------------------------------------------------------------------------------------------------------------------------------------------------------------------------------------------------------------------------------------------------------------------------------------------------------------------------------------------------------------------------------------------------------------------------------------------------------------------------------------------------------------------------------------------------------------------------------------------------------------------------------------------------------------------------------------------------------------------------------------------------------------------------------------------------------------------------------------------------------------|------------------------------------------------------------------------------------------------------------------------------------------------------------------------------------------------------------------------------------------------------------------------------------------------------------------------------------------------------------------------------------------------------------------------------------------------------------------------------------------------------------------------------------------------------------------------------------------------------------------------------------------------------------------------------------------------------------------------------------------------------------------------------------------------------------------------------------------------------------------------------------------------------------------------------------------------------------------------------------------------------------------------------------------------------------------------------------------------------------------------|------------------------------------------------------------------------------------------------------------------------------------------------------------------------------------------------------------------------------------------------------------------------------------------------------------------------------------------------------------------------------------------------------------------------------------------------------------------------------------------------------------------------------------------------------------------------------------------------------------------------------------------------------------------------------------------------------------------------------------------------------------------------------------------------------------------------------------------------------------------------------------------------------------------------------------------------------------------------------------------------------------------------------------------------------------------------------------------------------------------------------------------------------------------------------------------------------------------------------------------------------------------------------------------------------------------------------------------|-------------------------------------------------------------------------------------------------------------------------------------------------------------------------------------------------------------------------------------------------------------------------------------------------------------------------------------------------------------------------------------------------------------------------------------------------------------------------------------------------------------------------------------------------------------------------------------------------------------------------------------------------------------|--|

|                                                                                                                                                                                                                                                                                                                                                                                                                                                                                                                                                                                                                                                                                                                                                                                                                                                                                                                                                                                                                                                                                                                                                                                                                                |                                                                                                                                                                                                                                                                                                                                                                                                                                                                                                                                                                                                                                                                                                                                                                                                                                                                                                                                                                                                                                                                                                                                                                                                |                                                                                                                                                                                                                                                                                                                                                                                                                                                                                                                                                                                                                                                                                                                                                                                                                                                                                                                                                                                                                                                                                                                                                                                                                                                                                                                                                                                                                                                                             |  |  |  |
|--------------------------------------------------------------------------------------------------------------------------------------------------------------------------------------------------------------------------------------------------------------------------------------------------------------------------------------------------------------------------------------------------------------------------------------------------------------------------------------------------------------------------------------------------------------------------------------------------------------------------------------------------------------------------------------------------------------------------------------------------------------------------------------------------------------------------------------------------------------------------------------------------------------------------------------------------------------------------------------------------------------------------------------------------------------------------------------------------------------------------------------------------------------------------------------------------------------------------------|------------------------------------------------------------------------------------------------------------------------------------------------------------------------------------------------------------------------------------------------------------------------------------------------------------------------------------------------------------------------------------------------------------------------------------------------------------------------------------------------------------------------------------------------------------------------------------------------------------------------------------------------------------------------------------------------------------------------------------------------------------------------------------------------------------------------------------------------------------------------------------------------------------------------------------------------------------------------------------------------------------------------------------------------------------------------------------------------------------------------------------------------------------------------------------------------|-----------------------------------------------------------------------------------------------------------------------------------------------------------------------------------------------------------------------------------------------------------------------------------------------------------------------------------------------------------------------------------------------------------------------------------------------------------------------------------------------------------------------------------------------------------------------------------------------------------------------------------------------------------------------------------------------------------------------------------------------------------------------------------------------------------------------------------------------------------------------------------------------------------------------------------------------------------------------------------------------------------------------------------------------------------------------------------------------------------------------------------------------------------------------------------------------------------------------------------------------------------------------------------------------------------------------------------------------------------------------------------------------------------------------------------------------------------------------------|--|--|--|
| <p>required action, including a withdrawal from the Palestinian territories and an end to occupation.</p> <p>Fifty-seven countries are not at peace with Israel today.</p> <p>– we are in the best possible position to resolve 60 years of conflict between Israel and Palestine.</p> <p>We have a chance to answer this third of the world who are not at peace with Israel and who demand freedom and dignity for the Palestinian people.</p> <p>It is difficult to exaggerate how great the stakes are, for Americans, for Arabs, for Israelis, and indeed for the whole world.</p> <p>I am not here today to speak only of the Israeli-Palestinian conflict.</p> <p>the Arab world and the United States must begin with the resolution of the Israeli-Palestinian conflict.</p> <p>This year is an unprecedented opportunity to reach a comprehensive settlement between Israel and all its neighbours.</p> <p>In Israel, there are those who oppose any movement toward resolution.</p> <p>Israel's security cannot depend indefinitely on occupation, walls, and the Israeli military. Real security for Israel will occur when it is a neighbour among neighbours,</p> <p>Security and new acceptance for Israel,</p> | <p>Arab Leaders group will meet in Jordan.</p> <p>The Arab world and the international community must exert every effort to support reconstruction and development.</p> <p>We can only solve the Arab-Israeli conflict by addressing the issue at its core</p> <p>In 2002, the 22 Arab states - agreeing unanimously - led the way with a breakthrough peace proposal</p> <p>Under the Arab Peace Initiative, Israel's security would be guaranteed, and the occupation of Palestine would end, in accord with UN resolutions.</p> <p>Arab leaders have worked intensively to move such a process forward. This March, our countries unanimously renewed the Arab Peace Initiative.</p> <p>The Arab and Muslim states have committed to an unprecedented and unanimous peace initiative</p> <p>It is difficult to exaggerate how great the stakes are, for Americans, for Arabs, for Israelis, and indeed for the whole world.</p> <p>A strong cooperative Arab-American strategic partnership must be created.</p> <p>The beginning of a long-term strategic partnership between the Arab world and the United States must begin with the resolution of the Israeli-Palestinian conflict.</p> | <p>Frustration over the Palestinian situation has fuelled radicalism.</p> <p>The first step is – must be – peace at the core. Justice and statehood, finally, for the Palestinian people.</p> <p>June 4th, 1967, marks the last day a Palestinian lived free of occupation</p> <p>For Palestinians, justice and a future, in an independent, sovereign, and viable state</p> <p>as sources of security support and as investors in the Palestinian economy</p> <p>The conflict between Israel and the Palestinians is the core conflict in our region.</p> <p>one that brings statehood and freedom for Palestinians and security and more regional acceptance for Israel.</p> <p>For with every day that justice is denied to Palestinians; with every day that the occupation prevents a positive future; the regional and global impact has grown.</p> <p>Today I want to talk about the Palestinian-Israeli conflict, which has almost defined the modern history of my region.</p> <p>For Palestinians to reap the promise of the 21st century,</p> <p>the right of Palestinians to statehood and the right of Israelis to security.</p> <p>ending the occupation; creating a Palestinian state; and providing security guarantees and normal relations for Israel.</p> <p>And let me be clear: any Israeli effort to substitute Palestinian development for Palestinian independence cannot bring peace and stability to the region.</p> <p>Israel must know that</p> |  |  |  |
|--------------------------------------------------------------------------------------------------------------------------------------------------------------------------------------------------------------------------------------------------------------------------------------------------------------------------------------------------------------------------------------------------------------------------------------------------------------------------------------------------------------------------------------------------------------------------------------------------------------------------------------------------------------------------------------------------------------------------------------------------------------------------------------------------------------------------------------------------------------------------------------------------------------------------------------------------------------------------------------------------------------------------------------------------------------------------------------------------------------------------------------------------------------------------------------------------------------------------------|------------------------------------------------------------------------------------------------------------------------------------------------------------------------------------------------------------------------------------------------------------------------------------------------------------------------------------------------------------------------------------------------------------------------------------------------------------------------------------------------------------------------------------------------------------------------------------------------------------------------------------------------------------------------------------------------------------------------------------------------------------------------------------------------------------------------------------------------------------------------------------------------------------------------------------------------------------------------------------------------------------------------------------------------------------------------------------------------------------------------------------------------------------------------------------------------|-----------------------------------------------------------------------------------------------------------------------------------------------------------------------------------------------------------------------------------------------------------------------------------------------------------------------------------------------------------------------------------------------------------------------------------------------------------------------------------------------------------------------------------------------------------------------------------------------------------------------------------------------------------------------------------------------------------------------------------------------------------------------------------------------------------------------------------------------------------------------------------------------------------------------------------------------------------------------------------------------------------------------------------------------------------------------------------------------------------------------------------------------------------------------------------------------------------------------------------------------------------------------------------------------------------------------------------------------------------------------------------------------------------------------------------------------------------------------------|--|--|--|

|                                                                                                                                                                                                                                                                                                                                                                                                                                                                                                                                                                                                                                                                                                                                                                                                                                                                                                                                                                                                                                                                                                                                                                                                                     |                                                                                                                                                                                                                                                                                                                                                                                                                                                                                                                                                                                                                                                                                                                                                                                                                                                                                                                                                                                                                                                                                                                                                                                                         |                                                                                                                                                                                                                                                                                                                                                                                                                                                                                                                                                                                                                                                                                                                                                                                                                                                                                                                                                                                                                     |  |  |  |
|---------------------------------------------------------------------------------------------------------------------------------------------------------------------------------------------------------------------------------------------------------------------------------------------------------------------------------------------------------------------------------------------------------------------------------------------------------------------------------------------------------------------------------------------------------------------------------------------------------------------------------------------------------------------------------------------------------------------------------------------------------------------------------------------------------------------------------------------------------------------------------------------------------------------------------------------------------------------------------------------------------------------------------------------------------------------------------------------------------------------------------------------------------------------------------------------------------------------|---------------------------------------------------------------------------------------------------------------------------------------------------------------------------------------------------------------------------------------------------------------------------------------------------------------------------------------------------------------------------------------------------------------------------------------------------------------------------------------------------------------------------------------------------------------------------------------------------------------------------------------------------------------------------------------------------------------------------------------------------------------------------------------------------------------------------------------------------------------------------------------------------------------------------------------------------------------------------------------------------------------------------------------------------------------------------------------------------------------------------------------------------------------------------------------------------------|---------------------------------------------------------------------------------------------------------------------------------------------------------------------------------------------------------------------------------------------------------------------------------------------------------------------------------------------------------------------------------------------------------------------------------------------------------------------------------------------------------------------------------------------------------------------------------------------------------------------------------------------------------------------------------------------------------------------------------------------------------------------------------------------------------------------------------------------------------------------------------------------------------------------------------------------------------------------------------------------------------------------|--|--|--|
| <p>within its neighbourhood and around the world;</p> <p>For Israel, it has been 41 years of incessant conflict.</p> <p>For Israelis, recognition and security – a security that isolation, behind walls and military forces, can never bring.</p> <p>The conflict between Israel and the Palestinians is the core conflict in our region.</p> <p>and security and more regional acceptance for Israel.</p> <p>Today I want to talk about the Palestinian-Israeli conflict, for Israelis to achieve the enduring security they seek,</p> <p>these include the Israeli voices for turning back the clock on negotiations -</p> <p>and providing security guarantees and normal relations for Israel.</p> <p>This offers Israel a place in its neighbourhood and more: acceptance by the one-third of the UN members</p> <p>Israel now has to make its choice.</p> <p>Or to remain fortress Israel, isolated, and holding itself and the entire region a hostage to continuing confrontation.</p> <p>any Israeli effort to substitute Palestinian development for Palestinian independence cannot bring peace and stability to the region.</p> <p>Israel must know that attempting to delay this solution will be</p> | <p>a new partnership between your country and the Arab and Muslim peoples,</p> <p>There has been no easing of the public perception that the global system has ignored the Arab and Muslim world.</p> <p>We meet here today, on a day – June 4th – that resonates in the ears of every Arab. June 4th, 1967, marks the last day a Palestinian lived free of occupation.</p> <p>Bonds between the Arab, Muslim, and British peoples go back hundreds of years.</p> <p>I treasure this honorary degree as a symbol of the close relationship between Oxford and the Arab world.</p> <p>Together, we can make a reality of our shared humanity - European, Asian, Arab; Muslim, Christian, Jew; East and West.</p> <p>And they include extremist voices in the Arab world that preach war.</p> <p>And for seven years, against all provocation, the landmark Arab Peace Initiative has held.</p> <p>By its unanimous voice, by its serious approach, the Arab Peace Initiative is the most important proposal for peace in the history of this conflict.</p> <p>I cannot emphasise enough how important US partnership is, to help Israel accept the opening the Arab world has offered, work with us,</p> | <p>attempting to delay this solution will be disastrous for its own future as well as for the future of the Palestinians.</p> <p>The Palestinian-Israeli conflict does not take place in a vacuum.</p> <p>One example is the work Arab states are already doing to encourage Palestinian reconciliation.</p> <p>Development aid will not succeed if it is designed as a substitute for Palestinian independence.</p> <p>Palestinian suffering.</p> <p>The US commitment to Palestinian statehood must be unambiguous, in deeds as well as words.</p> <p>that will finally end the Palestinian-Israeli conflict on the basis of the two-state solution,</p> <p>which meets the legitimate right of the Palestinians to freedom and statehood and offers Israel the security guarantees and normal relations it needs.</p> <p>the Nakba, the Catastrophe that began for the Palestinian people 61 years ago.</p> <p>This history has been a catastrophe not only for Palestinians, but for the entire Middle East</p> |  |  |  |
|---------------------------------------------------------------------------------------------------------------------------------------------------------------------------------------------------------------------------------------------------------------------------------------------------------------------------------------------------------------------------------------------------------------------------------------------------------------------------------------------------------------------------------------------------------------------------------------------------------------------------------------------------------------------------------------------------------------------------------------------------------------------------------------------------------------------------------------------------------------------------------------------------------------------------------------------------------------------------------------------------------------------------------------------------------------------------------------------------------------------------------------------------------------------------------------------------------------------|---------------------------------------------------------------------------------------------------------------------------------------------------------------------------------------------------------------------------------------------------------------------------------------------------------------------------------------------------------------------------------------------------------------------------------------------------------------------------------------------------------------------------------------------------------------------------------------------------------------------------------------------------------------------------------------------------------------------------------------------------------------------------------------------------------------------------------------------------------------------------------------------------------------------------------------------------------------------------------------------------------------------------------------------------------------------------------------------------------------------------------------------------------------------------------------------------------|---------------------------------------------------------------------------------------------------------------------------------------------------------------------------------------------------------------------------------------------------------------------------------------------------------------------------------------------------------------------------------------------------------------------------------------------------------------------------------------------------------------------------------------------------------------------------------------------------------------------------------------------------------------------------------------------------------------------------------------------------------------------------------------------------------------------------------------------------------------------------------------------------------------------------------------------------------------------------------------------------------------------|--|--|--|

|                                                                                                                                                                                                                                                                                                                                                                                                                                                                                                                                                                                                                                                                                                           |                                                                                                                                                                                                                                                                                                                                                                                                                                                                                                                                                                                                                                                                                                                                                                                                                  |  |  |  |  |
|-----------------------------------------------------------------------------------------------------------------------------------------------------------------------------------------------------------------------------------------------------------------------------------------------------------------------------------------------------------------------------------------------------------------------------------------------------------------------------------------------------------------------------------------------------------------------------------------------------------------------------------------------------------------------------------------------------------|------------------------------------------------------------------------------------------------------------------------------------------------------------------------------------------------------------------------------------------------------------------------------------------------------------------------------------------------------------------------------------------------------------------------------------------------------------------------------------------------------------------------------------------------------------------------------------------------------------------------------------------------------------------------------------------------------------------------------------------------------------------------------------------------------------------|--|--|--|--|
| <p>disastrous for its own future</p> <p>to help Israel accept the opening the Arab world has offered,</p> <p>The Palestinian-Israeli conflict does not take place in a vacuum.</p> <p>against Israeli actions to force Jerusalem's Arab, Muslim and Christian population out</p> <p>that will finally end the Palestinian-Israeli conflict on the basis of the two-state solution,</p> <p>and offers Israel the security guarantees and normal relations it needs.</p> <p>We have committed. So, now, must Israel.</p> <p>The Arab Peace Initiative has offered Israel a place in the neighbourhood and more: acceptance by 57 nations, the one-third of the UN members that do not recognise Israel.</p> | <p>and move forward.</p> <p>One example is the work Arab states are already doing to encourage Palestinian reconciliation.</p> <p>against Israeli actions to force Jerusalem's Arab, Muslim and Christian population out or to threaten Muslim and Christian holy sites.</p> <p>Let me say, Arabs and Muslims throughout the world took note of the President's inaugural pledge, for a new partnership based on mutual respect and mutual interest. His outreach since then has been well received in the Arab world.</p> <p>Nowhere is this unity more evident than in the Arab Peace Initiative.</p> <p>The Arab Peace Initiative has offered Israel a place in the neighbourhood</p> <p>The Arab Peace Initiative is just one expression of our region's determination to shape its own positive future.</p> |  |  |  |  |
|-----------------------------------------------------------------------------------------------------------------------------------------------------------------------------------------------------------------------------------------------------------------------------------------------------------------------------------------------------------------------------------------------------------------------------------------------------------------------------------------------------------------------------------------------------------------------------------------------------------------------------------------------------------------------------------------------------------|------------------------------------------------------------------------------------------------------------------------------------------------------------------------------------------------------------------------------------------------------------------------------------------------------------------------------------------------------------------------------------------------------------------------------------------------------------------------------------------------------------------------------------------------------------------------------------------------------------------------------------------------------------------------------------------------------------------------------------------------------------------------------------------------------------------|--|--|--|--|
